# Supplementary material
Source: PubMed Central journal article supplement (PMC6352899)

## Supporting Information

### **A General Amino Acid Synthesis Enabled by Innate Radical Cross-Coupling**

*Shengyang Ni, Alberto F. Garrido-Castro, Rohan R. Merchant, Justine N. de Gruyter, Daniel C. Schmitt, James J. Mousseau, Gary M. Gallego, Shouliang Yang, Michael R. Collins, Jennifer X. Qiao, Kap-Sun Yeung, David R. Langley, Michael A. Poss, Paul M. Scola, Tian Qin, and Phil S. Baran\**

anie\_201809310\_sm\_miscellaneous\_information.pdf

## Table of Contents

|                                                                                                                         |            |
|-------------------------------------------------------------------------------------------------------------------------|------------|
| <b>General Experimental .....</b>                                                                                       | <b>S13</b> |
| <b>Handling of [Ni] Catalysts .....</b>                                                                                 | <b>S13</b> |
| <b>General Procedure for the Synthesis of TCNHPI Redox-Active Esters (General Procedure A).....</b>                     | <b>S14</b> |
| <b>Optimization for Amino Acid Synthesis .....</b>                                                                      | <b>S16</b> |
| <b>General Procedure for Sulfinimine Synthesis (General Procedure B) .....</b>                                          | <b>S19</b> |
| <b>Graphical Supporting Information for Sulfinimine Synthesis (General Procedure B) .....</b>                           | <b>S20</b> |
| Compound SI-1 .....                                                                                                     | S23        |
| Compound SI-2 .....                                                                                                     | S26        |
| <b>General Procedure for Decarboxylative Amino Acid Synthesis (General Procedure C) .....</b>                           | <b>S28</b> |
| <b>Graphical Supporting Information for Decarboxylative Amino Acid Synthesis (General Procedure C) .....</b>            | <b>S29</b> |
| <b>General Procedure for One-Pot Activation of Carboxylic Acids in Amino Acid Synthesis (General Procedure D) .....</b> | <b>S32</b> |
| <b>General Procedure when Using Benzyl Bromide for Amino Acid Synthesis (General Procedure E).....</b>                  | <b>S33</b> |
| <b>Troubleshooting: Frequently Asked Questions .....</b>                                                                | <b>S34</b> |
| Part I. Redox-Active Ester Synthesis .....                                                                              | S34        |
| Part II. Preparation of Sulfinimine Reagents .....                                                                      | S34        |
| Part III. Decarboxylative Amino Acid Synthesis .....                                                                    | S36        |
| Part IV. One-pot Activation of Carboxylic Acids for Decarboxylative Amino Acid Synthesis.....                           | S38        |
| <b>Experimental Procedures and Characterization Data for Acids.....</b>                                                 | <b>S40</b> |
| Compound SI-3 .....                                                                                                     | S40        |
| Compound SI-4 .....                                                                                                     | S41        |
| Compound SI-5 .....                                                                                                     | S41        |

|                                                                                        |            |
|----------------------------------------------------------------------------------------|------------|
| <b>Experimental Procedures and Characterization Data for Redox-Active Esters .....</b> | <b>S43</b> |
| Compound SI-6 .....                                                                    | S43        |
| Compound SI-7 .....                                                                    | S43        |
| Compound SI-8 .....                                                                    | S44        |
| Compound SI-9 .....                                                                    | S45        |
| Compound SI-10 .....                                                                   | S45        |
| Compound SI-11 .....                                                                   | S46        |
| Compound SI-12 .....                                                                   | S47        |
| Compound SI-13 .....                                                                   | S47        |
| Compound SI-14 .....                                                                   | S48        |
| Compound SI-15 .....                                                                   | S49        |
| Compound SI-16 .....                                                                   | S49        |
| Compound SI-17 .....                                                                   | S50        |
| Compound SI-18 .....                                                                   | S51        |
| Compound SI-19 .....                                                                   | S51        |
| Compound SI-20 .....                                                                   | S52        |
| Compound SI-21 .....                                                                   | S53        |
| Compound SI-22 .....                                                                   | S53        |
| Compound SI-23 .....                                                                   | S54        |
| Compound SI-24 .....                                                                   | S55        |
| Compound SI-25 .....                                                                   | S56        |
| Compound SI-26 .....                                                                   | S57        |
| <b>Experimental Procedures and Characterization Data for Sulfinimines.....</b>         | <b>S58</b> |
| Compound 2 .....                                                                       | S58        |
| Compound 2b .....                                                                      | S58        |
| <b>Experimental Procedures and Characterization Data for Amino Acids .....</b>         | <b>S60</b> |
| Compound 3 .....                                                                       | S60        |
| Compound 8 .....                                                                       | S61        |
| Compound 9 .....                                                                       | S61        |
| Compound 10 .....                                                                      | S62        |

|                   |     |
|-------------------|-----|
| Compound 11 ..... | S63 |
| Compound 12 ..... | S63 |
| Compound 13 ..... | S64 |
| Compound 14 ..... | S65 |
| Compound 15 ..... | S66 |
| Compound 16 ..... | S66 |
| Compound 17 ..... | S67 |
| Compound 18 ..... | S68 |
| Compound 19 ..... | S69 |
| Compound 20 ..... | S69 |
| Compound 21 ..... | S70 |
| Compound 22 ..... | S71 |
| Compound 23 ..... | S71 |
| Compound 24 ..... | S72 |
| Compound 25 ..... | S73 |
| Compound 26 ..... | S74 |
| Compound 27 ..... | S75 |
| Compound 28 ..... | S75 |
| Compound 29 ..... | S76 |
| Compound 30 ..... | S77 |
| Compound 31 ..... | S78 |
| Compound 32 ..... | S79 |
| Compound 33 ..... | S80 |
| Compound 34 ..... | S80 |
| Compound 35 ..... | S81 |
| Compound 36 ..... | S82 |
| Compound 37 ..... | S83 |
| Compound 38 ..... | S84 |
| Compound 39 ..... | S84 |
| Compound 40 ..... | S85 |

|                                                     |             |
|-----------------------------------------------------|-------------|
| Compound 41 .....                                   | S86         |
| Compound 42 .....                                   | S87         |
| Compound 43 .....                                   | S87         |
| Compound 44 .....                                   | S88         |
| Compound 45 .....                                   | S89         |
| Compound 46 .....                                   | S90         |
| Compound 47 .....                                   | S91         |
| Compound 48 .....                                   | S91         |
| Compound 49 .....                                   | S92         |
| Compound 50 .....                                   | S93         |
| Compound 51 .....                                   | S94         |
| Compound 52 .....                                   | S95         |
| Compound 53 .....                                   | S96         |
| Compound 54 .....                                   | S97         |
| Compound 56 .....                                   | S99         |
| Compound 58 .....                                   | S101        |
| Compound 59 .....                                   | S103        |
| Compound 60 .....                                   | S104        |
| Compound 61 .....                                   | S104        |
| Compound 62 .....                                   | S105        |
| Compound 63 .....                                   | S106        |
| Compound 63-a .....                                 | S107        |
| Compound 64 .....                                   | S107        |
| Compound 65 .....                                   | S108        |
| Compound 66 .....                                   | S109        |
| <b>Library Synthesis Procedure .....</b>            | <b>S110</b> |
| <b>Amino Ester Data from Library Synthesis.....</b> | <b>S112</b> |
| Compound 68b .....                                  | S112        |
| Compound 69b .....                                  | S113        |
| Compound 70b .....                                  | S113        |

|                                                          |             |
|----------------------------------------------------------|-------------|
| Compound 71b .....                                       | S114        |
| Compound 72b .....                                       | S115        |
| Compound 74b .....                                       | S116        |
| Compound 75b .....                                       | S117        |
| Compound 76b .....                                       | S118        |
| Compound 77b .....                                       | S119        |
| Compound 78b .....                                       | S120        |
| Compound 79b .....                                       | S121        |
| Compound 80b .....                                       | S122        |
| Compound 82b .....                                       | S122        |
| Compound 84-1 .....                                      | S123        |
| Compound 84b .....                                       | S124        |
| Compound 85b .....                                       | S124        |
| Compound 86b .....                                       | S125        |
| Compound 87b .....                                       | S125        |
| Compound 88b .....                                       | S126        |
| Compound 89b .....                                       | S127        |
| Compound 91b .....                                       | S127        |
| Compound 92b .....                                       | S128        |
| Compound 94b .....                                       | S129        |
| Compound 95b .....                                       | S129        |
| Compound 96b .....                                       | S130        |
| Compound 97b .....                                       | S130        |
| <b>X-Ray Crystallographic Data for Compound 3 .....</b>  | <b>S132</b> |
| <b>X-Ray Crystallographic Data for Compound 50 .....</b> | <b>S137</b> |
| <b>References .....</b>                                  | <b>S142</b> |
| <b>Spectra for Redox-Active Esters .....</b>             | <b>S145</b> |
| Compound SI-6 <sup>1</sup> H NMR .....                   | S145        |
| Compound SI-6 <sup>13</sup> C NMR .....                  | S146        |
| Compound SI-7 <sup>1</sup> H NMR .....                   | S147        |

|                                         |      |
|-----------------------------------------|------|
| Compound SI-7 $^{13}\text{C}$ NMR.....  | S148 |
| Compound SI-8 $^1\text{H}$ NMR.....     | S149 |
| Compound SI-8 $^{13}\text{C}$ NMR.....  | S150 |
| Compound SI-9 $^1\text{H}$ NMR.....     | S151 |
| Compound SI-9 $^{13}\text{C}$ NMR.....  | S152 |
| Compound SI-10 $^1\text{H}$ NMR.....    | S153 |
| Compound SI-10 $^{13}\text{C}$ NMR..... | S154 |
| Compound SI-11 $^1\text{H}$ NMR.....    | S155 |
| Compound SI-11 $^{13}\text{C}$ NMR..... | S156 |
| Compound SI-12 $^1\text{H}$ NMR.....    | S157 |
| Compound SI-12 $^{13}\text{C}$ NMR..... | S158 |
| Compound SI-13 $^1\text{H}$ NMR.....    | S159 |
| Compound SI-13 $^{13}\text{C}$ NMR..... | S160 |
| Compound SI-14 $^1\text{H}$ NMR.....    | S161 |
| Compound SI-14 $^{13}\text{C}$ NMR..... | S162 |
| Compound SI-15 $^1\text{H}$ NMR.....    | S163 |
| Compound SI-15 $^{13}\text{C}$ NMR..... | S164 |
| Compound SI-16 $^1\text{H}$ NMR.....    | S165 |
| Compound SI-16 $^{13}\text{C}$ NMR..... | S166 |
| Compound SI-17 $^1\text{H}$ NMR.....    | S167 |
| Compound SI-17 $^{13}\text{C}$ NMR..... | S168 |
| Compound SI-18 $^1\text{H}$ NMR.....    | S169 |
| Compound SI-18 $^{13}\text{C}$ NMR..... | S170 |
| Compound SI-18 $^{19}\text{F}$ NMR..... | S171 |
| Compound SI-19 $^1\text{H}$ NMR.....    | S172 |
| Compound SI-19 $^{13}\text{C}$ NMR..... | S173 |
| Compound SI-20 $^1\text{H}$ NMR.....    | S174 |
| Compound SI-20 $^{13}\text{C}$ NMR..... | S175 |
| Compound SI-21 $^1\text{H}$ NMR.....    | S176 |
| Compound SI-21 $^{13}\text{C}$ NMR..... | S177 |

|                                                            |             |
|------------------------------------------------------------|-------------|
| Compound SI-22 <sup>1</sup> H NMR.....                     | S178        |
| Compound SI-22 <sup>13</sup> C NMR.....                    | S179        |
| Compound SI-23 <sup>1</sup> H NMR.....                     | S180        |
| Compound SI-23 <sup>13</sup> C NMR.....                    | S181        |
| Compound SI-24 <sup>1</sup> H NMR.....                     | S182        |
| Compound SI-24 <sup>13</sup> C NMR.....                    | S183        |
| Compound SI-25 <sup>1</sup> H NMR.....                     | S184        |
| Compound SI-25 <sup>13</sup> C NMR.....                    | S185        |
| <b>Spectra for Sulfinimines.....</b>                       | <b>S186</b> |
| Compound 2 <sup>1</sup> H NMR.....                         | S186        |
| Compound 2 <sup>13</sup> C NMR.....                        | S187        |
| Compound 2b <sup>1</sup> H NMR.....                        | S188        |
| Compound 2b <sup>13</sup> C NMR.....                       | S189        |
| <b>Spectra for Decarboxylative Addition Products .....</b> | <b>S190</b> |
| Compound 3 <sup>1</sup> H NMR.....                         | S190        |
| Compound 3 <sup>13</sup> C NMR.....                        | S191        |
| Compound 8 <sup>1</sup> H NMR.....                         | S192        |
| Compound 8 <sup>13</sup> C NMR.....                        | S193        |
| Compound 9 <sup>1</sup> H NMR.....                         | S194        |
| Compound 9 <sup>13</sup> C NMR.....                        | S195        |
| Compound 10 <sup>1</sup> H NMR.....                        | S196        |
| Compound 10 <sup>13</sup> C NMR.....                       | S197        |
| Compound 11 <sup>1</sup> H NMR.....                        | S198        |
| Compound 11 <sup>13</sup> C NMR.....                       | S199        |
| Compound 12 <sup>1</sup> H NMR.....                        | S200        |
| Compound 12 <sup>13</sup> C NMR.....                       | S201        |
| Compound 13 <sup>1</sup> H NMR.....                        | S202        |
| Compound 13 <sup>13</sup> C NMR.....                       | S203        |
| Compound 14 <sup>1</sup> H NMR.....                        | S204        |
| Compound 14 <sup>13</sup> C NMR.....                       | S205        |



|                                      |      |
|--------------------------------------|------|
| Compound 15 $^1\text{H}$ NMR.....    | S206 |
| Compound 15 $^{13}\text{C}$ NMR..... | S207 |
| Compound 16 $^1\text{H}$ NMR.....    | S208 |
| Compound 16 $^{13}\text{C}$ NMR..... | S209 |
| Compound 17 $^1\text{H}$ NMR.....    | S210 |
| Compound 17 $^{13}\text{C}$ NMR..... | S211 |
| Compound 18 $^1\text{H}$ NMR.....    | S212 |
| Compound 18 $^{13}\text{C}$ NMR..... | S213 |
| Compound 19 $^1\text{H}$ NMR.....    | S214 |
| Compound 19 $^{13}\text{C}$ NMR..... | S215 |
| Compound 20 $^1\text{H}$ NMR.....    | S216 |
| Compound 20 $^{13}\text{C}$ NMR..... | S217 |
| Compound 21 $^1\text{H}$ NMR.....    | S218 |
| Compound 21 $^{13}\text{C}$ NMR..... | S219 |
| Compound 22 $^1\text{H}$ NMR.....    | S220 |
| Compound 22 $^{13}\text{C}$ NMR..... | S221 |
| Compound 23 $^1\text{H}$ NMR.....    | S222 |
| Compound 23 $^{13}\text{C}$ NMR..... | S223 |
| Compound 24 $^1\text{H}$ NMR.....    | S224 |
| Compound 24 $^{13}\text{C}$ NMR..... | S225 |
| Compound 24 $^{19}\text{F}$ NMR..... | S226 |
| Compound 25 $^1\text{H}$ NMR.....    | S227 |
| Compound 25 $^{13}\text{C}$ NMR..... | S228 |
| Compound 26 $^1\text{H}$ NMR.....    | S229 |
| Compound 26 $^{13}\text{C}$ NMR..... | S230 |
| Compound 27 $^1\text{H}$ NMR.....    | S231 |
| Compound 27 $^{13}\text{C}$ NMR..... | S232 |
| Compound 28 $^1\text{H}$ NMR.....    | S233 |
| Compound 28 $^{13}\text{C}$ NMR..... | S234 |
| Compound 29 $^1\text{H}$ NMR.....    | S235 |

|                                      |      |
|--------------------------------------|------|
| Compound 29 <sup>13</sup> C NMR..... | S236 |
| Compound 30 <sup>1</sup> H NMR.....  | S237 |
| Compound 30 <sup>13</sup> C NMR..... | S238 |
| Compound 31 <sup>1</sup> H NMR.....  | S239 |
| Compound 31 <sup>13</sup> C NMR..... | S240 |
| Compound 32 <sup>1</sup> H NMR.....  | S241 |
| Compound 32 <sup>13</sup> C NMR..... | S242 |
| Compound 33 <sup>1</sup> H NMR.....  | S243 |
| Compound 33 <sup>13</sup> C NMR..... | S244 |
| Compound 34 <sup>1</sup> H NMR.....  | S245 |
| Compound 34 <sup>13</sup> C NMR..... | S246 |
| Compound 35 <sup>1</sup> H NMR.....  | S247 |
| Compound 35 <sup>13</sup> C NMR..... | S248 |
| Compound 36 <sup>1</sup> H NMR.....  | S249 |
| Compound 36 <sup>13</sup> C NMR..... | S250 |
| Compound 37 <sup>1</sup> H NMR.....  | S251 |
| Compound 37 <sup>13</sup> C NMR..... | S252 |
| Compound 38 <sup>1</sup> H NMR.....  | S253 |
| Compound 38 <sup>13</sup> C NMR..... | S254 |
| Compound 39 <sup>1</sup> H NMR.....  | S255 |
| Compound 39 <sup>13</sup> C NMR..... | S256 |
| Compound 39 <sup>19</sup> F NMR..... | S257 |
| Compound 40 <sup>1</sup> H NMR.....  | S258 |
| Compound 40 <sup>13</sup> C NMR..... | S259 |
| Compound 41 <sup>1</sup> H NMR.....  | S260 |
| Compound 41 <sup>13</sup> C NMR..... | S261 |
| Compound 42 <sup>1</sup> H NMR.....  | S262 |
| Compound 42 <sup>13</sup> C NMR..... | S263 |
| Compound 43 <sup>1</sup> H NMR.....  | S264 |
| Compound 43 <sup>13</sup> C NMR..... | S265 |

|                                       |      |
|---------------------------------------|------|
| Compound 44 $^1\text{H}$ NMR.....     | S266 |
| Compound 44 $^{13}\text{C}$ NMR.....  | S267 |
| Compound 45 $^1\text{H}$ NMR.....     | S268 |
| Compound 45 $^{13}\text{C}$ NMR.....  | S269 |
| Compound 46 $^1\text{H}$ NMR.....     | S270 |
| Compound 46 $^{13}\text{C}$ NMR.....  | S271 |
| Compound 47 $^1\text{H}$ NMR.....     | S272 |
| Compound 47 $^{13}\text{C}$ NMR.....  | S273 |
| Compound 48 $^1\text{H}$ NMR.....     | S274 |
| Compound 48 $^{13}\text{C}$ NMR.....  | S275 |
| Compound 49 $^1\text{H}$ NMR.....     | S276 |
| Compound 49 $^{13}\text{C}$ NMR.....  | S277 |
| Compound 50 $^1\text{H}$ NMR.....     | S278 |
| Compound 51 $^{13}\text{C}$ NMR.....  | S279 |
| Compound 51 $^1\text{H}$ NMR.....     | S280 |
| Compound 51 $^{13}\text{C}$ NMR.....  | S281 |
| Compound 51 $^{19}\text{F}$ NMR ..... | S282 |
| Compound 52 $^1\text{H}$ NMR.....     | S283 |
| Compound 52 $^{13}\text{C}$ NMR.....  | S284 |
| Compound 53 $^1\text{H}$ NMR.....     | S285 |
| Compound 53 $^{13}\text{C}$ NMR.....  | S286 |
| Compound 54 $^1\text{H}$ NMR.....     | S287 |
| Compound 54 $^{13}\text{C}$ NMR.....  | S288 |
| Compound 56 $^1\text{H}$ NMR.....     | S289 |
| Compound 56 $^{13}\text{C}$ NMR.....  | S290 |
| Compound 56 $^{19}\text{F}$ NMR ..... | S291 |
| Compound 56 HSQC 2D NMR .....         | S292 |
| Compound 58 $^1\text{H}$ NMR.....     | S293 |
| Compound 58 $^{13}\text{C}$ NMR.....  | S294 |
| Compound 58 $^{19}\text{F}$ NMR ..... | S295 |

|                                         |      |
|-----------------------------------------|------|
| Compound 59 <sup>1</sup> H NMR.....     | S296 |
| Compound 59 <sup>13</sup> C NMR.....    | S297 |
| Compound 60 <sup>1</sup> H NMR.....     | S298 |
| Compound 60 <sup>13</sup> C NMR.....    | S299 |
| Compound 61 <sup>1</sup> H NMR.....     | S300 |
| Compound 61 <sup>13</sup> C NMR.....    | S301 |
| Compound 62 <sup>1</sup> H NMR.....     | S302 |
| Compound 62 <sup>13</sup> C NMR.....    | S303 |
| Compound 63 <sup>1</sup> H NMR.....     | S304 |
| Compound 63 <sup>13</sup> C NMR.....    | S305 |
| Compound 63-a <sup>1</sup> H NMR.....   | S306 |
| Compound 63-a <sup>13</sup> C NMR.....  | S307 |
| Compound 64 <sup>1</sup> H NMR.....     | S308 |
| Compound 64 <sup>13</sup> C NMR.....    | S309 |
| Compound 65 <sup>1</sup> H NMR.....     | S310 |
| Compound 65 <sup>13</sup> C NMR.....    | S311 |
| Compound 66 <sup>1</sup> H NMR.....     | S312 |
| Compound 66 <sup>13</sup> C NMR.....    | S313 |
| Compound 84-1 <sup>1</sup> H NMR.....   | S314 |
| Compound 84-1 <sup>13</sup> C NMR ..... | S315 |

## General Experimental

Tetrahydrofuran (THF), *N,N*-dimethylformamide (DMF), and dichloromethane (CH<sub>2</sub>Cl<sub>2</sub>) were obtained by passing the previously degassed solvents through an activated alumina column. Anhydrous *N*-methyl-2-pyrrolidone (NMP) was purchased from Sigma-Aldrich. DIC (*N,N'*-diisopropylcarbodiimide) and DCC (*N,N'*-dicyclohexylcarbodiimide) were purchased from Chem-Impex. NiCl<sub>2</sub>•6H<sub>2</sub>O was purchased from Sigma-Aldrich (lot # MKBV1320V). All reagents were purchased at the highest commercial quality and used without further purification unless otherwise stated. Yields refer to chromatographically and spectroscopically (<sup>1</sup>H NMR) homogeneous material, unless otherwise stated. Reactions were monitored by thin layer chromatography (TLC), GC/MS, GC/FID, or LC/MS. TLC was performed using 0.25 mm E. Merck silica plates (60F-254), using short-wave UV light as the visualizing agent, and phosphomolybdic acid, *p*-anisaldehyde, or KMnO<sub>4</sub> and heat as developing agents. NMR spectra were recorded on Bruker DRX-600, DRX-500, and AMX-400 instruments and are calibrated using residual undeuterated solvent (CHCl<sub>3</sub>, CH<sub>2</sub>Cl<sub>2</sub>, DMSO, MeOH at 7.26, 5.32, 2.50 and 3.31 ppm for <sup>1</sup>H NMR, respectively, and 77.16, 53.84, 39.52 and 49.00 ppm for <sup>13</sup>C NMR, respectively). The following abbreviations were used to explain multiplicities: s = singlet, d = doublet, t = triplet, q = quartet, m = multiplet, br = broad. Column chromatography was performed using E. Merck silica gel (60, particle size 0.043–0.063 mm), and preparative TLC was performed on Merck silica plates (60F-254). High-resolution mass spectra (HRMS) were recorded on an Agilent LC/MSD TOF mass spectrometer by electrospray ionization time of flight reflectron experiments. Melting points were recorded on a Fisher-Johns 12-144 melting point apparatus and are uncorrected. Optical rotation data was recorded on an Anton Paar 100 Modular Circular Polarimeter.

## Handling of [Ni] Catalysts

All nickel catalysts were handled open to air on the bench top, and the bottles were not stored under inert atmosphere.

## General Procedure for the Synthesis of TCNHPI Redox-Active Esters (General Procedure A)

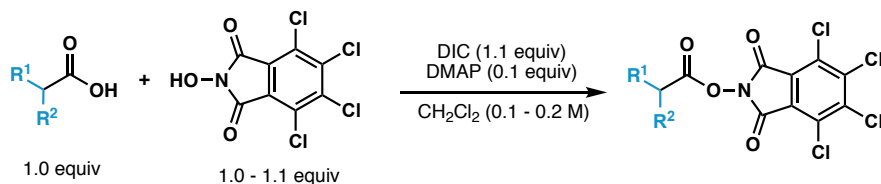

TCNHPI esters were prepared according to the previously reported procedure.<sup>1-3</sup> A round-bottom flask or culture tube was charged with carboxylic acid (1.0 equiv), *N*-hydroxytetrachlorophthalimide (1.0 – 1.1 equiv) and DMAP (0.1 equiv). Dichloromethane was added (0.1 – 0.2 M), and the mixture was stirred vigorously. Carboxylic acid (1.0 equiv) was added via syringe (if liquid). DIC (1.1 equiv) was then added dropwise via syringe, and the mixture was allowed to stir until the acid was consumed (determined by TLC). Typical reaction times were between 0.5 h and 12 h. The mixture was filtered (through a thin pad of Celite<sup>®</sup>, SiO<sub>2</sub>, or frit funnel) and rinsed with additional CH<sub>2</sub>Cl<sub>2</sub>/Et<sub>2</sub>O. The solvent was removed under reduced pressure, and purification of the crude mixture by column chromatography afforded the desired TCNHPI redox-active ester. If necessary, the TCNHPI redox-active ester could be further recrystallized from CH<sub>2</sub>Cl<sub>2</sub>/MeOH.

We have previously reported the synthesis of the redox-active esters shown below (Figure S1).<sup>1-3</sup> Please see ref. 1-2 for graphical supporting information on the synthesis of TCNHPI redox-active esters (RAEs).

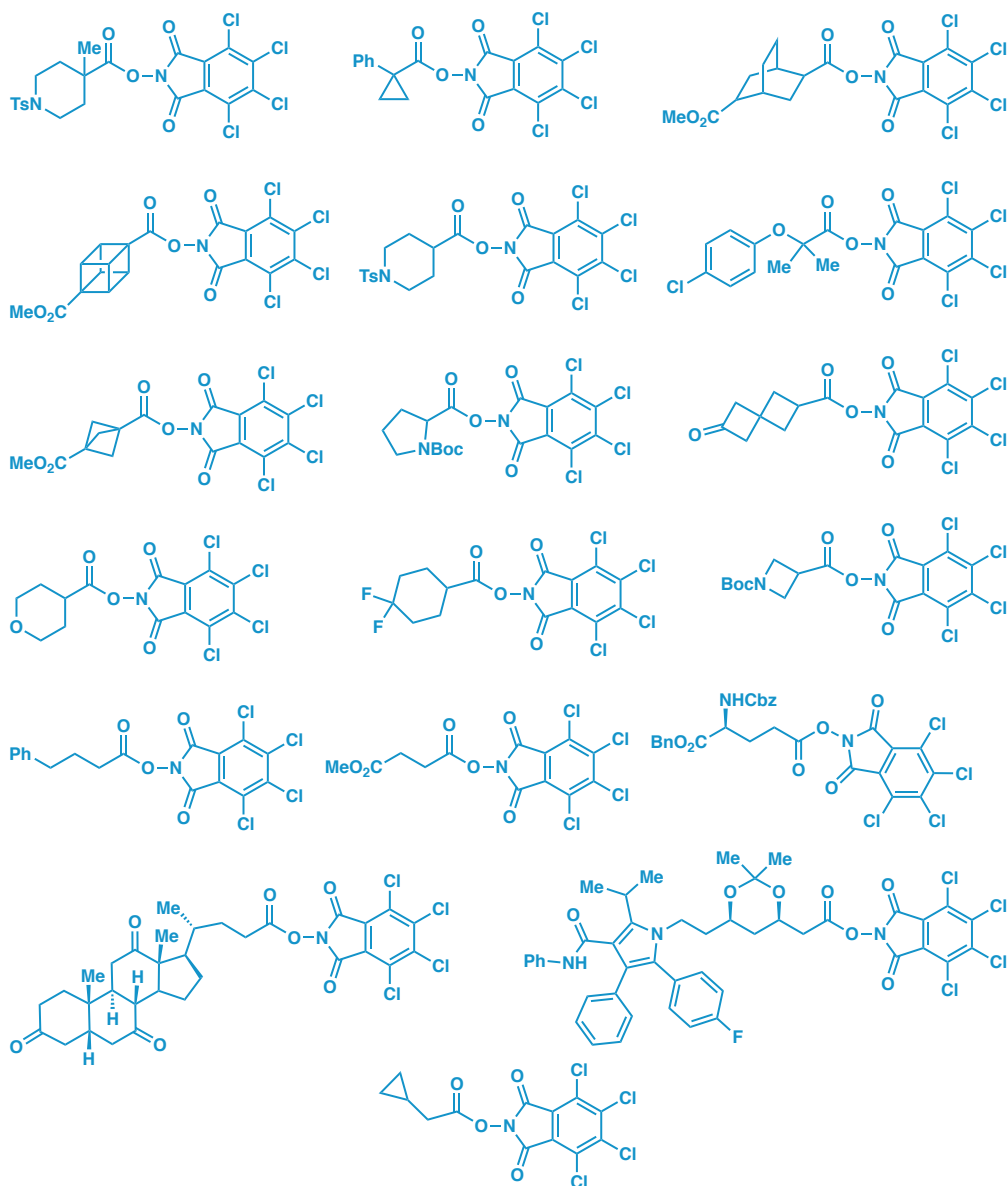

**Figure S1:** Previously Reported TCNHPI Redox-Active Esters.<sup>1-3</sup>

## Optimization for Amino Acid Synthesis

Using *tert*-butyl sulfinimine as radical acceptor and NHPI ester as radical precursor

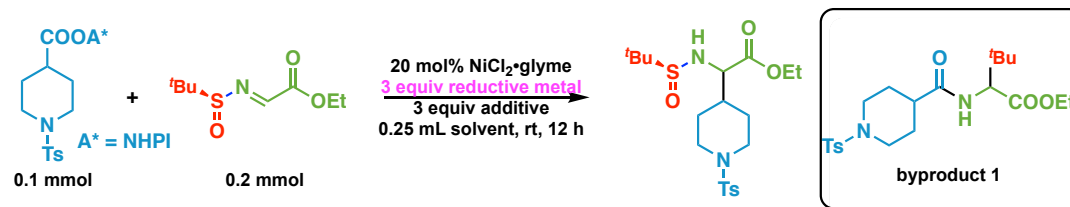

| [Ni]                                                 | Reductive reagents              | Additive                                | Solvent | Yield (%)                                   |
|------------------------------------------------------|---------------------------------|-----------------------------------------|---------|---------------------------------------------|
| NiCl <sub>2</sub> ·glyme                             | PMHS                            |                                         | DMA     | ND                                          |
| NiCl <sub>2</sub> ·glyme                             | PMHS                            | Et <sub>3</sub> N                       | DMA     | ND                                          |
| NiCl <sub>2</sub> ·glyme                             | PMHS                            | Mg(OAc) <sub>2</sub> ·4H <sub>2</sub> O | MeCN    | ND                                          |
| NiCl <sub>2</sub> ·glyme                             | PMHS                            | Mg(OAc) <sub>2</sub> ·4H <sub>2</sub> O | DMF     | ND                                          |
| NiCl <sub>2</sub> ·glyme                             | Mn                              | Mg(OAc) <sub>2</sub> ·4H <sub>2</sub> O | DMA     | < 2%                                        |
| NiCl <sub>2</sub> ·glyme                             | PMHS + 0.5 equiv Zn             | Mg(OAc) <sub>2</sub> ·4H <sub>2</sub> O | DMA     | ND                                          |
| NiCl <sub>2</sub> ·glyme                             | PhSiH <sub>3</sub>              | Mg(OAc) <sub>2</sub> ·4H <sub>2</sub> O | DMA     | ND                                          |
| NiCl <sub>2</sub> ·glyme                             | PMHS                            | Na <sub>2</sub> CO <sub>3</sub>         | DMA     | ND                                          |
| NiCl <sub>2</sub> ·glyme                             | PMHS                            | LiCl                                    | DMA     | ND                                          |
| NiCl <sub>2</sub> ·glyme                             | Zn                              | LiCl                                    | MeCN    | < 2%                                        |
| NiCl <sub>2</sub> ·glyme                             | Mn                              |                                         | MeCN    | ND                                          |
| NiCl <sub>2</sub> ·glyme                             | Mn                              | LiCl                                    | MeCN    | ND                                          |
| NiCl <sub>2</sub> ·glyme                             | B <sub>2</sub> Pin <sub>2</sub> | LiO <sup>t</sup> Bu                     | DMA     | ND                                          |
| NiCl <sub>2</sub> ·glyme                             | B <sub>2</sub> Pin <sub>2</sub> | LiO <sup>t</sup> Bu                     | DMA     | ND                                          |
| NiCl <sub>2</sub> ·glyme                             | B <sub>2</sub> Pin <sub>2</sub> | K <sub>3</sub> PO <sub>4</sub>          | DMA     | ND                                          |
| Cu(acac) <sub>2</sub>                                | B <sub>2</sub> Pin <sub>2</sub> | LiO <sup>t</sup> Bu                     | DMA     | ND                                          |
| NiCl <sub>2</sub> ·glyme                             | Zn                              | LiCl                                    | DMA     | < 2%                                        |
| Ni(batho)(DMF) <sub>2</sub> Cl <sub>2</sub>          | Mn                              |                                         | DMA     | < 2%                                        |
| Ni(acac) <sub>2</sub>                                | Zn                              | LiCl                                    | DMA     | < 2%                                        |
| NiCl <sub>2</sub> ·glyme                             | Zn                              | LiCl                                    | MeCN    | < 2%                                        |
| CrCl <sub>2</sub> 4 equiv                            |                                 |                                         | DMF     | carboxylic acid is the main byproduct > 80% |
| Ni(acac) <sub>2</sub>                                | Zn                              | LiCl                                    | MeCN    | < 2%                                        |
| NiCl <sub>2</sub> ·glyme                             | Zn                              |                                         | MeCN    | < 2%                                        |
| Ni(NO <sub>3</sub> ) <sub>2</sub> ·6H <sub>2</sub> O | Zn                              | LiCl                                    | MeCN    | < 2%                                        |
| NiBr <sub>2</sub> ·3H <sub>2</sub> O                 | Zn                              | LiCl                                    | MeCN    | < 2%                                        |
| Ni(OAc) <sub>2</sub>                                 | Zn                              | LiCl                                    | MeCN    | < 2%                                        |
| Ni(PPh <sub>3</sub> ) <sub>2</sub> Br <sub>2</sub>   | Zn                              | LiCl                                    | MeCN    | < 2%                                        |
| NiCl <sub>2</sub> ·6H <sub>2</sub> O                 | Zn                              | LiCl                                    | MeCN    | < 2%                                        |
| NiCl <sub>2</sub> ·glyme                             | Zn                              | LiBr                                    | MeCN    | ND                                          |
| NiCl <sub>2</sub> ·glyme                             | Zn                              | Mg(OAc) <sub>2</sub> ·4H <sub>2</sub> O | MeCN    | ND                                          |
| NiCl <sub>2</sub> ·glyme                             | Zn                              | LiCl                                    | MeCN    | < 2%                                        |



Using *p*-tolyl sulfinimine as radical acceptor and NHPI ester as radical precursor

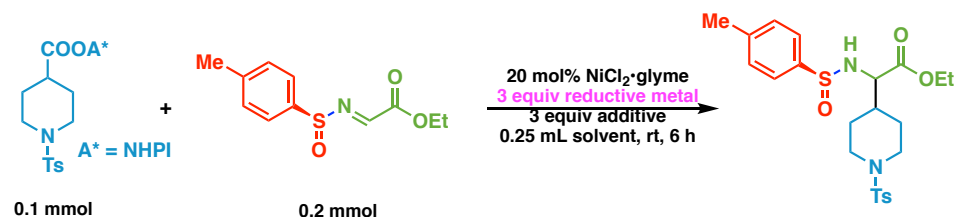

| [Ni]                                                    | Reductive reagents                     | Additive                                | Solvent  | Yield (%) |
|---------------------------------------------------------|----------------------------------------|-----------------------------------------|----------|-----------|
| NiI <sub>2</sub>                                        | Zn                                     | LiCl                                    | MeCN     | ND        |
| NiI <sub>2</sub>                                        | Zn                                     | LiCl + 1 equiv 2-naphthoic acid         | MeCN     | ND        |
| Ni(batho)(DMF) <sub>2</sub> Cl <sub>2</sub>             | Zn                                     |                                         | DMA      | ND        |
| FeBr <sub>2</sub>                                       | Zn                                     |                                         | DMA      | ND        |
| NiI <sub>2</sub>                                        | Mn                                     | LiCl                                    | MeCN     | ND        |
| NiCl <sub>2</sub> ·glyme                                | PMHS                                   | Mg(OAc) <sub>2</sub> ·4H <sub>2</sub> O | DMA      | ND        |
| isonicotinonitrile 2equiv                               | B <sub>2</sub> Pin <sub>2</sub> 100 °C | K <sub>3</sub> PO <sub>3</sub>          | toluence | ND        |
| AIBN 2equiv                                             | HE 90 °C                               |                                         | MeCN     | ND        |
| NiI <sub>2</sub> + dtbpy A* = TCNHPI                    | Zn                                     |                                         | MeCN     | ND        |
| NiCl <sub>2</sub> ·glyme + IPr·HCl                      | Zn                                     | 0.5 equiv CsCO <sub>3</sub>             | DMA      | ND        |
| NiCl <sub>2</sub> ·glyme + IPr·HCl                      | Zn                                     | 0.5 equiv CsCO <sub>3</sub>             | MeCN     | ND        |
| Fe(acac) <sub>3</sub>                                   | Zn                                     | LiCl                                    | THF      | ND        |
| Fe(acac) <sub>3</sub>                                   | PhSiH <sub>3</sub>                     |                                         | THF      | ND        |
| Fe(acac) <sub>3</sub>                                   | PhSiH <sub>3</sub>                     |                                         | DCM      | ND        |
| Ni(acac) <sub>2</sub> + dppBz                           | Zn                                     |                                         | DMA      | ND        |
| NiCl <sub>2</sub> ·6H <sub>2</sub> O                    | Zn                                     | LiCl                                    | THF      | ND        |
| Co(acac) <sub>2</sub>                                   | Zn                                     | LiCl                                    | DMA      | ND        |
| Ni(batho)(DMF) <sub>2</sub> Cl <sub>2</sub>             | HE+Zn                                  |                                         | DMA      | ND        |
| NiCl <sub>2</sub> ·6H <sub>2</sub> O + PPh <sub>3</sub> | Zn                                     |                                         | MeCN     | ND        |
| Fe(acac) <sub>3</sub> + dppBz                           | Zn                                     |                                         | DMA      | ND        |
| NiCl <sub>2</sub> ·6H <sub>2</sub> O                    | Zn                                     | LiCl                                    | MeCN     | ND        |

Using *p*-tolyl sulfinimine as radical acceptor and TCNHPI ester as radical precursor

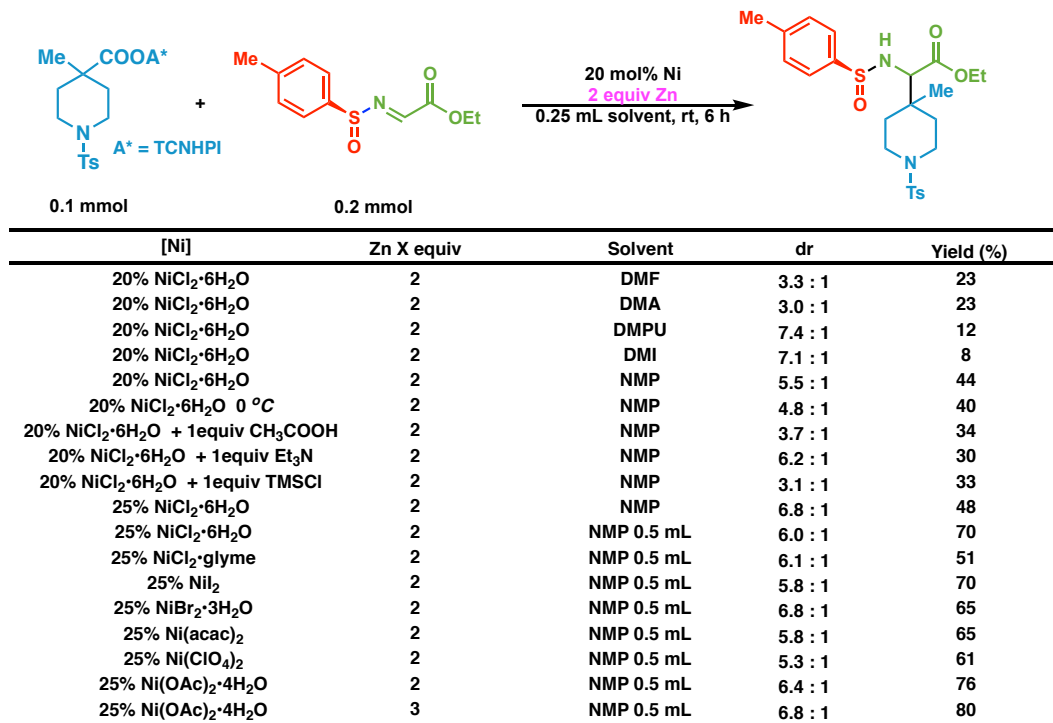

## General Procedure for Sulfinimine Synthesis (General Procedure B)

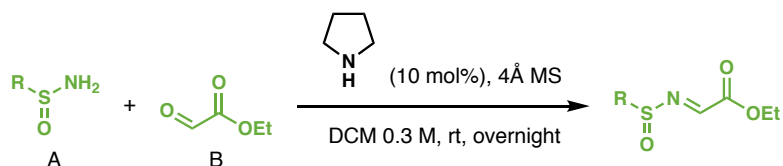

The sulfinimine was synthesized similar to a reported procedure.<sup>4</sup> A dry round-bottomed flask was charged with sulfinamide **A** (1 equiv) and 4 Å molecular sieves (1g/mmol). The flask was then evacuated and back-filled with argon (three times). Anhydrous CH<sub>2</sub>Cl<sub>2</sub> (0.3 M) was added using a syringe followed by addition of aldehyde **B** (1 equiv) and pyrrolidine (10 mol%). The mixture was stirred at rt overnight. The reaction was filtered through a short pad of Celite<sup>®</sup>. The organic layer was concentrated under reduced pressure (water bath at 30 °C), and purified by flash column chromatography (silica gel) to afford the product.

## Graphical Supporting Information for Sulfinimine Synthesis (General Procedure B)

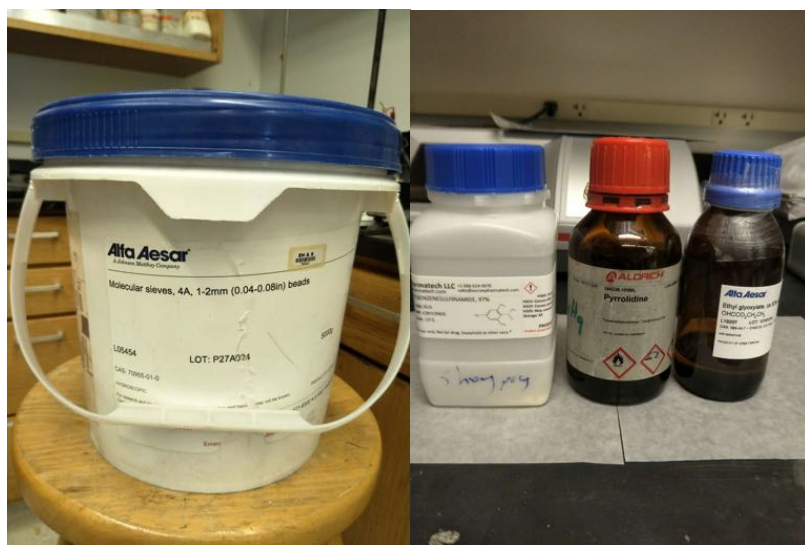

(Above) 4Å molecular sieves (Alfa Aesar), sulfinamide (Pharmatech), pyrrolidine (Sigma-Aldrich), ethyl glyoxylate (Alfa Aesar).

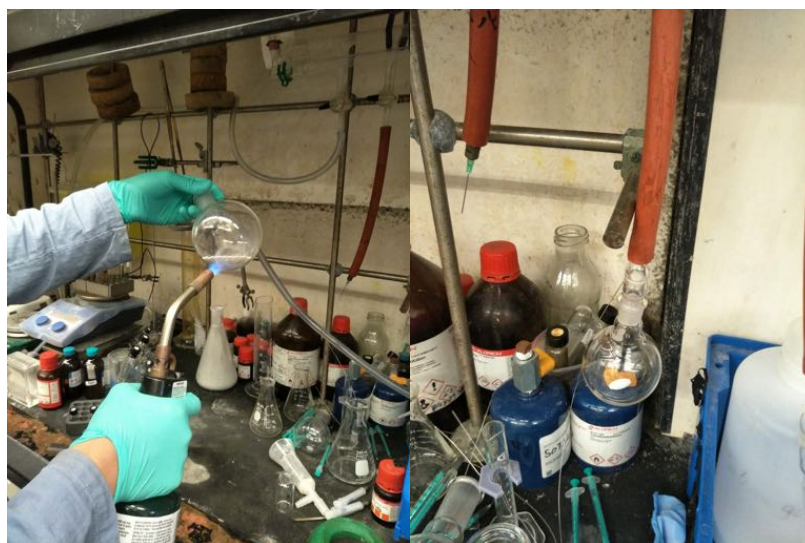

(Left) Activation of molecular sieves by flame-drying. (Right) The round-bottomed flask dried under vacuum.

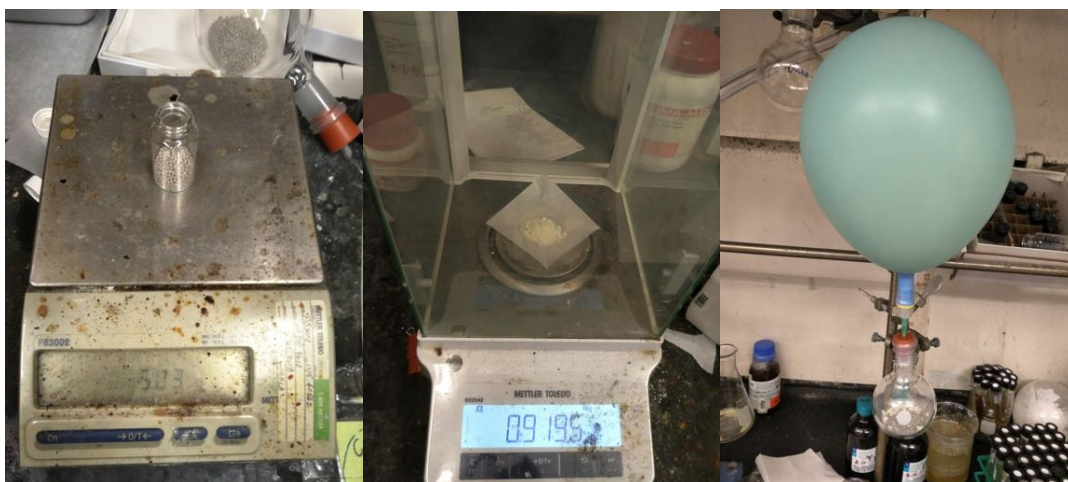

**(Left)** Molecular sieves. **(Center)** Sulfinamide. **(Right)** After addition of molecular sieves and sulfinamide, flask was placed under Ar atmosphere.

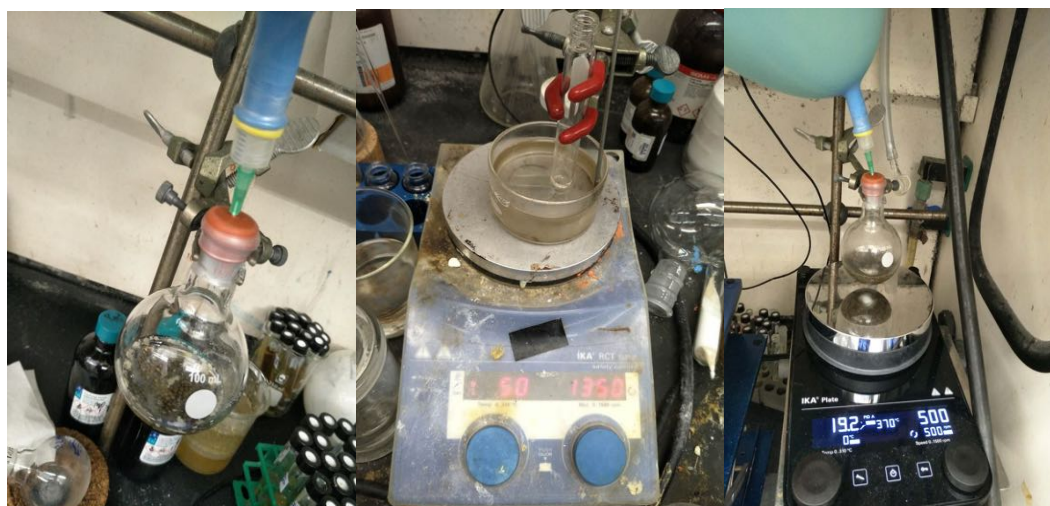

**(Left)** After addition of  $\text{CH}_2\text{Cl}_2$  (anhydrous). **(Center)** Ethyl glyoxylate was placed in an oil bath at  $50\text{ }^\circ\text{C}$  for 1 min. **(Right)** After addition of ethyl glyoxylate and pyrrolidine.

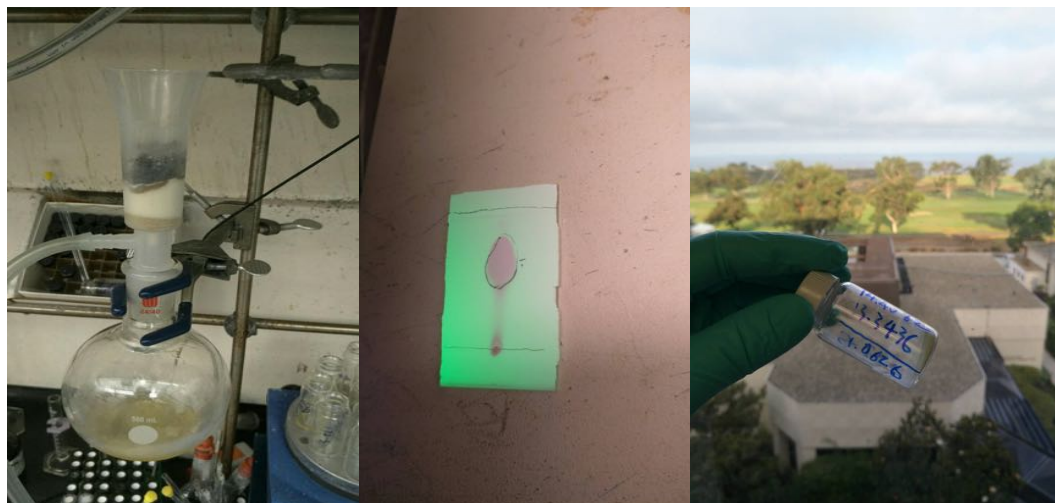

**(Left)** Filtration through a short pad of Celite<sup>®</sup>. **(Center)** TLC ( $\text{CH}_2\text{Cl}_2$ , UV) of the crude mixture (stirring at rt overnight), **(Right)** Product (white solid) after short column.

## Compound SI-1

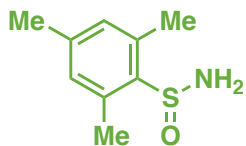

### *2,4,6-trimethylbenzenesulfonamide (SI-1).*

Enantiomers (*R*) and (*S*) of compound **SI-1** were provided to us by Bristol-Myers Squibb or directly purchased from Pharmatech.

Both enantiomers were obtained from a racemic mixture using the following SFC conditions:

#### Analytical Conditions:

|                     |                                                          |
|---------------------|----------------------------------------------------------|
| Analytical column   | Chiralpak AS-H (0.46×25 cm, 5 μm)                        |
| BPR pressure        | 100 bars                                                 |
| Temperature         | 40 °C                                                    |
| Flow rate           | 3.0 mL/min                                               |
| Mobile phase        | 70:30 CO <sub>2</sub> :MeOH                              |
| Detector wavelength | UV 200-400nm, MS positive ion mode, scan from mv 200-900 |

#### Preparative SFC Conditions:

|                     |                                                                      |
|---------------------|----------------------------------------------------------------------|
| Preparative column  | Chiralpak AS-H (5×25 cm, 5 μm, S/N 602171)                           |
| BPR pressure        | 100 bars                                                             |
| Temperature         | 40 °C                                                                |
| Flow rate           | 270 min/mL                                                           |
| Mobile phase        | 69:31 CO <sub>2</sub> :MeOH                                          |
| Detector wavelength | 219 nm                                                               |
| Separation program  | Sequence injection                                                   |
| Injection           | 2.5 mL with cycle time of 3.38 min                                   |
| Sample preparation  | 20 g/30 mL CH <sub>2</sub> Cl <sub>2</sub> + 95 mL MeOH, 160.0 mg/mL |

The enantiopurity of sulfonamide **SI-1** was verified through analytical SFC:

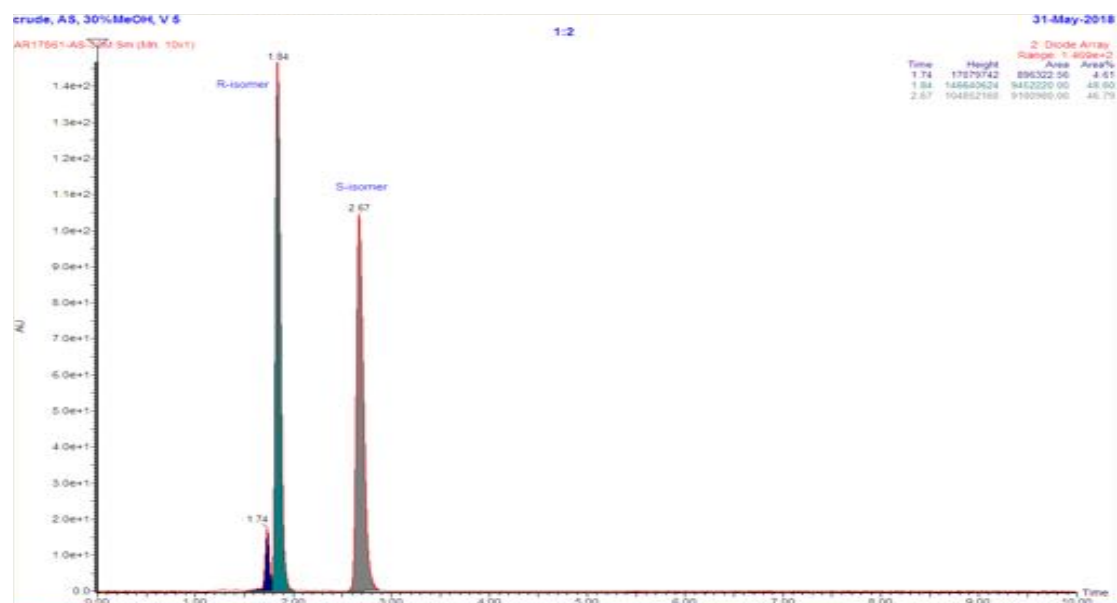

Racemic mixture of **SI-1**

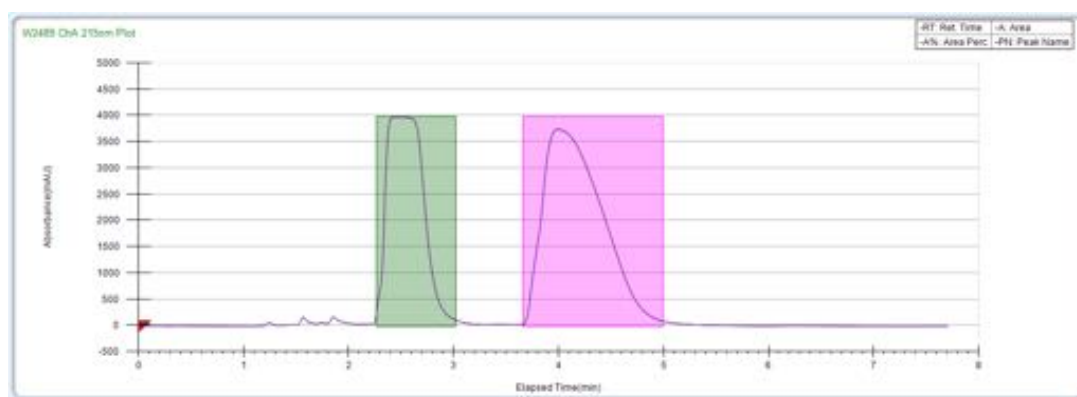

Typical Preparative SFC Chromatogram. (*R*)-enantiomer highlighted in green, (*S*) in pink.



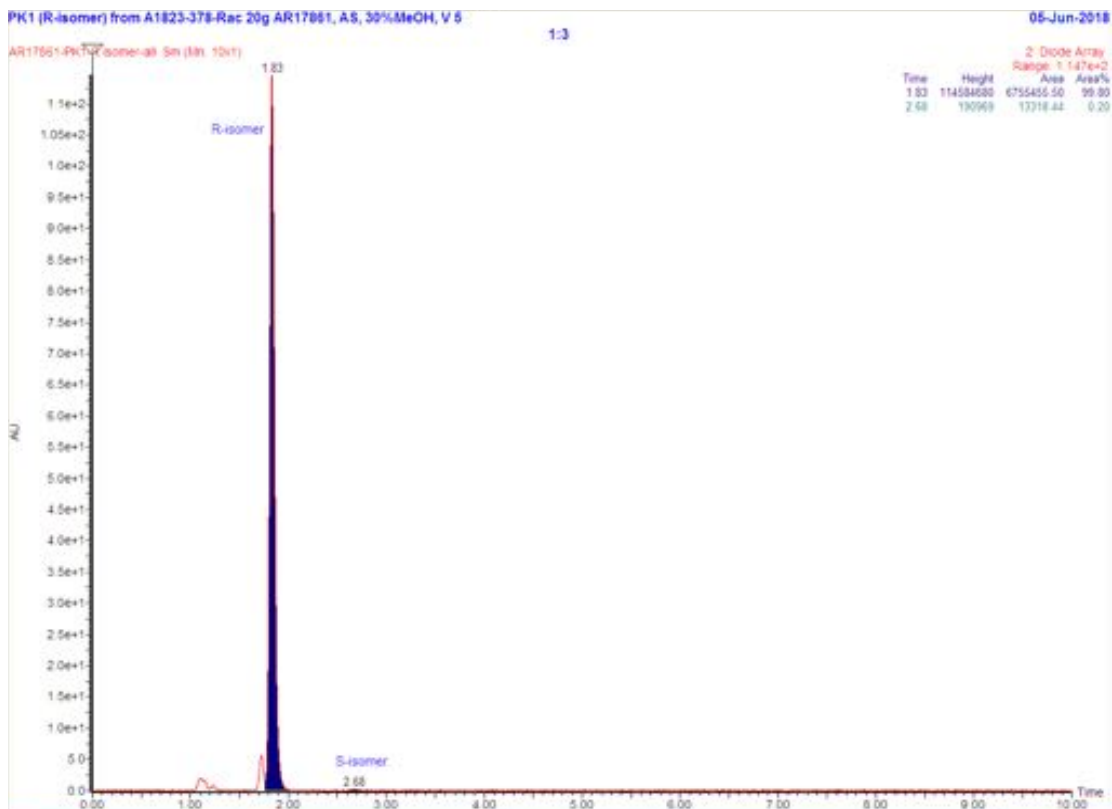

Analytical SFC Chromatogram of isolated (*R*)-enantiomer. *ee* = 99.6%

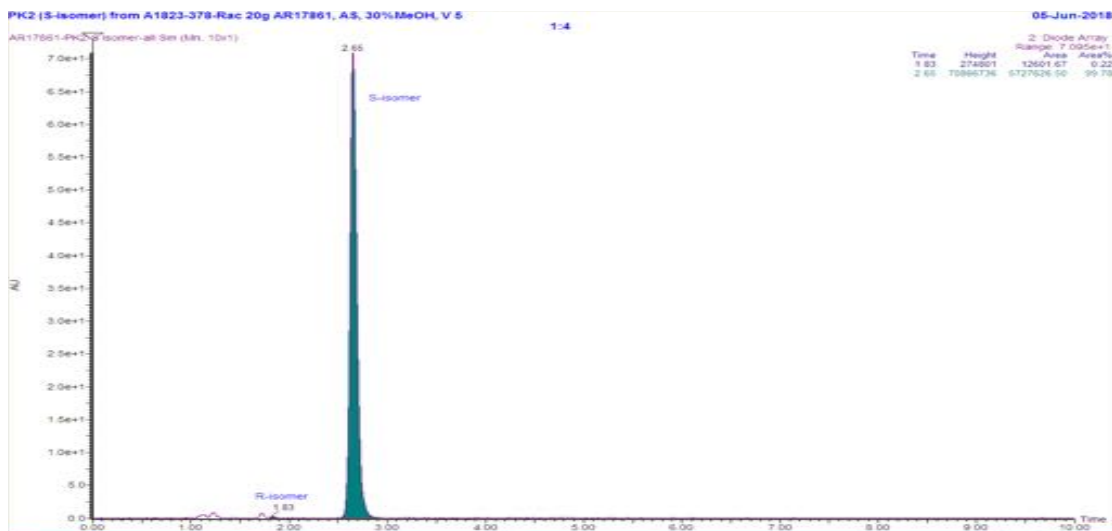

Analytical SFC Chromatogram of isolated (*S*)-enantiomer. *ee* = 99.6%

## Compound SI-2

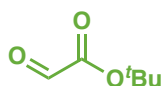

### *tert-butyl 2-oxoacetate (SI-2)*

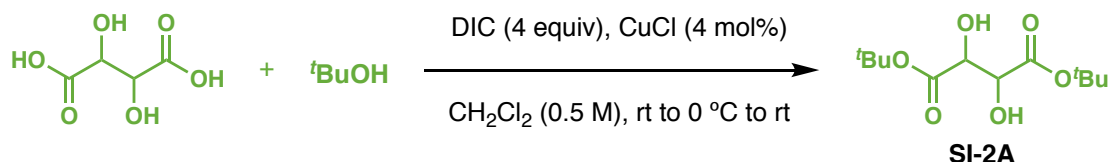

A dry round-bottomed flask was charged with anhydrous CuCl (39.6 mg, 0.4 mmol, 4 mol%). The flask was then evacuated and back-filled with argon (three times). Anhydrous *tert*-butanol (5.7 mL, 60 mmol, 6 equiv), DIC (6.2 mL, 40 mmol, 4 equiv), and anhydrous CH<sub>2</sub>Cl<sub>2</sub> (10 mL) were added through syringe. After stirring the mixture at rt for 13h, a solution of tartaric acid (1.50 g, 10 mmol, 1 equiv) in CH<sub>2</sub>Cl<sub>2</sub> (10 mL) was added at 0 °C. The mixture was allowed to warm up to rt and stirred for an additional 24h. The reaction was concentrated under reduced pressure (water bath at 30 °C), suspended in Et<sub>2</sub>O (50 mL) and filtered through a pad of Celite<sup>®</sup>. The filtrate was concentrated, and purified by flash column chromatography (silica gel, 4:1 hexanes:EtOAc) to afford the intermediate **SI-2A** as a white solid (446 mg, 17% yield).

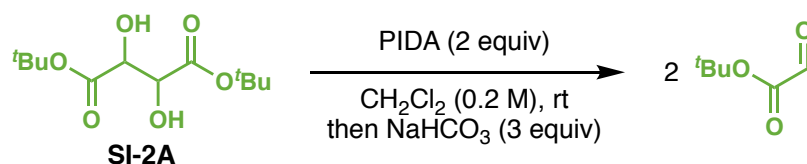

A round-bottomed flask was charged with intermediate **SI-2A** (393.5 mg, 1.5 mmol, 1 equiv), PIDA (966.3 mg, 3.0 mmol, 2 equiv) and CH<sub>2</sub>Cl<sub>2</sub> (7.5 mL, 0.2 M). After stirring the resulting solution for 1 h, NaHCO<sub>3</sub> (378.0 mg, 4.5 mmol, 3 equiv) was added to the mixture, which was stirred for an additional 30 min. Then, the insoluble salts were filtered off and the filtrate was concentrated under reduced pressure. Flash column chromatography (silica gel, gradient from 9:1 to 1:1 hexanes:EtOAc) afforded 270.1 mg (69%) of the title compound **SI-2**.

**Physical State:** colorless oil.

**<sup>1</sup>H NMR (600 MHz, CDCl<sub>3</sub>):** δ 9.25 (s, 1H), 1.52 (s, 9H) ppm.

Spectral data is in accordance with previous report.<sup>5</sup>

## General Procedure for Decarboxylative Amino Acid Synthesis (General Procedure C)

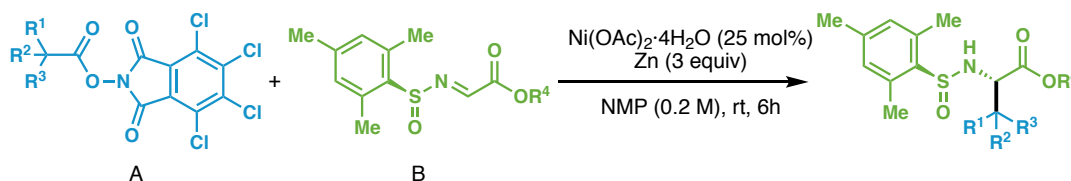

A culture tube was charged with TCNHPI redox-active ester **A** (0.1 mmol, 1 equiv), sulfinimine **B** (0.2 mmol, 2 equiv),  $\text{Ni}(\text{OAc})_2 \cdot 4\text{H}_2\text{O}$  (0.025 mmol, 25 mol%) and Zn (0.3 mmol, 3 equiv). The tube was then evacuated and backfilled with argon (three times). Anhydrous NMP (0.5 mL, 0.2 M) was added using a syringe. The mixture was stirred for 6 h at rt. The reaction mixture was diluted with EtOAc, washed with water, brine and dried over  $\text{MgSO}_4$ . Upon filtration, the organic layer was concentrated under reduced pressure (water bath at 30 °C), and purified by flash column chromatography (silica gel) or preparative TLC (pTLC) to provide the product.

### Procedure for 1.0 mmol scale:

A culture tube was charged with TCNHPI redox-active ester **A** (1.0 mmol), sulfinimine **B** (2.0 mmol),  $\text{Ni}(\text{OAc})_2 \cdot 4\text{H}_2\text{O}$  (0.25 mmol, 25 mol%), Zinc (3 mmol, 3 equiv). The tube was then evacuated and backfilled with argon (three times). Anhydrous NMP (5.0 mL, 0.2 M) was added using a syringe. The mixture was stirred overnight at rt. Then, the reaction mixture was diluted with EtOAc, washed with water, brine and dried over  $\text{MgSO}_4$ . Upon filtration, the organic layer was concentrated under reduced pressure (water bath at 30 °C), and purified by flash column chromatography (silica gel) provided the product.

**Graphical Supporting Information for Decarboxylative Amino Acid Synthesis  
(General Procedure C)**

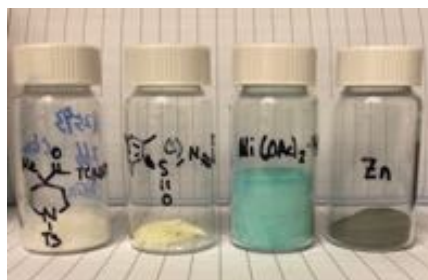

**(From left to right)** Redox-active ester **1**, sulfinimine **2**, Ni(OAc)<sub>2</sub>·4H<sub>2</sub>O, Zn.

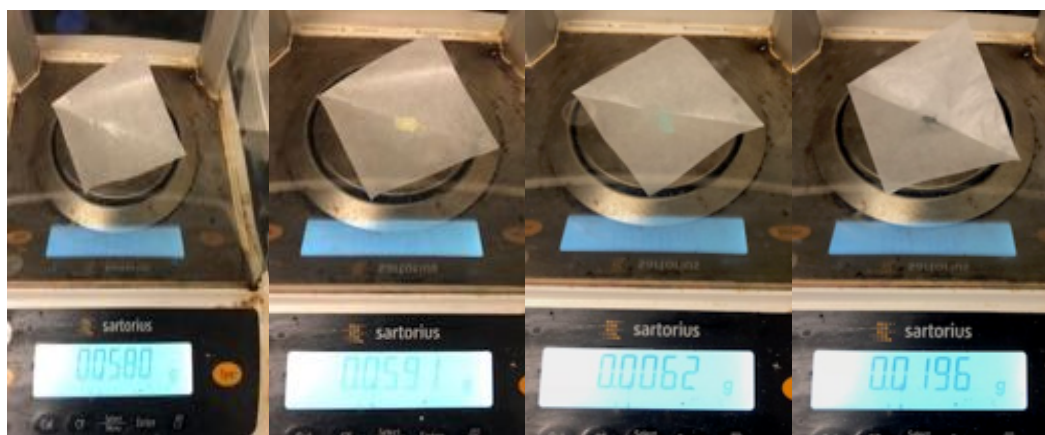

**(From left to right)** Redox-active ester **1**, sulfinimine **2**, Ni(OAc)<sub>2</sub>·4H<sub>2</sub>O, Zn.

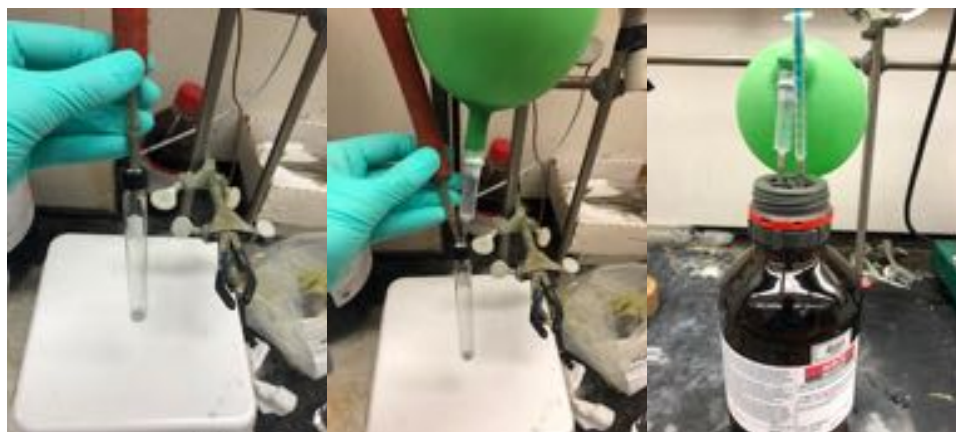

**(Left)** Culture tube was evacuated. **(Center)** Culture tube backfilled with Ar balloon. **(Right)** NMP (anhydrous).

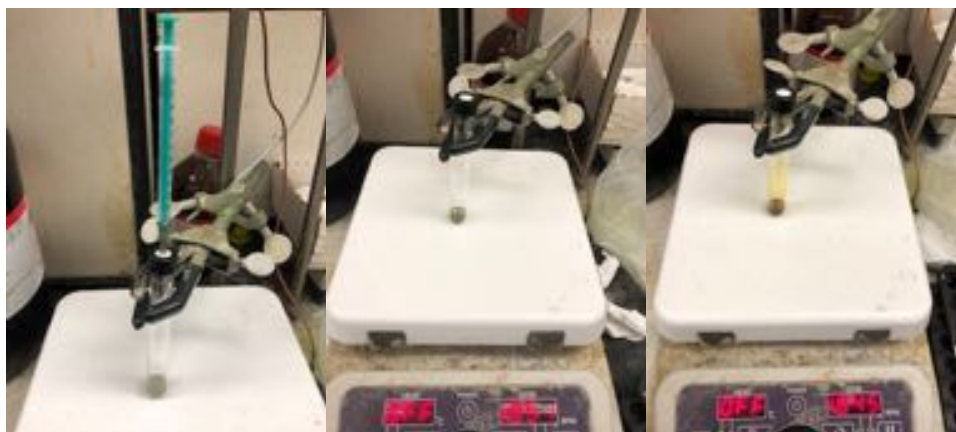

**(Left)** After addition of NMP. **(Center)** Crude mixture as reaction started. **(Right)** Crude mixture as reaction ended (6 h).

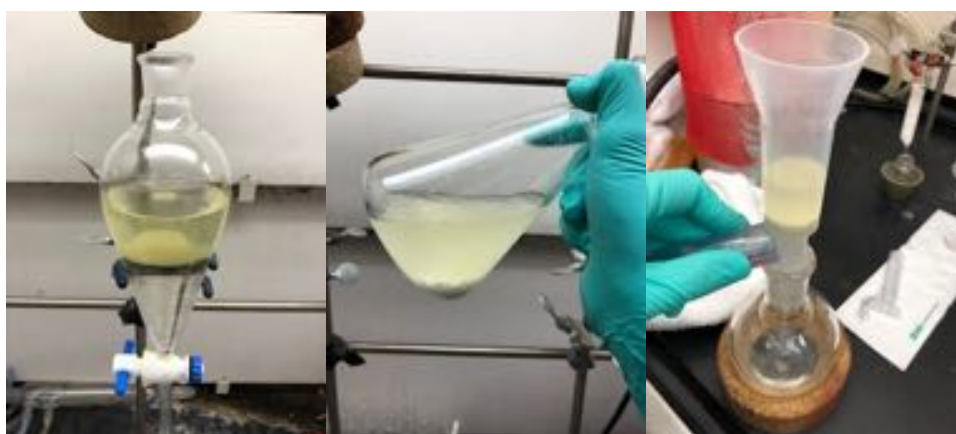

**(Left)** Crude mixture was diluted with EtOAc and extracted with water and brine. **(Center)** Organic layer was dried over  $\text{MgSO}_4$ . **(Right)** Organic layer was filtered.

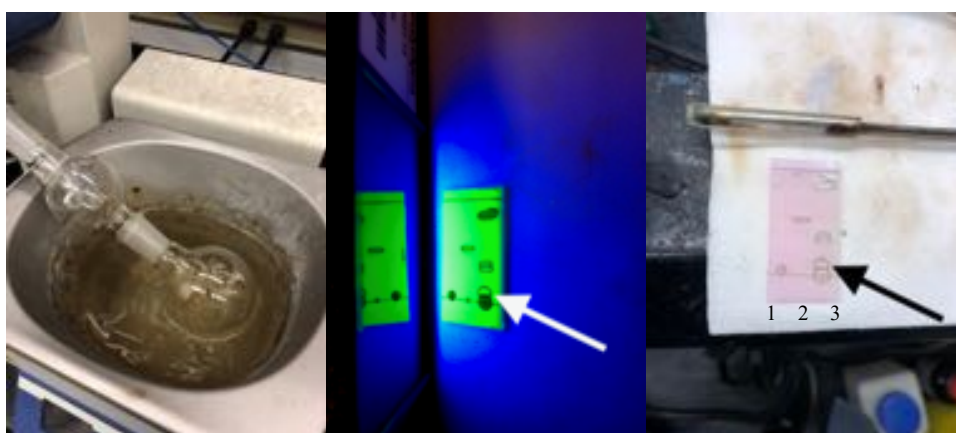

**(Left)** Organic layer was concentrated. **(Center)** TLC (hexanes 4:1 EtOAc, UV). Left lane: redox-active ester. Center lane: sulfinimine. Right lane: crude mixture. The

desired product is indicated with the white arrow. **(Right)** Same TLC, after  $\text{KMnO}_4$  staining. The desired product is indicated with the black arrow. Lane 1: redox-active ester **1**; Lane 2: sulfinimine **2**; Lane 3: crude mixture.

**General Procedure for One-Pot Activation of Carboxylic Acids in Amino Acid Synthesis (General Procedure D)**

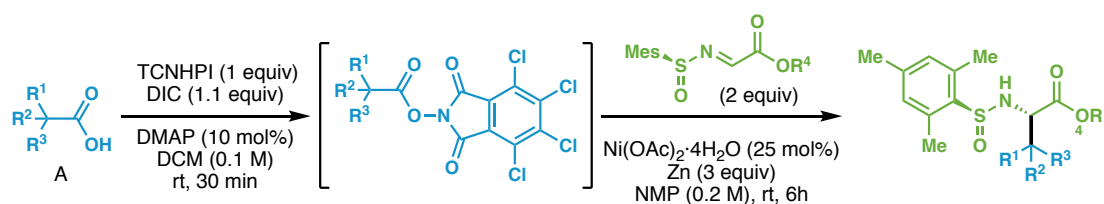

A culture tube was charged with carboxylic acid A (0.1 mmol, 1 equiv), TCNHPI (0.1 mmol, 1 equiv) and DMAP (0.01 mmol, 10 mol%). Then, CH<sub>2</sub>Cl<sub>2</sub> (1.0 mL, 0.1 M) and DIC (0.11 mmol, 1.1 equiv) were added. The mixture was stirred at rt and monitored by TLC (typical reaction time was 30 min). After consumption of all starting material, the solvent was removed under reduced pressure (water bath at 30 °C) and dried on a high-vacuum line for at least 5 minutes to remove residual CH<sub>2</sub>Cl<sub>2</sub>. The resulting crude RAE was then used in the amino acid synthesis in the same culture tube without further purification or isolation of the RAE (**General Procedure C**).



## General Procedure when Using Benzyl Bromide for Amino Acid Synthesis (General Procedure E)

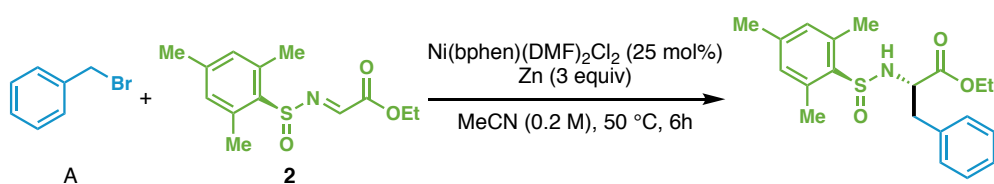

Preparation of [Ni] catalyst:

10g of NiCl<sub>2</sub>•6H<sub>2</sub>O and 14.27g bathophenanthroline were dissolved in DMF (200 mL). The mixture was heated to 75 °C to dissolve all the reaction components. Then, the solution was filtered while hot. Upon cooling, crystals form. The filtrate was stirred for an additional 3 days, after which it was filtered. The obtained crystals were dried in a vacuum oven at 90 °C, affording the [Ni] catalyst in 90% yield.

A culture tube was charged with benzyl bromide A (0.1 mmol, 1 equiv) (if solid), sulfinimine 2 (0.2 mmol, 2 equiv), Ni(bphen)(DMF)<sub>2</sub>Cl<sub>2</sub> (0.025 mmol, 25 mol%) and Zn (0.3 mmol, 3 equiv). The tube was then evacuated and backfilled with argon (three times). Anhydrous MeCN (0.5 mL, 0.2 M) and benzyl bromide A (0.1 mmol, 1 equiv) (if liquid) were added using a syringe. The mixture was stirred for 6 h at 50 °C. The reaction mixture was diluted with EtOAc, washed with water, brine and dried over MgSO<sub>4</sub>. Upon filtration, the organic layer was concentrated under reduced pressure (water bath at 30 °C), and purified by flash column chromatography (silica gel) or preparative TLC (pTLC) to afford the product.

## **Troubleshooting: Frequently Asked Questions**

### **Part I. Redox-Active Ester Synthesis**

For questions regarding the synthesis, purification, characterization, stability and storage of redox-active esters, please see our previous papers<sup>1-3</sup> for fully-detailed answers.

### **Part II. Preparation of Sulfinimine Reagents**

#### **Question 1:**

How can I monitor my reaction?

#### **Answer:**

We monitor the reaction by TLC (and appropriate UV visualization). <sup>1</sup>H NMR can also be used by taking an aliquot out of the reaction.

#### **Question 2:**

Is it necessary to run the reaction for an overnight period (> 8 hours), or can I stop it sooner?

#### **Answer:**

The reaction can be stopped sooner if there is complete consumption of the starting materials (aldehyde and sulfinamide). The best way to determine if the starting material has been completely consumed is by TLC analysis.

#### **Question 3:**

Do I need to run this reaction under inert atmosphere?

#### **Answer:**

It is not necessary. Atmospheric air does not alter the outcome of the reaction.

However, precautions must be taken to ensure anhydrous conditions in the reaction medium. Flame-drying the flask or storing it in the oven before running the reaction is necessary. Molecular sieves should also be activated with heating-vacuum cycles.

**Question 4:**

How do I work up the reaction?

**Answer:**

Aqueous work up is not required. Simple filtration through a short pad of Celite® is enough to remove the molecular sieves.

**Question 5:**

How do I purify my product?

**Answer:**

We use flash column chromatography through silica gel, using either CH<sub>2</sub>Cl<sub>2</sub> or a 4:1 mixture of hexanes:EtOAc as eluent.

**Question 6:**

How do I store my product?

**Answer:**

Sulfinimines are susceptible to hydrolysis. Therefore, we recommend storing them at low temperature (~4 °C) to avoid decomposition.

**Question 7:**

What are general ways of making sulfinimines?

**Answer:**

Sulfinimines are typically prepared through condensation of aldehyde and sulfinamide. The aldehyde is normally activated by a Lewis acid, such as Ti(OEt)<sub>4</sub>, or by generating an iminium intermediate (pyrrolidine activation). See **General Procedure**

**B** for more details on the latter approach.

### **Part III. Decarboxylative Amino Acid Synthesis**

#### **Question 1:**

How can I monitor the reaction?

#### **Answer:**

We monitor the reaction by TLC (and appropriate staining and UV visualization).

#### **Question 2:**

It is not convenient for me to stop the reaction after 6 hours. Can I leave it longer?

#### **Answer:**

The reaction can be left overnight if needed. In fact, when running larger scale reactions (>1 mmol), we recommend longer reaction times to ensure maximum product formation.

#### **Question 3:**

Do I need a glovebox to run the reaction?

#### **Answer:**

We do not set up the reaction in a glovebox. The reaction can be set up and run in a glovebox, but this is not necessary as long as you have access to some inert gas (nitrogen or argon) since it is recommended to run the reaction under inert atmosphere.

#### **Question 4:**

Are there any indicative color changes during the reaction?

#### **Answer:**

We often observe that the reaction mixture changes from dark green to dark red/brown

during the course of the reaction. However, this color change is not necessarily indicative of a successful reaction.

**Question 5:**

How do I work up the reaction?

**Answer:**

We dilute the reaction with EtOAc and extract initially with water. If we observe the formation of an emulsion, adding an aqueous salt solution such as 5-10% LiCl, NaCl<sub>(sat.)</sub> or NH<sub>4</sub>Cl<sub>(sat.)</sub> usually improves phase separation. Upon extraction, the aqueous layer might adopt an oily form. If that is the case, we recommend back-extraction with EtOAc to avoid any product loss through the workup. We then extract the organic layer(s) with brine, dry over MgSO<sub>4</sub>, filter, and concentrate under reduced pressure. The crude product often contains solids that are phthalimide byproducts, but these are easily removed by column chromatography.

**Question 6:**

How do I purify my product?

**Answer:**

We use both silica gel flash column chromatography and PTLC. In the case of column chromatography, we recommend using a gradient with increasing polarity to ensure optimal separation and maximum yield.

**Question 7:**

How do I store my product?

**Answer:**

Sulfenamides are generally bench-stable products. No additional precautions are required for product storage.

**Question 8:**

I think my redox-active ester is unstable. Can I still run the reaction?

**Answer:**

The *in situ* activation procedure (**General Procedure D**) allows for potentially unstable redox-active esters to be used in the decarboxylative amino acid synthesis and often affords the product in comparable yields to reactions run with the isolated redox-active ester. To test the viability of the coupling partner, we recommend running the reaction using this *in situ* activation protocol. In our experience, there have been no examples where an isolated redox-active ester affords product but *in situ* activation does not result in product.

**Question 9:**

I obtained the product, but the yield is not satisfactory for my purposes. What do you recommend I try to optimize the reaction?

**Answer:**

For optimization, we recommend the following:

1. Try adding more equivalents of sulfinimine.
2. Check the purity of your redox-active ester. If you have reason to believe it is not pure, recrystallize with CH<sub>2</sub>Cl<sub>2</sub>/MeOH.
3. Try using a higher catalyst [Ni(OAc)<sub>2</sub>•4H<sub>2</sub>O] loading.
4. Try adding more equivalents of reductant (Zn).
5. Try heating the reaction (40-60 °C).

**Part IV. One-pot Activation of Carboxylic Acids for Decarboxylative Amino Acid Synthesis****Question 1:**

Do I have to use DIC? And DMAP?

**Answer:**

Both DIC and DCC are effective for the transformation, and other coupling reagents such as EDCI should work as well. DMAP accelerates the reaction time, but if your substrate is base-sensitive, it is not strictly necessary for the carboxylic acid activation.

**Question 2:**

What solvents are best for the one-pot activation procedure?

**Answer:**

CH<sub>2</sub>Cl<sub>2</sub> was found to be the optimal solvent for the one-pot activation procedure.

**Question 3:**

Do I need to remove CH<sub>2</sub>Cl<sub>2</sub> before running the decarboxylative amino acid synthesis?

**Answer:**

Significant (solvent) quantities of CH<sub>2</sub>Cl<sub>2</sub> inhibit product formation in the decarboxylative reaction. The majority of the solvent was removed on a rotary evaporator before conducting the second operation. We did not check for the complete removal of CH<sub>2</sub>Cl<sub>2</sub> by <sup>1</sup>H NMR before performing the second operation in the same reaction tube.

## Experimental Procedures and Characterization Data for Acids

### Compound SI-3

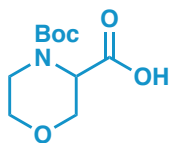

#### 4-(tert-butoxycarbonyl)morpholine-3-carboxylic acid (SI-3)

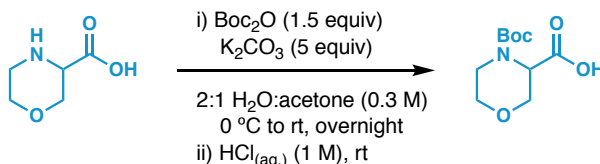

A scintillation vial was charged with morpholine-3-carboxylic acid (0.5 mmol, 1 equiv) and  $\text{K}_2\text{CO}_3$  (2.5 mmol, 5 equiv). The solids were dissolved in a 2:1 mixture of water:acetone (1:0.5 mL, 0.3 M), and the resulting solution was cooled to 0 °C with an ice bath. Then,  $\text{Boc}_2\text{O}$  (0.75 mmol, 1.5 equiv) was added, and the reaction mixture was allowed to warm to rt. After stirring overnight, the reaction was quenched with water (5 mL) and extracted with  $\text{Et}_2\text{O}$  (2x10 mL). The aqueous phase was then treated with HCl (1 M, 20 mL), followed by extraction with  $\text{CH}_2\text{Cl}_2$  (2x20 mL). The combined organic layers were washed with water and brine, dried over  $\text{MgSO}_4$  and filtered. Concentration under reduced pressure (water bath at 30 °C) afforded the product **SI-3** (39.1 mg, 34% yield).

**Physical State:** white solid.

**$^1\text{H}$  NMR (600 MHz,  $\text{CD}_3\text{OD}$ ):**  $\delta$  4.45 (d,  $J$  = 3.8 Hz, 1H minor rotamer), 4.41 (d,  $J$  = 3.9 Hz, 1H major rotamer), 4.35 (d,  $J$  = 11.7 Hz, 1H minor), 4.30 (d,  $J$  = 11.7 Hz, 1H major), 3.88 (dd,  $J$  = 11.6, 3.9 Hz, 1H major), 3.81 (dd,  $J$  = 11.4, 3.8 Hz, 1H minor), 3.66 (td,  $J$  = 12.2, 3.5 Hz, 4H), 3.51 – 3.41 (m, 2H), 3.17 (td,  $J$  = 12.8, 4.0 Hz, 1H major), 1.48 (s, 9H minor), 1.44 (s, 9H major) ppm (2 rotamers are reported).

*1H from one the minor rotamer was obscured by the residual solvent signal at 3.31 ppm.*

**$^{13}\text{C}$  NMR (151 MHz,  $\text{CD}_3\text{OD}$ ):**  $\delta$  173.3, 173.2, 157.5, 157.4, 81.9 (2C), 68.8, 68.4, 67.6, 67.4, 56.7, 55.3, 43.1, 41.9, 28.6, 28.5 ppm (2 rotamers are reported).



Spectral data is in accordance with previous reports.<sup>6</sup>

### Compound SI-4

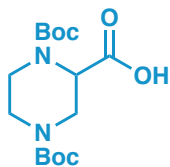

#### *1,4-bis(tert-butoxycarbonyl)piperazine-2-carboxylic acid (SI-4)*

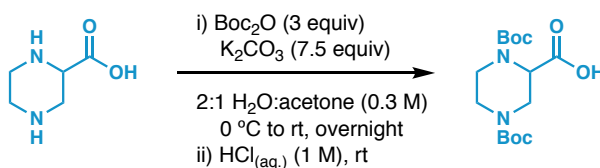

Similar procedure as that for compound **SI-3** was utilized with the following modifications;  $\text{Boc}_2\text{O}$  (3 equiv) and  $\text{K}_2\text{CO}_3$  (7.5 equiv), to obtain **SI-4** (115.6 mg, 70% yield).

**Physical State:** white solid.

**$^1\text{H}$  NMR (600 MHz,  $\text{CD}_3\text{OD}$ ):**  $\delta$  4.63 – 4.47 (m, 2H), 3.97 (br s, 1H), 3.79 (t,  $J$  = 12.4 Hz, 1H), 3.29 – 3.09 (m, 2H), 2.86 (br s, 1H), 1.49 – 1.42 (m, 18H) ppm.

**$^{13}\text{C}$  NMR (151 MHz,  $\text{CDCl}_3$ ):**  $\delta$  173.4, 173.2, 157.4, 157.2, 156.0 (2C), 82.0, 81.6, 56.3 (2C), 54.9 (2C), 46.1, 45.7, 44.7, 43.5, 42.5 (2C), 41.3 (2C), 28.6, 28.5 ppm (2 rotamers are reported).

Spectral data is in accordance with previous reports.<sup>7</sup>

### Compound SI-5

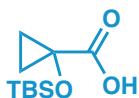

#### *1-((tert-butyldimethylsilyl)oxy)cyclopropane-1-carboxylic acid (SI-5)*

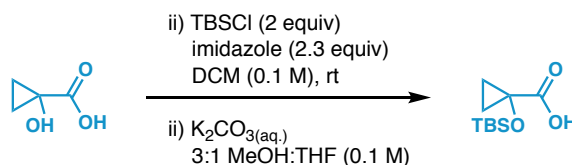

A scintillation vial was charged with 1-hydroxycyclopropane-1-carboxylic acid (0.5 mmol, 1 equiv) and imidazole (1.15 mmol, 2.3 equiv). The solids were dissolved in a  $\text{CH}_2\text{Cl}_2$  (5 mL, 0.1 M), and TBSCl (1.0 mmol, 2 equiv) was added. After stirring overnight, the reaction mixture was concentrated under reduced pressure (water bath at 30 °C). The crude mixture was diluted in a 3:1 mixture of MeOH:THF (3:1 mL, 0.1 M). An aqueous solution of  $\text{K}_2\text{CO}_3$  (0.72 M, 2 mL) was added and the mixture was stirred for 1 h. After concentrating to remove organic solvents, the crude was diluted with brine (5 mL), and acidified gently with a half-saturated aqueous solution of citric acid (pH~3). The mixture was extracted with  $\text{Et}_2\text{O}$  (2x20 mL). The combined organic layers were washed with brine, dried over  $\text{MgSO}_4$ , filtered and concentrated, affording the title compound **SI-5** (colorless oil, 83.8 mg, 77% yield). The crude acid was used without further purification for the synthesis of RAE **SI-8**.

## Experimental Procedures and Characterization Data for Redox-Active Esters

### Compound SI-6

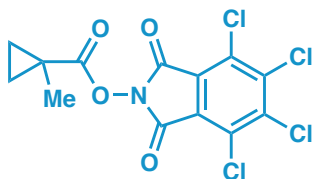

### *4,5,6,7-tetrachloro-1,3-dioxoisindolin-2-yl 1-methylcyclopropane-1-carboxylate (SI-6)*

Following the **General Procedure A** on 0.20 mmol scale at rt. Purification by column chromatography (silica gel, CH<sub>2</sub>Cl<sub>2</sub>) afforded 70.0 mg (91%) of the title compound **SI-6**.

**Physical State:** white solid.

**m.p.:** 163 – 165 °C.

**R<sub>f</sub>** = 0.92 (CH<sub>2</sub>Cl<sub>2</sub>).

**<sup>1</sup>H NMR (500 MHz, CDCl<sub>3</sub>):** δ 1.57 (dd, *J* = 7.4, 4.5 Hz, 2H), 1.47 (s, 3H), 0.99 (dd, *J* = 7.2, 4.5 Hz, 2H) ppm.

**<sup>13</sup>C NMR (151 MHz, CDCl<sub>3</sub>):** δ 171.7, 157.8, 141.1, 130.5, 124.9, 18.9, 18.9, 17.4 ppm.

The desired mass for HRMS was not observed.

### Compound SI-7

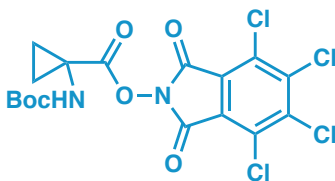

### *4,5,6,7-tetrachloro-1,3-dioxoisindolin-2-yl*

### *1-((tert-butoxycarbonyl)amino)cyclopropane-1-carboxylate (SI-7)*

Following the **General Procedure A** on 0.20 mmol scale at rt. Purification by column chromatography (silica gel, 20:1 CH<sub>2</sub>Cl<sub>2</sub>:Et<sub>2</sub>O) afforded 75.5 mg (78%) of the title compound **SI-7**.

**Physical State:** yellow solid.

**m.p.:** >140 °C.

**R<sub>f</sub>** = 0.78 (20:1 CH<sub>2</sub>Cl<sub>2</sub>:Et<sub>2</sub>O).

**<sup>1</sup>H NMR (600 MHz, CDCl<sub>3</sub>):** δ 5.30 (s, 1H), 5.18 (s, 1H), 1.82 (s, 2H), 1.78 (s, 2H), 1.67 (s, 2H), 1.53 (s, 9H), 1.46 (s, 11H) ppm (2 rotamers reported).

**<sup>13</sup>C NMR (151 MHz, CDCl<sub>3</sub>):** δ 169.7 (2C), 157.4 (2C), 155.5 (2C), 141.1 (2C), 130.6 (2C), 124.8 (2C), 81.8, 80.8, 33.9, 33.2, 28.3 (2C), 21.1, 20.0 ppm (2 rotamers reported).

**HRMS (ESI-TOF):** calc'd for C<sub>17</sub>H<sub>15</sub>Cl<sub>4</sub>N<sub>2</sub>O<sub>6</sub> [M+H]<sup>+</sup>: 482.9679, found: 482.9679.

### Compound SI-8

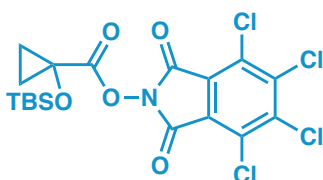

#### *4,5,6,7-tetrachloro-1,3-dioxoindolin-2-yl*

#### *1-((tert-butyl(dimethyl)silyloxy)cyclopropane-1-carboxylate (SI-8)*

Following the **General Procedure A** on 0.20 mmol scale at rt. Purification by column chromatography (silica gel, CH<sub>2</sub>Cl<sub>2</sub>) afforded 61.9 mg (62%) of the title compound **SI-8**.

**Physical State:** pale yellow solid.

**m.p.:** 118 – 119 °C.

**R<sub>f</sub>** = 0.92 (CH<sub>2</sub>Cl<sub>2</sub>).

**<sup>1</sup>H NMR (600 MHz, CDCl<sub>3</sub>):** δ 1.62 (dd, *J* = 8.6, 5.4 Hz, 2H), 1.36 (dd, *J* = 8.0, 5.3 Hz, 2H), 0.89 (s, 9H), 0.22 (s, 6H) ppm.

**<sup>13</sup>C NMR (151 MHz, CDCl<sub>3</sub>):** δ 171.0, 157.6, 141.2, 130.6, 124.9, 54.6, 25.7, 19.9, 18.0, -4.2 ppm.

The desired mass for HRMS was not observed.

### Compound SI-9

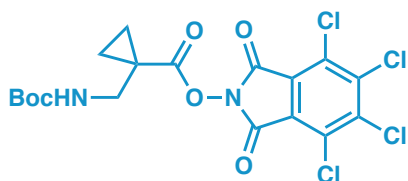

*4,5,6,7-tetrachloro-1,3-dioxoisindolin-2-yl*

*1-(((tert-butoxycarbonyl)amino)methyl)cyclopropane-1-carboxylate (SI-9)*

Following **General Procedure A** on 3.00 mmol scale. Purification by column chromatography (silica gel, gradient from CH<sub>2</sub>Cl<sub>2</sub> to 10:1 CH<sub>2</sub>Cl<sub>2</sub>:Et<sub>2</sub>O) afforded 1.07 g (72%) of the title compound **SI-9**.

**Physical State:** white solid.

**m.p.:** 149 – 150 °C.

**R<sub>f</sub>** = 0.58 (CH<sub>2</sub>Cl<sub>2</sub>).

**<sup>1</sup>H NMR (500 MHz, CDCl<sub>3</sub>):** δ 5.17 (t, *J* = 6.5 Hz, 1H), 3.44 (d, *J* = 6.5 Hz, 2H), 1.60 (q, *J* = 4.6 Hz, 2H), 1.45 (s, 9H), 1.31 (q, *J* = 4.6 Hz, 2H) ppm.

**<sup>13</sup>C NMR (151 MHz, CDCl<sub>3</sub>):** δ 170.9, 157.7, 156.3, 141.3, 130.6, 124.8, 79.8, 43.5, 28.5, 24.2, 16.7 ppm.

**HRMS (ESI-TOF):** calc'd for C<sub>18</sub>H<sub>16</sub>Cl<sub>4</sub>N<sub>2</sub>NaO<sub>6</sub> [M+Na]<sup>+</sup>: 518.9655, found: 518.9665.

### Compound SI-10

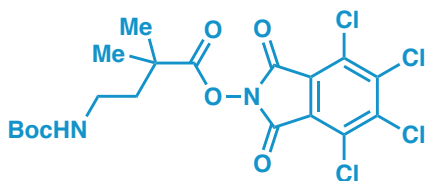

*4,5,6,7-tetrachloro-1,3-dioxoisindolin-2-yl*

*4-(((tert-butoxycarbonyl)amino)-2,2-dimethylbutanoate (SI-10)*

Following **General Procedure A** on 5.00 mmol scale. Purification by column (silica gel, gradient from CH<sub>2</sub>Cl<sub>2</sub> to 10:1 CH<sub>2</sub>Cl<sub>2</sub>:Et<sub>2</sub>O) afforded 2.15 g (84%) of the title compound **SI-10**.

**Physical State:** white solid.

**m.p.:** 123 – 124 °C.

**R<sub>f</sub>** = 0.58 (CH<sub>2</sub>Cl<sub>2</sub>).

**<sup>1</sup>H NMR (400 MHz, CDCl<sub>3</sub>):** δ 4.89 (br s, 1H), 3.30 (q, *J* = 7.0 Hz, 2H), 1.98 (t, *J* = 7.6 Hz, 2H), 1.42 (s, 15H) ppm.

**<sup>13</sup>C NMR (151 MHz, CDCl<sub>3</sub>):** δ 173.1, 157.7, 156.0, 141.1, 130.5, 124.8, 79.3, 40.8, 40.2, 36.8, 28.5, 25.2 ppm.

**HRMS (ESI-TOF):** calc'd for C<sub>19</sub>H<sub>20</sub>Cl<sub>4</sub>N<sub>2</sub>NaO<sub>6</sub> [M+Na]<sup>+</sup>: 534.9968, found: 534.9973.

### Compound SI-11

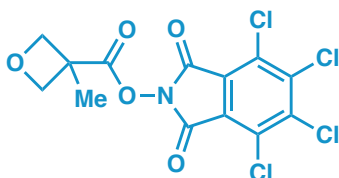

#### *4,5,6,7-tetrachloro-1,3-dioxoisindolin-2-yl 3-methyloxetane-3-carboxylate (SI-11)*

Following the **General Procedure A** on 0.80 mmol scale at rt. Purification by column chromatography (silica gel, CH<sub>2</sub>Cl<sub>2</sub>) afforded 212 mg (66%) of the title compound **SI-11**.

**Physical State:** white solid.

**R<sub>f</sub>** = 0.68 (CH<sub>2</sub>Cl<sub>2</sub>).

**<sup>1</sup>H NMR (400 MHz, CDCl<sub>3</sub>):** δ 5.15 (d, *J* = 6.3 Hz, 2H), 4.55 (d, *J* = 6.3 Hz, 2H), 1.84 (s, 3H) ppm.

**<sup>13</sup>C NMR (101 MHz, CDCl<sub>3</sub>):** δ 170.2, 157.6, 141.4, 130.8, 124.9, 79.0, 43.5, 21.5 ppm.

**HRMS (ESI-TOF):** calc'd for C<sub>13</sub>H<sub>8</sub>Cl<sub>4</sub>NO<sub>5</sub> [M+H]<sup>+</sup>: 397.9151, found: 397.9136.

### Compound SI-12

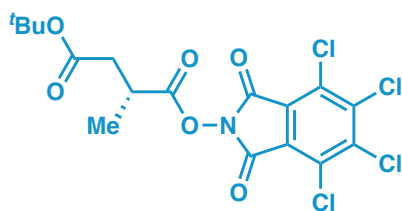

#### *4-(tert-butyl) 1-(4,5,6,7-tetrachloro-1,3-dioxoisindolin-2-yl) (S)-2-methylsuccinate (SI-12)*

Following **General Procedure A** on 3.00 mmol scale. Purification by column chromatography (silica gel, CH<sub>2</sub>Cl<sub>2</sub>) afforded 1.08 g (77%) of the title compound **SI-12**.

**Physical State:** white solid.

**m.p.:** 94 °C.

**R<sub>f</sub>** = 0.81 (CH<sub>2</sub>Cl<sub>2</sub>).

**<sup>1</sup>H NMR (600 MHz, CDCl<sub>3</sub>):** δ 3.27 (h, *J* = 7.2 Hz, 1H), 2.79 (dd, *J* = 16.7, 7.5 Hz, 1H), 2.50 (dd, *J* = 16.8, 6.6 Hz, 1H), 1.47 (s, 9H), 1.42 (d, *J* = 7.1 Hz, 3H) ppm.

**<sup>13</sup>C NMR (151 MHz, CDCl<sub>3</sub>):** δ 171.5, 169.7, 157.6, 141.1, 130.6, 124.9, 81.8, 38.6, 34.0, 28.1, 17.0 ppm.

**HRMS (ESI-TOF):** calc'd for C<sub>17</sub>H<sub>15</sub>Cl<sub>4</sub>NNaO<sub>6</sub> [M+Na]<sup>+</sup>: 491.9546, found: 491.9548.

**[α]<sub>D</sub><sup>20</sup>** = -8.9 (*c* = 1.0, CH<sub>2</sub>Cl<sub>2</sub>).

### Compound SI-13

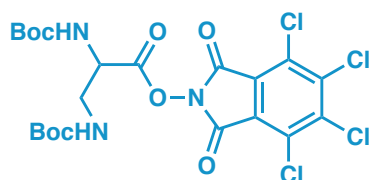

#### *4,5,6,7-tetrachloro-1,3-dioxoisindolin-2-yl*

#### *2,3-bis((tert-butoxycarbonyl)amino)propanoate (SI-13)*

Following the **General Procedure A** on 0.20 mmol scale at rt. Purification by column chromatography (silica gel, 20:1 CH<sub>2</sub>Cl<sub>2</sub>:Et<sub>2</sub>O) afforded 68.8 mg (59%) of the title

compound **SI-13**.

**Physical State:** pale yellow solid.

**m.p.:** 166 – 170 °C.

$R_f$  = 0.70 (20:1 CH<sub>2</sub>Cl<sub>2</sub>:Et<sub>2</sub>O).

**<sup>1</sup>H NMR (600 MHz, CDCl<sub>3</sub>):** δ 5.99 (br s, 1H minor rotamer), 5.90 (br s, 1H major rotamer), 5.36 (br s, 1H minor), 5.31 (br s, 1H major), 4.77 (br s, 1H major), 4.55 (br s, 1H minor), 3.82 – 3.80 (m, 1H), 3.69 – 3.60 (m, 1H), 1.48 – 1.44 (m, 18H) ppm (2 rotamers reported).

**<sup>13</sup>C NMR (151 MHz, CDCl<sub>3</sub>):** δ 167.4 (2C), 157.1 (2C), 157.0 (2C), 155.3 (2C), 141.3 (2C), 130.7 (2C), 124.7 (2C), 80.8, 80.6, 54.0 (2C), 42.4 (2C), 28.4 (2C) ppm (2 rotamers reported).

**HRMS (ESI-TOF):** calc'd for C<sub>21</sub>H<sub>23</sub>Cl<sub>4</sub>N<sub>3</sub>NaO<sub>8</sub> [M+Na]<sup>+</sup>: 608.0131, found: 608.0136.

### Compound SI-14

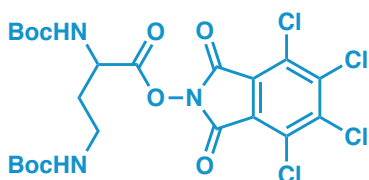

#### *4,5,6,7-tetrachloro-1,3-dioxoisindolin-2-yl 2-cyclobutylacetate (SI-14)*

Following the **General Procedure A** on 0.20 mmol scale at rt. Purification by column chromatography (silica gel, CH<sub>2</sub>Cl<sub>2</sub>) afforded 62.8 mg (79%) of the title compound **SI-14**.

**Physical State:** orange solid.

**m.p.:** >200 °C.

$R_f$  = 0.54 (20:1 CH<sub>2</sub>Cl<sub>2</sub>:Et<sub>2</sub>O).

**<sup>1</sup>H NMR (500 MHz, CDCl<sub>3</sub>):** δ 5.56 – 5.48 (m, 1H), 5.16 (br s, 1H), 4.90 – 4.83 (m, 1H), 3.56 (br s, 1H), 3.18 – 3.13 (m, 1H), 2.25 – 2.18 (m, 1H), 2.16 – 2.08 (m, 1H), 1.47 (s, 9H), 1.42 (s, 9H) ppm.



<sup>13</sup>C NMR (151 MHz, CD<sub>3</sub>OD): δ 174.6, 161.3, 158.4, 158.1, 140.5, 130.3, 127.0, 80.1, 80.1, 52.7, 37.9, 28.8, 28.7, 23.5 ppm.

HRMS (ESI-TOF): calc'd for C<sub>22</sub>H<sub>25</sub>Cl<sub>4</sub>N<sub>3</sub>NaO<sub>8</sub> [M+H]<sup>+</sup>: 622.0288, found: 622.0305.

### Compound SI-15

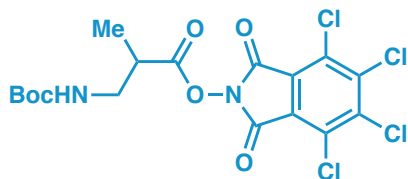

*4,5,6,7-tetrachloro-1,3-dioxoisindolin-2-yl*

*3-((tert-butoxycarbonyl)amino)-2-methylpropanoate (SI-15)*

Following the **General Procedure A** on 3.00 mmol scale at rt. Purification by column chromatography (silica gel, 20:1 CH<sub>2</sub>Cl<sub>2</sub>:Et<sub>2</sub>O) afforded 1.12 g (77%) of the title compound **SI-15**.

**Physical State:** white solid.

**m.p.:** 135 – 136 °C.

**R<sub>f</sub>** = 0.87 (20:1 CH<sub>2</sub>Cl<sub>2</sub>:Et<sub>2</sub>O).

<sup>1</sup>H NMR (500 MHz, CDCl<sub>3</sub>): δ 5.15 (t, *J* = 6.6 Hz, 1H), 3.51 – 3.46 (m, 1H), 3.35 – 3.29 (m, 1H), 3.14 - 3.07 (m, 1H), 1.41 (s, 9H), 1.32 (d, *J* = 7.1 Hz, 3H) ppm.

<sup>13</sup>C NMR (151 MHz, CDCl<sub>3</sub>): δ 171.3, 157.6, 156.1, 141.1, 130.6, 124.8, 79.8, 43.3, 38.3, 28.4, 14.3 ppm.

HRMS (ESI-TOF): calc'd for C<sub>17</sub>H<sub>17</sub>Cl<sub>4</sub>N<sub>2</sub>O<sub>6</sub> [M+H]<sup>+</sup>: 484.9835, found: 484.9830.

### Compound SI-16

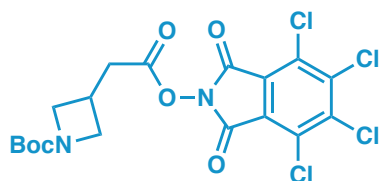

*tert-butyl*

***3-(2-oxo-2-((4,5,6,7-tetrachloro-1,3-dioxoisindolin-2-yl)oxy)ethyl)azetidine-1-carboxylate (SI-16)***

Following **General Procedure A** on 5.00 mmol scale. Purification by column chromatography (silica gel, CH<sub>2</sub>Cl<sub>2</sub>) afforded 2.33 g (93%) of the title compound **SI-16**.

**Physical State:** white solid.

**m.p.:** 165 – 166 °C.

**R<sub>f</sub>** = 0.18 (CH<sub>2</sub>Cl<sub>2</sub>).

**<sup>1</sup>H NMR (400 MHz, CDCl<sub>3</sub>):** δ 4.21 – 4.11 (m, 2H), 3.71 (dd, *J* = 9.2, 4.6 Hz, 2H), 3.06 – 2.92 (m, 3H), 1.44 (s, 9H) ppm.

**<sup>13</sup>C NMR (151 MHz, CDCl<sub>3</sub>):** δ 167.5, 157.5, 156.3, 141.3, 130.7, 124.8, 79.0, 53.8, 35.4, 28.5, 25.2 ppm.

**HRMS (ESI-TOF):** calc'd for C<sub>18</sub>H<sub>17</sub>Cl<sub>4</sub>N<sub>2</sub>O<sub>6</sub> [M+H]<sup>+</sup>: 496.9835, found: 496.9848.

**Compound SI-17**

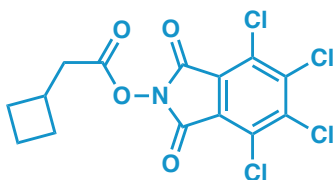

***4,5,6,7-tetrachloro-1,3-dioxoisindolin-2-yl 2-cyclobutylacetate (SI-17)***

Following the **General Procedure A** on 0.20 mmol scale. Purification by column chromatography (silica gel, CH<sub>2</sub>Cl<sub>2</sub>) afforded 62.8 mg (79%) of the title compound **SI-17**.

**Physical State:** white solid.

**m.p.:** 112 – 114 °C.

**R<sub>f</sub>** = 0.92 (CH<sub>2</sub>Cl<sub>2</sub>).

**<sup>1</sup>H NMR (600 MHz, CDCl<sub>3</sub>):** δ 2.86 – 2.72 (m, 3H), 2.29 – 2.18 (m, 2H), 1.99 – 1.80 (m, 4H) ppm.

**<sup>13</sup>C NMR (151 MHz, CDCl<sub>3</sub>):** δ 168.1, 157.7, 141.1, 130.6, 124.9, 37.6, 32.1, 28.2,

18.5 ppm.

**HRMS (ESI-TOF):** calc'd for C<sub>14</sub>H<sub>10</sub>Cl<sub>4</sub>NO<sub>4</sub> [M+H]<sup>+</sup>: 395.9358, found: 395.9636.

### Compound SI-18

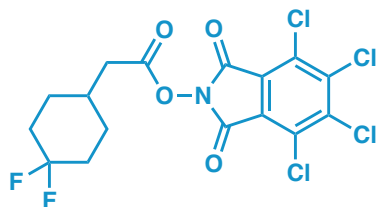

**4,5,6,7-tetrachloro-1,3-dioxoisindolin-2-yl 2-(4,4-difluorocyclohexyl)acetate**  
**(SI-18)**

Following **General Procedure A** on 5.00 mmol scale. Purification by column (silica gel, CH<sub>2</sub>Cl<sub>2</sub>) afforded 1.95 g (85%) of the title compound **SI-18**.

**Physical State:** white solid.

**m.p.:** 170 – 171 °C.

**R<sub>f</sub>** = 0.92 (CH<sub>2</sub>Cl<sub>2</sub>).

**<sup>1</sup>H NMR (600 MHz, CDCl<sub>3</sub>):** δ 2.61 (d, *J* = 7.2 Hz, 2H), 2.20 – 2.07 (m, 2H), 2.05 – 1.89 (m, 3H), 1.85 – 1.66 (m, 2H), 1.53 – 1.36 (m, 2H) ppm.

**<sup>13</sup>C NMR (151 MHz, CDCl<sub>3</sub>):** δ 168.0, 157.6, 141.2, 130.6, 124.8, 123.0 (t, *J* = 241.3 Hz), 37.2, 37.2, 33.3 (t, *J* = 24.4 Hz), 33.2, 28.7, 28.7 ppm.

**<sup>19</sup>F NMR (376 MHz, CDCl<sub>3</sub>):** δ -92.70 (d, *J* = 237.1 Hz), -102.49 (d, *J* = 237.0 Hz) ppm.

The desired mass for HRMS was not observed.

### Compound SI-19

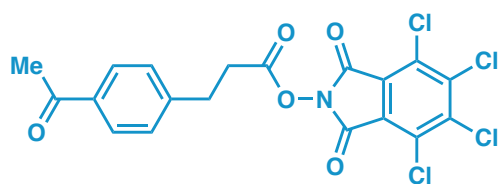

**4,5,6,7-tetrachloro-1,3-dioxoisindolin-2-yl 3-(4-acetylphenyl)propanoate (SI-19)**

Following **General Procedure A** on 2.00 mmol scale. Purification by column (silica

gel, CH<sub>2</sub>Cl<sub>2</sub>) afforded 0.71 g (75%) of the title compound **SI-19**.

**Physical State:** white solid.

**m.p.:** 96 – 97 °C.

**R<sub>f</sub>** = 0.27 (CH<sub>2</sub>Cl<sub>2</sub>).

**<sup>1</sup>H NMR (600 MHz, CDCl<sub>3</sub>):** δ 7.92 (d, *J* = 8.2 Hz, 2H), 7.35 (d, *J* = 8.2 Hz, 2H), 3.15 (t, *J* = 7.7 Hz, 2H), 3.01 (t, *J* = 7.6 Hz, 2H), 2.59 (s, 3H) ppm.

**<sup>13</sup>C NMR (151 MHz, CDCl<sub>3</sub>):** δ 197.8, 168.3, 157.5, 144.5, 141.2, 136.0, 130.6, 129.0, 128.7, 124.8, 32.2, 30.5, 26.7 ppm.

The desired mass for HRMS was not observed.

### Compound SI-20

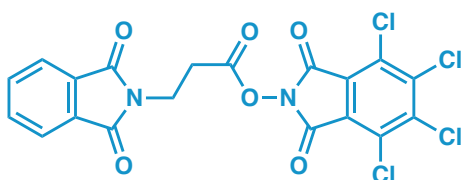

### *4,5,6,7-tetrachloro-1,3-dioxisoindolin-2-yl 3-(1,3-dioxisoindolin-2-yl)propanoate (SI-20)*

Following the **General Procedure A** on 1.48 mmol scale. Purification by column chromatography (silica gel, CH<sub>2</sub>Cl<sub>2</sub>) afforded 142 mg (19%) of the title compound **SI-20**.

**Physical State:** white solid.

**R<sub>f</sub>** = 0.48 (CH<sub>2</sub>Cl<sub>2</sub>).

**<sup>1</sup>H NMR (400 MHz, CDCl<sub>3</sub>):** δ 7.91 – 7.86 (m, 2H), 7.77 – 7.72 (m, 2H), 4.13 (t, *J* = 7.2 Hz, 2H), 3.17 (t, *J* = 7.2 Hz, 2H) ppm.

**<sup>13</sup>C NMR (101 MHz, CDCl<sub>3</sub>):** δ 167.9, 166.7, 157.3, 141.2, 134.4, 132.1, 130.7, 124.8, 123.7, 33.1, 29.8 ppm.

**HRMS (ESI-TOF):** calc'd for C<sub>19</sub>H<sub>9</sub>Cl<sub>4</sub>N<sub>2</sub>O<sub>6</sub> [M+H]<sup>+</sup>: 500.9209, found: 500.9199.

## Compound SI-21

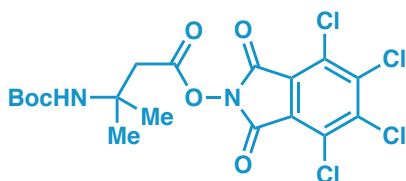

*4,5,6,7-tetrachloro-1,3-dioxoisindolin-2-yl*

*3-((tert-butoxycarbonyl)amino)-3-methylbutanoate (SI-21)*

Following the **General Procedure A** on 3.00 mmol scale. Purification by column chromatography (silica gel, 20:1 CH<sub>2</sub>Cl<sub>2</sub>:Et<sub>2</sub>O) afforded 1.21 g (81%) of the title compound **SI-21**.

**Physical State:** pale yellow solid.

**m.p.:** 162 – 164 °C.

**R<sub>f</sub>** = 0.78 (20:1 CH<sub>2</sub>Cl<sub>2</sub>:Et<sub>2</sub>O).

**<sup>1</sup>H NMR (600 MHz, CDCl<sub>3</sub>):** δ 4.73 (br s, 1H), 3.16 (s, 2H), 1.47 (s, 6H), 1.42 (s, 9H) ppm.

**<sup>13</sup>C NMR (151 MHz, CDCl<sub>3</sub>):** δ 166.7, 157.7, 154.6, 141.2, 130.6, 124.8, 79.6, 51.4, 40.3, 28.5, 27.9 ppm.

The desired mass for HRMS was not observed.

## Compound SI-22

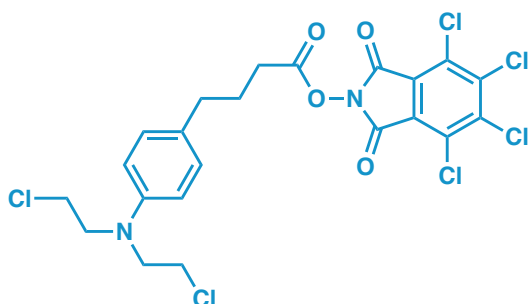

*4,5,6,7-tetrachloro-1,3-dioxoisindolin-2-yl*

*4-(4-(bis(2-chloroethyl)amino)phenyl)butanoate (SI-22)*

Following **General Procedure A** on 5.00 mmol scale. Purification by column chromatography (silica gel, CH<sub>2</sub>Cl<sub>2</sub>) afforded 2.36 g (81%) of the title compound

## SI-22.

**Physical State:** red solid.

**m.p.:** 117 – 118 °C

**R<sub>f</sub>** = 0.99 (CH<sub>2</sub>Cl<sub>2</sub>).

**<sup>1</sup>H NMR (600 MHz, CDCl<sub>3</sub>):** δ 7.10 (d, *J* = 7.7 Hz, 2H), 6.64 (d, *J* = 7.8 Hz, 2H), 3.71 (t, *J* = 7.2 Hz, 4H), 3.63 (t, *J* = 7.2 Hz, 4H), 2.66 (q, *J* = 8.1, 7.6 Hz, 4H), 2.06 (p, *J* = 7.3 Hz, 2H), ppm.

**<sup>13</sup>C NMR (151 MHz, CDCl<sub>3</sub>):** δ 169.2, 157.7, 144.7, 141.1, 130.6, 129.9, 129.7, 124.8, 112.3, 53.7, 40.6, 33.5, 30.1, 26.6 ppm.

The desired mass for HRMS was not observed.

## Compound SI-23

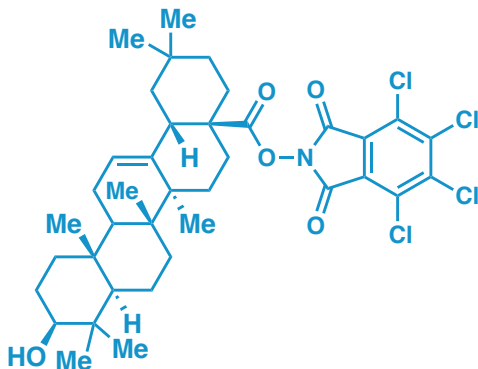

*4,5,6,7-tetrachloro-1,3-dioxoisindolin-2-yl*

*(6a*S*,6b*R*,8a*R*,10*S*,12a*R*,14b*S*)-10-hydroxy-2,2,6a,6b,9,9,12a-heptamethyl-1,3,4,5,6,6a,6b,7,8,8a,9,10,11,12,12a,12b,13,14b-octadecahydronicene-4a(2*H*)-carboxylate*

*(SI-23)*

Following **General Procedure A** on 3.00 mmol scale. Purification by column chromatography (silica gel, CH<sub>2</sub>Cl<sub>2</sub>) afforded 1.9 g (88%) of the title compound

## SI-23.

**Physical State:** white solid.

**m.p.:** >200 °C.

**R<sub>f</sub>** = 0.10 (CH<sub>2</sub>Cl<sub>2</sub>).

**<sup>1</sup>H NMR (600 MHz, CDCl<sub>3</sub>):** δ 5.32 (t, *J* = 3.6 Hz, 1H), 3.21 (dd, *J* = 11.3, 4.5 Hz, 1H), 2.87 (dd, *J* = 13.6, 3.9 Hz, 1H), 2.18 (td, *J* = 13.8, 3.7 Hz, 1H), 2.01 (td, *J* = 13.8, 4.5 Hz, 1H), 1.97 – 1.82 (m, 5H), 1.71 (t, *J* = 13.7 Hz, 1H), 1.64 – 1.58 (m, 2H), 1.58 – 1.52 (m, 3H), 1.51 – 1.43 (m, 3H), 1.42 – 1.39 (m, 2H), 1.34 – 1.29 (m, 1H), 1.26 (dt, *J* = 14.1, 3.3 Hz, 1H), 1.21 (ddd, *J* = 13.7, 4.8, 2.4 Hz, 1H), 1.18 (s, 3H), 1.00 (s, 3H), 0.98 – 0.96 (m, 1H), 0.94 (s, 3H), 0.93 (s, 3H), 0.92 (s, 3H), 0.83 (s, 3H), 0.78 (s, 3H), 0.74 (d, *J* = 11.4 Hz, 1H) ppm.

**<sup>13</sup>C NMR (151 MHz, CDCl<sub>3</sub>):** δ 173.5, 158.0, 142.5, 141.0, 130.5, 125.0, 123.6, 79.2, 55.4, 47.8, 47.5, 45.9, 42.1, 41.7, 39.6, 38.9, 38.7, 37.2, 34.0, 33.1, 32.9, 32.7, 30.7, 28.3, 28.1, 27.4, 25.7, 23.6 (2C), 23.3, 18.5, 17.1, 15.7, 15.6 ppm.

The desired mass for HRMS was not observed.

$[\alpha]_D^{20} = +124.0$  (*c* = 1.0, CH<sub>2</sub>Cl<sub>2</sub>).

#### Compound SI-24

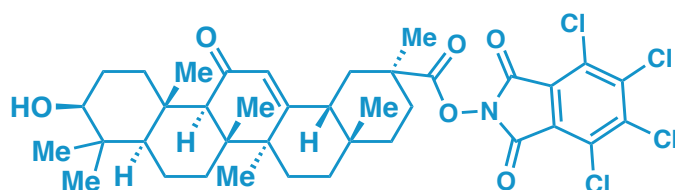

#### *4,5,6,7-tetrachloro-1,3-dioxo-2,3-dihydro-1H-inden-2-yl*

*(2S,4aS,6aS,6bR,8aR,10S,12aS,12bR,14bR)-10-hydroxy-2,4a,6a,6b,9,9,12a-heptamethyl-13-oxo-1,2,3,4,4a,5,6,6a,6b,7,8,8a,9,10,11,12,12a,12b,13,14b-icosahydricene-2-carboxylate (SI-24)*

Following **General Procedure A** on 5.00 mmol scale. Purification by column chromatography (silica gel, CH<sub>2</sub>Cl<sub>2</sub>) afforded 2.89 g (77%) of the title compound **SI-24**.

**Physical State:** white solid.

**m.p.:** >200 °C.

**R<sub>f</sub>** = 0.09 (CH<sub>2</sub>Cl<sub>2</sub>).

**<sup>1</sup>H NMR (400 MHz, CDCl<sub>3</sub>):** δ 5.73 (s, 1H), 3.21 (dd, *J* = 10.8, 5.5 Hz, 1H), 2.78 (dt,

$J = 13.5, 3.6$  Hz, 1H), 2.38 (dd,  $J = 13.6, 4.1$  Hz, 1H), 2.22 – 1.95 (m, 3H), 1.94 – 1.74 (m, 2H), 1.72 – 1.28 (m, 17H), 1.24 – 1.17 (m, 1H), 1.13 (d,  $J = 4.8$  Hz, 6H), 1.10 – 1.03 (m, 1H), 1.00 (s, 3H), 0.98 – 0.92 (m, 1H), 0.90 (s, 3H), 0.80 (s, 3H), 0.69 (d,  $J = 11.7$  Hz, 1H) ppm.

**$^{13}\text{C}$  NMR (151 MHz,  $\text{CDCl}_3$ ):**  $\delta$  200.2, 172.3, 168.3, 157.8, 141.1, 130.6, 129.1, 124.9, 78.9, 62.0, 55.1, 48.0, 45.5, 44.2, 43.2, 41.2, 39.3, 39.3, 37.4, 37.2, 32.9, 32.0, 31.5, 28.5, 28.2, 28.1, 27.4, 26.6, 26.5, 23.5, 18.8, 17.6, 16.5, 15.7 ppm.

**HRMS (ESI-TOF):** calc'd for  $\text{C}_{38}\text{H}_{46}\text{Cl}_4\text{NO}_6$   $[\text{M}+\text{H}]^+$ : 752.2074, found: 752.2075.

$[\alpha]_{\text{D}}^{20} = +166.0$  ( $c = 1.0$ ,  $\text{CH}_2\text{Cl}_2$ ).

### Compound SI-25

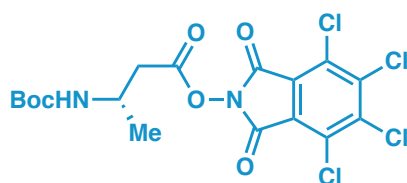

#### *4,5,6,7-tetrachloro-1,3-dioxoisindolin-2-yl*

#### *(S)-3-((tert-butoxycarbonyl)amino)butanoate (SI-25)*

Following the **General Procedure A** on 3.00 mmol scale. Purification by column chromatography (silica gel, 20:1  $\text{CH}_2\text{Cl}_2$ : $\text{Et}_2\text{O}$ ) afforded 1.20 g (82%) of the title compound **SI-25**.

**Physical State:** white solid.

**m.p.:** 133 – 135 °C.

$R_f = 0.87$  (20:1  $\text{CH}_2\text{Cl}_2$ : $\text{Et}_2\text{O}$ ).

**$^1\text{H}$  NMR (500 MHz,  $\text{CDCl}_3$ ):**  $\delta$  4.83 (br s, 1H), 4.18 (br s, 1H), 2.95 – 2.88 (m, 2H), 1.45 (s, 9H), 1.34 (d,  $J = 6.9$  Hz, 3H) ppm.

**$^{13}\text{C}$  NMR (151 MHz,  $\text{CDCl}_3$ ):**  $\delta$  167.1, 157.6, 155.0, 141.2, 130.7, 124.8, 79.9, 43.6, 37.6, 28.5, 19.8 ppm.

**HRMS (ESI-TOF):** calc'd for  $\text{C}_{17}\text{H}_{16}\text{Cl}_4\text{N}_2\text{NaO}_6$   $[\text{M}+\text{Na}]^+$ : 506.9655, found:



506.9658.

$[\alpha]_{\text{D}}^{20} = -61.2$  ( $c = 1.0$ ,  $\text{CH}_2\text{Cl}_2$ ).

### Compound SI-26

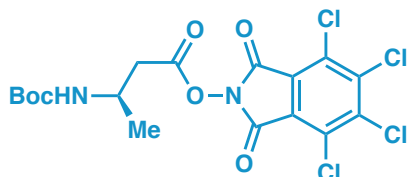

*4,5,6,7-tetrachloro-1,3-dioxoisindolin-2-yl*

*(R)-3-((tert-butoxycarbonyl)amino)butanoate (SI-26)*

Following the **General Procedure A** on 1.85 mmol scale. Purification by column chromatography (silica gel, 20:1  $\text{CH}_2\text{Cl}_2$ : $\text{Et}_2\text{O}$ ) afforded 688.9 mg (77%) of the title compound **SI-26**.

**Physical State:** white solid.

**m.p.:** 136 – 137 °C.

$R_f = 0.87$  (20:1  $\text{CH}_2\text{Cl}_2$ : $\text{Et}_2\text{O}$ ).

$^1\text{H NMR}$  (500 MHz,  $\text{CDCl}_3$ ):  $\delta$  4.88 (br s, 1H), 4.14 (br s, 1H), 2.94 – 2.84 (m, 2H), 1.41 (s, 9H), 1.31 (d,  $J = 6.9$  Hz, 3H) ppm.

$^{13}\text{C NMR}$  (151 MHz,  $\text{CDCl}_3$ ):  $\delta$  167.0, 157.5, 155.0, 141.1, 130.5, 124.7, 79.7, 43.5, 37.5, 28.4, 19.7 ppm.

**HRMS (ESI-TOF):** calc'd for  $\text{C}_{17}\text{H}_{17}\text{Cl}_4\text{N}_2\text{O}_6$   $[\text{M}+\text{H}]^+$ : 484.9835, found: 484.9832.

$[\alpha]_{\text{D}}^{20} = +65.6$  ( $c = 1.0$ ,  $\text{CH}_2\text{Cl}_2$ ).

## Experimental Procedures and Characterization Data for Sulfinimines

### Compound 2

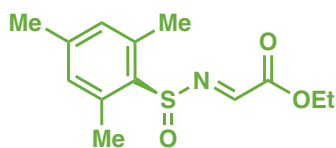

#### *ethyl (S,E)-2-((mesitylsulfinyl)imino)acetate (2)*

Following the **General Procedure B** on 10.00 mmol scale at rt. Purification by column chromatography (silica gel, 4:1 hexanes:EtOAc) afforded 2.02 g (75%) of the title compound **2**.

**Physical State:** white solid.

**m.p.:** 62 – 63 °C.

$R_f$  = 0.53 (4:1 hexanes:EtOAc).

**$^1\text{H NMR}$  (600 MHz,  $\text{CDCl}_3$ ):**  $\delta$  8.24 (s, 1H), 6.86 (s, 2H), 4.40 – 4.35 (m, 2H), 2.45 (s, 6H), 2.28 (s, 3H), 1.37 (t,  $J$  = 7.1 Hz, 3H) ppm.

**$^{13}\text{C NMR}$  (151 MHz,  $\text{CDCl}_3$ ):**  $\delta$  161.5, 154.0, 142.6, 138.9, 133.1, 131.2, 62.8, 21.2, 19.0, 14.2 ppm.

**HRMS (ESI-TOF):** calc'd for  $\text{C}_{13}\text{H}_{18}\text{NO}_3\text{S}$   $[\text{M}+\text{H}]^+$ : 268.1002, found: 268.1010.

$[\alpha]_{\text{D}}^{20}$  = +50.0 ( $c$  = 2.1,  $\text{CH}_2\text{Cl}_2$ ).

For *ent-2*:  $[\alpha]_{\text{D}}^{20}$  = -358.3 ( $c$  = 1.0,  $\text{CHCl}_3$ ).

### Compound 2b

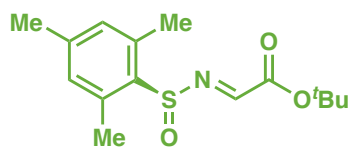

#### *tert-butyl (S,E)-2-((mesitylsulfinyl)imino)acetate (2b)*

Following the **General Procedure B** on 1.00 mmol scale at rt. Purification by column chromatography (silica gel, 4:1 hexanes:EtOAc) afforded 237.8 mg (80%) of the title compound **2b**.

**Physical State:** white solid.

**m.p.:** 67 – 71 °C.

**R<sub>f</sub>** = 0.64 (4:1 hexanes:EtOAc).

**<sup>1</sup>H NMR (500 MHz, CDCl<sub>3</sub>):** δ 8.15 (s, 1H), 6.86 (s, 2H), 2.45 (s, 6H), 2.28 (s, 3H), 1.55 (s, 9H) ppm.

**<sup>13</sup>C NMR (151 MHz, CDCl<sub>3</sub>):** δ 160.6, 155.4, 142.5, 138.9, 133.4, 131.1, 84.2, 28.0, 21.2, 19.0 ppm.

**HRMS (ESI-TOF):** calc'd for C<sub>15</sub>H<sub>22</sub>NO<sub>3</sub>S [M+H]<sup>+</sup>: 296.1315, found: 296.1310.

**[α]<sub>D</sub><sup>20</sup>** = +58.3 (*c* = 1.2, CH<sub>2</sub>Cl<sub>2</sub>).

## Experimental Procedures and Characterization Data for Amino Acids

### Compound 3

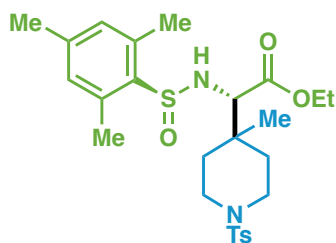

#### *ethyl 2-(((S)-mesitylsulfinyl)amino)-2-(4-methyl-1-tosylpiperidin-4-yl)acetate (3)*

Following **General Procedure C** on 0.10 mmol scale. Purification by pTLC (2:1 hexanes:EtOAc) afforded 42.2 mg (81%) of the title compound **3**.

Following **General Procedure D** on 0.10 mmol scale. Purification by pTLC (2:1 hexanes:EtOAc) afforded 38.0 mg (73%) of the title compound **3**.

**Physical State:** white solid.

**m.p.:** 128 – 130 °C.

$R_f$  = 0.30 (2:1 hexanes:EtOAc).

**<sup>1</sup>H NMR (600 MHz, CDCl<sub>3</sub>):**  $\delta$  7.67 – 7.61 (m, 2H), 7.35 – 7.31 (m, 2H), 6.86 (s, 2H), 5.00 (d,  $J$  = 10.0 Hz, 1H), 4.25 – 4.14 (m, 2H), 3.66 (d,  $J$  = 10.0 Hz, 1H), 3.38 – 3.25 (m, 2H), 2.82 – 2.71 (m, 2H), 2.52 (s, 6H), 2.45 (s, 3H), 2.29 (s, 3H), 1.84 (ddd,  $J$  = 13.8, 9.7, 4.1 Hz, 1H), 1.73 (ddd,  $J$  = 13.6, 9.6, 4.1 Hz, 1H), 1.53 – 1.48 (m, 1H), 1.46 – 1.41 (m, 1H), 1.27 (t,  $J$  = 7.1 Hz, 3H), 0.76 (s, 3H) ppm.

**<sup>13</sup>C NMR (151 MHz, CDCl<sub>3</sub>):**  $\delta$  171.9, 143.8, 141.3, 137.7, 136.9, 133.3, 131.0, 129.9, 127.7, 64.3, 61.8, 41.93, 41.90, 35.8, 33.7, 33.5, 21.7, 21.2, 19.4, 19.2, 14.3 ppm.

**HRMS (ESI-TOF):** calc'd for C<sub>26</sub>H<sub>37</sub>N<sub>2</sub>O<sub>5</sub>S<sub>2</sub> [M+H]<sup>+</sup>: 521.2138, found: 521.2136.

$[\alpha]_D^{20}$  = +76.9 ( $c$  = 1.0, CHCl<sub>3</sub>).

### Compound 8

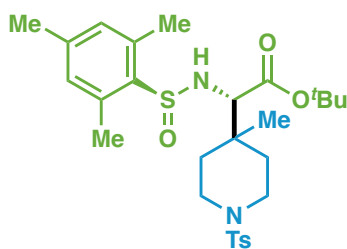

*tert-butyl 2-(((S)-mesitylsulfinyl)amino)-2-(4-methyl-1-tosylpiperidin-4-yl)acetate*  
(8)

Following **General Procedure C** on 0.10 mmol scale. Purification by column chromatography (silica gel, gradient from 4:1 to 1:1 hexanes:EtOAc) afforded 37.3 mg (68%) of the title compound **8**.

**Physical State:** white solid.

**m.p.:** 115 – 116 °C.

**R<sub>f</sub>** = 0.25 (2:1 hexanes:EtOAc).

**<sup>1</sup>H NMR (600 MHz, CDCl<sub>3</sub>):** δ 7.63 (d, *J* = 8.2 Hz, 2H), 7.32 (d, *J* = 8.0 Hz, 2H), 6.86 (s, 2H), 4.97 (d, *J* = 9.9 Hz, 1H), 3.56 (d, *J* = 9.9 Hz, 1H), 3.34 – 3.21 (m, 2H), 2.82 – 2.76 (m, 2H), 2.52 (s, 6H), 2.44 (s, 3H), 2.28 (s, 3H), 1.85 (ddd, *J* = 13.4, 9.5, 3.8 Hz, 1H), 1.72 (ddd, *J* = 13.3, 9.4, 3.9 Hz, 1H), 1.52 – 1.43 (m, 11H), 0.76 (s, 3H) ppm.

**<sup>13</sup>C NMR (151 MHz, CDCl<sub>3</sub>):** δ 170.8, 143.8, 141.2, 137.8, 136.8, 133.3, 131.0, 130.0, 127.7, 82.9, 64.6, 41.9, 35.6, 33.9, 33.5, 28.1, 21.7, 21.2, 19.3 ppm.

**HRMS (ESI-TOF):** calc'd for C<sub>28</sub>H<sub>41</sub>N<sub>2</sub>O<sub>5</sub>S<sub>2</sub> [M+H]<sup>+</sup>: 549.2451, found: 549.2470.

[α]<sub>D</sub><sup>20</sup> = +69.5 (*c* = 1.0, CH<sub>2</sub>Cl<sub>2</sub>).

### Compound 9

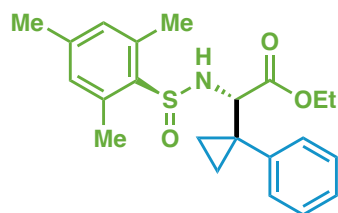

*ethyl 2-(((S)-mesitylsulfinyl)amino)-2-(1-phenylcyclopropyl)acetate* (9)

Following **General Procedure C** on 0.10 mmol scale. Purification by pTLC (3:1 hexanes:EtOAc) afforded 36.3 mg (94%) of the title compound **9**.

**Physical State:** colorless oil.

$R_f = 0.57$  (2:1 hexanes:EtOAc).

**$^1\text{H}$  NMR (400 MHz,  $\text{CDCl}_3$ ):**  $\delta$  7.25 – 7.16 (m, 5H), 6.86 (s, 2H), 5.09 (d,  $J = 7.8$  Hz, 1H), 4.20 – 4.09 (m, 2H), 3.77 (d,  $J = 7.8$  Hz, 1H), 2.55 (s, 6H), 2.29 (s, 3H), 1.26 – 1.17 (m, 4H), 1.06 – 0.94 (m, 2H), 0.92 – 0.86 (m, 1H) ppm.

**$^{13}\text{C}$  NMR (151 MHz,  $\text{CDCl}_3$ ):**  $\delta$  171.7, 141.0, 140.8, 137.9, 136.9, 131.0, 130.6, 128.2, 127.4, 64.3, 61.8, 29.6, 21.2, 19.4, 14.2, 11.7, 11.5 ppm.

**HRMS (ESI-TOF):** calc'd for  $\text{C}_{22}\text{H}_{28}\text{NO}_3\text{S}$   $[\text{M}+\text{H}]^+$ : 386.1784, found: 386.1790.

$[\alpha]_D^{20} = +178.8$  ( $c = 1.0$ ,  $\text{CHCl}_3$ ).

### Compound 10

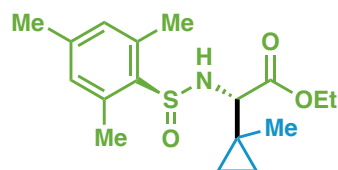

### *tert-butyl 2-(((S)-mesitylsulfinyl)amino)-2-(1-methylcyclopropyl)acetate (10)*

Following **General Procedure C** on 0.10 mmol scale. Purification by column chromatography (silica gel, gradient from 9:1 to 4:1 hexanes:EtOAc) afforded 28.4 mg (88%) of the title compound **10**.

**Physical State:** pale yellow solid.

**m.p.:**  $>200$  °C.

$R_f = 0.45$  (2:1 hexanes:EtOAc).

**$^1\text{H}$  NMR (600 MHz,  $\text{CDCl}_3$ ):**  $\delta$  6.87 (s, 2H), 5.19 (d,  $J = 6.7$  Hz, 1H), 4.28 – 4.16 (m, 2H), 3.47 (d,  $J = 6.6$  Hz, 1H), 2.59 (s, 6H), 2.29 (s, 3H), 1.29 (t,  $J = 7.1$  Hz, 3H), 0.99 (s, 3H), 0.80 – 0.76 (m, 1H), 0.70 – 0.66 (m, 1H), 0.46 – 0.39 (m, 2H) ppm.

**$^{13}\text{C}$  NMR (151 MHz,  $\text{CDCl}_3$ ):**  $\delta$  172.2, 140.9, 137.9, 136.9, 130.9, 63.5, 61.7, 21.1, 19.4, 19.21, 19.18, 14.3, 12.3, 11.9 ppm.

**HRMS (ESI-TOF):** calc'd for  $\text{C}_{17}\text{H}_{26}\text{NO}_3\text{S}$   $[\text{M}+\text{H}]^+$ : 324.1628, found: 324.1630.

$[\alpha]_{\text{D}}^{20} = +164.0$  ( $c = 0.1$ ,  $\text{CH}_2\text{Cl}_2$ ).

For previous  $\alpha$ -amino acid (AA) synthesis, see ref 8.

### Compound 11

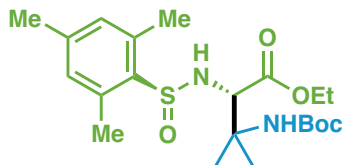

*ethyl*

*2-(1-((tert-butoxycarbonyl)amino)cyclopropyl)-2-(((S)-mesitylsulfinyl)amino)acetate (11)*

Following **General Procedure C** on 0.10 mmol scale. Purification by column chromatography (silica gel, gradient from 9:1 to 4:1 hexanes:EtOAc) afforded 17.6 mg (41%) of the title compound **11**.

**Physical State:** colorless oil.

$R_f = 0.25$  (2:1 hexanes:EtOAc).

$^1\text{H NMR}$  (600 MHz,  $\text{CDCl}_3$ ):  $\delta$  6.86 (s, 2H), 5.53 (br s, 1H), 4.98 (br s, 1H), 4.23 – 4.10 (m, 2H), 3.80 (d,  $J = 6.2$  Hz, 1H), 2.58 (s, 6H), 2.28 (s, 3H), 1.39 (s, 9H), 1.28 (t,  $J = 7.2$  Hz, 3H), 1.11 (br s, 1H), 0.99 (br s, 1H), 0.89 (br s, 1H), 0.83 (br s, 1H) ppm.

$^{13}\text{C NMR}$  (151 MHz,  $\text{CDCl}_3$ ):  $\delta$  171.3, 155.6, 141.1, 137.6, 137.0, 131.0, 80.0, 62.0, 61.4, 36.0, 28.4, 21.2, 19.5, 14.2, 13.2, 13.0 ppm.

**HRMS (ESI-TOF):** calc'd for  $\text{C}_{21}\text{H}_{33}\text{N}_2\text{O}_5\text{S}$   $[\text{M}+\text{H}]^+$ : 425.2105, found: 425.2133.

$[\alpha]_{\text{D}}^{20} = +97.2$  ( $c = 1.1$ ,  $\text{CH}_2\text{Cl}_2$ ).

### Compound 12

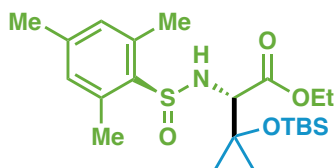

*ethyl*

*2-(1-((tert-butyl dimethylsilyl)oxy)cyclopropyl)-2-(((S)-mesitylsulfinyl)amino)acetate*

(12)

Following **General Procedure C** on 0.10 mmol scale. Purification by column chromatography (silica gel, 9:1 hexanes:EtOAc) afforded 30.4 mg (69%) of the title compound **12**.

**Physical State:** yellow solid.

**m.p.:** >200 °C.

**R<sub>f</sub>** = 0.56 (2:1 hexanes:EtOAc).

**<sup>1</sup>H NMR (600 MHz, CDCl<sub>3</sub>):** δ 6.86 (s, 2H), 5.36 (d, *J* = 8.2 Hz, 1H), 4.22 (qq, *J* = 11.0, 7.1 Hz, 2H), 3.54 (d, *J* = 8.2 Hz, 1H), 2.60 (s, 6H), 2.28 (s, 3H), 1.29 (t, *J* = 7.2 Hz, 3H), 0.96 – 0.93 (m, 1H), 0.88 – 0.80 (m, 3H), 0.76 (s, 9H), -0.04 (s, 3H), -0.10 (s, 3H) ppm.

**<sup>13</sup>C NMR (151 MHz, CDCl<sub>3</sub>):** δ 171.3, 140.9, 138.1, 136.6, 130.9, 64.0, 61.8, 60.0, 25.6, 21.2, 19.4, 18.0, 14.3, 12.5, 12.3, -3.5 ppm.

**HRMS (ESI-TOF):** calc'd for C<sub>22</sub>H<sub>38</sub>NO<sub>4</sub>SSi [M+H]<sup>+</sup>: 440.2285, found: 440.2284.

**[α]<sub>D</sub><sup>20</sup>** = +231.5 (*c* = 0.1, CH<sub>2</sub>Cl<sub>2</sub>).

For previous AA synthesis, see ref 9.

### Compound 13

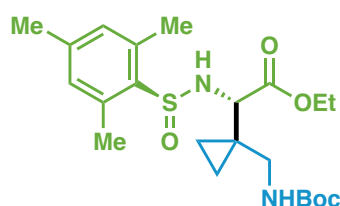

*ethyl*

**(S)-2-(1-(((tert-butoxycarbonyl)amino)methyl)cyclopropyl)-2-(((S)-mesitylsulfinyl)amino)acetate (13)**

Following **General Procedure C** on 0.10 mmol scale. Purification by pTLC (2:1 hexanes:EtOAc) afforded 37.3 mg (85%) of the title compound **13**.

**Physical State:** colorless oil.

**R<sub>f</sub>** = 0.42 (2:1 hexanes:EtOAc).



**<sup>1</sup>H NMR (400 MHz, CDCl<sub>3</sub>):** δ 6.86 (s, 2H), 5.31 (d, *J* = 6.6 Hz, 1H), 4.81 (br s, 1H), 4.29 – 4.13 (m, 2H), 3.64 (d, *J* = 6.5 Hz, 1H), 3.23 (dd, *J* = 14.4, 6.5 Hz, 1H), 2.97 (dd, *J* = 14.3, 5.5 Hz, 1H), 2.58 (s, 6H), 2.28 (s, 3H), 1.38 (s, 9H), 1.29 (t, *J* = 7.1 Hz, 3H), 0.85 – 0.78 (m, 1H), 0.71 – 0.63 (m, 2H), 0.62 – 0.56 (m, 1H) ppm.

**<sup>13</sup>C NMR (151 MHz, CDCl<sub>3</sub>):** δ 172.2, 155.9, 141.2, 137.6, 136.9, 131.0, 79.3, 62.1, 61.0, 45.1, 28.5, 24.0, 21.1, 19.4, 14.2, 10.3, 9.7 ppm.

**HRMS (ESI-TOF):** calc'd for C<sub>22</sub>H<sub>35</sub>N<sub>2</sub>O<sub>5</sub>S [M+H]<sup>+</sup>: 439.2261, found: 439.2260.

**[α]<sub>D</sub><sup>20</sup>** = +135.4 (*c* = 1.0, CHCl<sub>3</sub>).

### Compound 14

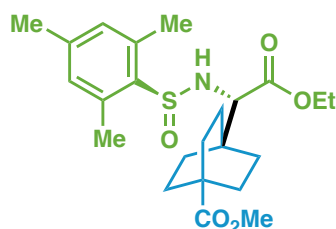

#### *methyl*

#### *4-(2-ethoxy-1-(((S)-mesitylsulfinyl)amino)-2-oxoethyl)bicyclo[2.2.2]octane-1-carboxylate (14)*

Following **General Procedure C** on 0.10 mmol scale. Purification by pTLC (3: 1 hexanes:EtOAc) afforded 38.4 mg (88%) of the title compound **14**.

**Physical State:** colorless oil.

**R<sub>f</sub>** = 0.48 (2:1 hexanes:EtOAc).

**<sup>1</sup>H NMR (400 MHz, CDCl<sub>3</sub>):** δ 6.87 (s, 2H), 4.92 (d, *J* = 10.3 Hz, 1H), 4.28 – 4.15 (m, 2H), 3.62 (s, 3H), 3.54 (d, *J* = 10.3 Hz, 1H), 2.56 (s, 6H), 2.29 (s, 3H), 1.84 – 1.68 (m, 6H), 1.67 – 1.58 (m, 3H), 1.47 – 1.37 (m, 3H), 1.30 (t, *J* = 7.1 Hz, 3H) ppm.

**<sup>13</sup>C NMR (151 MHz, CDCl<sub>3</sub>):** δ 178.1, 172.3, 141.1, 138.0, 136.9, 131.0, 65.2, 61.6, 51.9, 38.9, 35.6, 28.1, 27.2, 21.2, 19.5, 14.3 ppm.

**HRMS (ESI-TOF):** calc'd for C<sub>23</sub>H<sub>34</sub>NO<sub>5</sub>S [M+H]<sup>+</sup>: 436.2152, found: 436.2147.

**[α]<sub>D</sub><sup>20</sup>** = +71.4 (*c* = 0.5, CHCl<sub>3</sub>).

### Compound 15

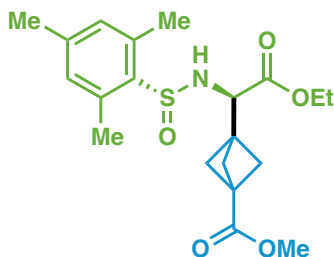

*methyl*

*3-((R)-2-ethoxy-1-(((R)-mesitylsulfinyl)amino)-2-oxoethyl)bicyclo[1.1.1]pentane-1-carboxylate (15)*

Following **General Procedure D** on 0.20 mmol scale. Purification by column chromatography (silica gel, gradient from 1:0 to 0:1 heptanes:EtOAc) afforded 43 mg (54%) of the title compound **15**.

**Physical State:** amorphous material.

$R_f = 0.60$  (1:1 heptanes:EtOAc).

$^1\text{H NMR}$  (400 MHz,  $\text{CDCl}_3$ ):  $\delta$  6.86 (s, 2H), 5.05 (d,  $J = 8.1$  Hz, 1H), 4.32 – 4.13 (m, 2H), 4.06 (d,  $J = 8.2$  Hz, 1H), 3.65 (s, 3H), 2.56 (s, 6H), 2.28 (s, 3H), 1.99 (s, 6H), 1.28 (t,  $J = 7.1$  Hz, 3H) ppm.

$^{13}\text{C NMR}$  (101 MHz,  $\text{CDCl}_3$ ):  $\delta$  170.9, 167.0, 141.2, 137.7, 136.9, 131.0, 62.0, 57.2, 51.8, 50.7, 40.1, 37.7, 21.1, 19.4, 14.4 ppm.

**HRMS (ESI-TOF):** calc'd for  $\text{C}_{20}\text{H}_{28}\text{NO}_5\text{S}$   $[\text{M}+\text{H}]^+$ : 394.1683, found: 394.1677.

$[\alpha]_D^{20} = -77.8$  ( $c = 0.2$ , MeOH).

### Compound 16

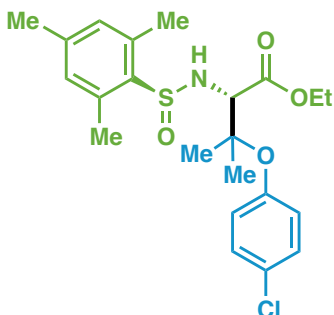

***ethyl 3-(4-chlorophenoxy)-2-(((S)-mesitylsulfinyl)amino)-3-methylbutanoate (16)***

Following **General Procedure C** on 0.10 mmol scale. Purification by pTLC (3: 1 hexanes:EtOAc) afforded 40.3 mg (92%) of the title compound **16**.

**Physical State:** colorless oil.

$R_f = 0.52$  (2:1 hexanes:EtOAc).

$^1\text{H NMR}$  (600 MHz,  $\text{CDCl}_3$ ):  $\delta$  7.20 – 7.18 (m, 2H), 6.89 – 6.85 (m, 4H), 5.33 (d,  $J = 9.9$  Hz, 1H), 4.34 – 4.21 (m, 2H), 4.01 (d,  $J = 9.9$  Hz, 1H), 2.58 (s, 6H), 2.29 (s, 3H), 1.33 – 1.29 (m, 9H) ppm.

$^{13}\text{C NMR}$  (151 MHz,  $\text{CDCl}_3$ ):  $\delta$  171.4, 153.0, 141.2, 137.9, 137.0, 131.0, 129.4, 129.2, 125.5, 81.9, 65.6, 61.9, 24.3, 23.8, 21.2, 19.5, 14.3 ppm.

**HRMS (ESI-TOF):** calc'd for  $\text{C}_{22}\text{H}_{29}\text{ClNO}_4\text{S}$   $[\text{M}+\text{H}]^+$ : 438.1500, found: 438.1500.

$[\alpha]_D^{20} = +31.4$  ( $c = 1.0$ ,  $\text{CHCl}_3$ ).

**Compound 17**

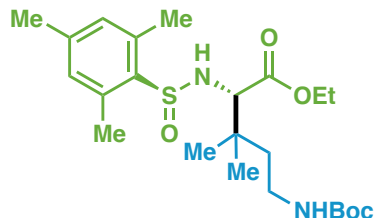

*ethyl*

***(S)-5-((tert-butoxycarbonyl)amino)-2-(((S)-mesitylsulfinyl)amino)-3,3-dimethylpentanoate (17)***

Following **General Procedure C** on 0.10 mmol scale. Purification by pTLC (2: 1 hexanes:EtOAc) afforded 34.6 mg (76%) of the title compound **17**.

Following **General Procedure C** on 1.0 mmol scale. Purification by column (2:1 hexanes:EtOAc) afforded 327.6 mg (72%) of the title compound **17**.

**Physical State:** colorless oil.

$R_f = 0.40$  (2:1 hexanes:EtOAc).

$^1\text{H NMR}$  (600 MHz,  $\text{CDCl}_3$ ):  $\delta$  6.86 (s, 2H), 5.04 (d,  $J = 10.1$  Hz, 1H), 4.47 (s, 1H),

4.28 – 4.16 (m, 2H), 3.66 (d,  $J = 10.1$  Hz, 1H), 3.27 – 3.05 (m, 2H), 2.56 (s, 6H), 2.28 (s, 3H), 1.54 – 1.46 (m, 2H), 1.43 (s, 9H), 1.30 (t,  $J = 7.2$  Hz, 3H), 0.96 (s, 6H) ppm.

$^{13}\text{C}$  NMR (151 MHz,  $\text{CDCl}_3$ ):  $\delta$  172.5, 155.9, 141.1, 137.9, 136.9, 131.0, 79.4, 65.5, 61.7, 38.8, 37.1, 36.5, 28.5, 23.9, 23.6, 21.2, 19.4, 14.3 ppm.

HRMS (ESI-TOF): calc'd for  $\text{C}_{23}\text{H}_{39}\text{N}_2\text{O}_5\text{S}$   $[\text{M}+\text{H}]^+$ : 455.2574, found: 455.2569.

$[\alpha]_{\text{D}}^{20} = +57.2$  ( $c = 1.0$ ,  $\text{CHCl}_3$ ).

### Compound 18

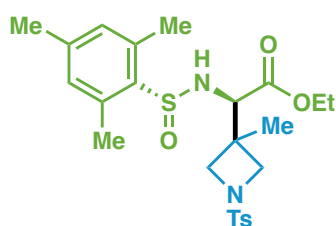

*ethyl (R)-2-(((R)-mesitylsulfinyl)amino)-2-(3-methyl-1-tosylazetidin-3-yl)acetate (18)*

Following **General Procedure D** on 0.20 mmol scale. Purification by column chromatography (silica gel, gradient from 1:0 to 0:1 heptanes:EtOAc) afforded 58 mg (59%) of the title compound **18**.

**Physical State:** amorphous material.

$R_f = 0.45$  (1:1 heptanes:EtOAc).

$^1\text{H}$  NMR (400 MHz,  $\text{CDCl}_3$ ):  $\delta$  7.74 (d,  $J = 8.2$  Hz, 2H), 7.40 (d,  $J = 8.0$  Hz, 2H), 6.86 (s, 2H), 5.06 (d,  $J = 8.4$  Hz, 1H), 4.24 – 4.07 (m, 2H), 3.92 (d,  $J = 8.5$  Hz, 1H), 3.73 (dd,  $J = 8.3, 4.5$  Hz, 2H), 3.49 (d,  $J = 8.5$  Hz, 1H), 3.42 (d,  $J = 8.3$  Hz, 1H), 2.52 (s, 6H), 2.48 (s, 3H), 2.28 (s, 3H), 1.24 (t,  $J = 7.1$  Hz, 3H), 1.00 (s, 3H) ppm.

$^{13}\text{C}$  NMR (101 MHz,  $\text{CDCl}_3$ ):  $\delta$  170.8, 144.6, 141.5, 137.4, 136.8, 131.4, 131.1, 130.0, 128.4, 62.4, 62.3, 59.7, 59.6, 37.0, 21.8, 21.2, 19.8, 19.4, 14.2 ppm.

HRMS (ESI-TOF): calc'd for  $\text{C}_{24}\text{H}_{33}\text{N}_2\text{O}_5\text{S}_2$   $[\text{M}+\text{H}]^+$ : 493.1825, found: 493.1825.

$[\alpha]_{\text{D}}^{20} = -71.7$  ( $c = 0.3$ , MeOH).

### Compound 19

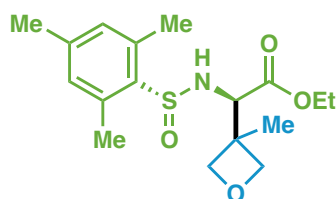

#### *ethyl (R)-2-(((R)-mesitylsulfinyl)amino)-2-(3-methyloxetan-3-yl)acetate (19)*

Following **General Procedure D** on 0.10 mmol scale. Purification by column chromatography (silica gel, gradient from 19:1 to 2:3 heptanes:EtOAc) afforded 20.2 mg (60%) of the title compound **19**.

**Physical State:** white solid.

$R_f$  = 0.3 (7:3 heptanes:EtOAc).

$^1\text{H NMR}$  (400 MHz,  $\text{DMSO-}d_6$ ):  $\delta$  6.89 (s, 2H), 6.34 (d,  $J$  = 8.9 Hz, 1H), 4.62 (dd,  $J$  = 12.9, 6.0 Hz, 2H), 4.23 – 4.13 (m, 3H), 4.02 – 3.89 (m, 2H), 2.52 (s, 6H), 2.25 (s, 3H), 1.24 (s, 3H), 1.10 (t,  $J$  = 7.1 Hz, 3H) ppm.

$^{13}\text{C NMR}$  (101 MHz,  $\text{DMSO-}d_6$ ):  $\delta$  170.4, 139.9, 136.8, 136.3, 130.5, 78.9, 78.8, 70.0, 60.6, 41.6, 20.4, 19.6, 19.0, 13.8 ppm.

**HRMS (ESI-TOF):** calc'd for  $\text{C}_{17}\text{H}_{26}\text{NO}_4\text{S}$   $[\text{M}+\text{H}]^+$ : 340.1577, found: 340.1579.

$[\alpha]_D^{22}$  = -88.8 ( $c$  = 0.1, MeOH).

### Compound 20

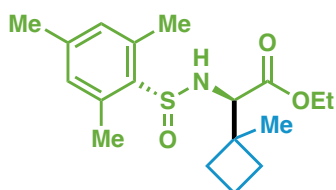

#### *ethyl (R)-2-(((R)-mesitylsulfinyl)amino)-2-(1-methylcyclobutyl)acetate (20)*

Following **General Procedure D** on 0.10 mmol scale. Purification by column chromatography (silica gel, gradient from 99:1 to 4:1 heptanes:EtOAc) afforded 19 mg (56%) of the title compound **20**.

**Physical State:** white solid.

$R_f$  = 0.27 (4:1 heptanes:EtOAc).

**<sup>1</sup>H NMR (400 MHz, CDCl<sub>3</sub>):** δ 6.87 (s, 2H), 5.13 (d, *J* = 8.6 Hz, 1H), 4.31 – 4.11 (m, 2H), 3.95 (d, *J* = 8.7 Hz, 1H), 2.58 (s, 6H), 2.31 – 2.26 (m, 4H), 2.18 – 2.08 (m, 1H), 2.02 – 1.88 (m, 1H), 1.87 – 1.75 (m, 1H), 1.70 – 1.63 (m, 2H), 1.27 (t, *J* = 7.1 Hz, 3H), 1.03 (s, 3H) ppm.

**<sup>13</sup>C NMR (101 MHz, CDCl<sub>3</sub>):** δ 172.4, 141.0, 138.2, 136.9, 130.9, 65.1, 61.6, 41.9, 31.73, 31.65, 21.6, 21.2, 19.5, 14.9, 14.4 ppm.

**HRMS (ESI-TOF):** calc'd for C<sub>17</sub>H<sub>26</sub>NO<sub>3</sub>S [M+H]<sup>+</sup>: 338.1784, found: 338.1776.

[α]<sub>D</sub><sup>20</sup> = -50.2 (*c* = 0.6, CHCl<sub>3</sub>).

### Compound 21

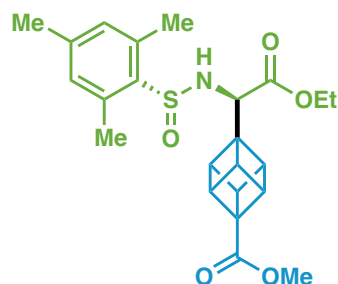

*methyl*

*4-((R)-2-ethoxy-1-(((R)-mesitylsulfinyl)amino)-2-oxoethyl)cubane-1-carboxylate*

(21)

Following **General Procedure D** on 0.20 mmol scale. Purification by column chromatography (silica gel, gradient from 1:0 to 0:1 heptanes:EtOAc) afforded 69 mg (80%) of the title compound **21**.

**Physical State:** amorphous material.

**R<sub>f</sub>** = 0.62 (1:1 heptanes:EtOAc).

**<sup>1</sup>H NMR (400 MHz, CDCl<sub>3</sub>):** δ 6.87 (s, 2H), 5.10 (d, *J* = 7.1 Hz, 1H), 4.30 (dq, *J* = 10.7, 7.1 Hz, 1H), 4.22 (d, *J* = 7.1 Hz, 1H), 4.19 – 4.07 (m, 4H), 3.97 – 3.91 (m, 3H), 3.68 (s, 3H), 2.57 (s, 6H), 2.28 (s, 3H), 1.25 (t, *J* = 7.1 Hz, 3H) ppm.

**<sup>13</sup>C NMR (101 MHz, CDCl<sub>3</sub>):** δ 172.4, 170.9, 141.2, 137.8, 137.0, 131.0, 61.9, 58.5, 57.4, 56.4, 51.6, 46.2, 45.2, 21.1, 19.4, 14.4 ppm.

**HRMS (ESI-TOF):** calc'd for C<sub>23</sub>H<sub>28</sub>NO<sub>5</sub>S [M+H]<sup>+</sup>: 430.1683, found: 430.1672.

$[\alpha]_D^{20} = -56.5$  ( $c = 0.2$ , MeOH).

For previous AA synthesis, see ref 10.

### Compound 22

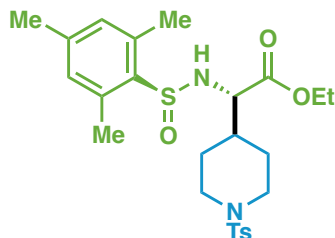

#### *ethyl 2-(((S)-mesitylsulfinyl)amino)-2-(1-tosylpiperidin-4-yl)acetate (22)*

Following **General Procedure C** on 0.10 mmol scale. Purification by pTLC (2:1 hexanes:EtOAc) afforded 38.5 mg (76%) of the title compound **22**.

**Physical State:** colorless oil.

$R_f = 0.18$  (2:1 hexanes:EtOAc).

**$^1\text{H}$  NMR (400 MHz,  $\text{CDCl}_3$ ):**  $\delta$  7.66 – 7.55 (m, 2H), 7.34 – 7.27 (m, 2H), 6.87 (s, 2H), 4.99 (d,  $J = 9.1$  Hz, 1H), 4.20 (q,  $J = 7.1$  Hz, 2H), 3.87 – 3.72 (m, 3H), 2.56 (s, 6H), 2.42 (s, 3H), 2.29 (s, 3H), 2.26 – 2.10 (m, 2H), 1.72 – 1.53 (m, 4H), 1.49 – 1.37 (m, 1H), 1.27 (t,  $J = 7.1$  Hz, 3H) ppm.

**$^{13}\text{C}$  NMR (151 MHz,  $\text{CDCl}_3$ ):**  $\delta$  172.4, 143.7, 141.3, 137.8, 136.8, 133.2, 131.1, 129.8, 127.8, 62.1, 61.3, 46.11, 46.09, 39.4, 28.2, 26.6, 21.7, 21.2, 19.5, 14.3 ppm.

**HRMS (ESI-TOF):** calc'd for  $\text{C}_{25}\text{H}_{35}\text{N}_2\text{O}_5\text{S}_2$   $[\text{M}+\text{H}]^+$ : 507.1982, found: 507.1988.

$[\alpha]_D^{20} = +162.0$  ( $c = 1.0$ ,  $\text{CHCl}_3$ ).

### Compound 23

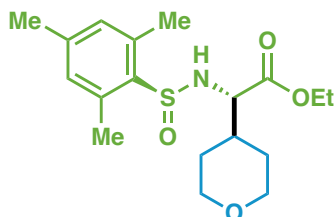

#### *ethyl 2-(((S)-mesitylsulfinyl)amino)-2-(tetrahydro-2H-pyran-4-yl)acetate (23)*

Following **General Procedure C** on 0.10 mmol scale. Purification by column chromatography (silica gel, gradient from 4:1 to 2:1 hexanes:EtOAc) afforded 23.0 mg (65%) of the title compound **23**.

**Physical State:** pale yellow oil.

$R_f$  = 0.11 (2:1 hexanes:EtOAc).

$^1\text{H NMR}$  (600 MHz,  $\text{CDCl}_3$ ):  $\delta$  6.87 (s, 2H), 5.04 (d,  $J$  = 9.2 Hz, 1H), 4.29 – 4.19 (m, 2H), 3.96 (ddd,  $J$  = 16.7, 11.4, 3.4 Hz, 2H), 3.80 (dd,  $J$  = 9.2, 5.8 Hz, 1H), 3.39 – 3.27 (m, 2H), 2.58 (s, 6H), 2.29 (s, 3H), 1.97 – 1.91 (m, 1H), 1.60 (qd,  $J$  = 12.4, 4.6 Hz, 1H), 1.54 – 1.46 (m, 2H), 1.41 (qd,  $J$  = 13.0, 12.5, 5.6 Hz, 1H), 1.30 (t,  $J$  = 7.1 Hz, 3H) ppm.

$^{13}\text{C NMR}$  (151 MHz,  $\text{CDCl}_3$ ):  $\delta$  172.7, 141.2, 137.9, 136.8, 131.0, 67.7, 67.6, 62.0, 61.9, 39.2, 29.4, 28.1, 21.2, 19.5, 14.3 ppm.

**HRMS (ESI-TOF):** calc'd for  $\text{C}_{18}\text{H}_{28}\text{NO}_4\text{S}$   $[\text{M}+\text{H}]^+$ : 354.1734, found: 354.1733.

$[\alpha]_D^{20}$  = +106.0 ( $c$  = 1.0,  $\text{CH}_2\text{Cl}_2$ ).

For previous AA syntheses, see ref 11.

### Compound 24

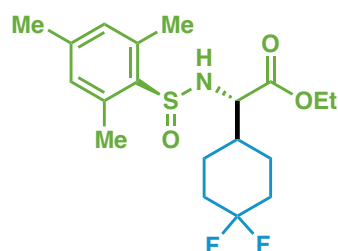

*ethyl (S)-2-(4,4-difluorocyclohexyl)-2-(((S)-mesitylsulfinyl)amino)acetate (24)*

Following **General Procedure C** on 0.10 mmol scale. Purification by pTLC (3:1 hexanes:EtOAc) afforded 27.2 mg (70%) of the title compound **24**.

**Physical State:** colorless oil.

$R_f$  = 0.48 (2:1 hexanes:EtOAc).

$^1\text{H NMR}$  (400 MHz,  $\text{CDCl}_3$ ):  $\delta$  6.88 (s, 2H), 5.06 (d,  $J$  = 8.9 Hz, 1H), 4.31 – 4.19 (m, 2H), 3.85 (dd,  $J$  = 8.9, 5.4 Hz, 1H), 2.58 (s, 6H), 2.29 (s, 3H), 2.20 – 2.01 (m, 2H),



1.83 – 1.56 (m, 6H), 1.49 – 1.36 (m, 1H), 1.31 (t,  $J = 7.1$  Hz, 3H) ppm.

$^{13}\text{C}$  NMR (151 MHz,  $\text{CDCl}_3$ ):  $\delta$  172.7, 141.3, 137.9, 136.9, 131.0, 123.0 (t,  $J = 240.9$  Hz), 62.0, 61.10, 61.09, 39.9, 33.3 (q,  $J = 22.7$  Hz), 25.8 (d,  $J = 9.9$  Hz), 24.1 (d,  $J = 9.9$  Hz), 21.2, 19.5, 14.3 ppm.

$^{19}\text{F}$  NMR (376 MHz,  $\text{CDCl}_3$ ):  $\delta$  -92.32 (d,  $J = 236.5$  Hz), -102.67 (d,  $J = 236.4$  Hz) ppm.

HRMS (ESI-TOF): calc'd for  $\text{C}_{19}\text{H}_{27}\text{F}_2\text{NNaO}_3\text{S}$   $[\text{M}+\text{Na}]^+$ : 410.1572, found: 410.1578.

$[\alpha]_{\text{D}}^{20} = +28.0$  ( $c = 1.0$ ,  $\text{CHCl}_3$ ).

For previous AA synthesis, see ref 12.

### Compound 25

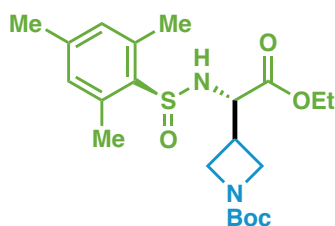

*tert-butyl*

*3-((S)-2-ethoxy-1-(((S)-mesitylsulfinyl)amino)-2-oxoethyl)azetidine-1-carboxylate*  
(25)

Following **General Procedure C** on 0.10 mmol scale. Purification by pTLC (2:1 hexanes:EtOAc) afforded 27.6 mg (65%) of the title compound **25**.

**Physical State:** colorless oil.

$R_f = 0.48$  (2:1 hexanes:EtOAc).

$^1\text{H}$  NMR (600 MHz,  $\text{CDCl}_3$ ):  $\delta$  6.88 (s, 2H), 5.15 (d,  $J = 8.6$  Hz, 1H), 4.28 – 4.17 (m, 2H), 4.09 (t,  $J = 8.3$  Hz, 1H), 3.98 (t,  $J = 8.6$  Hz, 1H), 3.94 – 3.89 (m, 2H), 3.78 (dd,  $J = 9.0, 5.6$  Hz, 1H), 2.85 – 2.77 (m, 1H), 2.59 (s, 6H), 2.29 (s, 3H), 1.41 (s, 9H), 1.28 (t,  $J = 7.2$  Hz, 3H) ppm.

$^{13}\text{C}$  NMR (151 MHz,  $\text{CDCl}_3$ ):  $\delta$  171.9, 156.2, 141.4, 137.6, 136.9, 131.0, 79.8, 62.3, 58.9, 51.7, 50.9, 32.3, 28.4, 21.1, 19.4, 14.2 ppm.

HRMS (ESI-TOF): calc'd for  $\text{C}_{21}\text{H}_{33}\text{N}_2\text{O}_5\text{S}$   $[\text{M}+\text{H}]^+$ : 425.2105, found: 425.2093.

$[\alpha]_{\text{D}}^{20} = +23.1$  ( $c = 1.0$ ,  $\text{CHCl}_3$ ).

For previous AA synthesis, see ref 13.

### Compound 26

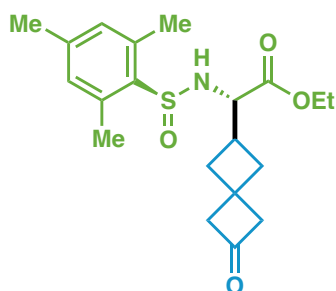

#### *ethyl (S)-2-(((S)-mesitylsulfinyl)amino)-2-(6-oxospiro[3.3]heptan-2-yl)acetate (26)*

Following **General Procedure C** on 0.10 mmol scale. Purification by pTLC (3:1 hexanes:EtOAc) afforded 28.4 mg (75%) of the title compound **26**.

**Physical State:** colorless oil.

$R_f = 0.20$  (2:1 hexanes:EtOAc).

$^1\text{H}$  NMR (600 MHz,  $\text{CDCl}_3$ ):  $\delta$  6.88 (s, 2H), 5.09 (d,  $J = 8.6$  Hz, 1H), 4.28 – 4.15 (m, 2H), 3.91 (t,  $J = 8.2$  Hz, 1H), 3.10 (d,  $J = 5.0$  Hz, 2H), 3.00 – 2.95 (m, 2H), 2.65 – 2.58 (m, 7H), 2.35 – 2.30 (m, 1H), 2.29 (s, 3H), 2.27 – 2.13 (m, 3H), 1.28 (t,  $J = 7.1$  Hz, 3H) ppm.

$^{13}\text{C}$  NMR (151 MHz,  $\text{CDCl}_3$ ):  $\delta$  207.0, 172.5, 141.2, 137.9, 136.9, 131.0, 61.9, 60.7, 59.6, 58.6, 36.8, 36.7, 33.8, 29.3, 21.2, 19.5, 14.3 ppm.

HRMS (ESI-TOF): calc'd for  $\text{C}_{20}\text{H}_{27}\text{NNaO}_4\text{S}$   $[\text{M}+\text{Na}]^+$ : 400.1553, found: 400.1555.

$[\alpha]_{\text{D}}^{20} = +154.0$  ( $c = 1.0$ ,  $\text{CHCl}_3$ ).

## Compound 27

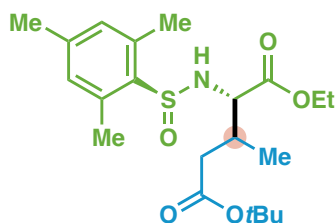

### *5-(tert-butyl) 1-ethyl (2S)-2-(((S)-mesitylsulfinyl)amino)-3-methylpentanedioate* (27)

Following **General Procedure C** on 0.10 mmol scale. Purification by pTLC (2:1 hexanes:EtOAc) afforded 27.2 mg (62%,  $\beta$  dr 1:1) of the title compound **27**.

**Physical State:** colorless oil.

$R_f$  = 0.67 (2:1 hexanes:EtOAc).

**$^1\text{H NMR}$  (500 MHz,  $\text{CDCl}_3$ ):**  $\delta$  6.88 (s, 2H), 6.87 (s, 2H), 5.10 (d,  $J$  = 8.7 Hz, 1H), 5.07 (d,  $J$  = 9.1 Hz, 1H), 4.31 – 4.17 (m, 4H), 4.13 (dd,  $J$  = 8.7, 3.7 Hz, 1H), 3.85 (dd,  $J$  = 9.1, 5.8 Hz, 1H), 2.61 (s, 6H), 2.58 (s, 6H), 2.56 – 2.51 (m, 1H), 2.45 – 2.37 (m, 2H), 2.33 (dd,  $J$  = 15.5, 5.0 Hz, 1H), 2.29 (s, 3H), 2.28 (s, 3H), 2.14 (dd,  $J$  = 15.8, 6.8 Hz, 1H), 2.06 (dd,  $J$  = 15.4, 8.6 Hz, 1H), 1.47 (s, 9H), 1.39 (s, 9H), 1.30 (td,  $J$  = 7.1, 3.6 Hz, 6H), 1.02 (d,  $J$  = 6.7 Hz, 3H), 0.79 (d,  $J$  = 6.9 Hz, 3H) ppm.

**$^{13}\text{C NMR}$  (151 MHz,  $\text{CDCl}_3$ ):**  $\delta$  172.9, 172.8, 171.6, 171.5, 141.13, 141.11, 138.2, 138.0, 136.9, 136.8, 131.0 (2C), 80.9, 80.8, 62.1, 61.90, 61.89, 60.0, 39.3, 38.6, 34.4, 33.7, 28.2, 28.1, 21.18, 21.16, 19.54, 19.46, 16.8, 14.4, 14.30, 14.26 ppm.

**HRMS (ESI-TOF):** calc'd for  $\text{C}_{21}\text{H}_{35}\text{N}_2\text{O}_5\text{S}$   $[\text{M}+\text{H}]^+$ : 412.2152, found: 412.2155.

## Compound 28

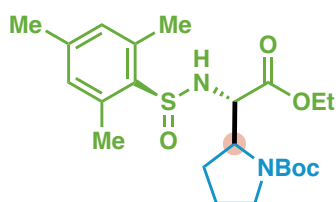

*tert-butyl*

*(2S)-2-(2-ethoxy-1-(((S)-mesitylsulfinyl)amino)-2-oxoethyl)pyrrolidine-1-carboxylate*

*e* (28)

Following **General Procedure C** on 0.10 mmol scale. Purification by pTLC (2:1 hexanes:EtOAc) afforded 39.0 mg (89%,  $\beta$  dr 1:1) of the title compound **28**.

**Physical State:** colorless oil.

$R_f$  = 0.48 (2:1 hexanes:EtOAc).

**$^1\text{H}$  NMR (600 MHz,  $\text{CDCl}_3$ ):**  $\delta$  6.89 – 6.68 (m, 4H), 5.45 (d,  $J$  = 8.3 Hz, 1H), 5.36 (d,  $J$  = 7.6 Hz, 1H), 5.23 (d,  $J$  = 6.9 Hz, 1H), 5.08 (d,  $J$  = 8.7 Hz, 1H), 4.80 – 4.74 (m, 1H), 4.71 – 4.61 (m, 1H), 4.35 – 4.27 (m, 1H), 4.26 – 4.11 (m, 4H), 4.10 – 4.04 (m, 2H), 4.00 (br s, 1H), 3.51 – 3.29 (m, 2H), 3.18 (br s, 1H), 3.12 – 3.06 (m, 1H), 2.58 – 2.44 (m, 12H), 2.27 – 2.13 (m, 6H), 1.97 – 1.88 (m, 1H), 1.83 – 1.71 (m, 4H), 1.68 – 1.56 (m, 3H), 1.51 – 1.35 (m, 18H), 1.28 – 1.17 (m, 6H) ppm (2 rotamers for each diastereomer reported).

**$^{13}\text{C}$  NMR (151 MHz,  $\text{CDCl}_3$ ):**  $\delta$  172.1, 171.9, 171.8, 171.7, 155.2, 154.3, 154.0, 153.8, 140.9, 140.9, 140.7, 140.6, 138.5, 138.2, 137.6, 137.6, 136.8, 136.6, 136.5, 136.4, 130.8, 130.7, 80.3, 80.1, 79.6, 62.0, 61.9, 61.9, 61.5, 60.0, 59.4, 59.3, 59.1, 59.1, 58.6, 57.7, 57.2, 47.5, 47.3, 47.1, 46.6, 28.5, 28.4, 28.3, 27.6, 26.7, 26.0, 24.1, 23.7, 23.6, 22.6, 21.0, 20.9, 19.4, 19.3, 19.2, 19.2, 14.1, 13.9 ppm (2 rotamers for each diastereomer reported).

**HRMS (ESI-TOF):** calc'd for  $\text{C}_{22}\text{H}_{34}\text{N}_2\text{NaO}_5\text{S}$   $[\text{M}+\text{Na}]^+$ : 461.2081, found: 461.2079.

**Compound 29**

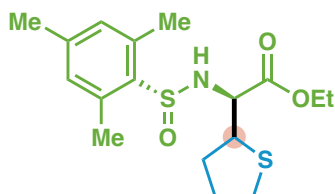

*ethyl (S)-2-(((R)-mesitylsulfinyl)amino)-2-((S)-tetrahydrothiophen-2-yl)acetate (29)*

Following **General Procedure D** on 0.10 mmol scale. Purification by column chromatography (silica gel, 20:10:1 heptanes:EtOAc:Et<sub>3</sub>N) afforded 24.9 mg (70%,  $\beta$

dr 1:1) of the title compound **29**.

**Physical State:** colorless oil.

$R_f$  = 0.45 (2:1 heptanes:EtOAc).

**$^1\text{H}$  NMR (400 MHz,  $\text{CD}_2\text{Cl}_2$ ):**  $\delta$  6.88 (s, 4H), 5.20 (d,  $J$  = 10.2 Hz, 1H), 5.08 (d,  $J$  = 8.9 Hz, 1H), 4.28 – 4.11 (m, 4H), 3.96 – 3.91 (m, 2H), 3.74 – 3.65 (m, 2H), 2.82 (t,  $J$  = 6.1 Hz, 2H), 2.79 – 2.73 (m, 2H), 2.57 (s, 6H), 2.56 (s, 6H), 2.29 (s, 6H), 2.16 – 2.06 (m, 2H), 2.06 – 1.95 (m, 2H), 1.95 – 1.82 (m, 4H), 1.28 (q,  $J$  = 7.0 Hz, 6H) ppm.

**$^{13}\text{C}$  NMR (101 MHz,  $\text{CD}_2\text{Cl}_2$ ):**  $\delta$  172.5, 172.4, 141.5 (2C), 138.8, 138.6, 137.31, 137.26, 131.3 (2C), 62.5, 62.4, 62.3, 62.2, 52.5, 51.4, 34.5, 33.5, 33.3, 33.2, 31.7, 30.9, 21.3, 19.7, 19.6, 14.5 ppm.

**HRMS (ESI-TOF):** calc'd for  $\text{C}_{17}\text{H}_{26}\text{NO}_3\text{S}_2$   $[\text{M}+\text{H}]^+$ : 356.1349, found: 356.1342.

### Compound 30

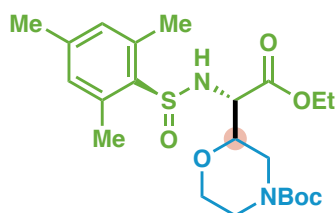

*tert-butyl*

**(2R)-2-(2-ethoxy-1-(((S)-mesitylsulfinyl)amino)-2-oxoethyl)morpholine-4-carboxylate (30)**

Following **General Procedure D** on 0.10 mmol scale. Purification by column chromatography (silica gel, gradient from 4:1 to 1:1 hexanes:EtOAc) afforded 20.5 mg (45%,  $\beta$  dr 1:1) of the title compound **30**.

**Physical State:** colorless oil.

$R_f$  = 0.19 (2:1 hexanes:EtOAc).

**$^1\text{H}$  NMR (600 MHz,  $\text{CDCl}_3$ ):**  $\delta$  6.86 (s, 2H), 6.85 (s, 2H), 5.24 (d,  $J$  = 9.2 Hz, 1H), 5.11 (d,  $J$  = 9.5 Hz, 1H), 4.31 – 4.18 (m, 5H), 4.01 – 3.94 (m, 3H), 3.87 – 3.77 (m, 5H), 3.56 (br s, 1H), 3.45 (t,  $J$  = 11.4 Hz, 2H), 2.96 (br s, 2H), 2.85 (br s, 2H), 2.60 (s, 6H), 2.57 (s, 6H), 2.28 (s, 6H), 1.46 (s, 9H), 1.43 (s, 9H), 1.31 (t,  $J$  = 7.2 Hz, 3H),

1.28 (t,  $J = 7.2$  Hz, 3H) ppm.

$^{13}\text{C}$  NMR (151 MHz,  $\text{CDCl}_3$ ):  $\delta$  171.2, 170.7, 154.7 (2C), 141.3, 141.2, 137.6 (2C), 137.0, 136.9, 130.98, 130.96, 80.5, 80.4, 75.8 (2C), 67.0, 66.9, 62.3, 62.2, 59.6 (2C), 59.2 (2C), 29.8 (2C), 28.50, 28.45, 21.16, 21.15, 19.6, 19.4, 14.23, 14.21 ppm.

HRMS (ESI-TOF): calc'd for  $\text{C}_{22}\text{H}_{35}\text{N}_2\text{O}_6\text{S}$   $[\text{M}+\text{H}]^+$ : 455.2210, found: 455.2219.

### Compound 31

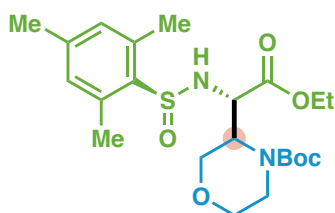

*tert-butyl*

**(3R)-3-(2-ethoxy-1-(((S)-mesitylsulfinyl)amino)-2-oxoethyl)morpholine-4-carboxylate (31)**

Following **General Procedure D** on 0.10 mmol scale. Purification by column chromatography (silica gel, 4:1 hexanes:EtOAc) afforded 32.8 mg (72%,  $\beta$  dr 1:1) of the title compound **31**.

**Physical State:** pale yellow oil.

$R_f = 0.21$  (2:1 hexanes:EtOAc).

$^1\text{H}$  NMR (600 MHz,  $\text{CD}_3\text{OD}$ ):  $\delta$  6.93 – 6.92 (m, 4H), 4.47 – 4.35 (m, 2H), 4.30 – 3.92 (m, 8H), 3.88 (t,  $J = 12.7$  Hz, 2H), 3.83 – 3.63 (m, 2H), 3.59 – 3.57 (m, 2H), 3.51 – 3.33 (m, 4H), 3.28 – 2.99 (m, 2H), 2.57 – 2.56 (m, 12H), 2.28 – 2.27 (m, 6H), 1.43 – 1.41 (m, 6H), 1.33 – 1.29 (m, 6H), 1.16 (s, 6H), 1.10 (s, 6H) ppm (2 rotamers for each diastereomer reported).

$^{13}\text{C}$  NMR (151 MHz,  $\text{CD}_3\text{OD}$ ):  $\delta$  173.7, 173.4, 157.6, 156.5, 143.1, 142.9, 142.6, 138.5, 138.4, 138.4, 138.0, 138.0, 132.0, 131.9, 82.0, 81.8, 67.8, 67.4, 67.3, 66.9, 63.2, 63.0, 62.6, 62.5, 58.3, 57.6, 56.5, 56.2, 55.2, 55.0, 53.4, 41.8, 41.7, 40.2, 40.1, 28.6, 28.5, 28.2, 28.1, 21.1, 21.0, 19.7, 19.7, 19.6, 14.3 ppm (2 rotamers for each diastereomer reported).

**HRMS (ESI-TOF):** calc'd for C<sub>22</sub>H<sub>35</sub>N<sub>2</sub>O<sub>6</sub>S [M+H]<sup>+</sup>: 455.2210, found: 455.2211.

### Compound 32

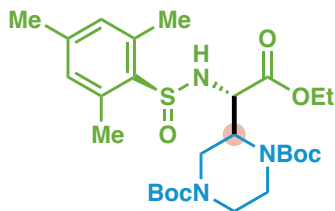

*di-tert-butyl*

*(2S)-2-(2-ethoxy-1-(((S)-mesitylsulfinyl)amino)-2-oxoethyl)piperazine-1,4-dicarboxylate (32)*

Following **General Procedure D** on 0.10 mmol scale. Purification by column chromatography (silica gel, gradient from 9:1 to 4:1 hexanes:EtOAc) afforded 26.0 mg (47%, β dr 1:1) of the title compound **32**.

**Physical State:** pale yellow oil.

**R<sub>f</sub>** = 0.31 (2:1 hexanes:EtOAc).

**<sup>1</sup>H NMR (600 MHz, CD<sub>3</sub>OD):** δ 6.95 – 6.93 (m, 4H), 4.37 – 4.31 (m, 2H), 4.31 – 4.17 (m, 4H), 4.16 – 3.81 (m, 8H), 3.17 – 2.95 (m, 2H), 2.89 – 2.85 (m, 2H), 2.63 – 2.50 (m, 12H), 2.29 – 2.27 (m, 6H), 1.54 – 1.41 (m, 26H), 1.37 – 1.26 (m, 8H), 1.18 (s, 6H), 1.14 (s, 4H) ppm (2 rotamers for each diastereomer reported).

**<sup>13</sup>C NMR (151 MHz, CD<sub>3</sub>OD):** δ 172.9, 157.6, 156.5, 155.9, 155.6, 143.1, 142.9, 142.8, 138.7, 138.3, 138.1, 138.0, 132.1, 131.8, 82.0, 63.3, 63.0, 62.7, 58.5, 57.8, 55.0, 53.9, 53.2, 44.6, 43.3, 41.3, 41.1, 39.8, 39.7, 30.8, 28.6, 28.2, 21.1, 21.0, 19.9, 19.7, 19.6, 14.4, 14.3 ppm.

**HRMS (ESI-TOF):** calc'd for C<sub>27</sub>H<sub>44</sub>N<sub>3</sub>O<sub>7</sub>S [M+H]<sup>+</sup>: 554.2894, found: 554.2898.

### Compound 33

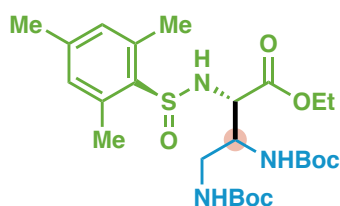

*ethyl*

*(3S)-3,4-bis((tert-butoxycarbonyl)amino)-2-(((S)-mesitylsulfinyl)amino)butanoate*

**(33)**

Following **General Procedure D** on 0.10 mmol scale. Purification by column chromatography (silica gel, gradient from 4:1 to 1:1 hexanes:EtOAc) afforded 25.1 mg (48%,  $\beta$  dr 1:1) of the title compound **33**.

**Physical State:** colorless oil.

$R_f$  = 0.23 (2:1 hexanes:EtOAc).

$^1\text{H NMR}$  (600 MHz,  $\text{CDCl}_3$ ):  $\delta$  6.87 (s, 2H), 6.85 (s, 2H), 5.58 (d,  $J$  = 8.9 Hz, 1H), 5.43 – 5.38 (m, 2H), 4.98 – 4.86 (m, 2H), 4.80 (br s, 1H), 4.24 – 4.07 (m, 8H), 3.36 (br s, 1H), 3.28 (br s, 1H), 3.18 (br s, 2H), 2.60 (s, 6H), 2.59 (s, 6H), 2.28 (s, 3H), 2.27 (s, 3H), 1.42 (s, 9H), 1.41 (s, 9H), 1.39 (s, 9H), 1.36 (s, 9H), 1.28 – 1.23 (m, 6H) ppm.

$^{13}\text{C NMR}$  (151 MHz,  $\text{CDCl}_3$ ):  $\delta$  171.2, 170.7, 156.7, 156.4, 155.64, 155.59, 141.4, 141.1, 137.3, 137.2 (2C), 136.8, 131.12, 131.08, 80.1, 80.0, 79.9, 79.8, 62.5, 62.2, 59.1, 57.6, 53.4, 52.6, 42.2, 40.6, 28.4 (2C), 28.3 (2C), 21.2, 21.1, 19.54, 19.51, 14.2, 14.1 ppm.

**HRMS (ESI-TOF):** calc'd for  $\text{C}_{25}\text{H}_{42}\text{N}_3\text{O}_7\text{S}$   $[\text{M}+\text{H}]^+$ : 528.2738, found: 528.2737.

### Compound 34

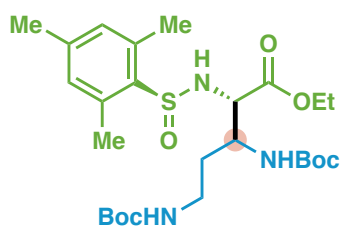



*ethyl*

*(3S)*-3,5-bis(*tert*-butoxycarbonyl)amino)-2-(((*S*)-mesitylsulfinyl)amino)pentanoate

(34)

Following **General Procedure C** on 0.10 mmol scale. Purification by column chromatography (silica gel, gradient from 4:1 to 1:1 hexanes:EtOAc) afforded 32.6 mg (60%,  $\beta$  dr 1:1) of the title compound **34**.

**Physical State:** colorless oil.

$R_f$  = 0.19 (2:1 hexanes:EtOAc).

$^1\text{H NMR}$  (600 MHz,  $\text{CDCl}_3$ ):  $\delta$  6.88 (s, 2H), 6.86 (s, 2H), 5.36 (d,  $J$  = 7.8 Hz, 1H), 5.18 (d,  $J$  = 8.1 Hz, 1H), 5.14 – 5.00 (m, 2H), 4.60 (d,  $J$  = 8.6 Hz, 1H), 4.29 – 4.13 (m, 7H), 4.12 – 4.05 (m, 2H), 3.41 (m, 2H), 2.87 (m, 2H), 2.58 (s, 12H), 2.29 (s, 3H), 2.28 (s, 3H), 1.79 (br s, 2H), 1.60 (br s, 2H), 1.43 (s, 18H), 1.40 (s, 9H), 1.36 (s, 9H), 1.30 – 1.25 (m, 6H) ppm.

$^{13}\text{C NMR}$  (151 MHz,  $\text{CDCl}_3$ ):  $\delta$  171.4, 171.0, 156.1, 156.0, 155.9, 155.7, 141.5, 141.3, 137.7, 137.1, 136.9 (2C), 131.2, 131.1, 80.1, 80.0, 79.4, 79.2, 62.6, 62.4, 60.6, 59.7, 50.6, 49.7, 37.1, 36.9, 33.4, 30.6, 29.8, 28.6, 28.5, 28.4, 28.3, 21.2, 21.1, 19.5, 14.2, 14.1 ppm.

**HRMS (ESI-TOF):** calc'd for  $\text{C}_{26}\text{H}_{44}\text{N}_3\text{O}_7\text{S}$   $[\text{M}+\text{H}]^+$ : 542.2894, found: 542.2903.

### Compound 35

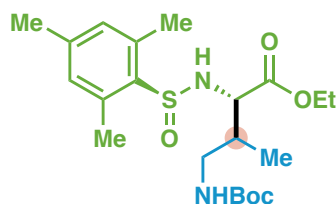

*ethyl*

*(3S)*-4-((*tert*-butoxycarbonyl)amino)-2-(((*S*)-mesitylsulfinyl)amino)-3-methylbutanoate (35)

Following **General Procedure C** on 0.10 mmol scale. Purification by pTLC (2:1 hexanes:EtOAc) afforded 29.0 mg (68%,  $\beta$  dr 1:1) of the title compound **35**.

For 1.0 mmol scale preparation, **General Procedure C** was followed. Purification by column chromatography (silica gel, 4:1 hexanes:EtOAc) afforded 264.0 mg (62%,  $\beta$  dr 1:1) of the title compound **35**.

**Physical State:** colorless oil.

$R_f$  = 0.24 (2:1 hexanes:EtOAc).

**$^1\text{H}$  NMR (500 MHz,  $\text{CDCl}_3$ ):**  $\delta$  6.86 (s, 4H), 5.30 (d,  $J$  = 8.7 Hz, 1H), 5.04 (d,  $J$  = 8.9 Hz, 2H), 4.67 (br s, 1H), 4.26 – 4.15 (m, 4H), 4.07 (dd,  $J$  = 9.0, 3.7 Hz, 1H), 3.88 (dd,  $J$  = 8.7, 4.7 Hz, 1H), 3.21 – 3.17 (m, 1H), 3.11 – 3.03 (m, 3H), 2.60 (s, 6H), 2.59 (s, 6H), 2.29 – 2.23 (m, 8H), 1.45 (s, 9H), 1.41 (s, 9H), 1.29 (t,  $J$  = 7.2 Hz, 3H), 1.23 (t,  $J$  = 7.1 Hz, 3H), 0.98 (d,  $J$  = 6.9 Hz, 3H), 0.76 (d,  $J$  = 6.9 Hz, 3H) ppm.

**$^{13}\text{C}$  NMR (151 MHz,  $\text{CDCl}_3$ ):**  $\delta$  173.0, 172.9, 156.07, 156.05, 141.2, 141.1, 137.9, 137.3, 137.1, 136.9, 131.1, 131.0, 79.53, 79.48, 61.9 (2C), 60.1, 57.8, 43.5, 42.5, 37.8, 36.8, 28.5 (2C), 21.2, 21.1, 19.52, 19.45, 15.3, 14.3, 14.2, 12.1 ppm.

**HRMS (ESI-TOF):** calc'd for  $\text{C}_{21}\text{H}_{35}\text{N}_2\text{O}_5\text{S}$   $[\text{M}+\text{H}]^+$ : 427.2261, found: 427.2267.

### Compound 36

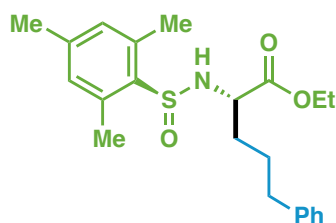

### *ethyl 2-(((S)-mesitylsulfinyl)amino)-5-phenylpentanoate (36)*

Following **General Procedure C** on 0.10 mmol scale. Purification by pTLC (3:1 hexanes:EtOAc) afforded 26.4 mg (68%) of the title compound **36**.

**Physical State:** colorless oil.

$R_f$  = 0.52 (2:1 hexanes:EtOAc).

**$^1\text{H}$  NMR (400 MHz,  $\text{CDCl}_3$ ):**  $\delta$  7.32 – 7.22 (m, 2H), 7.21 – 7.11 (m, 3H), 6.87 (s, 2H), 5.05 (d,  $J$  = 8.4 Hz, 1H), 4.20 (qd,  $J$  = 7.2, 2.9 Hz, 2H), 4.04 – 3.92 (m, 1H), 2.68 – 2.59 (m, 2H), 2.57 (s, 6H), 2.29 (s, 3H), 1.88 – 1.79 (m, 1H), 1.77 – 1.63 (m, 3H),

1.27 (t,  $J = 7.1$  Hz, 3H) ppm.

$^{13}\text{C}$  NMR (151 MHz,  $\text{CDCl}_3$ ):  $\delta$  173.6, 141.8, 141.1, 138.0, 136.8, 131.0, 128.5, 128.5, 126.1, 61.8, 57.2, 35.4, 33.6, 27.2, 21.2, 19.5, 14.2 ppm.

HRMS (ESI-TOF): calc'd for  $\text{C}_{22}\text{H}_{30}\text{NO}_3\text{S}$   $[\text{M}+\text{H}]^+$ : 388.1941, found: 388.1944.

$[\alpha]_{\text{D}}^{20} = +105.5$  ( $c = 1.0$ ,  $\text{CHCl}_3$ ).

For previous AA syntheses, see ref 14.

### Compound 37

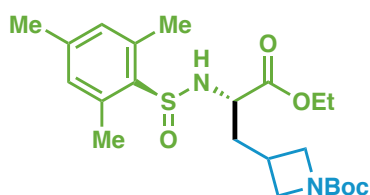

*tert-butyl*

**3-((*S*)-3-ethoxy-2-(((*S*)-mesitylsulfinyl)amino)-3-oxopropyl)azetidine-1-carboxylate**  
(37)

Following **General Procedure C** on 0.10 mmol scale. Purification by pTLC (2:1 hexanes:EtOAc) afforded 23.3 mg (53%) of the title compound **37**.

Following **General Procedure C** on 1.0 mmol scale. Purification by column chromatography (2:1 hexanes:EtOAc) afforded 219.5 mg (50%) of the title compound **37**.

**Physical State:** colorless oil.

$R_f = 0.17$  (2:1 hexanes:EtOAc).

$^1\text{H}$  NMR (400 MHz,  $\text{CDCl}_3$ ):  $\delta$  6.84 (s, 2H), 5.04 (d,  $J = 8.9$  Hz, 1H), 4.19 (q,  $J = 7.2$  Hz, 2H), 4.02 – 3.92 (m, 2H), 3.86 (td,  $J = 8.7, 5.1$  Hz, 1H), 3.58 (dd,  $J = 8.6, 5.7$  Hz, 1H), 3.52 (dd,  $J = 8.6, 5.7$  Hz, 1H), 2.73 – 2.61 (m, 1H), 2.55 (s, 6H), 2.26 (s, 3H), 2.10 – 2.01 (m, 1H), 1.95 – 1.85 (m, 1H), 1.40 (s, 9H), 1.27 (t,  $J = 7.2$  Hz, 3H) ppm.

$^{13}\text{C}$  NMR (151 MHz,  $\text{CDCl}_3$ ):  $\delta$  173.0, 156.3, 141.2, 137.6, 136.7, 131.0, 79.5, 62.0, 56.0, 54.3, 38.5, 28.4, 25.9, 21.1, 19.3, 14.1 ppm.

HRMS (ESI-TOF): calc'd for  $\text{C}_{22}\text{H}_{35}\text{N}_2\text{O}_5\text{S}$   $[\text{M}+\text{H}]^+$ : 439.2261, found: 439.2256.

$[\alpha]_{\text{D}}^{20} = +88.4$  ( $c = 1.0$ ,  $\text{CHCl}_3$ ).

### Compound 38

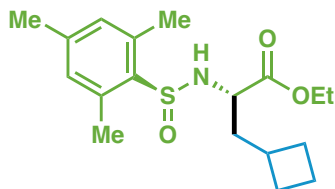

#### *ethyl 3-cyclobutyl-2-(((S)-mesitylsulfinyl)amino)propanoate (38).*

Following **General Procedure C** on 0.10 mmol scale. Purification by column chromatography (silica gel, gradient from 9:1 to 4:1 hexanes:EtOAc) afforded 17.9 mg (53%) of the title compound **38**.

**Physical State:** pale yellow solid.

**m.p.:** >180 °C.

**R<sub>f</sub>** = 0.49 (2:1 hexanes:EtOAc).

**<sup>1</sup>H NMR (600 MHz, CDCl<sub>3</sub>):** δ 6.86 (s, 2H), 5.00 (d,  $J = 8.9$  Hz, 1H), 4.19 (q,  $J = 7.1$  Hz, 2H), 3.86 (td,  $J = 8.6, 5.1$  Hz, 1H), 2.59 (s, 6H), 2.50 – 2.42 (m, 1H), 2.28 (s, 3H), 2.07 – 1.99 (m, 2H), 1.89 – 1.58 (m, 6H), 1.29 (t,  $J = 7.1$  Hz, 3H) ppm.

**<sup>13</sup>C NMR (151 MHz, CDCl<sub>3</sub>):** δ 173.9, 141.0, 138.1, 136.8, 130.9, 61.7, 56.2, 41.2, 32.5, 28.4, 28.2, 21.2, 19.4, 18.6, 14.2 ppm.

**HRMS (ESI-TOF):** calc'd for C<sub>18</sub>H<sub>28</sub>NO<sub>3</sub>S [M+H]<sup>+</sup>: 338.1784, found: 338.1790.

$[\alpha]_{\text{D}}^{20} = +97.0$  ( $c = 0.1$ ,  $\text{CH}_2\text{Cl}_2$ ).

### Compound 39

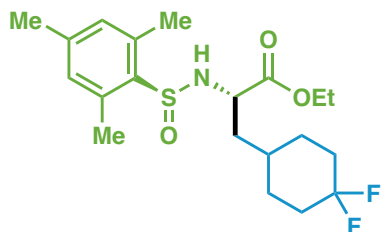

#### *ethyl 3-(4,4-difluorocyclohexyl)-2-(((S)-mesitylsulfinyl)amino)propanoate (39)*

Following **General Procedure C** on 0.10 mmol scale. Purification by pTLC (3:1 hexanes:EtOAc) afforded 19.3 mg (48%) of the title compound **39**.

Following **General Procedure C** on 1.0 mmol scale. Purification by column chromatography (2:1 hexanes:EtOAc) afforded 216.2 mg (51%) of the title compound **39**.

**Physical State:** colorless oil.

$R_f = 0.50$  (2:1 hexanes:EtOAc).

$^1\text{H NMR}$  (500 MHz,  $\text{CDCl}_3$ ):  $\delta$  6.88 (s, 2H), 5.02 (d,  $J = 9.2$  Hz, 1H), 4.27 – 4.15 (m, 2H), 4.03 – 3.95 (m, 1H), 2.58 (s, 6H), 2.29 (s, 3H), 2.18 – 2.00 (m, 2H), 1.92 – 1.84 (m, 1H), 1.74 – 1.64 (m, 5H), 1.58 – 1.53 (m, 1H), 1.37 – 1.22 (m, 5H) ppm.

$^{13}\text{C NMR}$  (151 MHz,  $\text{CDCl}_3$ ):  $\delta$  173.9, 141.3, 137.9, 136.8, 131.1, 123.5 (t,  $J = 241.4$  Hz), 62.0, 55.6, 39.96, 39.95, 33.5 (m), 32.2, 29.4 (d,  $J = 9.4$  Hz), 28.0 (d,  $J = 9.4$  Hz), 21.1, 19.4, 14.2 ppm.

$^{19}\text{F NMR}$  (376 MHz,  $\text{CDCl}_3$ ):  $\delta$  -92.08 (d,  $J = 235.7$  Hz), -102.46 (d,  $J = 234.9$  Hz) ppm.

**HRMS (ESI-TOF):** calc'd for  $\text{C}_{20}\text{H}_{29}\text{F}_2\text{NNaO}_3\text{S}$   $[\text{M}+\text{Na}]^+$ : 424.1728, found: 424.1734.

$[\alpha]_D^{20} = +28.0$  ( $c = 1.0$ ,  $\text{CHCl}_3$ ).

### Compound 40

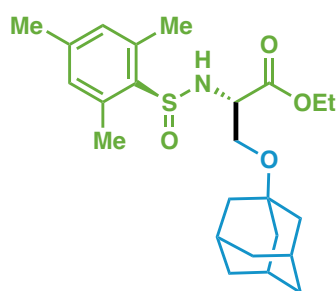

### *ethyl O-((3R,5R,7R)-adamantan-1-yl)-N-((S)-mesitylsulfinyl)-L-serinate (40)*

Following **General Procedure D** on 0.10 mmol scale. Purification by pTLC (3:1 hexanes:EtOAc) afforded 23.0 mg (53%) of the title compound **40**.

**Physical State:** pale yellow oil.

$R_f = 0.61$  (2:1 hexanes:EtOAc).

$^1\text{H NMR}$  (600 MHz,  $\text{CDCl}_3$ ):  $\delta$  6.84 (s, 2H), 5.19 (d,  $J = 8.0$  Hz, 1H), 4.26 – 4.15 (m, 2H), 4.14 – 4.09 (m, 1H), 3.76 (dd,  $J = 9.1, 4.7$  Hz, 1H), 3.70 (dd,  $J = 9.1, 4.2$  Hz, 1H), 2.59 (s, 6H), 2.27 (s, 3H), 2.11 (s, 3H), 1.68 – 1.54 (m, 12H), 1.27 (t,  $J = 7.2$  Hz, 3H) ppm.

$^{13}\text{C NMR}$  (151 MHz,  $\text{CDCl}_3$ ):  $\delta$  171.6, 140.9, 137.7, 137.1, 130.9, 72.8, 62.1, 61.7, 57.9, 41.4, 36.5, 30.6, 21.1, 19.6, 14.3 ppm.

**HRMS (ESI-TOF)**: calc'd for  $\text{C}_{24}\text{H}_{36}\text{NO}_4\text{S}$   $[\text{M}+\text{H}]^+$ : 434.2360, found: 439.2364.

$[\alpha]_D^{20} = +62.5$  ( $c = 1.0$ ,  $\text{CHCl}_3$ ).

### Compound 41

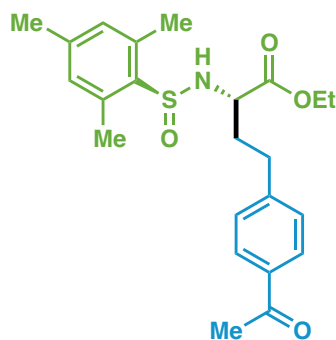

### *ethyl (S)-4-(4-acetylphenyl)-2-(((S)-mesitylsulfinyl)amino)butanoate (41)*

Following **General Procedure C** on 0.10 mmol scale. Purification by pTLC (3:1 hexanes:EtOAc) afforded 23.7 mg (57%) of the title compound **41**.

**Physical State**: colorless oil.

$R_f = 0.26$  (2:1 hexanes:EtOAc).

$^1\text{H NMR}$  (600 MHz,  $\text{CDCl}_3$ ):  $\delta$  7.91 – 7.86 (m, 2H), 7.28 – 7.23 (m, 2H), 6.89 (s, 2H), 5.14 (d,  $J = 8.4$  Hz, 1H), 4.21 (qd,  $J = 7.1, 1.9$  Hz, 2H), 3.99 (td,  $J = 8.4, 4.6$  Hz, 1H), 2.84 – 2.75 (m, 2H), 2.61 (s, 6H), 2.58 (s, 3H), 2.30 (s, 3H), 2.19 – 2.10 (m, 1H), 2.01 – 1.93 (m, 1H), 1.28 (t,  $J = 7.1$  Hz, 3H) ppm.

$^{13}\text{C NMR}$  (151 MHz,  $\text{CDCl}_3$ ):  $\delta$  197.9, 173.2, 146.6, 141.3, 137.9, 136.9, 135.6, 131.1, 128.83, 128.81, 62.0, 56.7, 35.3, 31.8, 26.7, 21.2, 19.5, 14.3 ppm.

**HRMS (ESI-TOF)**: calc'd for  $\text{C}_{23}\text{H}_{30}\text{NO}_4\text{S}$   $[\text{M}+\text{H}]^+$ : 416.1890, found: 416.1898.

$[\alpha]_{\text{D}}^{20} = +21.6$  ( $c = 1.0$ ,  $\text{CHCl}_3$ ).

### Compound 42

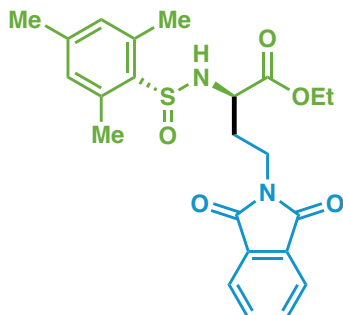

#### *ethyl (R)-4-(1,3-dioxoisindolin-2-yl)-2-(((R)-mesitylsulfinyl)amino)butanoate (42)*

Following **General Procedure C** on 0.10 mmol scale. Purification by column chromatography (silica gel, gradient from 9:1 to 1:1 heptanes:EtOAc) afforded 20 mg (45%) of the title compound **42**.

**Physical State:** colorless oil.

$R_f = 0.3$  (7:3 heptanes:EtOAc).

$^1\text{H NMR}$  (400 MHz,  $\text{DMSO-}d_6$ ):  $\delta$  7.87 – 7.81 (m, 4H), 6.89 (s, 2H), 6.64 (d,  $J = 9.3$  Hz, 1H), 3.99 – 3.85 (m, 3H), 3.67 (t,  $J = 6.4$  Hz, 2H), 2.24 (s, 3H), 2.12 – 2.05 (m,  $J = 6.7$  Hz, 1H), 2.03 – 1.91 (m, 1H), 1.14 – 1.08 (m, 3H) ppm.

6H were obscured by the residual solvent signal at 2.50 ppm.

$^{13}\text{C NMR}$  (101 MHz,  $\text{DMSO-}d_6$ ):  $\delta$  171.9, 167.8, 139.9, 137.3, 136.6, 134.3, 131.6, 130.3, 122.95, 60.6, 55.2, 34.4, 31.3, 20.5, 18.9, 13.8 ppm.

**HRMS (ESI-TOF):** calc'd for  $\text{C}_{23}\text{H}_{27}\text{N}_2\text{O}_5\text{S}$   $[\text{M}+\text{H}]^+$ : 443.1635, found: 443.1649.

$[\alpha]_{\text{D}}^{22} = -54.8$  ( $c = 0.1$ , MeOH).

### Compound 43

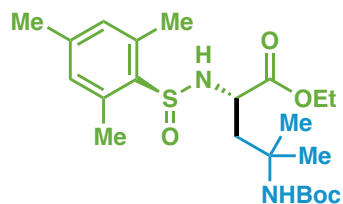

*ethyl*

**4-((tert-butoxycarbonyl)amino)-2-(((S)-mesitylsulfinyl)amino)-4-methylpentanoate**  
**(43)**

Following **General Procedure C** on 0.10 mmol scale. Purification by column chromatography (silica gel, 4:1 hexanes:EtOAc) afforded 16.0 mg (36%) of the title compound **43**.

**Physical State:** colorless oil.

$R_f = 0.35$  (2:1 hexanes:EtOAc).

$^1\text{H NMR}$  (600 MHz,  $\text{CDCl}_3$ ):  $\delta$  6.85 (s, 2H), 5.06 (d,  $J = 10.4$  Hz, 1H), 4.89 (br s, 1H), 4.19 (q,  $J = 7.1$  Hz, 2H), 4.08 – 4.00 (m, 1H), 2.59 (s, 6H), 2.27 (s, 3H), 2.10 (dd,  $J = 14.5, 3.8$  Hz, 1H), 1.87 (dd,  $J = 14.6, 8.8$  Hz, 1H), 1.63 (br s, 1H), 1.38 (s, 11H), 1.34 (s, 3H), 1.28 (t,  $J = 7.1$  Hz, 3H) ppm.

$^{13}\text{C NMR}$  (151 MHz,  $\text{CDCl}_3$ ):  $\delta$  174.0, 154.4, 141.3, 137.6, 137.0, 131.0, 79.1, 61.9, 55.2, 52.3, 43.8, 28.5, 28.2, 21.2, 19.5, 14.2 ppm.

**HRMS (ESI-TOF):** calc'd for  $\text{C}_{22}\text{H}_{37}\text{N}_2\text{O}_5\text{S}$   $[\text{M}+\text{H}]^+$ : 441.2418, found: 441.2426.

$[\alpha]_D^{20} = +64.4$  ( $c = 0.5$ ,  $\text{CH}_2\text{Cl}_2$ ).

**Compound 44**

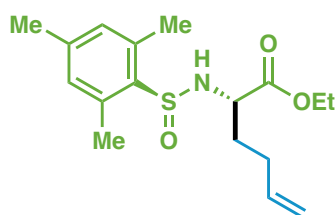

**ethyl 2-(((S)-mesitylsulfinyl)amino)hex-5-enoate (44)**

Following **General Procedure D** on 0.10 mmol scale. Purification by column chromatography (silica gel, 20:10:1 heptanes:EtOAc:Et<sub>3</sub>N) afforded 20.4 mg (63%) of the title compound **44**.

Cyclopropyl opening: Following **General Procedure C** on 0.10 mmol scale. Purification by column chromatography using gradient from 9:1 to 2:1 hexanes:EtOAc afforded 4.9 mg (15%) of the title compound **44**.



**Physical State:** colorless oil.

$R_f = 0.67$  (2:1 hexanes:EtOAc).

$^1\text{H NMR}$  (400 MHz,  $\text{CD}_2\text{Cl}_2$ ):  $\delta$  6.89 (s, 2H), 5.81 (ddt,  $J = 16.9, 10.2, 6.6$  Hz, 1H), 5.09 – 4.96 (m, 3H), 4.26 – 4.12 (m, 2H), 3.93 (td,  $J = 8.7, 4.8$  Hz, 1H), 2.56 (s, 6H), 2.29 (s, 3H), 2.17 (q,  $J = 7.4$  Hz, 2H), 1.93 – 1.84 (m, 1H), 1.76 – 1.67 (m, 1H), 1.28 (t,  $J = 7.2$  Hz, 3H) ppm.

$^{13}\text{C NMR}$  (101 MHz,  $\text{CD}_2\text{Cl}_2$ ):  $\delta$  174.0, 141.5, 138.7, 137.8, 137.3, 131.3, 116.1, 62.1, 57.5, 33.8, 30.1, 21.3, 19.6, 14.5 ppm.

**HRMS (ESI-TOF):** calc'd for  $\text{C}_{17}\text{H}_{26}\text{NO}_3\text{S}$   $[\text{M}+\text{H}]^+$ : 324.1628, found: 324.1629.

$[\alpha]_D^{20} = +37.1$  ( $c = 0.5$ ,  $\text{CH}_2\text{Cl}_2$ ).

#### Compound 45

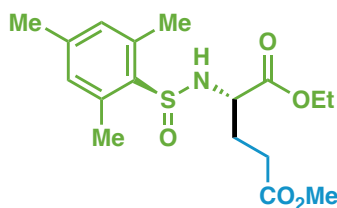

#### *1-ethyl 5-methyl ((S)-mesitylsulfinyl)glutamate (45)*

Following **General Procedure C** on 0.10 mmol scale. Purification by pTLC (2:1 hexanes:EtOAc) afforded 15.7 mg (44%) of the title compound **45**.

**Physical State:** colorless oil.

$R_f = 0.30$  (2:1 hexanes:EtOAc).

$^1\text{H NMR}$  (600 MHz,  $\text{CDCl}_3$ ):  $\delta$  6.87 (s, 2H), 5.07 (d,  $J = 8.6$  Hz, 1H), 4.23 (qd,  $J = 7.2, 2.5$  Hz, 2H), 4.02 (td,  $J = 8.7, 4.8$  Hz, 1H), 3.62 (s, 3H), 2.58 (s, 6H), 2.50 – 2.38 (m, 2H), 2.28 (s, 3H), 2.22 – 2.14 (m, 1H), 1.98 – 1.90 (m, 1H), 1.29 (t,  $J = 7.1$  Hz, 3H) ppm.

$^{13}\text{C NMR}$  (151 MHz,  $\text{CDCl}_3$ ):  $\delta$  173.2, 173.0, 141.2, 137.9, 136.8, 131.0, 62.1, 56.7, 51.9, 30.1, 29.0, 21.2, 19.4, 14.2 ppm.

**HRMS (ESI-TOF):** calc'd for  $\text{C}_{17}\text{H}_{26}\text{NO}_5\text{S}$   $[\text{M}+\text{H}]^+$ : 356.1526, found: 356.1531.

$[\alpha]_D^{20} = +25.2$  ( $c = 1.0$ ,  $\text{CHCl}_3$ ).

### Compound 46

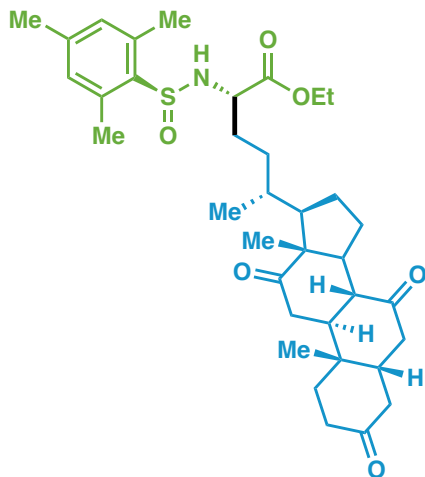

*ethyl*

*(5R)-5-((5S,8R,9S,10S,13R,17R)-10,13-dimethyl-3,7,12-trioxohexadecahydro-1H-cyclopenta[a]phenanthren-17-yl)-2-(((S)-mesitylsulfinyl)amino)hexanoate (46)*

Following **General Procedure C** on 0.10 mmol scale. Purification by pTLC (2:1 hexanes:EtOAc) afforded 52.0 mg (83%) of the title compound **46**.

**Physical State:** colorless oil.

$R_f = 0.62$  (2:1 hexanes:EtOAc).

$^1\text{H NMR}$  (600 MHz,  $\text{CDCl}_3$ ):  $\delta$  6.90 – 6.82 (s, 2H), 5.04 (d,  $J = 8.1$  Hz, 1H), 4.27 – 4.15 (m, 2H), 3.96 – 3.87 (m, 1H), 3.40 – 3.34 (m, 4H), 2.94 – 2.86 (m, 1H), 2.83 (s, 6H), 2.62 – 2.55 (m, 5H), 2.42 – 1.79 (m, 11H), 1.74 (s, 3H), 1.63 – 1.54 (m, 1H), 1.38 (m, 3H), 1.28 (t,  $J = 7.1$  Hz, 3H), 1.25 – 1.19 (m, 2H), 1.04 (s, 3H), 0.82 (d,  $J = 6.4$  Hz, 3H) ppm.

$^{13}\text{C NMR}$  (151 MHz,  $\text{CDCl}_3$ ):  $\delta$  212.0, 209.1, 208.9, 173.6, 141.1, 138.0, 137.0, 131.0, 61.8, 57.6, 57.0, 51.9, 49.1, 47.0, 45.74, 45.71, 45.1, 42.9, 38.8, 36.6, 36.2, 36.0, 35.4, 31.2, 31.1, 27.8, 25.3, 22.0, 21.2, 19.5, 19.1, 14.3, 11.9 ppm.

**HRMS (ESI-TOF):** calc'd for  $\text{C}_{36}\text{H}_{52}\text{NO}_6\text{S}$   $[\text{M}+\text{H}]^+$ : 626.3510, found: 626.3511.

$[\alpha]_D^{20} = +59.0$  ( $c = 1.0$ ,  $\text{CHCl}_3$ ).

## Compound 47

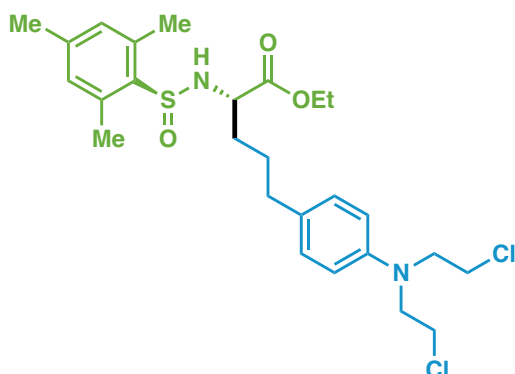

*ethyl*

### *5-(4-(bis(2-chloroethyl)amino)phenyl)-2-(((S)-mesitylsulfinyl)amino)pentanoate* (47)

Following **General Procedure C** on 0.10 mmol scale. Purification by pTLC (3:1 hexanes:EtOAc) afforded 30.6 mg (58%) of the title compound **47**.

**Physical State:** yellow oil.

$R_f$  = 0.48 (2:1 hexanes:EtOAc).

**$^1\text{H}$  NMR (400 MHz,  $\text{CDCl}_3$ ):**  $\delta$  7.07 – 6.99 (m, 2H), 6.87 (s, 2H), 6.65 – 6.55 (m, 2H), 5.04 (d,  $J$  = 8.5 Hz, 1H), 4.20 (qd,  $J$  = 7.2, 2.8 Hz, 2H), 4.03 – 3.92 (m, 1H), 3.72 – 3.67 (m, 4H), 3.65 – 3.57 (m, 4H), 2.58 (s, 6H), 2.57 – 2.48 (m, 2H), 2.29 (s, 3H), 1.89 – 1.77 (m, 1H), 1.73 – 1.63 (m, 3H), 1.28 (t,  $J$  = 7.2 Hz, 3H) ppm.

**$^{13}\text{C}$  NMR (151 MHz,  $\text{CDCl}_3$ ):**  $\delta$  173.6, 144.4, 141.1, 138.0, 136.8, 130.98, 130.96, 129.7, 112.3, 61.8, 57.3, 53.7, 40.6, 34.3, 33.7, 27.4, 21.2, 19.5, 14.3 ppm.

**HRMS (ESI-TOF):** calc'd for  $\text{C}_{26}\text{H}_{37}\text{Cl}_2\text{N}_2\text{O}_3\text{S}$   $[\text{M}+\text{H}]^+$ : 527.1896, found: 527.1907.

$[\alpha]_D^{20}$  = +11.2 ( $c$  = 1.0,  $\text{CHCl}_3$ ).

## Compound 48

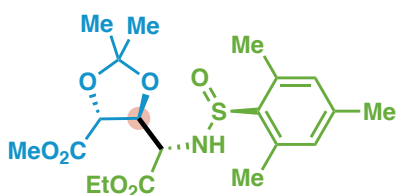

*methyl*

**(4*R*,5*S*)-5-(2-ethoxy-1-(((*S*)-mesitylsulfinyl)amino)-2-oxoethyl)-2,2-dimethyl-1,3-dioxolane-4-carboxylate (48)**

Following the **General Procedure D** (*in situ*) on 0.10 mmol scale at rt. Purification by pTLC (6:1 CH<sub>2</sub>Cl<sub>2</sub>:Et<sub>2</sub>O) afforded 22.5 mg (53%, β dr 10:1) of the title compound **48**.

**Physical State:** colorless oil.

*R<sub>f</sub>* = 0.54 (6:1 CH<sub>2</sub>Cl<sub>2</sub>:Et<sub>2</sub>O).

<sup>1</sup>H NMR (600 MHz, CDCl<sub>3</sub>): δ 6.86 (s, 2H), 5.26 (d, *J* = 9.3 Hz, 1H), 4.60 (d, *J* = 7.6 Hz, 1H), 4.52 (dd, *J* = 7.6, 2.3 Hz, 1H), 4.28 – 4.18 (m, 3H), 3.83 (s, 3H), 2.60 (s, 6H), 2.28 (s, 3H), 1.38 (s, 3H), 1.31 (s, 3H), 1.26 (t, *J* = 7.1 Hz, 3H) ppm.

<sup>13</sup>C NMR (151 MHz, CDCl<sub>3</sub>): δ 170.8, 170.2, 141.2, 137.3, 137.0, 131.1, 112.1, 79.3, 75.5, 62.4, 57.1, 52.8, 26.6, 25.9, 21.2, 19.5, 14.2 ppm.

**HRMS (ESI-TOF):** calc'd for C<sub>20</sub>H<sub>29</sub>NNaO<sub>7</sub>S<sup>+</sup> [M+Na]<sup>+</sup> 450.1557; found 450.1558.

[α]<sub>D</sub><sup>20</sup> = +71.0 (*c* = 1.0, CHCl<sub>3</sub>).

For previous AA syntheses, see ref 15.

## Compound 49

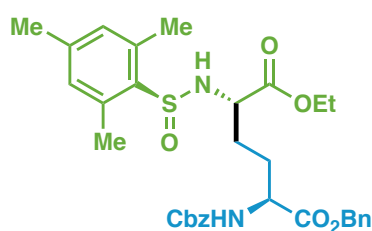

*1-benzyl*

*6-ethyl*

**(2*S*)-2-(((benzyloxy)carbonyl)amino)-5-(((*S*)-mesitylsulfinyl)amino)hexanedioate**

***1-benzyl 7-ethyl (49)***

Following **General Procedure C** on 0.10 mmol scale. Purification by pTLC (2:1 hexanes:EtOAc) afforded 38.2 mg (63%) of the title compound **49**.

**Physical State:** colorless oil.

$R_f$  = 0.26 (2:1 hexanes:EtOAc).

$^1\text{H NMR}$  (600 MHz,  $\text{CDCl}_3$ ):  $\delta$  7.39 – 7.26 (m, 10H), 6.85 (s, 2H), 5.34 (d,  $J$  = 8.2 Hz, 1H), 5.19 – 5.07 (m, 4H), 4.97 (d,  $J$  = 8.3 Hz, 1H), 4.53 – 4.37 (m, 1H), 4.18 (q,  $J$  = 7.1 Hz, 2H), 3.95 – 3.86 (m, 1H), 2.53 (s, 6H), 2.29 (s, 3H), 2.03 – 1.94 (m, 1H), 1.93 – 1.84 (m, 1H), 1.83 – 1.70 (m, 1H), 1.60 – 1.50 (m, 1H), 1.25 (t,  $J$  = 7.1 Hz, 3H) ppm.

$^{13}\text{C NMR}$  (151 MHz,  $\text{CDCl}_3$ ):  $\delta$  172.9, 171.9, 156.0, 141.2, 137.7, 136.9, 136.2, 135.2, 131.0, 128.8, 128.7, 128.5, 128.4, 128.3, 67.5, 67.2, 62.1, 56.7, 53.6, 29.6, 28.9, 21.2, 19.4, 14.2 ppm.

**HRMS (ESI-TOF)**: calc'd for  $\text{C}_{32}\text{H}_{39}\text{N}_2\text{O}_7\text{S}$   $[\text{M}+\text{H}]^+$ : 595.2472, found: 595.2476.

$[\alpha]_D^{20}$  = +135.4 ( $c$  = 1.0,  $\text{CHCl}_3$ ).

For previous AA synthesis, see ref 16.

### Compound 50

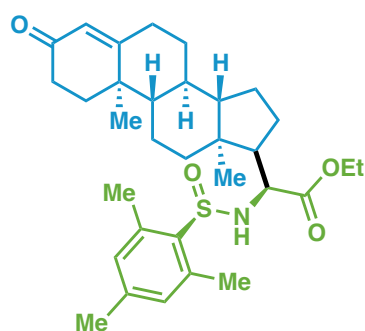

*ethyl*

*(S)*-2-((*8S,9S,10R,13S,14S,17R*)-10,13-dimethyl-3-oxo-2,3,6,7,8,9,10,11,12,13,14,15,16,17-tetradecahydro-1*H*-cyclopenta[*a*]phenanthren-17-yl)-2-(((*S*)-mesitylsulfinyl)amino)acetate (**50**)

Following **General Procedure D** on 0.10 mmol scale. Purification by pTLC (2:1 hexanes:EtOAc) afforded 22.8 mg (42%,  $\beta$  dr 16:1) of the title compound **50**.

**Physical State**: white solid.

**m.p.**: 132 – 134 °C.

$R_f$  = 0.30 (2:1 hexanes:EtOAc).

**<sup>1</sup>H NMR (600 MHz, CDCl<sub>3</sub>):** δ 6.86 (s, 2H), 5.71 (d, *J* = 1.6 Hz, 1H), 4.91 (d, *J* = 10.2 Hz, 1H), 4.21 (dt, *J* = 7.0, 3.5 Hz, 2H), 4.03 (dd, *J* = 10.2, 3.4 Hz, 1H), 2.56 (s, 6H), 2.47 – 2.30 (m, 3H), 2.27 (s, 3H), 2.24-2.18 (m, 1H), 2.09 – 2.02 (m, 2H), 1.81-1.74 (m, 1H), 1.73-1.69 (m, 2H), 1.67-1.58 (m, 4H), 1.54-1.45 (m, 2H), 1.44-1.37 (m, 1H), 1.36 – 1.31 (m, 1H), 1.28 (t, *J* = 7.1 Hz, 3H), 1.26 – 1.19 (m, 1H), 1.17 (s, 3H), 0.87 – 0.75 (m, 5H) ppm.

**<sup>13</sup>C NMR (151 MHz, CDCl<sub>3</sub>):** δ 199.7, 174.1, 171.3, 141.3, 138.1, 136.9, 131.0, 123.9, 61.8, 58.2, 53.8, 51.3, 50.3, 44.0, 38.8, 36.1, 36.0, 34.1, 33.3, 33.0, 32.6, 26.0, 22.5, 21.3, 21.2, 21.1, 19.5, 17.5, 14.2 ppm.

**HRMS (ESI-TOF):** calc'd for C<sub>32</sub>H<sub>46</sub>NO<sub>4</sub>S [M+H]<sup>+</sup>: 540.3142, found: 540.3145.

[α]<sub>D</sub><sup>20</sup> = +23.3 (*c* = 1.0, CHCl<sub>3</sub>).

### Compound 51

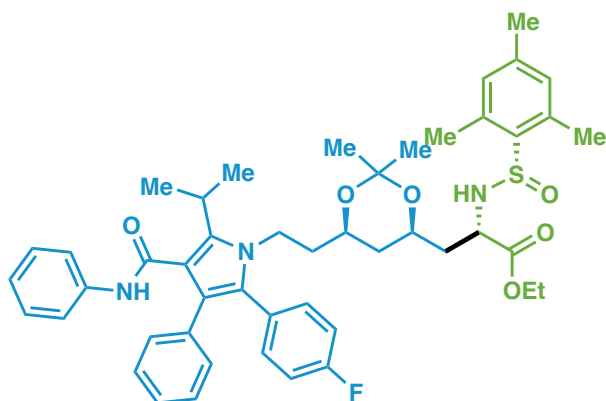

*ethyl*

*(S)*-3-((*4S,6R*)-6-(2-(2-(4-fluorophenyl)-5-isopropyl-3-phenyl-4-(phenylcarbamoyl)-1*H*-pyrrol-1-yl)ethyl)-2,2-dimethyl-1,3-dioxan-4-yl)-2-((*S*)-mesitylsulfinyl)amino)propanoate (**51**)

Following **General Procedure C** on 0.10 mmol scale. Purification by pTLC (2:1 hexanes:EtOAc) afforded 43.4 mg (53%) of the title compound **51**.

**Physical State:** colorless oil.

*R<sub>f</sub>* = 0.45 (2:1 hexanes:EtOAc).

**<sup>1</sup>H NMR (600 MHz, CDCl<sub>3</sub>):** δ 7.22 – 7.13 (m, 10H), 7.06 (d, *J* = 8.0 Hz, 2H), 6.99 – 6.94 (m, 2H), 6.86 (s, 2H), 5.14 (d, *J* = 9.6 Hz, 1H), 4.22 – 4.16 (m, 3H), 4.11 – 4.01 (m, 1H), 4.00 – 3.95 (m, 1H), 3.87 – 3.74 (m, 1H), 3.68 – 3.60 (m, 1H), 3.56 (p, *J* = 7.1 Hz, 1H), 2.59 (s, 6H), 2.28 (s, 3H), 1.88 – 1.80 (m, 1H), 1.70 – 1.59 (m, 3H), 1.52 (dd, *J* = 7.2, 2.3 Hz, 6H), 1.36 (s, 3H), 1.34 (s, 3H), 1.29 – 1.24 (m, 4H), 1.16 – 1.10 (m, 1H), 1.04 (q, *J* = 11.6 Hz, 1H) ppm.

**<sup>13</sup>C NMR (151 MHz, CDCl<sub>3</sub>):** δ 173.9, 164.0 (d, *J* = 257.1 Hz), 161.5, 141.6, 141.1, 138.5, 138.1, 136.8, 134.7, 133.3 (d, *J* = 8.1 Hz), 131.0, 130.6, 128.9, 128.8, 128.5, 128.4 (d, *J* = 3.4 Hz), 126.7, 123.6, 121.9, 119.7, 115.5, 115.4, 98.9, 66.5, 64.8, 61.8, 53.9, 40.9, 40.8, 38.2, 36.4, 30.1, 26.2, 21.9, 21.7, 21.1, 20.0, 19.5, 14.2 ppm.

**<sup>19</sup>F NMR (376 MHz, CDCl<sub>3</sub>):** δ -113.92 ppm.

**HRMS (ESI-TOF):** calc'd for C<sub>48</sub>H<sub>57</sub>FN<sub>3</sub>O<sub>6</sub>S [M+H]<sup>+</sup>: 822.3947, found: 822.3962.

**[α]<sub>D</sub><sup>20</sup>** = +60.9 (*c* = 1.0, CHCl<sub>3</sub>).

## Compound 52

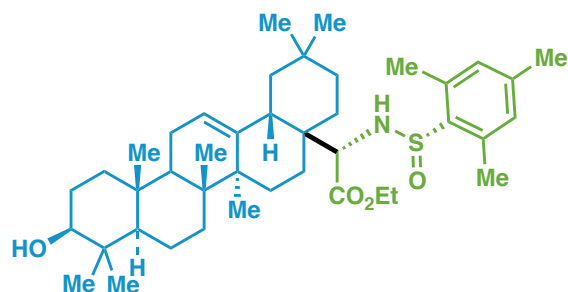

*ethyl*

**(2R)-2-((4aS,6aS,8aR,10S,12aR,14bS)-10-hydroxy-2,2,6a,9,9,12a-hexamethyl-1,3,4,5,6,6a,6b,7,8,8a,9,10,11,12,12a,12b,13,14b-octadecahydropicen-4a(2H)-yl)-2-(((S)-mesitylsulfinyl)amino)acetate (52)**

Following **General Procedure C** on 0.10 mmol scale. Purification by pTLC (2:1 hexanes:EtOAc) afforded 63.2 mg (93%, β dr >20:1) of the title compound **52**.

**Physical State:** white solid.

**m.p.:** 159 – 161 °C.

**R<sub>f</sub>** = 0.62 (2:1 hexanes:EtOAc).

**<sup>1</sup>H NMR (600 MHz, CDCl<sub>3</sub>):** δ 6.86 (s, 2H), 5.26 (t, *J* = 3.6 Hz, 1H), 5.09 (d, *J* = 9.1 Hz, 1H), 4.30 (dq, *J* = 10.8, 7.1 Hz, 1H), 4.20 (dq, *J* = 10.8, 7.1 Hz, 1H), 4.09 (d, *J* = 9.2 Hz, 1H), 3.22 (dd, *J* = 11.2, 4.6 Hz, 1H), 2.66 – 2.61 (m, 1H), 2.58 (s, 6H), 2.29 (s, 3H), 2.24 (dd, *J* = 14.0, 4.5 Hz, 1H), 2.09 (td, *J* = 14.3, 4.9 Hz, 1H), 1.97 (ddd, *J* = 18.5, 11.5, 3.2 Hz, 1H), 1.91 – 1.85 (m, 1H), 1.74 (t, *J* = 13.6 Hz, 1H), 1.66 – 1.55 (m, 6H), 1.54 – 1.44 (m, 3H), 1.39 (dt, *J* = 12.4, 2.7 Hz, 1H), 1.30 (t, *J* = 7.1 Hz, 3H), 1.27 – 1.21 (m, 1H), 1.20 (s, 3H), 1.13 (s, 3H), 1.09 (dq, *J* = 13.7, 2.1 Hz, 2H), 1.04 (dq, *J* = 15.4, 2.4 Hz, 2H), 1.01 (s, 3H), 0.97 (s, 3H), 0.91 – 0.86 (m, 1H), 0.86 – 0.82 (m, 4H), 0.81 (s, 3H), 0.76 (dd, *J* = 11.6, 1.8 Hz, 1H), 0.70 (s, 3H) ppm.

**<sup>13</sup>C NMR (151 MHz, CDCl<sub>3</sub>):** δ 172.9, 143.5, 140.9, 138.7, 136.9, 130.9, 124.0, 79.2, 61.5, 59.7, 55.4, 47.8, 46.4, 41.47, 41.45, 40.6, 40.0, 38.9, 38.8, 37.1, 33.9, 33.1, 32.4, 30.9, 28.2, 27.4, 26.8, 26.6, 25.5, 23.9, 23.7, 23.4, 21.2, 19.5, 18.5, 17.1, 15.72, 15.69, 14.3 ppm.

**HRMS (ESI-TOF):** calc'd for C<sub>42</sub>H<sub>66</sub>NO<sub>4</sub>S [M+H]<sup>+</sup>: 680.4707, found: 680.4704.

### Compound 53

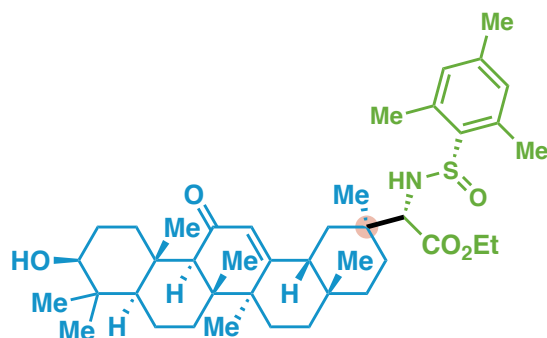

*ethyl*

**2-((2*S*,4*aS*,6*aS*,6*bR*,8*aR*,10*S*,12*aS*,12*bR*,14*bR*)-10-hydroxy-2,4*a*,6*a*,6*b*,9,9,12*a*-heptamethyl-13-oxo-1,2,3,4,4*a*,5,6,6*a*,6*b*,7,8,8*a*,9,10,11,12,12*a*,12*b*,13,14*b*-icosahydric en-2-yl)-2-(((*S*)-mesitylsulfinyl)amino)acetate (53)**

Following **General Procedure C** on 0.10 mmol scale. Purification by pTLC (2:1 hexanes:EtOAc) afforded 58.8 mg (85%, β dr 2.5:1) of the title compound **53**.

**Physical State:** white solid.



$R_f = 0.20$  (2:1 hexanes:EtOAc).

$^1\text{H NMR}$  (600 MHz,  $\text{CD}_3\text{Cl}$ ):  $\delta$  6.88 – 6.85 (m, 2H), 5.62 (s, 1H minor diastereomer), 5.54 (s, 1H major diastereomer), 5.04 – 4.95 (m, 1H), 4.28 – 4.17 (m, 2H), 3.54 (d,  $J = 10.3$  Hz, 1H), 3.26 – 3.18 (m, 1H), 2.82 – 2.74 (m, 1H), 2.63 – 2.53 (m, 6H), 2.32 – 2.26 (m, 5H), 2.13 – 2.06 (m, 1H), 2.05 – 1.92 (m, 2H), 1.89 – 1.72 (m, 1H), 1.69 – 1.66 (m, 1H), 1.64 – 1.58 (m, 3H), 1.53 – 1.32 (m, 10H), 1.28 (t,  $J = 7.2$  Hz, 3H), 1.15 – 1.09 (m, 6H), 1.04 – 0.91 (m, 9H), 0.86 – 0.75 (m, 6H), 0.72 – 0.66 (m, 1H) ppm.

$^{13}\text{C NMR}$  (151 MHz,  $\text{CDCl}_3$ ):  $\delta$  200.3, 200.0, 172.8, 172.3, 169.6, 169.1, 141.3, 141.2, 137.9, 137.9, 137.1, 136.9, 131.1, 131.0, 128.7, 128.6, 78.9, 78.9, 67.9 (2C), 61.9, 61.6, 61.5, 58.5, 55.1, 55.1, 46.8, 46.7, 45.5, 45.5, 43.5, 43.4, 40.6, 39.4, 39.3, 39.3, 39.2, 39.0, 38.6, 38.2, 37.3, 37.2, 35.6, 35.6, 32.9, 32.9, 32.5 (2C), 32.4, 31.3, 29.1, 28.7, 28.6, 28.2, 27.4 (2C), 27.1, 26.5, 26.5, 26.4, 24.3 (2C), 23.5, 23.5, 21.2, 21.2, 19.7, 19.5, 18.9, 18.8, 18.3 (2C), 17.6, 17.6, 16.5, 16.5, 15.7 (2C), 14.4, 14.3 ppm.

**HRMS (ESI-TOF):** calc'd for  $\text{C}_{42}\text{H}_{64}\text{NO}_5\text{S}$   $[\text{M}+\text{H}]^+$ : 694.4500, found: 694.4510.

### Compound 54

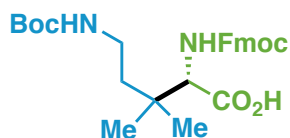

### *2-(((9H-fluoren-9-yl)methoxy)carbonyl)amino)-5-((tert-butoxycarbonyl)amino)-3,3-dimethylpentanoic acid (54)*

A culture tube was charged with **17** (0.5 mmol, 1.0 equiv). HCl (4.0 equiv) in MeOH (0.3 M) was added via syringe and the resulting mixture was stirred at rt for around 10 min (screened by TLC). After the reaction, LiOH was added until pH was 7 and the solvents were removed under reduced pressure.

LiOH (2 equiv) in MeOH/ $\text{H}_2\text{O}$  (2:1, 0.04 M) was added to the crude mixture. The reaction was stirred at 60 °C overnight. On completion, HCl in MeOH (0.3 M) was added until pH was 7 and the solvents were removed under reduced pressure.

The crude mixture was dissolved in 9% aqueous Na<sub>2</sub>CO<sub>3</sub> (5 mL) and dioxane (2 mL). It was slowly added at 0 °C to a solution of Fmoc-OSu (1.2 equiv) in dioxane (8 mL). The mixture was stirred at 0 °C for 1h and then allowed to warm to rt. After 10 h, the reaction mixture was quenched with HCl (0.5 M), reaching pH 3, and then diluted with EtOAc. The aqueous phase was extracted with EtOAc (3 x 15 mL), and the combined organic layers were washed with brine, dried over Na<sub>2</sub>SO<sub>4</sub>, filtered and the solvent removed under reduced pressure. The crude mixture was then purified by flash column chromatography (silica gel, 2:1 hexanes:EtOAc) to afford the product **54** in 68% overall yield and 95% ee.

**Physical State:** colorless oil.

*R<sub>f</sub>* = 0.08 (1:1 hexanes:EtOAc).

**<sup>1</sup>H NMR (600 MHz, CDCl<sub>3</sub>):** δ 7.76 (d, *J* = 7.5 Hz, 2H), 7.63 – 7.54 (m, 2H), 7.39 (td, *J* = 7.3, 2.6 Hz, 2H), 7.33 – 7.28 (m, 2H), 5.50 (br s, 1H), 4.68 (br s, 1H), 4.45 – 4.43 (m, 1H), 4.38 – 4.35 (m, 1H), 4.30 (d, *J* = 7.9 Hz, 1H), 4.21 (t, *J* = 6.8 Hz, 1H), 3.27 (br s, 1H), 3.16 (br s, 1H), 1.63 – 1.50 (m, 2H), 1.43 (s, 9H), 1.09 – 0.76 (m, 6H) ppm.

**<sup>13</sup>C NMR (151 MHz, CDCl<sub>3</sub>):** δ 185.8, 174.3, 156.5, 144.0, 143.9, 141.5, 127.9, 127.2, 125.24, 125.21, 120.2, 120.1, 79.8, 67.2, 60.9, 47.4, 39.2, 36.8, 29.9, 28.6, 23.9 ppm.

**HRMS (ESI-TOF):** calc'd for C<sub>27</sub>H<sub>35</sub>N<sub>2</sub>O<sub>6</sub> [M+H]<sup>+</sup>: 483.2490, found: 483.2489.

[α]<sub>D</sub><sup>20</sup> = +4.0 (*c* = 0.4, CHCl<sub>3</sub>).

The enantiopurity of **54** was determined by chiral SFC on a Daicel IBN column (3 mm, 4.6x250 mm) under isocratic conditions [15% (MeOH containing 0.5% formic acid) / CO<sub>2</sub> (4 mL/min), 1600 psi backpressure] at 30 °C. The enantiomers were detected by UV light (262 nm).

Racemic:

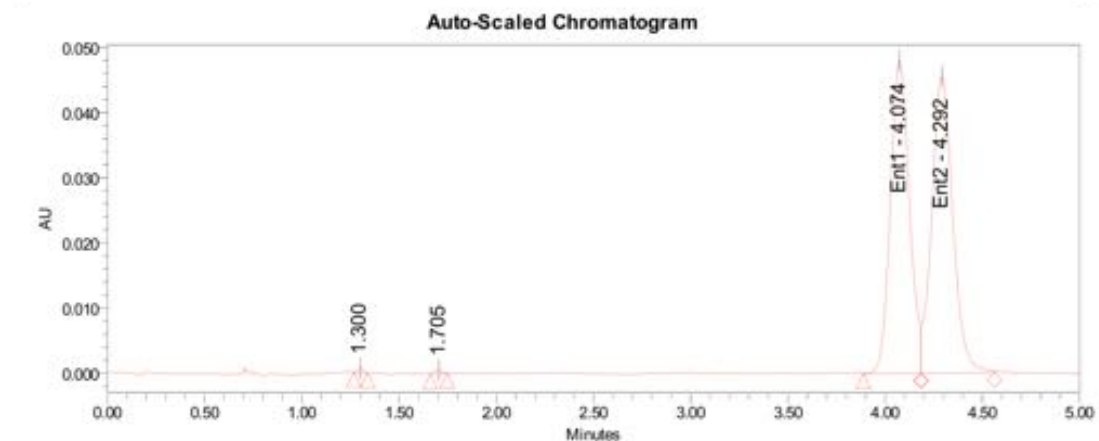

Chiral 54:

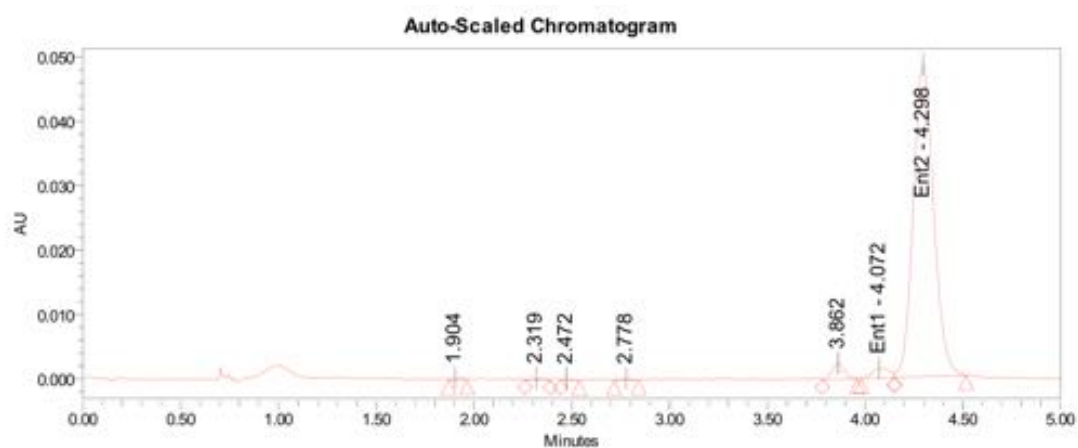

### Compound 56

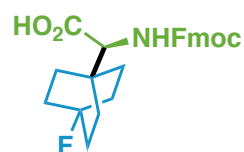

*(S)*-2-(((9*H*-fluoren-9-yl)methoxy)carbonyl)amino)-2-(4-fluorobicyclo[2.2.2]octan-1-yl)acetic acid (**56**)

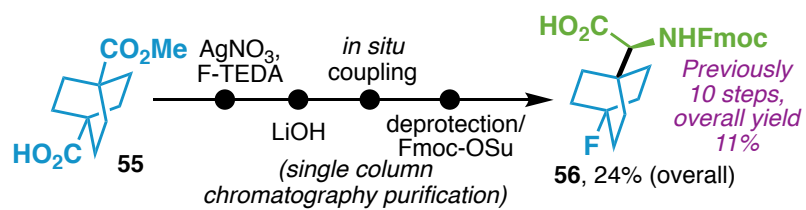

To a solution of the corresponding acid **55** (0.2 mmol, 1.0 equiv) in deoxygenated H<sub>2</sub>O (1.0 mL) was added Selectfluor<sup>®</sup> (0.36 mmol, 1.8 equiv) and AgNO<sub>3</sub> (0.04 mmol, 0.2 equiv), and the mixture was stirred at 55 °C overnight under an argon atmosphere. Then it was cooled to rt, filtered, and extracted with Et<sub>2</sub>O (5 x 5 mL). The organic layers were dried over MgSO<sub>4</sub>, filtered and solvents removed under reduced pressure to afford the crude product as a colorless oil. The crude mixture was dissolved in MeOH:H<sub>2</sub>O (2:1, 3 mL), and LiOH (0.4 mmol) was added. The reaction mixture was heated at 50 °C and stirred overnight. Afterwards, HCl in MeOH (1.0 M) was added until pH was 2 and the crude mixture was diluted with EtOAc. The aqueous phase was extracted with EtOAc (3 x 15 mL), and the combined organic layers were washed with brine, dried over Na<sub>2</sub>SO<sub>4</sub>, filtered and the solvents removed under reduced pressure to afford the crude carboxylic acid. The product was carried forward without any further purification.

**General Procedure D** was followed on 0.2 mmol scale. After 6 h, the mixture was filtered, and extracted with EtOAc (3 ×10 mL). The organic layers were dried over MgSO<sub>4</sub>, filtered and evaporated to dryness to afford the crude coupling product.

To a culture tube containing the crude mixture, HCl (4.0 equiv) in MeOH (1.0 M) was added via syringe and the resulting mixture was stirred at rt for around 10 min (screened by TLC). After the reaction, LiOH was added until pH was 7 followed by removal of solvents under reduced pressure.

LiOH (2.0 equiv) was added to the crude mixture in MeOH/H<sub>2</sub>O (2:1, 0.04 M) and the solution was stirred at 60 °C overnight. After the reaction, HCl in MeOH (0.3 M) was added until pH was 7 followed by removal of solvents under reduced pressure.

The crude mixture was dissolved in 9% aqueous Na<sub>2</sub>CO<sub>3</sub> (5 mL) and dioxane (2 mL). It was slowly added at 0 °C to a solution of Fmoc-OSu (1.2 equiv) in dioxane (8 mL). The mixture was stirred at 0 °C for 1h and then allowed to warm to rt. After 10 h, the reaction was quenched with HCl (1.0 M), reaching pH 3, and then diluted with EtOAc. The mixture was extracted with EtOAc (3 x 15 mL), and the combined organic layers

were washed with brine, dried over Na<sub>2</sub>SO<sub>4</sub>, filtered and the solvents removed under reduced pressure. The crude mixture was then purified by pTLC (10:1 CH<sub>2</sub>Cl<sub>2</sub>:MeOH) to afford product **56** in 20.4 mg (24%) overall yield.

**Physical State:** colorless oil.

**R<sub>f</sub>** = 0.10 (1:1 hexanes:EtOAc).

**<sup>1</sup>H NMR (400 MHz, CDCl<sub>3</sub>):** δ 7.77 (d, *J* = 7.5 Hz, 2H), 7.58 (d, *J* = 7.5 Hz, 2H), 7.40 (t, *J* = 7.7 Hz, 2H), 7.36 – 7.27 (m, 2H), 5.22 (d, *J* = 9.7 Hz, 1H), 4.52 – 4.47 (m, 1H), 4.42 – 4.38 (m, 1H), 4.20 (t, *J* = 6.6 Hz, 2H), 4.15 (d, *J* = 9.6 Hz, 1H), 1.80 – 1.70 (m, 11H), 1.45 (br s, 1H) ppm.

**<sup>13</sup>C NMR (151 MHz, CDCl<sub>3</sub>):** δ 185.8, 175.2, 156.2, 143.9, 143.7, 141.53, 141.50, 127.93, 127.90, 127.2, 125.2, 125.1, 120.20, 120.15, 93.6 (d, *J* = 186.3 Hz), 67.2, 60.1, 47.4, 34.7, 30.8 (d, *J* = 19.3 Hz), 28.9 (d, *J* = 10.3 Hz) ppm.

**<sup>19</sup>F NMR (376 MHz, CDCl<sub>3</sub>):** δ -152.53 (s) ppm.

**HRMS (ESI-TOF):** calc'd for C<sub>25</sub>H<sub>27</sub>FNO<sub>4</sub> [M+H]<sup>+</sup>: 424.1924, found: 424.1916.

**[α]<sub>D</sub><sup>20</sup>** = +15.0 (*c* = 0.5, CHCl<sub>3</sub>).

For previous AA synthesis, see ref 17.

## Compound 58

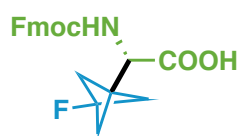

**2-(((9H-fluoren-9-yl)methoxy)carbonyl)amino)-2-(3-fluorobicyclo[1.1.1]pentan-1-yl)acetic acid (58)**

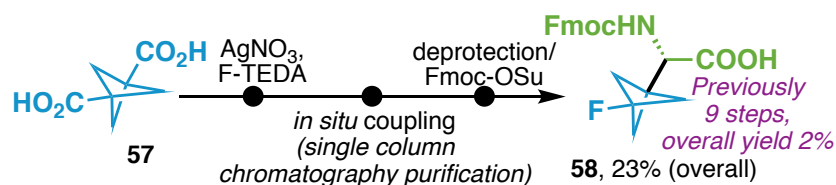

To a solution of **57** (0.2 mmol, 1.0 equiv) in deoxygenated H<sub>2</sub>O (1.0 mL) was added Selectfluor<sup>®</sup> (0.36 mmol, 1.8 equiv) and AgNO<sub>3</sub> (0.04 mmol, 0.2 equiv), and the

mixture was stirred at 55 °C overnight under an argon atmosphere. Then it was cooled to rt, filtered, and extracted with Et<sub>2</sub>O (5 x 5 mL). The organic layers were dried over MgSO<sub>4</sub>, filtered and evaporated to dryness to afford the corresponding acid as a white solid.

**General Procedure D** was followed on 0.20 mmol scale. After 6 h, the mixture was filtered and extracted with EtOAc (3 x 10 mL). The organic layers were dried over MgSO<sub>4</sub>, filtered and evaporated to dryness to afford the crude coupling product.

To a culture tube containing the crude mixture, HCl (4.0 equiv) in MeOH (1.0 M) was added via syringe and the resulting mixture was stirred at rt for around 10 min (monitored by TLC). After the reaction, LiOH was added until pH was 7 followed by removal of solvents under reduced pressure.

LiOH (2.0 equiv) was added to the crude mixture in MeOH/H<sub>2</sub>O (2:1, 0.04 M). The reaction was stirred at 60 °C overnight. After the reaction, HCl in MeOH (0.3 M) was added until pH was 7. Then, the solvent was removed under reduced pressure.

The crude mixture was dissolved in 9% aqueous Na<sub>2</sub>CO<sub>3</sub> (5 mL) and dioxane (2 mL). It was slowly added at 0 °C to a solution of Fmoc-OSu (1.2 equiv) in dioxane (8 mL). The mixture was stirred at 0 °C for 1h and then allowed to warm to rt. After 10 h, the reaction was quenched with HCl (1.0 M), reaching pH 3, and then diluted with EtOAc. The aqueous phase was extracted with EtOAc (3 x 15 mL), and the combined organic layers were washed with brine, dried over Na<sub>2</sub>SO<sub>4</sub>, filtered and the solvent was removed under reduced pressure. The crude mixture was then purified by pTLC (10:1 CH<sub>2</sub>Cl<sub>2</sub>:MeOH) to afford product **58** in 17.5 mg (23%) overall yield.

**Physical State:** colorless oil.

**R<sub>f</sub>** = 0.10 (1:1 hexanes:EtOAc).

**<sup>1</sup>H NMR (600 MHz, CDCl<sub>3</sub>):** δ 7.77 (dd, *J* = 7.6, 2.8 Hz, 2H), 7.57 (d, *J* = 7.5 Hz, 2H), 7.40 (td, *J* = 7.5, 3.9 Hz, 2H), 7.34 – 7.28 (m, 2H), 5.33 (d, *J* = 8.5 Hz, 1H), 4.69 (d, *J* = 8.0 Hz, 1H), 4.54 – 4.44 (m, 1H), 4.43 – 4.37 (m, 1H), 4.24 – 4.15 (m, 1H), 2.09 – 2.01 (m, 6H) ppm.

**<sup>13</sup>C NMR (151 MHz, CDCl<sub>3</sub>):** δ 174.0, 173.2, 156.7, 155.9, 143.8, 143.7, 143.6, 143.4, 141.6, 141.5, 128.1 (2C), 128.0 (2C), 127.4 (2C), 127.3 (2C), 125.11 (2C), 125.07 (2C), 124.7, 124.6, 120.2 (2C), 120.2 (2C), 75.2 (d, *J* = 327.6 Hz, 2C), 67.6, 67.3, 55.7 (d, *J* = 22.1 Hz, 2C), 53.1 (d, *J* = 21.2 Hz), 52.4 (d, *J* = 26.0 Hz), 47.3, 47.1, 29.6 (d, *J* = 46.9 Hz, 2C) ppm (2 rotamers reported).

**<sup>19</sup>F NMR (376 MHz, CDCl<sub>3</sub>):** δ -149.98 (s) ppm.

**HRMS (ESI-TOF):** calc'd for C<sub>22</sub>H<sub>21</sub>FNO<sub>4</sub> [M+H]<sup>+</sup>: 382.1455, found: 382.1451.

[α]<sub>D</sub><sup>20</sup> = +16.0 (*c* = 0.5, CHCl<sub>3</sub>).

For previous AA synthesis, see ref 18.

### Compound 59

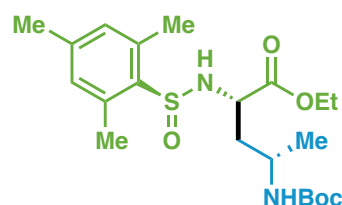

*ethyl (4S)-4-((tert-butoxycarbonyl)amino)-2-(((S)-mesitylsulfinyl)amino)pentanoate*  
(59)

Following **General Procedure C** on 0.10 mmol scale. Purification by pTLC (2:1 hexanes:EtOAc) afforded 20.9 mg (49%) of the title compound **59**.

**Physical State:** colorless oil.

**R<sub>f</sub>** = 0.20 (2:1 hexanes:EtOAc).

**<sup>1</sup>H NMR (500 MHz, CDCl<sub>3</sub>):** δ 6.86 (s, 2H), 5.21 (d, *J* = 8.6 Hz, 1H), 4.53 (d, *J* = 8.9 Hz, 1H), 4.23 (qq, *J* = 7.0, 3.5 Hz, 2H), 4.04 (td, *J* = 10.0, 3.6 Hz, 1H), 3.94 (br s, 1H), 2.62 (s, 6H), 2.27 (s, 3H), 1.86 – 1.78 (m, 1H), 1.77 – 1.68 (m, 1H), 1.43 (s, 9H), 1.30 (t, *J* = 7.2 Hz, 3H), 1.17 (d, *J* = 6.6 Hz, 3H) ppm.

**<sup>13</sup>C NMR (126 MHz, CDCl<sub>3</sub>):** δ 173.6, 155.3, 141.1, 138.0, 137.0, 130.9, 79.4, 61.9, 55.4, 43.6, 41.0, 28.5, 21.7, 21.1, 19.4, 14.2 ppm.

**HRMS (ESI-TOF):** calc'd for C<sub>21</sub>H<sub>35</sub>N<sub>2</sub>O<sub>5</sub>S [M+H]<sup>+</sup>: 427.2261, found: 427.2261.

[α]<sub>D</sub><sup>20</sup> = +27.3 (*c* = 1.0, CH<sub>2</sub>Cl<sub>2</sub>).

### Compound 60

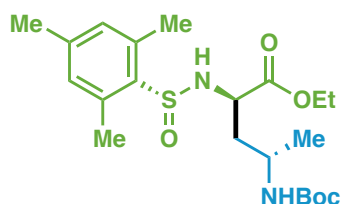

*ethyl*

*(2R,4S)-4-((tert-butoxycarbonyl)amino)-2-(((R)-mesitylsulfinyl)amino)pentanoate*

*(60)*

Following **General Procedure C** on 0.10 mmol scale. Purification by pTLC (2:1 hexanes:EtOAc) afforded 23.4 mg (55%) of the title compound **60**.

**Physical State:** colorless oil.

$R_f = 0.20$  (2:1 hexanes:EtOAc).

$^1\text{H NMR}$  (500 MHz,  $\text{CDCl}_3$ ):  $\delta$  6.84 (s, 2H), 5.27 (d,  $J = 6.7$  Hz, 1H), 4.39 (s, 1H), 4.28 – 4.13 (m, 2H), 4.02 (ddd,  $J = 9.0, 7.5, 5.3$  Hz, 1H), 3.84 (s, 1H), 2.58 (s, 6H), 2.27 (s, 3H), 1.99 – 1.90 (m, 1H), 1.87 – 1.80 (m, 1H), 1.40 (s, 9H), 1.28 (t,  $J = 7.1$  Hz, 3H), 1.18 (d,  $J = 6.6$  Hz, 3H) ppm.

$^{13}\text{C NMR}$  (151 MHz,  $\text{CDCl}_3$ ):  $\delta$  173.1, 155.1, 141.1, 137.7, 136.9, 131.0, 79.5, 61.9, 55.2, 43.5, 40.5, 28.5, 21.1, 20.9, 19.5, 14.2 ppm.

**HRMS (ESI-TOF):** calc'd for  $\text{C}_{21}\text{H}_{35}\text{N}_2\text{O}_5\text{S}$   $[\text{M}+\text{H}]^+$ : 427.2261, found: 427.2261.

$[\alpha]_D^{20} = -127.1$  ( $c = 1.0$ ,  $\text{CHCl}_3$ ).

### Compound 61

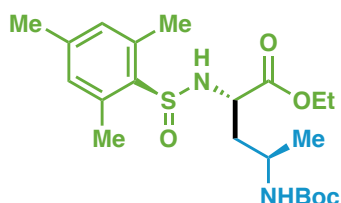

*ethyl (4R)-4-((tert-butoxycarbonyl)amino)-2-(((S)-mesitylsulfinyl)amino)pentanoate*

*(61)*

For 0.1 mmol scale preparation, **General Procedure C** was followed. Purification by



pTLC (silica gel, 2:1 hexanes:EtOAc) afforded 22.6 mg (53%) of the title compound **61**.

For 1.0 mmol scale preparation, **General Procedure C** was followed. Purification by column chromatography (silica gel, 4:1 hexanes:EtOAc) afforded 242.4 mg (56%) of the title compound **61**.

**Physical State:** colorless oil.

$R_f = 0.22$  (2:1 hexanes:EtOAc).

$^1\text{H NMR}$  (500 MHz,  $\text{CDCl}_3$ ):  $\delta$  6.86 (s, 2H), 5.20 (d,  $J = 9.6$  Hz, 1H), 4.52 (d,  $J = 7.5$  Hz, 1H), 4.23 (qd,  $J = 7.1, 2.4$  Hz, 2H), 4.04 (td,  $J = 10.1, 3.7$  Hz, 1H), 3.94 (br s, 1H), 2.62 (s, 6H), 2.28 (s, 3H), 1.86 – 1.78 (m, 1H), 1.77 – 1.68 (m, 1H), 1.43 (s, 9H), 1.30 (t,  $J = 7.2$  Hz, 3H), 1.17 (d,  $J = 6.6$  Hz, 3H) ppm.

$^{13}\text{C NMR}$  (101 MHz,  $\text{CDCl}_3$ ):  $\delta$  173.5, 155.3, 140.9, 137.9, 136.9, 130.8, 79.2, 61.8, 55.3, 43.4, 40.8, 28.3, 21.6, 21.0, 19.3, 14.1 ppm.

**HRMS (ESI-TOF):** calc'd for  $\text{C}_{21}\text{H}_{35}\text{N}_2\text{O}_5\text{S}$   $[\text{M}+\text{H}]^+$ : 427.2261, found: 427.2265.

$[\alpha]_{\text{D}}^{20} = +20.5$  ( $c = 1.0$ ,  $\text{CH}_2\text{Cl}_2$ ).

### Compound 62

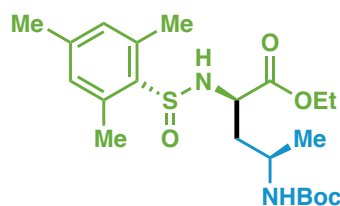

*ethyl*

*(2R,4R)-4-((tert-butoxycarbonyl)amino)-2-(((R)-mesitylsulfinyl)amino)pentanoate*  
**(62)**

Following **General Procedure C** on 0.10 mmol scale. Purification by pTLC (2:1 hexanes:EtOAc) afforded 25.6 mg (60%) of the title compound **62**.

**Physical State:** colorless oil.

$R_f = 0.20$  (2:1 hexanes:EtOAc).

**<sup>1</sup>H NMR (500 MHz, CDCl<sub>3</sub>):** δ 6.86 (s, 2H), 5.20 (d, *J* = 9.5 Hz, 1H), 4.53 (d, *J* = 9.0 Hz, 1H), 4.22 (q, *J* = 7.2, 2.6 Hz, 2H), 4.03 (td, *J* = 9.9, 3.7 Hz, 1H), 3.93 (s, 1H), 2.62 (s, 6H), 2.27 (s, 3H), 1.87 – 1.78 (m, 1H), 1.76 – 1.66 (m, 1H), 1.42 (s, 9H), 1.29 (t, *J* = 7.1 Hz, 3H), 1.16 (d, *J* = 6.7 Hz, 3H) ppm.

**<sup>13</sup>C NMR (101 MHz, CDCl<sub>3</sub>):** δ 173.6, 155.3, 141.1, 138.1, 137.0, 130.9, 79.4, 62.0, 55.4, 43.6, 41.0, 28.5, 21.8, 21.2, 19.4, 14.2 ppm.

**HRMS (ESI-TOF):** calc'd for C<sub>21</sub>H<sub>35</sub>N<sub>2</sub>O<sub>5</sub>S [M+H]<sup>+</sup>: 427.2261, found: 427.2265.

[α]<sub>D</sub><sup>20</sup> = -151.6 (*c* = 1.0, CHCl<sub>3</sub>).

### Compound 63

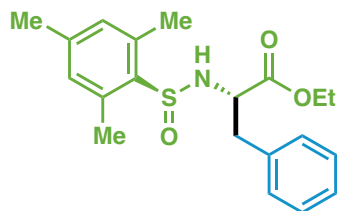

### *ethyl ((S)-mesitylsulfinyl)phenylalaninate (63)*

Following **General Procedure E** on 0.10 mmol scale. Purification by pTLC (3:1 hexanes:EtOAc) afforded 18.3 mg (51%) of the title compound **63**.

**Physical State:** colorless oil.

**R<sub>f</sub>** = 0.65 (2:1 hexanes:EtOAc).

**<sup>1</sup>H NMR (400 MHz, CDCl<sub>3</sub>):** δ 7.31 – 7.20 (m, 3H), 7.19 – 7.13 (m, 2H), 6.82 (s, 2H), 5.08 (d, *J* = 8.7 Hz, 1H), 4.29 – 4.10 (m, 3H), 3.15 (dd, *J* = 13.8, 5.2 Hz, 1H), 2.89 (dd, *J* = 13.8, 8.5 Hz, 1H), 2.41 (s, 6H), 2.27 (s, 3H), 1.24 (t, *J* = 7.1 Hz, 3H) ppm.

**<sup>13</sup>C NMR (101 MHz, CDCl<sub>3</sub>):** δ 172.9, 141.0, 137.8, 136.9, 136.6, 130.9, 129.6, 128.5, 127.0, 61.9, 58.8, 40.6, 21.2, 19.2, 14.2 ppm.

**HRMS (ESI-TOF):** calc'd for C<sub>20</sub>H<sub>26</sub>NO<sub>3</sub>S [M+H]<sup>+</sup>: 360.1628, found: 360.1633.

[α]<sub>D</sub><sup>20</sup> = +103.9 (*c* = 1.0, CHCl<sub>3</sub>).

### Compound 63-a

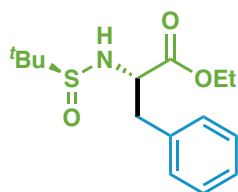

#### *ethyl ((S)-tert-butylsulfinyl)phenylalaninate (63-a).*

Following **General Procedure E** on 0.10 mmol scale. Purification by pTLC (3:1 hexanes:EtOAc) afforded 15.4 mg (52%) of the title compound **63-a**.

**Physical State:** yellow oil.

$R_f$  = 0.68 (2:1 hexanes:EtOAc).

$^1\text{H NMR}$  (600 MHz,  $\text{CDCl}_3$ ):  $\delta$  7.39 – 7.29 (m, 5H), 4.47 (d,  $J$  = 10.1 Hz, 1H), 4.24 – 4.10 (m, 2H), 4.01 – 3.92 (m, 2H), 3.65 (d,  $J$  = 10.1 Hz, 1H), 1.28 (t,  $J$  = 7.1 Hz, 3H), 0.98 (s, 9H) ppm.

$^{13}\text{C NMR}$  (151 MHz,  $\text{CDCl}_3$ ):  $\delta$  172.6, 130.5, 129.8, 128.9, 128.4, 63.3, 61.9, 61.3, 34.4, 26.8, 14.3 ppm.

**HRMS (ESI-TOF):** calc'd for  $\text{C}_{15}\text{H}_{24}\text{NO}_3\text{S}$   $[\text{M}+\text{H}]^+$ : 298.1477, found: 298.1480.

$[\alpha]_D^{20}$  = +102.2 ( $c$  = 1.0,  $\text{CHCl}_3$ ).

### Compound 64

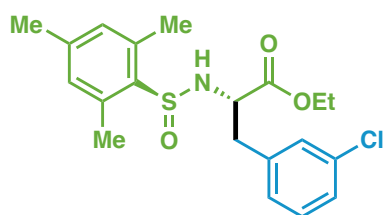

#### *ethyl 3-(3-chlorophenyl)-2-(((S)-mesitylsulfinyl)amino)propanoate (64)*

Following **General Procedure E** on 0.10 mmol scale. Purification by pTLC (3:1 hexanes:EtOAc) afforded 25.6 mg (65%) of the title compound **64**.

**Physical State:** colorless oil.

$R_f$  = 0.62 (2:1 hexanes:EtOAc).

**<sup>1</sup>H NMR (600 MHz, CDCl<sub>3</sub>):** δ 7.23 – 6.90 (m, 4H), 6.83 (s, 2H), 5.11 (d, *J* = 8.5 Hz, 1H), 4.25 – 4.14 (m, 3H), 3.13 (dd, *J* = 13.9, 5.0 Hz, 1H), 2.85 (dd, *J* = 13.9, 8.7 Hz, 1H), 2.43 (s, 6H), 2.27 (s, 3H), 1.26 (t, *J* = 7.1 Hz, 3H) ppm.

**<sup>13</sup>C NMR (151 MHz, CDCl<sub>3</sub>):** δ 172.6, 141.1, 138.8, 137.7, 136.9, 134.3, 130.9, 129.81, 129.78, 127.7, 127.2, 62.1, 58.5, 40.0, 21.1, 19.2, 14.2 ppm.

**HRMS (ESI-TOF):** calc'd for C<sub>20</sub>H<sub>24</sub>ClNNaO<sub>3</sub>S [M+Na]<sup>+</sup>: 416.1063, found: 416.1057.

### Compound 65

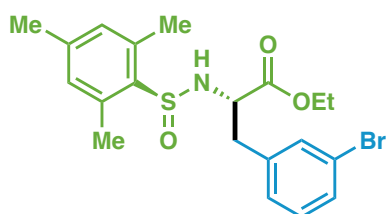

### *ethyl 3-(3-bromophenyl)-2-(((S)-mesitylsulfinyl)amino)propanoate (65)*

Following **General Procedure E** on 0.10 mmol scale. Purification by pTLC (3:1 hexanes:EtOAc) afforded 18.4 mg (42%) of the title compound **65**.

**Physical State:** colorless oil.

**R<sub>f</sub>** = 0.62 (2:1 hexanes:EtOAc).

**<sup>1</sup>H NMR (400 MHz, CDCl<sub>3</sub>):** δ 7.42 – 7.28 (m, 2H), 7.20 – 7.03 (m, 2H), 6.83 (s, 2H), 5.10 (d, *J* = 8.5 Hz, 1H), 4.29 – 4.12 (m, 3H), 3.12 (dd, *J* = 13.8, 5.0 Hz, 1H), 2.84 (dd, *J* = 13.8, 8.7 Hz, 1H), 2.43 (s, 6H), 2.27 (s, 3H), 1.26 (t, *J* = 7.2 Hz, 3H) ppm.

**<sup>13</sup>C NMR (151 MHz, CDCl<sub>3</sub>):** δ 172.6, 141.1, 139.1, 137.7, 136.9, 132.7, 130.9, 130.11, 130.06, 128.2, 122.5, 62.1, 58.5, 40.0, 21.1, 19.2, 14.2 ppm.

**HRMS (ESI-TOF):** calc'd for C<sub>20</sub>H<sub>24</sub>BrNNaO<sub>3</sub>S [M+Na]<sup>+</sup>: 460.0558, found: 460.0553.

## Compound 66

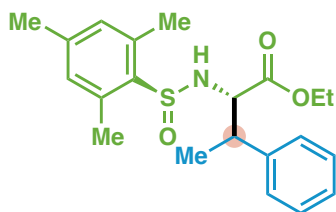

### *ethyl (3R)-2-(((S)-mesitylsulfinyl)amino)-3-phenylbutanoate (66)*

Following **General Procedure E** on 0.10 mmol scale. Purification by pTLC (3:1 hexanes:EtOAc) afforded 13.5 mg (36%, dr 1:1:0.1:0.1) of the title compound **66**.

**Physical State:** colorless oil.

$R_f$  = 0.58 (3:1 hexanes:EtOAc).

$^1\text{H NMR}$  (400 MHz,  $\text{CDCl}_3$ ):  $\delta$  7.30 – 7.16 (m, 7H), 7.11 – 7.08 (m, 2H), 7.01 – 6.94 (m, 1H), 6.87 – 6.75 (m, 4H), 5.13 (d,  $J$  = 9.3 Hz, 1H), 4.90 (d,  $J$  = 9.2 Hz, 1H), 4.25 – 3.93 (m, 6H), 3.31 – 3.00 (m, 2H), 2.52 – 2.18 (m, 18H), 1.47 – 1.00 (m, 12H) ppm (2 major diastereomers reported).

$^{13}\text{C NMR}$  (151 MHz,  $\text{CDCl}_3$ ): 172.9, 172.6, 142.0, 141.6, 141.0, 140.9, 138.2, 138.0, 137.6, 137.4, 136.9, 130.9, 130.8, 128.5, 128.0, 128.0, 127.1, 127.1, 63.7, 63.1, 61.8, 61.7, 43.5, 43.3, 21.2, 21.2, 19.3, 19.3, 18.5, 15.8, 14.2, 14.0 ppm (2 major diastereomers reported).

**HRMS (ESI-TOF):** calc'd for  $\text{C}_{21}\text{H}_{28}\text{NO}_3\text{S}$   $[\text{M}+\text{H}]^+$ : 374.1784, found: 374.1790.

## Library Synthesis Procedure

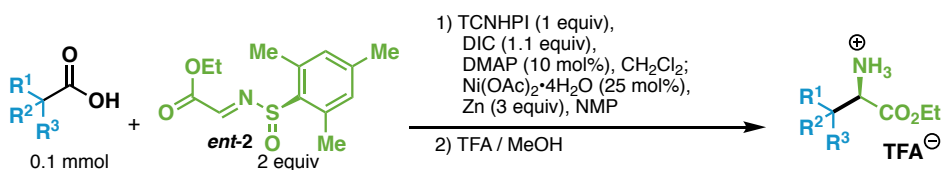

### Step 1: Carboxylic acid activation / decarboxylative addition to imine.

Stock solution A: To a dried round bottom flask under nitrogen atmosphere was added TCNHPI (1 equiv. per reaction, 30 mg, 0.10 mmol) and DMAP (10 mol% per reaction, 1.2 mg, 0.010 mmol). The flask was purged with nitrogen for 5 min, then  $\text{CH}_2\text{Cl}_2$  (0.5 mL per reaction) was added. The resulting mixture was sonicated for 1 min, then stirred rapidly for 10 min to provide an orange suspension (TCNHPI not fully soluble).

Stock solution B: To a dry round bottom flask under nitrogen atmosphere was added imino-ester *ent-2* (2 equiv per reaction, 54 mg, 0.20 mmol) and  $\text{Ni}(\text{OAc})_2 \cdot 4\text{H}_2\text{O}$  (0.25 equiv per reaction, 6.2 mg, 0.025 mmol). The flask was purged with nitrogen for 5 min, then NMP (anhydrous) was added (0.5 mL per reaction). The resulting mixture was stirred vigorously to provide a transparent green solution.

Stock solution A was prepared according to the procedure above. A plate of 1-dram vials with septum caps under air atmosphere were each charged with carboxylic acid monomer and stirbar. Using an 18-gauge needle to prevent clogging, stock solution A was added (0.5 mL per vial). Some undissolved TCNHPI was observed remaining in the round bottom flask of stock solution A (not rinsed). The vials were stirred at 23 °C for 5 min, then DIC (1.1 equiv per reaction, 17  $\mu\text{L}$ , 0.11 mmol) was added via syringe. The resulting mixture was stirred at ambient temperature for 3 h, then each vial was concentrated in parallel under a stream of nitrogen. During this time, stock solution B was prepared. Approximately 20 mg of zinc dust (0.3 mmol) was added to each vial (not individually measured; one spatula tip ~20 mg). Using one vacuum line fitted with a 20-gauge needle and one nitrogen line fitted with a 20-gauge needle, each vial was evacuated for ~15 seconds, then backfilled with nitrogen (repeated the purging/backfill sequence once). Stock solution B (0.5 mL per reaction) was added to

each vial and the reactions were stirred at ambient temperature, producing typically green or brown suspensions. After 20 h, the reactions were diluted with 2 mL EtOAc and 2 mL brine. The capped vials were vortexed for ~10 seconds each. The organic phase was removed by pipette and filtered through a prepacked Na<sub>2</sub>SO<sub>4</sub> plug into a 1-dram vial. The Na<sub>2</sub>SO<sub>4</sub> plugs were rinsed with EtOAc (~2 mL) and the resulting solutions were concentrated in parallel under a stream of nitrogen to provide the crude sulfinamide products.

Step 2: Sulfinamide removal.

To the 1-dram vials containing the sulfinamide intermediates was added stir bars and MeOH (1 mL per vial). TFA was added (8 equiv, 61  $\mu$ L, 0.80 mmol) and the reactions were stirred at 23 °C for 1 h. The reactions were concentrated in parallel under a stream of nitrogen. The resulting crude amino esters were dissolved in 1 mL DMSO and submitted for high-throughput purification (column: Waters Sunfire C18 19x100, 5 $\mu$ ; Mobile phase A: 0.05% TFA in water (v/v); Mobile phase B: 0.05% TFA in acetonitrile (v/v)).

**The isolated, desired AA products were characterized using LC-MS, which is consistent with other reported library synthesis standard. For a library synthesis data characterization example, see ref 19.**

## Amino Ester Data from Library Synthesis

### Compound 68b

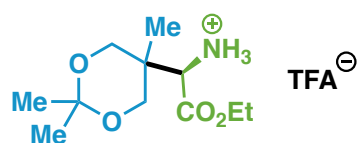

### *(R)*-2-ethoxy-2-oxo-1-(2,2,5-trimethyl-1,3-dioxan-5-yl)ethan-1-aminium (68b)

\*acetone partially deprotected in the presence of TFA.

Product obtained as an off-white solid (3.2 mg). LC-MS data – Ret. time 1.16: MS ES+  $m/z$  232 ( $[M+H]^+$ ).

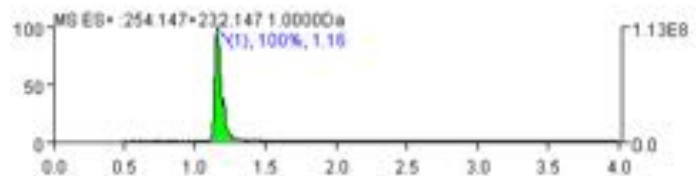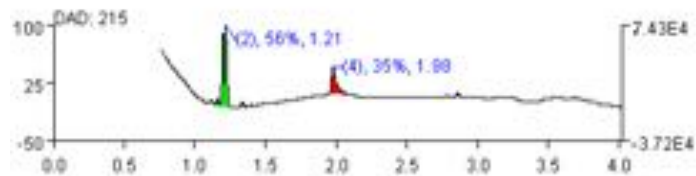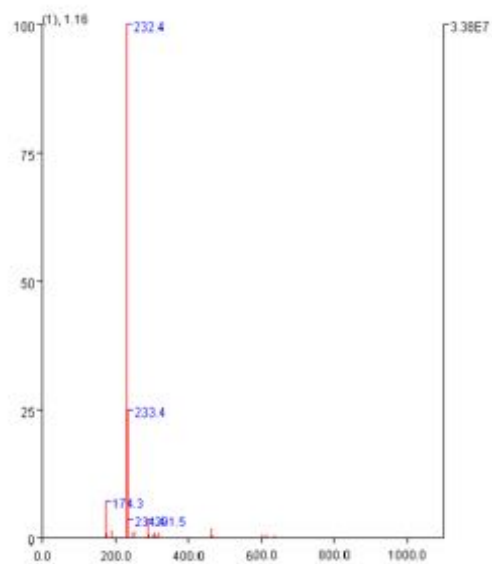



## Compound 69b

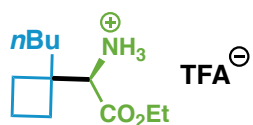

### *(R)*-1-(1-butylcyclobutyl)-2-ethoxy-2-oxoethan-1-aminium (69b)

Product obtained as a white solid (3.1 mg). LC-MS data – Ret. time 1.85: MS ES+  $m/z$  214 ([M+H]<sup>+</sup>).

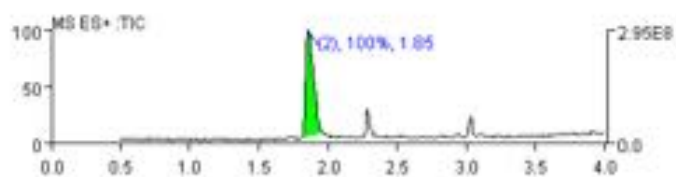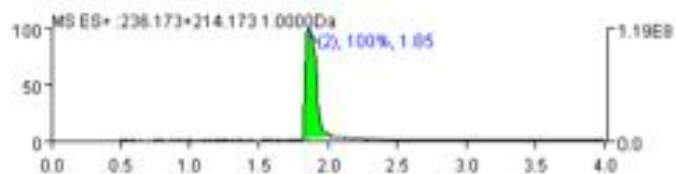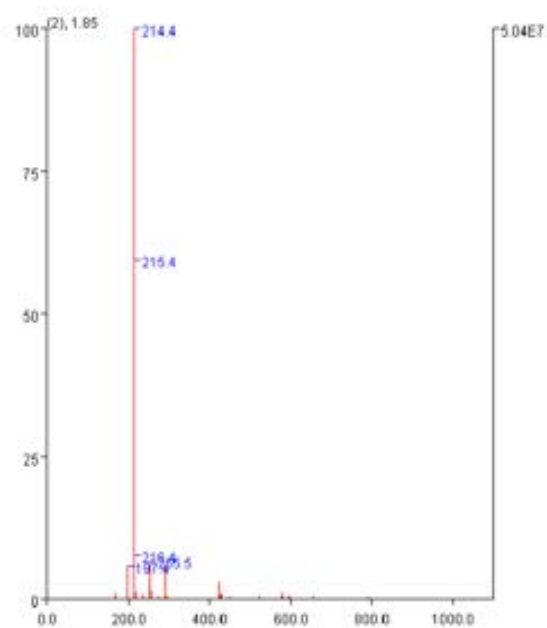

## Compound 70b

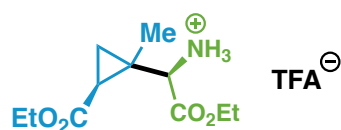

***(R)*-2-ethoxy-1-((1*R*,2*S*)-2-(ethoxycarbonyl)-1-methylcyclopropyl)-2-oxoethan-1-aminium (70b)**

Product obtained as an off-white solid (1.8 mg),  $\beta$  stereochemistry unassigned.

LC-MS data – Ret. time 1.33: MS ES+  $m/z$  230 ( $[M+H]^+$ ).

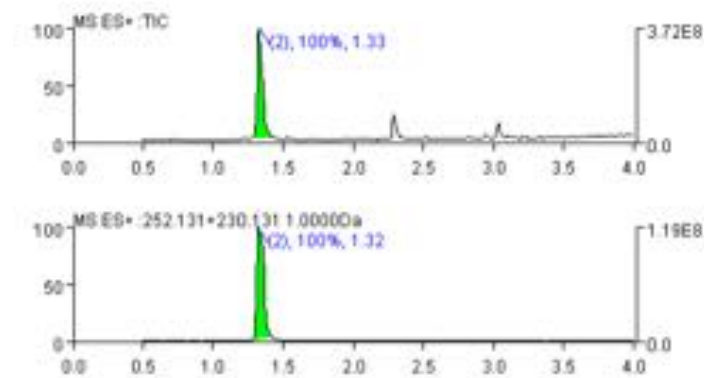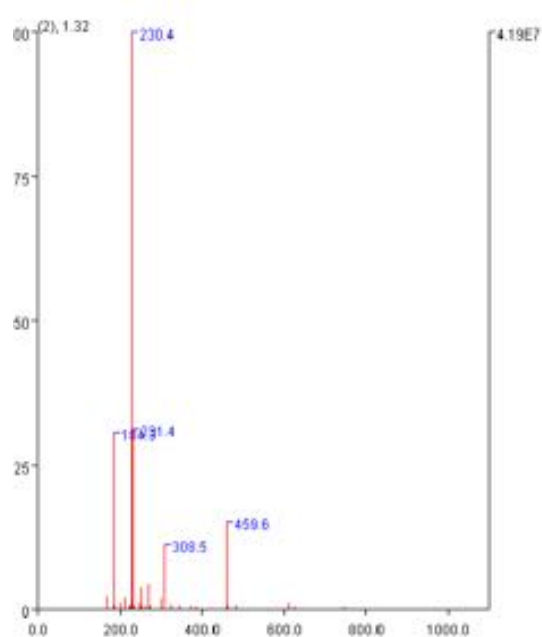

**Compound 71b**

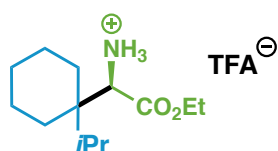

***(R)*-2-ethoxy-1-(1-isopropylcyclohexyl)-2-oxoethan-1-aminium (71b)**

Product obtained as an off-white solid (2.1 mg). LC-MS data – Ret. time 1.88: MS

ES+  $m/z$  228 ( $[M+H]^+$ ).

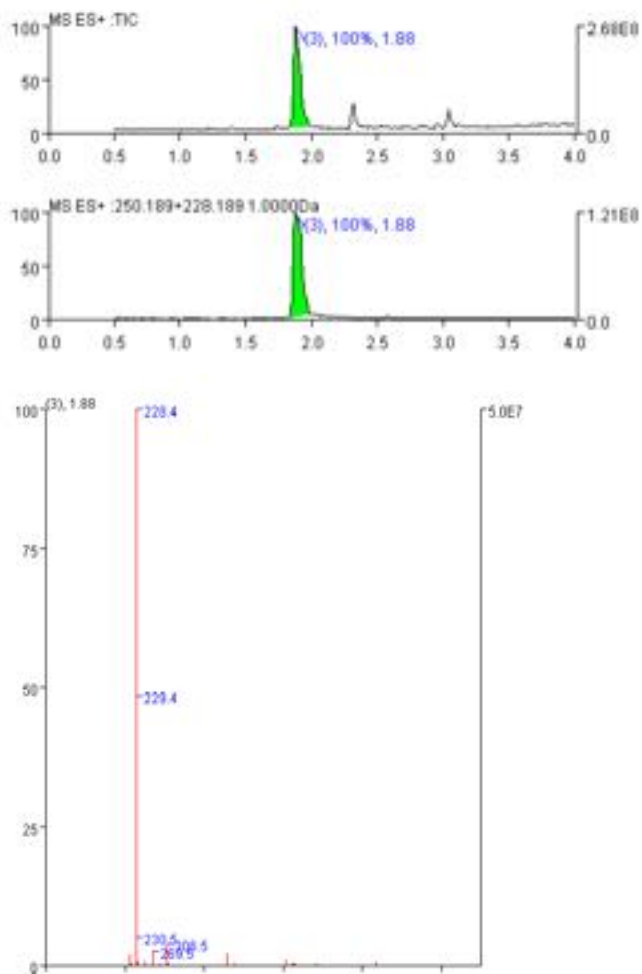

### Compound 72b

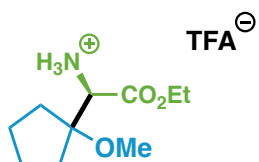

### *(R)*-2-ethoxy-1-(1-methoxycyclopentyl)-2-oxoethan-1-aminium (72b)

Product obtained as an off-white solid (1.6 mg). LC-MS data – Ret. time 1.26: MS ES+  $m/z$  202 ( $[\text{M}+\text{H}]^+$ ).

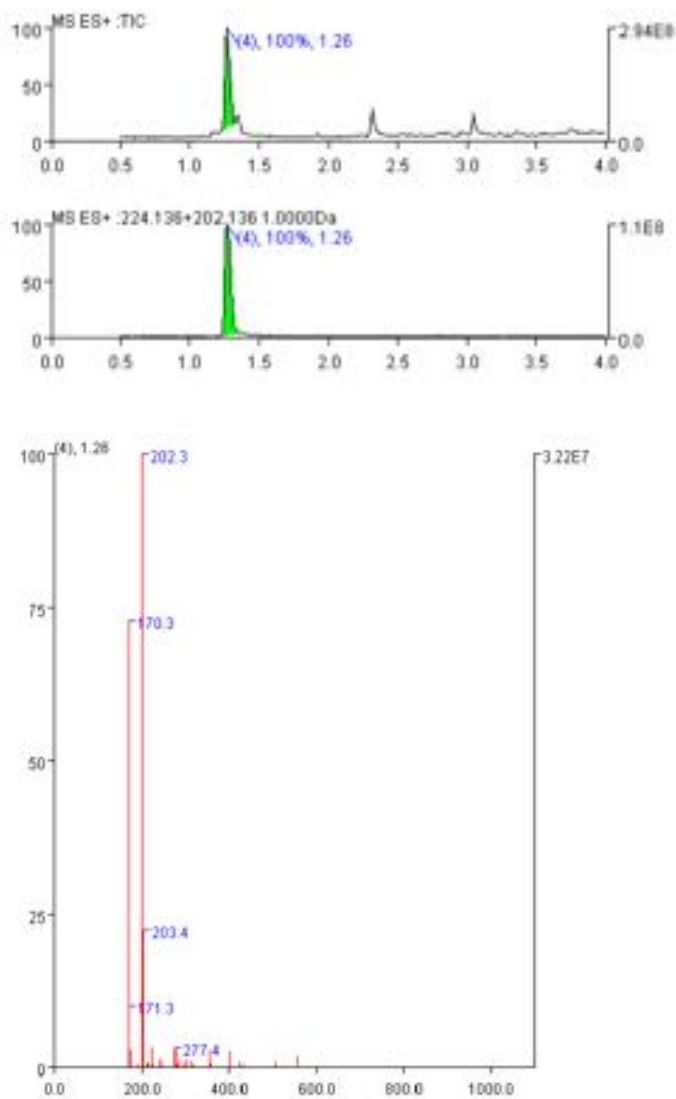

### Compound 74b

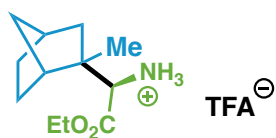

*(R)*-2-ethoxy-1-((1*R*,2*R*,4*S*)-2-methylbicyclo[2.2.1]heptan-2-yl)-2-oxoethan-1-aminium (74b)

Product obtained as an off-white solid (2.2 mg),  $\beta$  stereochemistry unassigned.

LC-MS data – Ret. time 1.36: MS ES+  $m/z$  212 ( $[M+H]^+$ ).

1: MS ES+ :235+213 1.0000Da

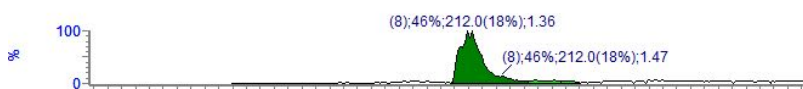

7:(Time: 1.36) Combine (151:170-(147:150+171:173))

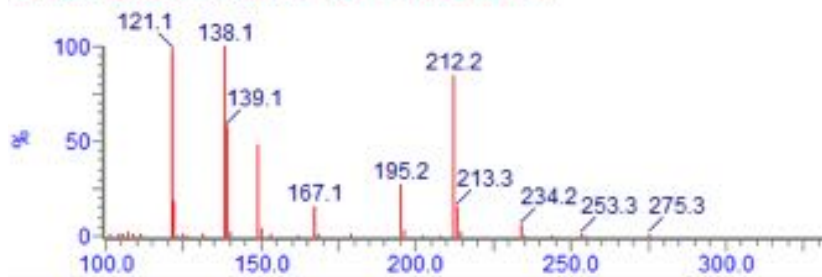

### Compound 75b

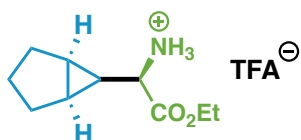

*(R)*-1-((1*R*,5*S*,6*s*)-bicyclo[3.1.0]hexan-6-yl)-2-ethoxy-2-oxoethan-1-aminium (75b)

Product obtained as an off-white solid (1.0 mg),  $\beta$  stereochemistry unassigned.

LC-MS data – Ret. time 1.39: MS ES+  $m/z$  184 ( $[M+H]^+$ ).

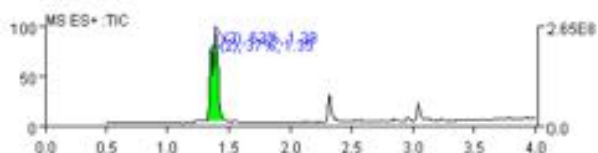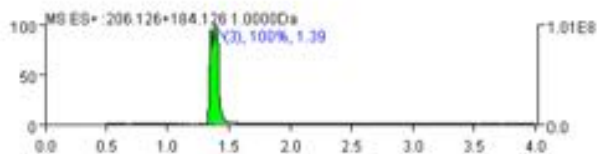

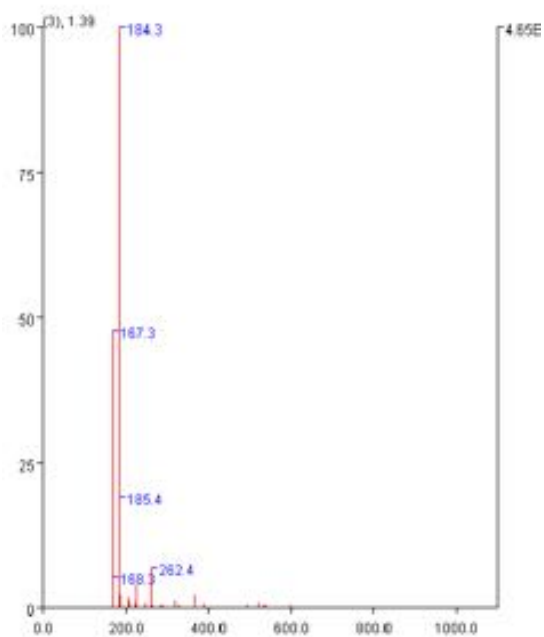

### Compound 76b

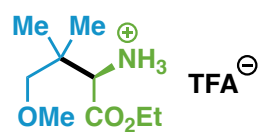

### *(R)*-1-ethoxy-4-methoxy-3,3-dimethyl-1-oxobutan-2-aminium (76b)

Product obtained as a white solid (4.1 mg). LC-MS data – Ret. time 1.99: MS ES+  $m/z$  190 ( $[M+H]^+$ ).

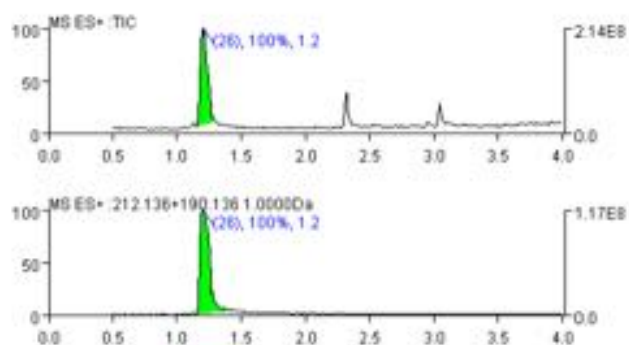

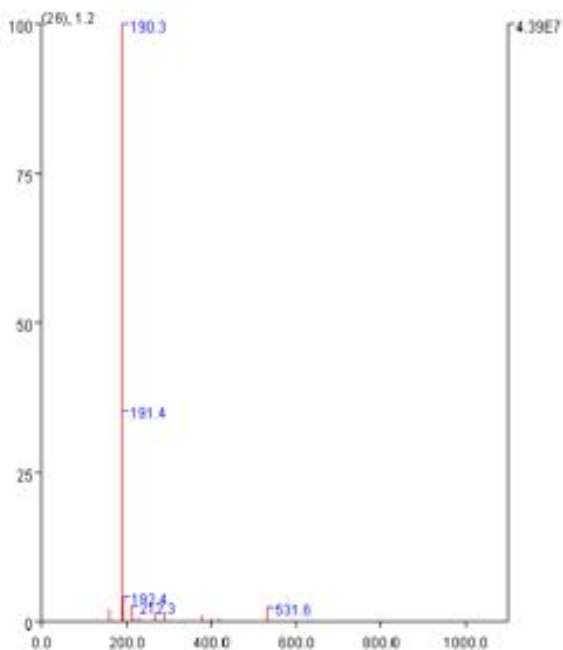

### Compound 77b

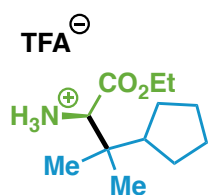

### *(R)*-3-cyclopentyl-1-ethoxy-3-methyl-1-oxobutan-2-aminium (77b)

Product obtained as an off-white solid (2.0 mg). LC-MS data – Ret. time 1.78: MS ES+  $m/z$  214 ( $[M+H]^+$ ).

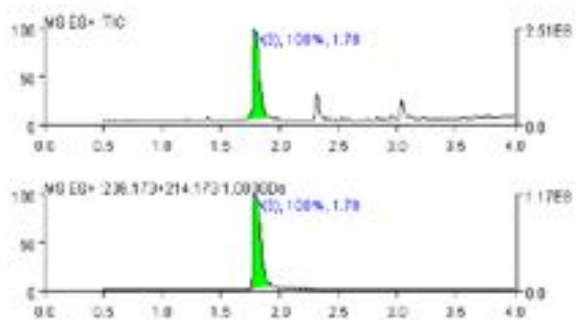

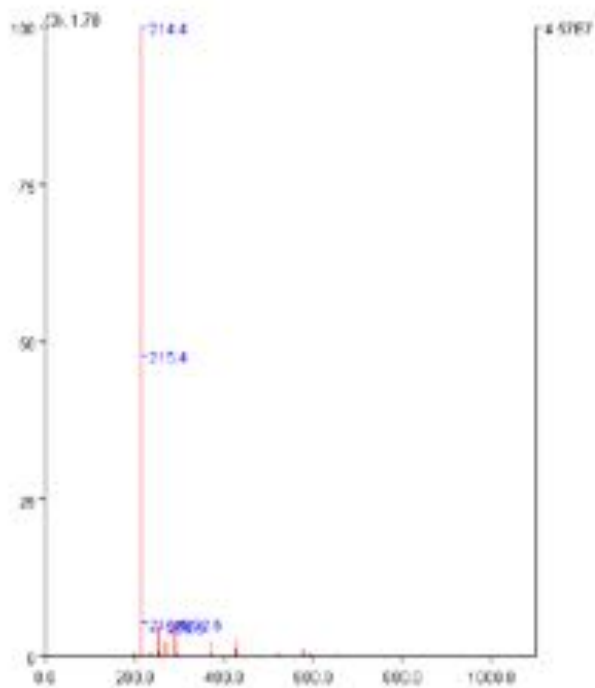

### Compound 78b

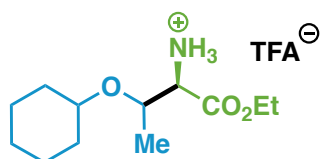

### *(2R,3R)*-3-(cyclohexyloxy)-1-ethoxy-1-oxobutan-2-aminium (78b)

Product obtained as an off-white solid (4.9 mg). LC-MS data – Ret. time 1.78: MS ES+  $m/z$  230 ( $[M+H]^+$ ).

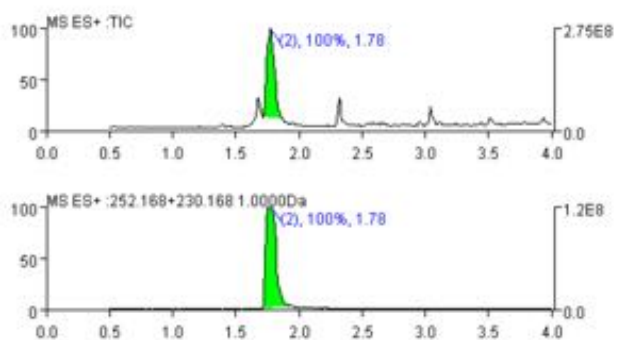



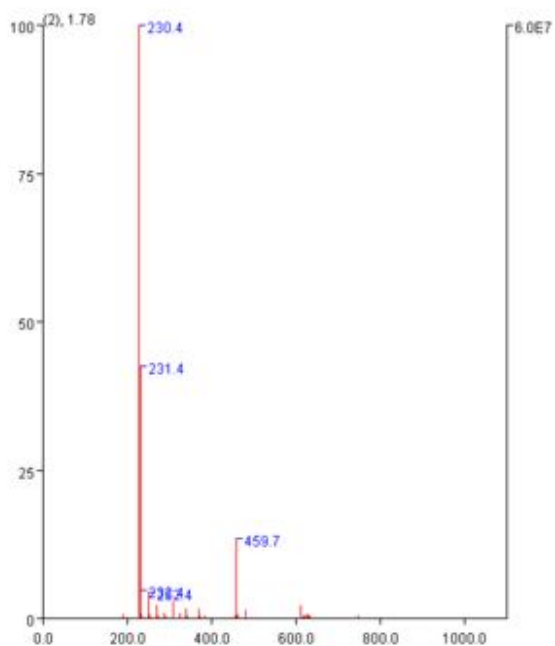

### Compound 79b

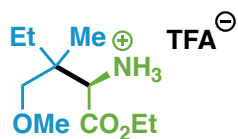

### *(2R)*-1-ethoxy-3-(methoxymethyl)-3-methyl-1-oxopentan-2-aminium (79b)

Product obtained as a white solid (10.5 mg). LC-MS data – Ret. time 1.08: MS ES+  $m/z$  204 ( $[M+H]^+$ ).

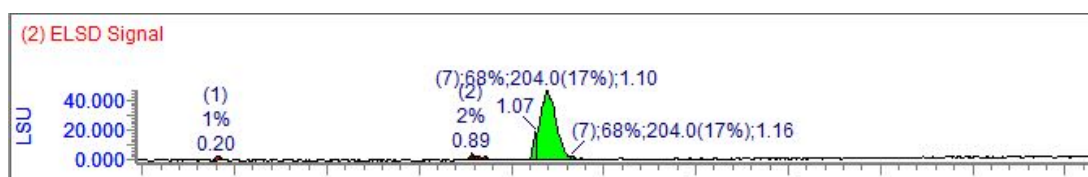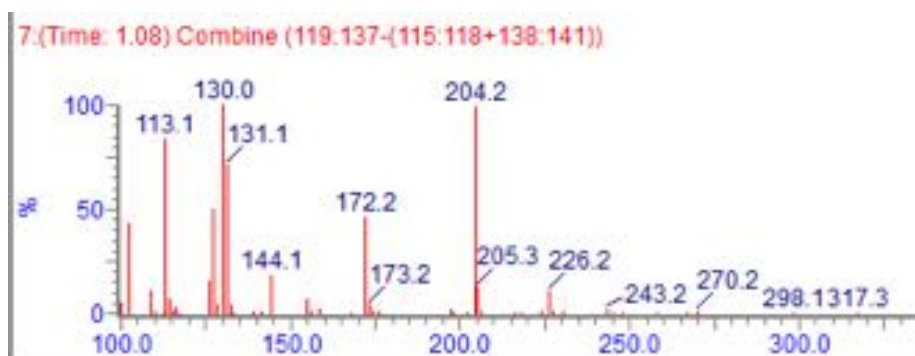

## Compound 80b

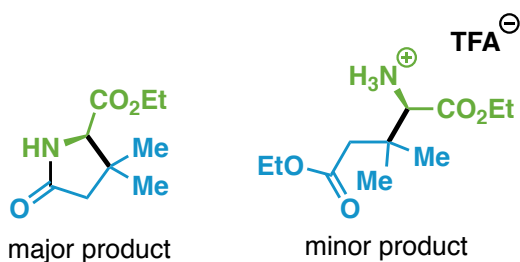

### *ethyl (R)-3,3-dimethyl-5-oxopyrrolidine-2-carboxylate (80b)*

Product obtained as an off-white solid (1.2 mg). LC-MS data – Ret. time 1.10: MS ES+  $m/z$  186 ( $[M+H]^+$ ).

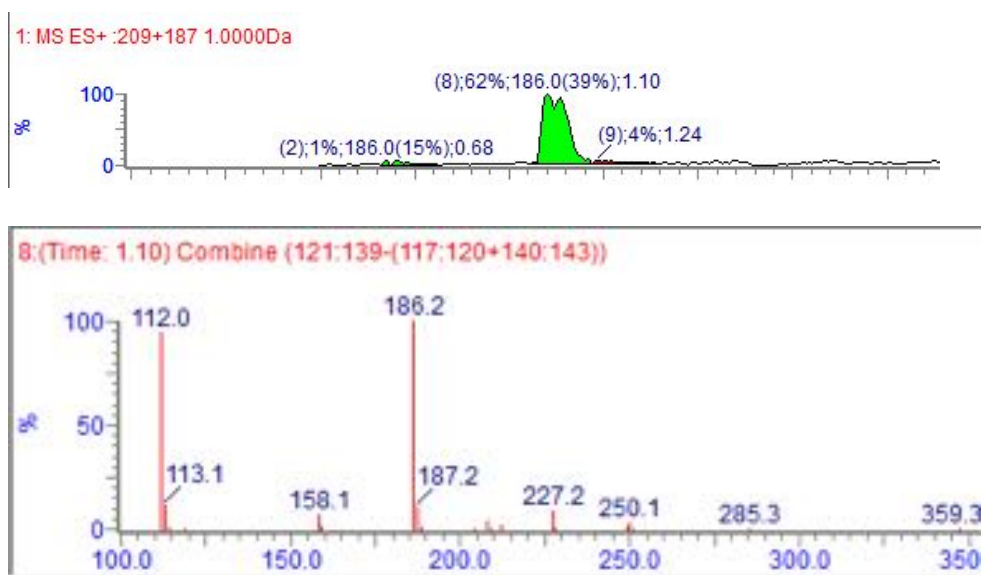

## Compound 82b

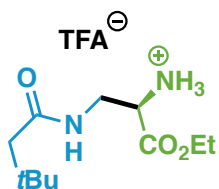

### *(R)-3-(3,3-dimethylbutanamido)-1-ethoxy-1-oxopropan-2-aminium (82b)*

Product obtained as a white solid (1.7 mg). LC-MS data – Ret. time 1.02: MS ES+  $m/z$  231 ( $[M+H]^+$ ).

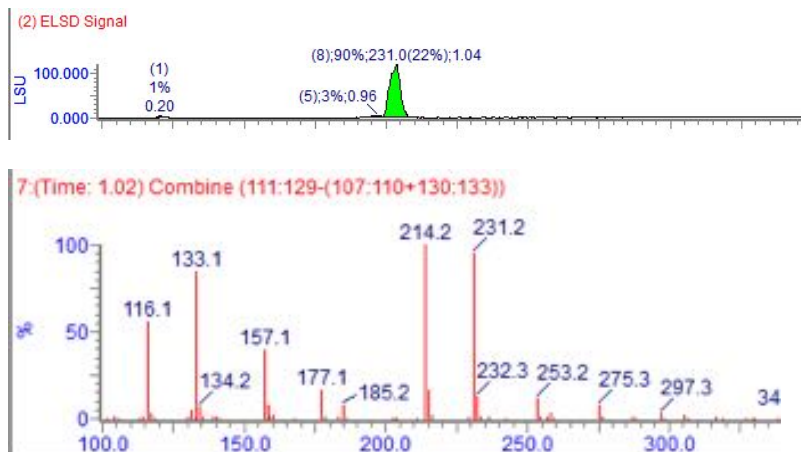

### Compound 84-1

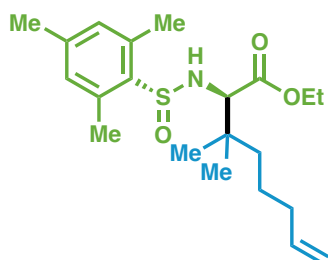

#### *ethyl (R)-2-(((R)-mesitylsulfinyl)amino)-3,3-dimethyloct-7-enoate (84-1).*

Following **General Procedure D** on 0.20 mmol scale. Purification by column chromatography (5-25% EtOAc/heptanes) afforded 8.0 mg (11%) of the title compound **84-1**.

**Physical State:** colorless oil.

$R_f = 0.73$  (2:1 hexanes:EtOAc).

$^1\text{H NMR}$  (500 MHz,  $\text{CDCl}_3$ ):  $\delta$  6.87 (s, 2H), 5.86 – 5.73 (m, 1H), 5.06 – 4.90 (m, 3H), 4.32 – 4.14 (m, 2H), 3.70 (d,  $J = 10.1$  Hz, 1H), 2.57 (s, 6H), 2.29 (s, 3H), 2.08 – 1.95 (m, 2H), 1.49 – 1.19 (m, 7H), 0.91 (s, 3H), 0.90 (s, 3H) ppm.

$^{13}\text{C NMR}$  (126 MHz,  $\text{CDCl}_3$ ):  $\delta$  172.9, 141.1, 138.8, 138.2, 136.9, 130.9, 114.8, 65.0, 61.5, 39.1, 37.7, 34.6, 23.9, 23.7, 23.3, 21.2, 19.4, 14.3 ppm.

**HRMS (ESI-TOF):** calc'd for  $\text{C}_{21}\text{H}_{34}\text{NO}_3\text{S}$   $[\text{M}+\text{H}]^+$ : 380.2259, found: 380.2260.

$[\alpha]_D^{20} = -128.0$  ( $c = 0.5$ ,  $\text{CHCl}_3$ ).

## Compound 84b

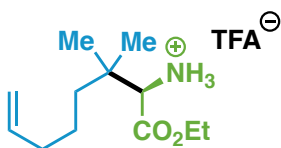

### *(R)*-1-ethoxy-3,3-dimethyl-1-oxooct-7-en-2-aminium (84b)

Product obtained as an off white solid (1.3 mg). LC-MS data – Ret. time 1.52: MS ES+  $m/z$  214 ( $[M+H]^+$ ).

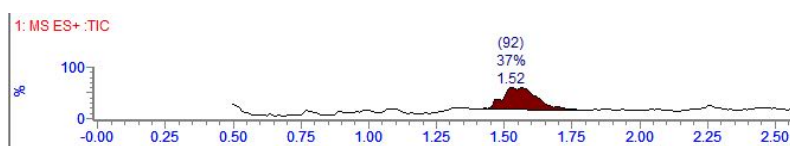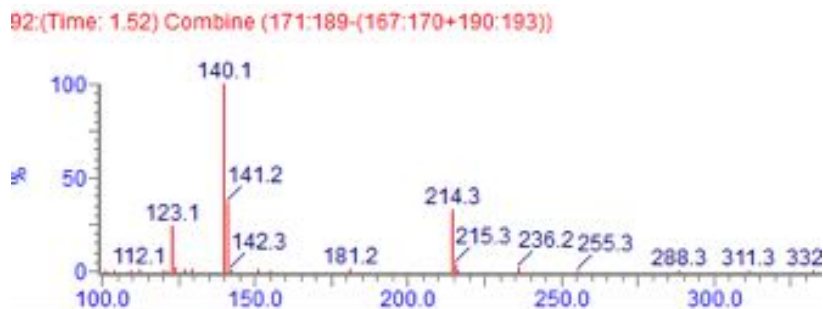

## Compound 85b

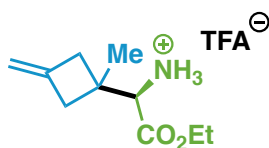

### *(R)*-2-ethoxy-1-(1-methyl-3-methylenecyclobutyl)-2-oxoethan-1-aminium (85b)

Product obtained as a white solid (3.6 mg). LC-MS data – Ret. time 1.12: MS ES+  $m/z$  184 ( $[M+H]^+$ ).

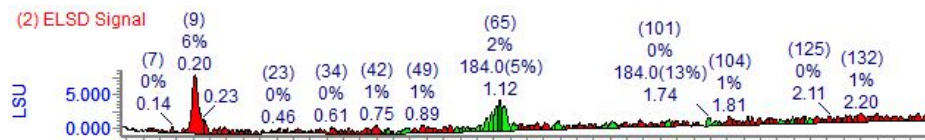

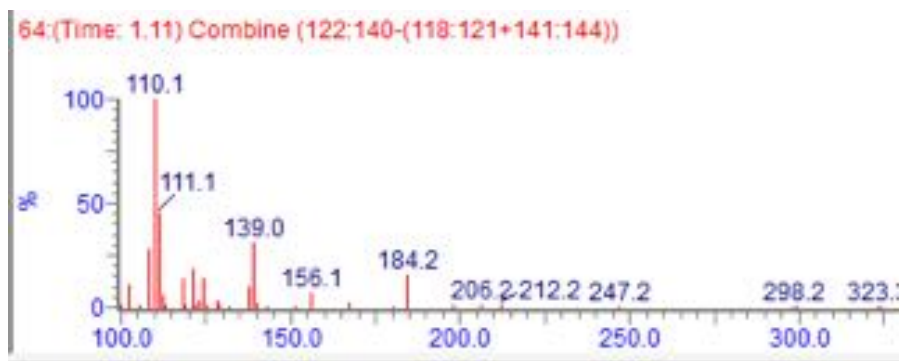

### Compound 86b

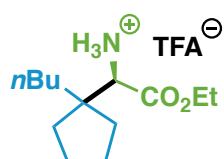

#### *(R)*-1-(1-butylcyclopentyl)-2-ethoxy-2-oxoethan-1-aminium (86b)

Product obtained as an off-white solid (8.0 mg). LC-MS data – Ret. time 1.51: MS ES+  $m/z$  228 ( $[M+H]^+$ ).

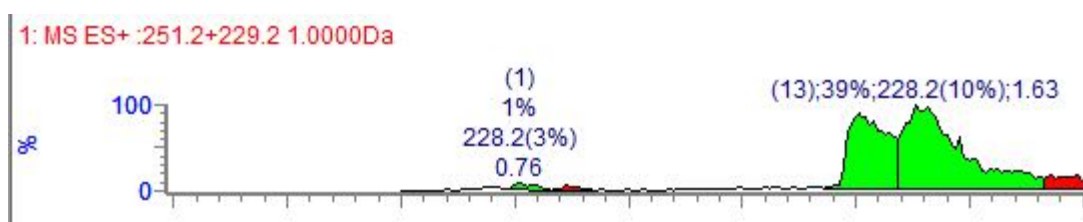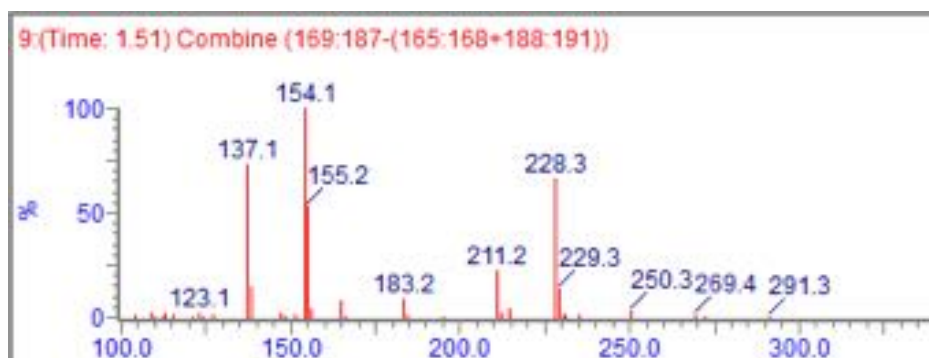

### Compound 87b

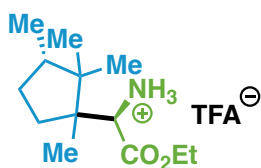

#### *(R)*-2-ethoxy-2-oxo-1-((1*S*,3*S*)-1,2,2,3-tetramethylcyclopentyl)ethan-1-aminium

(87b)

Product obtained as an off-white solid (1.1 mg),  $\beta$  stereochemistry unassigned.

LC-MS data – Ret. time 1.63: MS ES+  $m/z$  228 ( $[M+H]^+$ ).

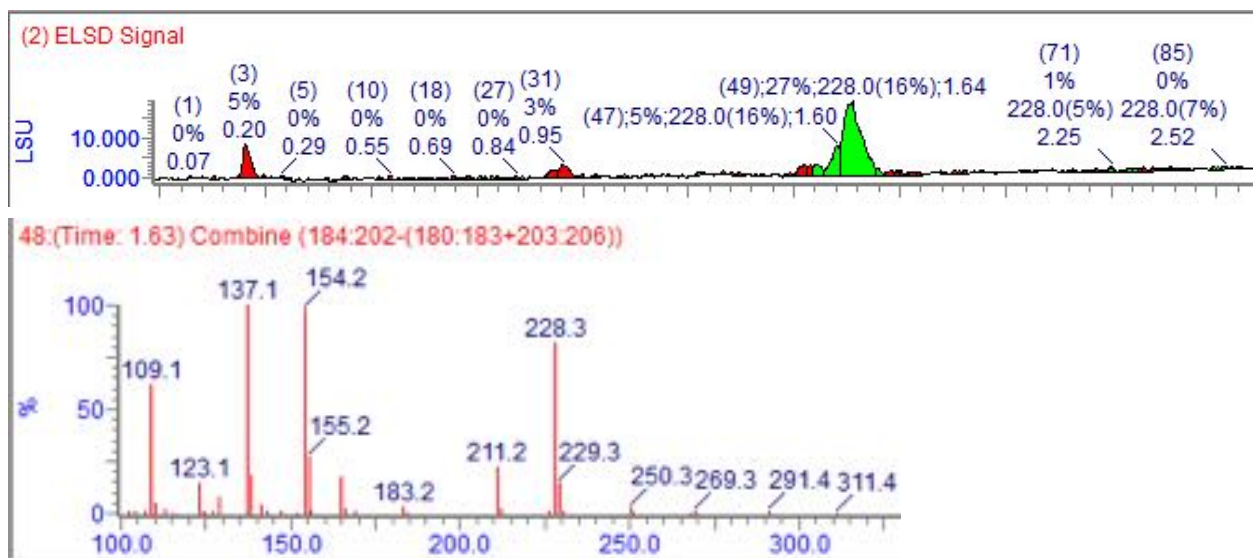

### Compound 88b

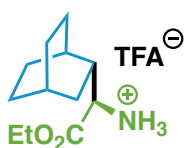

(*R*)-1-((1*S*,2*R*,4*S*)-bicyclo[2.2.2]octan-2-yl)-2-ethoxy-2-oxoethan-1-aminium (88b)

Product obtained as a white solid (1.8 mg). LC-MS data – Ret. time 1.36: MS ES+  $m/z$  212 ( $[M+H]^+$ ).

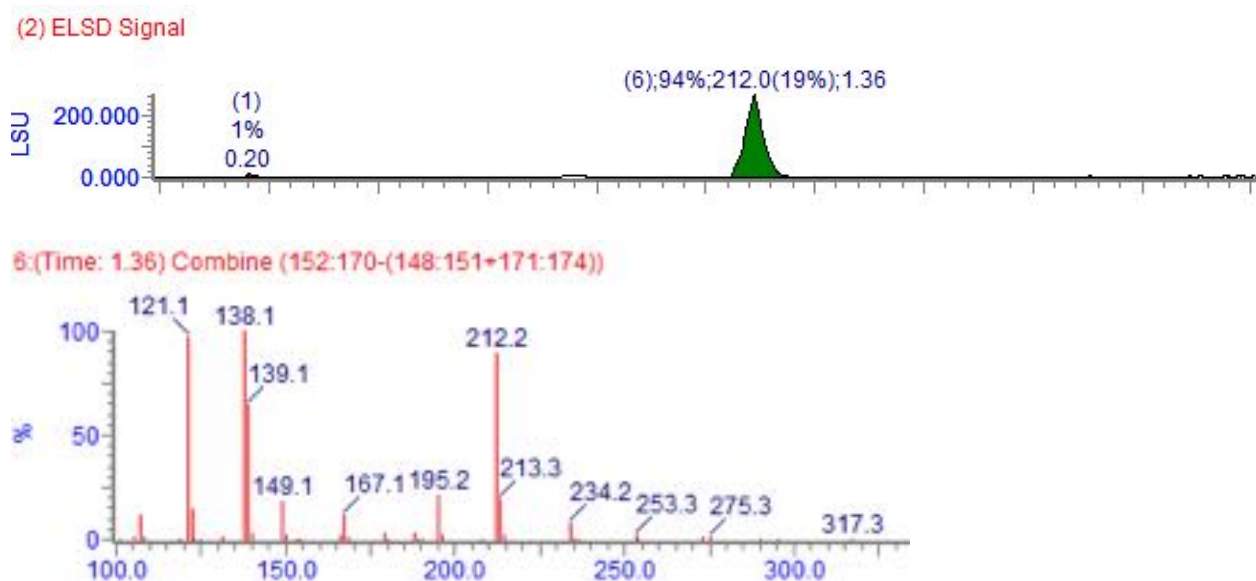

### Compound 89b

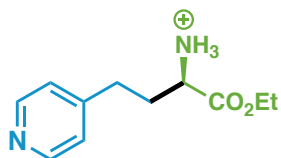

#### *(R)*-1-ethoxy-1-oxo-4-(pyridin-4-yl)butan-2-aminium (89b)

Product obtained as a white solid (1.1 mg). LC-MS data – Ret. time 0.41: MS ES+  $m/z$  209 ( $[M+H]^+$ ).

(2) ELSD Signal

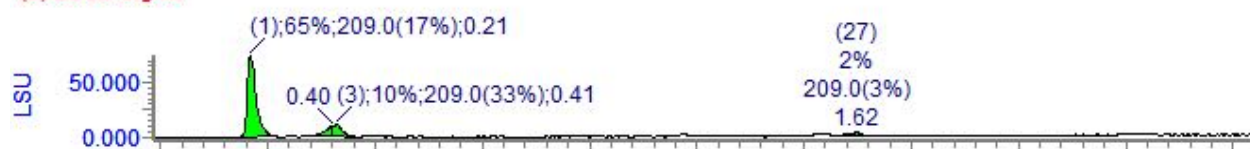

3:(Time: 0.41) Combine (39:58-(36:38+59:62))

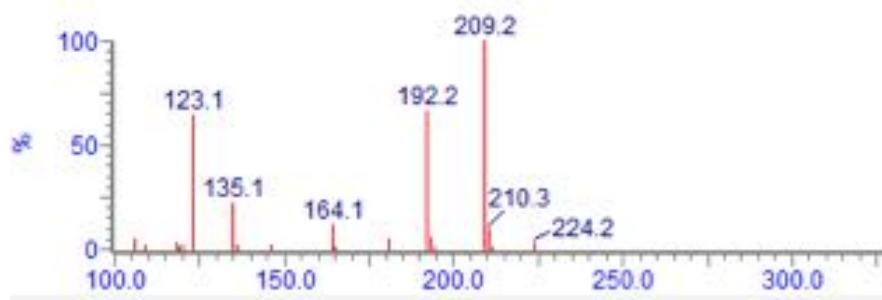

### Compound 91b

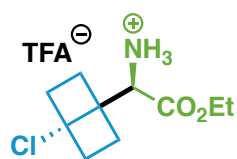

#### *(R)*-1-((1s,4R)-4-chlorobicyclo[2.2.0]hexan-1-yl)-2-ethoxy-2-oxoethan-1-aminium

#### (91b)

Product obtained as a white solid (2.8 mg). LC-MS data – Ret. time 1.12: MS ES+  $m/z$  218 ( $[M+H]^+$ ).

1: MS ES+ :TIC

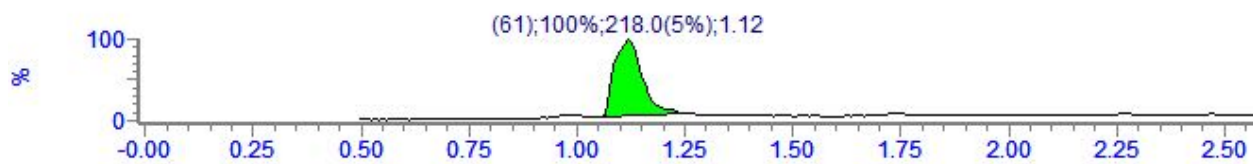

61:(Time: 1.12) Combine (123:141-(119:122+142:145))

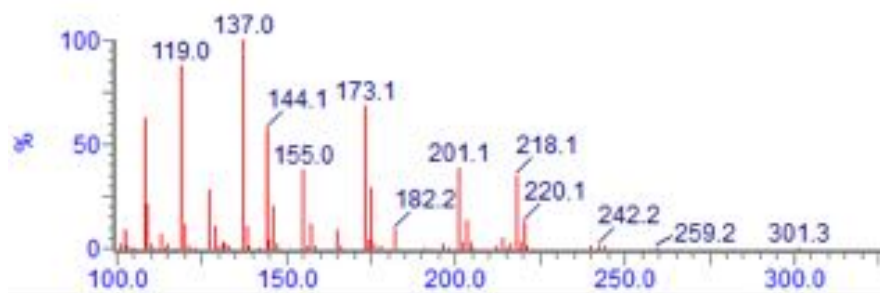

### Compound 92b

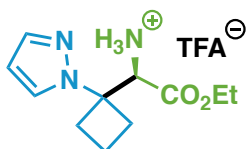

### (R)-1-(1-(1H-pyrazol-1-yl)cyclobutyl)-2-ethoxy-2-oxoethan-1-aminium (92b)

Product obtained as a colorless oil (1.5 mg). LC-MS data – Ret. time 0.96: MS ES+  $m/z$  224 ( $[M+H]^+$ ).

2: UV Detector: 107.5 Nm

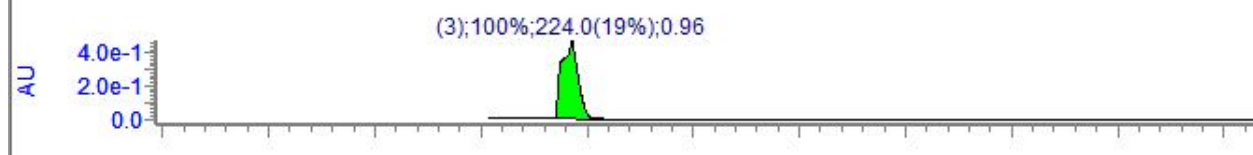

3:(Time: 0.96) Combine (104:123-(101:103+124:127))

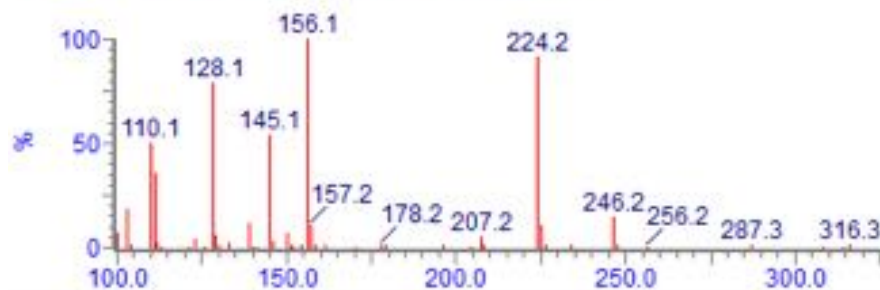



## Compound 94b

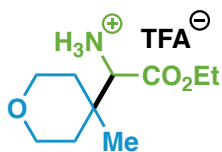

### *(R)*-2-ethoxy-1-(4-methyltetrahydro-2H-pyran-4-yl)-2-oxoethan-1-aminium (94b)

Product obtained as a white solid (1.7 mg). LC-MS data – Ret. time 0.72: MS ES+  $m/z$  202 ( $[M+H]^+$ ).

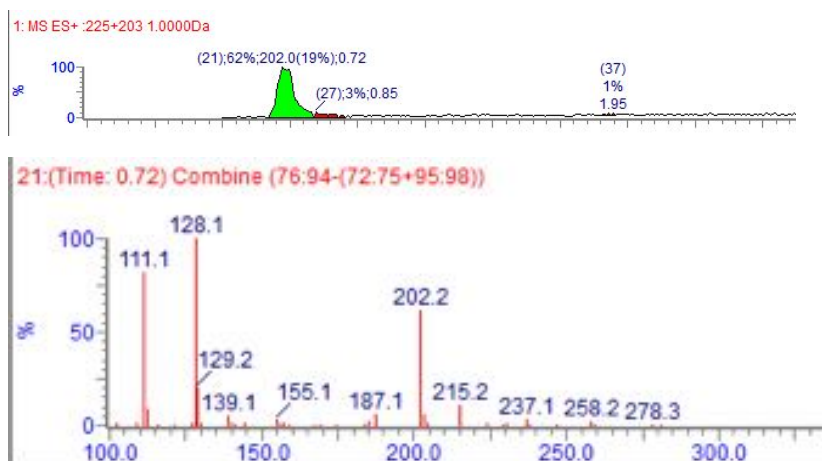

## Compound 95b

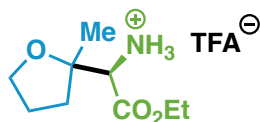

### *(R)*-2-ethoxy-1-(2-methyltetrahydrofuran-2-yl)-2-oxoethan-1-aminium (95b)

Product obtained as a colorless oil (5.0 mg). LC-MS data – Ret. time 0.72: MS ES+  $m/z$  188 ( $[M+H]^+$ ).

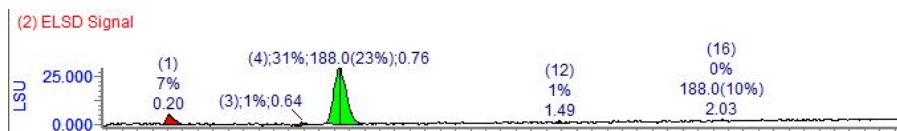

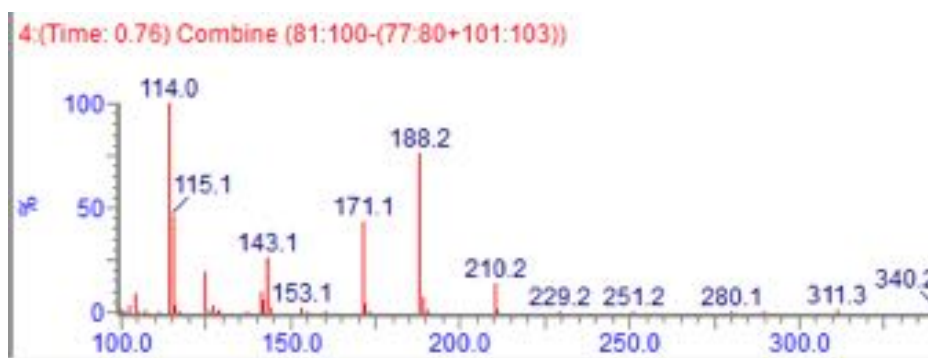

### Compound 96b

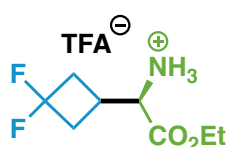

#### *(R)*-1-(3,3-difluorocyclobutyl)-2-ethoxy-2-oxoethan-1-aminium (96b)

Product obtained as an off-white solid (2.9 mg). LC-MS data – Ret. time 0.82: MS ES+  $m/z$  194 ( $[M+H]^+$ ).

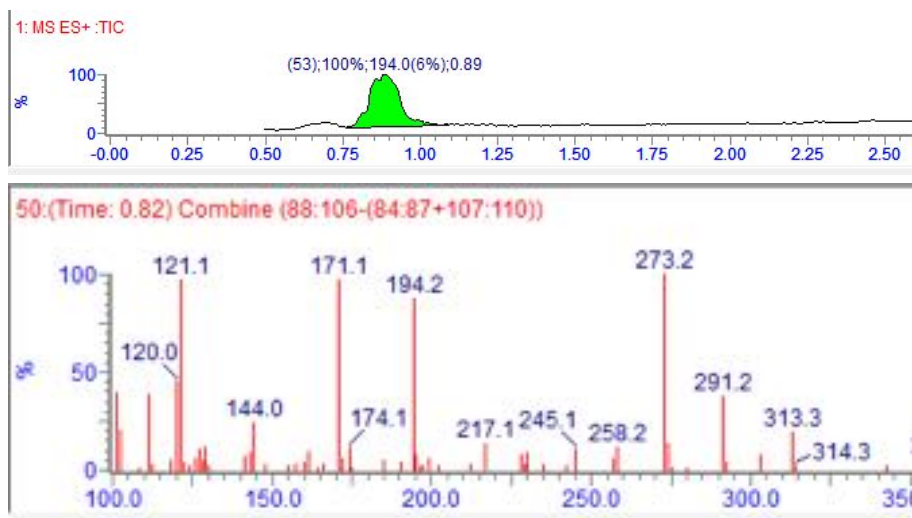

### Compound 97b

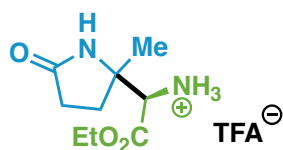

#### *(R)*-2-ethoxy-1-(2-methyl-5-oxopyrrolidin-2-yl)-2-oxoethan-1-aminium (97b)

Product obtained as a colorless oil (3.8 mg),  $\beta$  stereochemistry unassigned. LC-MS

data – Ret. time 0.50: MS ES+  $m/z$  201 ( $[M+H]^+$ ).

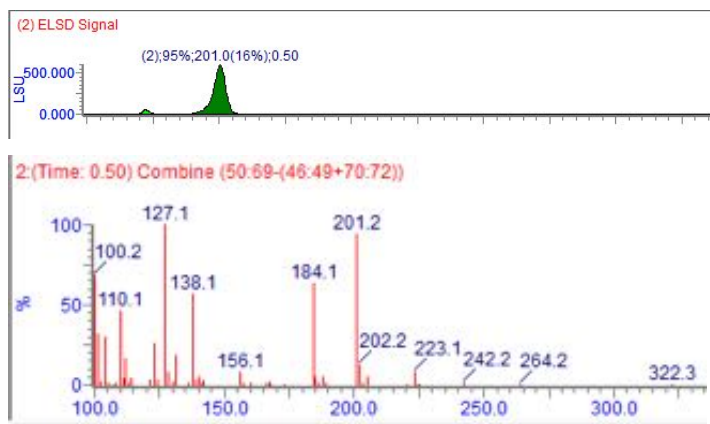

### X-Ray Crystallographic Data for Compound 3

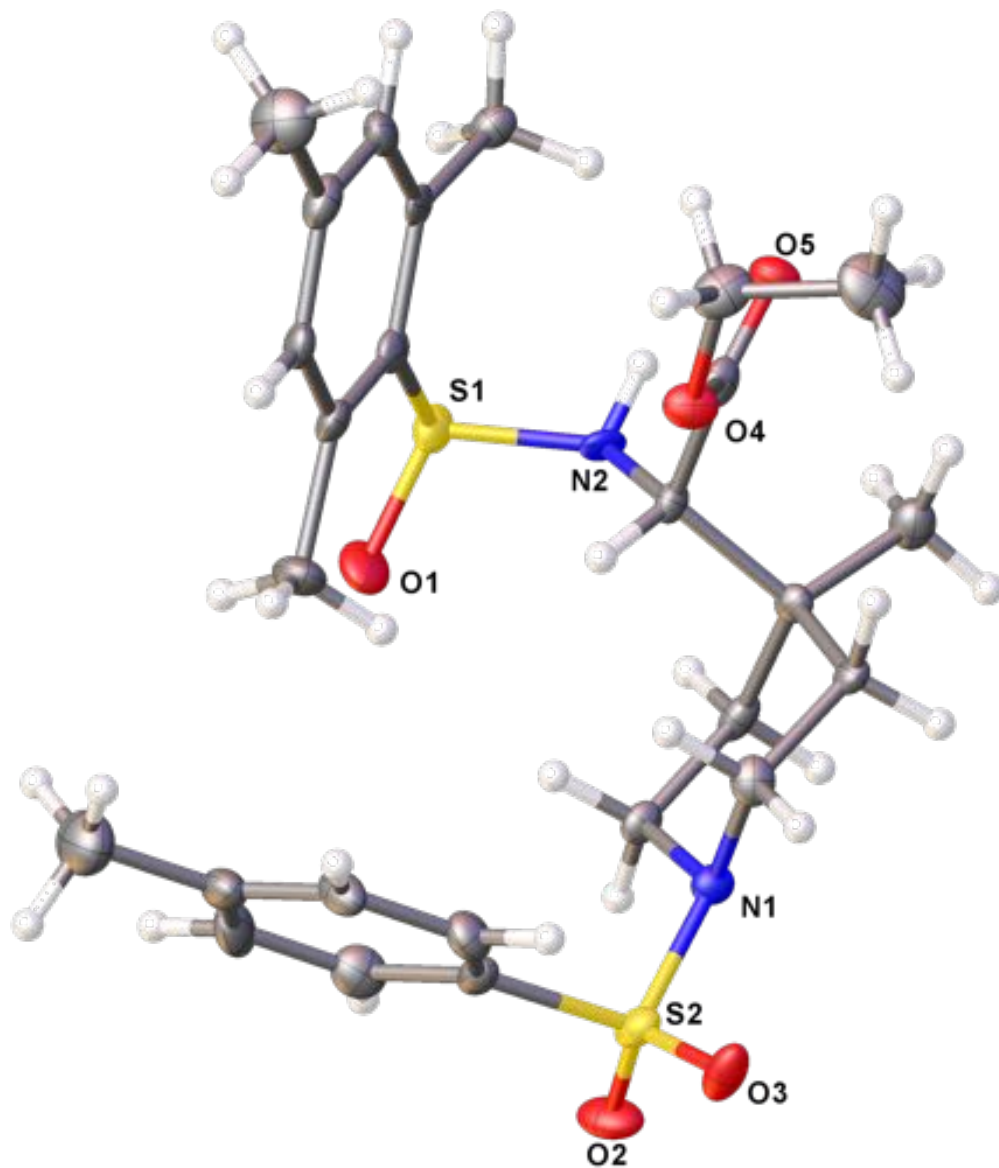

Table 1. Crystal data and structure refinement for compound **3**.

|                                   |                                                                              |           |
|-----------------------------------|------------------------------------------------------------------------------|-----------|
| Identification code               | CCDC 1861500                                                                 |           |
| Empirical formula                 | C <sub>26</sub> H <sub>36</sub> N <sub>2</sub> O <sub>5</sub> S <sub>2</sub> |           |
| Formula weight                    | 520.69                                                                       |           |
| Temperature                       | 100.0 K                                                                      |           |
| Wavelength                        | 0.71073 Å                                                                    |           |
| Crystal system                    | Trigonal                                                                     |           |
| Space group                       | P3 <sub>2</sub>                                                              |           |
| Unit cell dimensions              | a = 26.5285(11) Å                                                            | α = 90°.  |
|                                   | b = 26.5285(11) Å                                                            | β = 90°.  |
|                                   | c = 9.7658(5) Å                                                              | γ = 120°. |
| Volume                            | 5952.0(6) Å <sup>3</sup>                                                     |           |
| Z, Z'                             | 9, 3                                                                         |           |
| Density (calculated)              | 1.307 Mg/m <sup>3</sup>                                                      |           |
| Absorption coefficient            | 0.240 mm <sup>-1</sup>                                                       |           |
| F(000)                            | 2502                                                                         |           |
| Crystal size                      | 0.26 x 0.08 x 0.04 mm <sup>3</sup>                                           |           |
| Theta range for data collection   | 1.535 to 25.368°.                                                            |           |
| Index ranges                      | -29 ≤ h ≤ 27, -31 ≤ k ≤ 16, -11 ≤ l ≤ 11                                     |           |
| Reflections collected             | 25779                                                                        |           |
| Independent reflections           | 14453 [R(int) = 0.0434]                                                      |           |
| Completeness to theta = 25.242°   | 100.0 %                                                                      |           |
| Absorption correction             | Semi-empirical from equivalents                                              |           |
| Max. and min. transmission        | 0.6024 and 0.5280                                                            |           |
| Refinement method                 | Full-matrix least-squares on F <sup>2</sup>                                  |           |
| Data / restraints / parameters    | 14453 / 1 / 969                                                              |           |
| Goodness-of-fit on F <sup>2</sup> | 1.019                                                                        |           |
| Final R indices [I > 2σ(I)]       | R1 = 0.0443, wR2 = 0.0716                                                    |           |
| R indices (all data)              | R1 = 0.0570, wR2 = 0.0765                                                    |           |
| Absolute structure parameter      | 0.00(3)                                                                      |           |
| Extinction coefficient            | n/a                                                                          |           |
| Largest diff. peak and hole       | 0.236 and -0.241 e.Å <sup>-3</sup>                                           |           |

Table 2. Atomic coordinates ( $\times 10^4$ ) and equivalent isotropic displacement parameters ( $\text{\AA}^2 \times 10^3$ )

for compound **3**.  $U(\text{eq})$  is defined as one third of the trace of the orthogonalized  $U^{ij}$  tensor.

|         | x        | y       | z        | $U(\text{eq})$ |
|---------|----------|---------|----------|----------------|
| S(2)    | 3986(1)  | 2403(1) | 12013(2) | 21(1)          |
| S(2'')  | 7521(1)  | 7560(1) | 6733(2)  | 24(1)          |
| S(1'')  | 10015(1) | 9326(1) | 9323(2)  | 24(1)          |
| S(1')   | 4116(1)  | 6855(1) | 901(2)   | 16(1)          |
| S(1)    | 6444(1)  | 3926(1) | 8754(2)  | 21(1)          |
| S(2')   | 3579(1)  | 4384(1) | -2290(2) | 26(1)          |
| O(4'')  | 9897(2)  | 7771(2) | 7270(5)  | 20(1)          |
| O(4)    | 5727(2)  | 4904(2) | 10534(5) | 22(1)          |
| O(1)    | 5960(2)  | 3322(2) | 8522(5)  | 31(1)          |
| C(24')  | 3393(3)  | 4268(3) | 1805(7)  | 23(2)          |
| C(2'')  | 9685(3)  | 8308(3) | 10913(7) | 18(2)          |
| O(3')   | 3923(2)  | 4194(2) | -3034(5) | 34(1)          |
| O(3)    | 3602(2)  | 2528(2) | 12791(5) | 28(1)          |
| O(1')   | 3629(2)  | 6251(2) | 1140(5)  | 24(1)          |
| O(2')   | 2958(2)  | 4100(2) | -2506(5) | 36(1)          |
| C(5)    | 6593(3)  | 5369(3) | 6975(7)  | 21(2)          |
| C(11'') | 10181(3) | 8339(3) | 7021(7)  | 21(2)          |
| N(1)    | 4657(2)  | 2931(2) | 12387(6) | 17(1)          |
| N(2)    | 6457(2)  | 4119(2) | 10353(6) | 18(1)          |
| O(2'')  | 7292(2)  | 7950(2) | 6669(5)  | 29(1)          |
| O(3'')  | 7249(2)  | 7028(2) | 5937(5)  | 31(1)          |
| O(5')   | 5424(2)  | 6450(2) | -604(5)  | 28(1)          |
| O(5'')  | 10687(2) | 8623(2) | 6688(5)  | 27(1)          |
| C(17)   | 4745(3)  | 3518(3) | 12306(7) | 20(2)          |
| N(1'')  | 8201(2)  | 7927(2) | 6239(6)  | 23(1)          |
| O(5)    | 6653(2)  | 5230(2) | 11201(5) | 22(1)          |
| C(6)    | 6696(3)  | 4980(3) | 7713(7)  | 17(1)          |
| C(10)   | 5993(3)  | 4191(2) | 10973(7) | 14(1)          |
| C(21'') | 7455(3)  | 6833(3) | 8782(8)  | 27(2)          |
| C(10'') | 9770(3)  | 8587(3) | 7171(7)  | 15(1)          |
| C(4)    | 6050(3)  | 5206(3) | 6468(7)  | 23(2)          |
| N(2')   | 4392(2)  | 6927(2) | -657(6)  | 14(1)          |

|        |          |         |          |       |
|--------|----------|---------|----------|-------|
| C(1)   | 6237(3)  | 4403(3) | 7906(7)  | 18(2) |
| C(6')  | 5191(3)  | 7521(3) | 1979(7)  | 15(1) |
| C(2)   | 5684(3)  | 4228(3) | 7397(7)  | 20(2) |
| C(20') | 3702(3)  | 4349(3) | -532(7)  | 20(2) |
| C(23') | 3928(3)  | 4367(3) | 2255(6)  | 16(1) |
| C(23)  | 3705(3)  | 2606(3) | 7511(8)  | 26(2) |
| O(2)   | 3978(2)  | 1863(2) | 12195(5) | 32(1) |
| C(1")  | 10126(3) | 8798(3) | 10247(7) | 18(1) |
| C(17") | 8517(3)  | 7605(3) | 6172(7)  | 22(2) |
| C(15)  | 6364(3)  | 4276(3) | 13436(7) | 24(2) |
| O(1")  | 9401(2)  | 9175(2) | 9593(5)  | 31(1) |
| C(21') | 4244(3)  | 4449(3) | -97(7)   | 21(2) |
| C(18') | 3529(3)  | 5348(3) | -2077(7) | 21(2) |
| C(19)  | 5703(2)  | 3293(3) | 12428(7) | 18(2) |
| C(18") | 8561(3)  | 8522(3) | 6872(8)  | 25(2) |
| C(14') | 4404(3)  | 6358(3) | -2668(7) | 16(2) |
| C(19") | 9096(3)  | 8874(3) | 5983(7)  | 21(2) |
| C(13") | 10588(3) | 7571(3) | 8478(8)  | 33(2) |
| C(13') | 6458(3)  | 8213(3) | -912(10) | 43(2) |
| C(26)  | 3613(4)  | 2675(3) | 5998(9)  | 43(2) |
| C(16)  | 5313(2)  | 3940(3) | 13013(7) | 15(1) |
| C(12') | 6187(3)  | 7575(3) | -880(9)  | 31(2) |
| C(3")  | 9858(3)  | 8000(3) | 11780(7) | 28(2) |
| C(25)  | 4029(3)  | 2202(3) | 9287(8)  | 27(2) |
| C(1')  | 4741(3)  | 6943(3) | 1858(7)  | 14(1) |
| C(22') | 4348(3)  | 4462(3) | 1286(7)  | 17(1) |
| C(4")  | 10425(4) | 8162(3) | 12029(8) | 36(2) |
| O(4')  | 5560(2)  | 7338(2) | -1116(5) | 24(1) |
| C(7')  | 4318(3)  | 5858(3) | 2440(8)  | 30(2) |
| C(7)   | 5159(3)  | 3623(3) | 7526(8)  | 30(2) |
| C(22") | 7438(3)  | 6680(3) | 10121(8) | 35(2) |
| C(24") | 7518(3)  | 7570(3) | 10843(7) | 24(2) |
| C(16') | 4684(3)  | 6007(3) | -3265(7) | 22(2) |
| C(14") | 9474(3)  | 8582(3) | 5771(7)  | 19(2) |
| C(15") | 9927(3)  | 8914(3) | 4668(7)  | 21(2) |
| C(6")  | 10716(3) | 8967(3) | 10421(7) | 27(2) |
| C(26') | 4051(3)  | 4375(3) | 3775(7)  | 22(2) |
| C(3')  | 5274(3)  | 6636(3) | 3271(7)  | 19(2) |

|        |          |         |           |       |
|--------|----------|---------|-----------|-------|
| C(20") | 7511(3)  | 7369(3) | 8471(7)   | 18(2) |
| C(25") | 7550(3)  | 7744(3) | 9513(8)   | 25(2) |
| N(1')  | 3838(2)  | 5078(2) | -2670(6)  | 19(1) |
| C(8")  | 10593(4) | 7837(4) | 13039(10) | 63(3) |
| C(14)  | 5851(2)  | 3929(3) | 12462(6)  | 15(1) |
| C(4')  | 5716(3)  | 7194(3) | 3425(7)   | 27(2) |
| C(8)   | 5942(3)  | 5641(3) | 5674(9)   | 38(2) |
| C(9")  | 11192(3) | 9460(4) | 9646(9)   | 46(2) |
| C(9')  | 5186(3)  | 8025(3) | 1260(7)   | 21(2) |
| C(5')  | 5676(3)  | 7640(3) | 2758(7)   | 21(2) |
| C(5")  | 10852(3) | 8644(4) | 11311(8)  | 36(2) |
| C(2')  | 4769(3)  | 6484(3) | 2513(7)   | 17(1) |
| C(20)  | 3872(3)  | 2477(3) | 10277(7)  | 19(2) |
| C(7")  | 9041(3)  | 8076(3) | 10756(8)  | 29(2) |
| C(11') | 5236(3)  | 6766(3) | -900(7)   | 21(2) |
| N(2")  | 10087(2) | 9177(2) | 7734(6)   | 26(1) |
| C(22)  | 3554(3)  | 2878(3) | 8494(7)   | 24(2) |
| C(25') | 3276(3)  | 4269(3) | 433(7)    | 21(2) |
| C(11)  | 6171(3)  | 4833(3) | 10938(7)  | 19(2) |
| C(15') | 4589(3)  | 6890(3) | -3588(7)  | 24(2) |
| C(8')  | 6249(3)  | 7339(3) | 4294(9)   | 39(2) |
| C(16") | 9061(3)  | 7947(2) | 5288(7)   | 19(2) |
| C(3)   | 5596(3)  | 4636(3) | 6683(6)   | 19(2) |
| C(17') | 4486(3)  | 5435(3) | -2555(7)  | 24(2) |
| C(13)  | 5865(3)  | 5788(3) | 11661(9)  | 39(2) |
| C(12") | 10236(3) | 7476(3) | 7166(7)   | 21(2) |
| C(23") | 7470(3)  | 7037(3) | 11184(8)  | 31(2) |
| C(21)  | 3632(3)  | 2813(3) | 9870(7)   | 23(2) |
| C(10') | 4581(3)  | 6527(3) | -1145(7)  | 16(1) |
| C(9)   | 7296(3)  | 5199(3) | 8346(7)   | 20(2) |
| C(12)  | 5862(3)  | 5508(3) | 10351(8)  | 27(2) |
| C(18)  | 5133(2)  | 2875(3) | 11734(7)  | 16(1) |
| C(19') | 3746(3)  | 5955(3) | -2724(7)  | 18(2) |
| C(24)  | 3945(3)  | 2270(3) | 7928(8)   | 30(2) |
| C(26") | 7453(4)  | 6862(4) | 12680(8)  | 49(2) |



## X-Ray Crystallographic Data for Compound 50

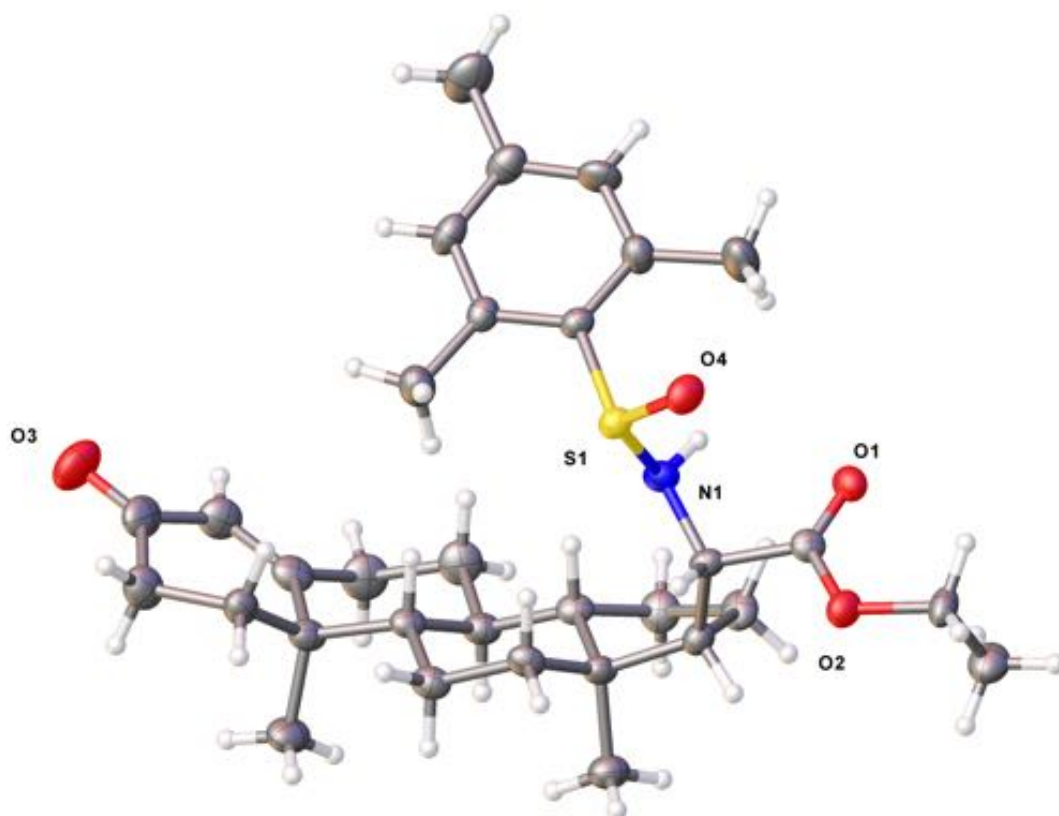

Table 1. Crystal data and structure refinement for compound **50**.

|                                   |                                                                                          |          |
|-----------------------------------|------------------------------------------------------------------------------------------|----------|
| Identification code               | CCDC 1861501                                                                             |          |
| Empirical formula                 | C <sub>35</sub> H <sub>52</sub> N O <sub>4</sub> S                                       |          |
| Molecular formula                 | C <sub>32</sub> H <sub>45</sub> N O <sub>4</sub> S, 0.5(C <sub>6</sub> H <sub>14</sub> ) |          |
| Formula weight                    | 582.83                                                                                   |          |
| Temperature                       | 100.0 K                                                                                  |          |
| Wavelength                        | 0.71073 Å                                                                                |          |
| Crystal system                    | Orthorhombic                                                                             |          |
| Space group                       | P2 <sub>1</sub> 2 <sub>1</sub> 2 <sub>1</sub>                                            |          |
| Unit cell dimensions              | a = 9.5622(3) Å                                                                          | α = 90°. |
|                                   | b = 23.5391(6) Å                                                                         | β = 90°. |
|                                   | c = 28.7418(9) Å                                                                         | γ = 90°. |
| Volume                            | 6469.4(3) Å <sup>3</sup>                                                                 |          |
| Z                                 | 8                                                                                        |          |
| Density (calculated)              | 1.197 Mg/m <sup>3</sup>                                                                  |          |
| Absorption coefficient            | 0.138 mm <sup>-1</sup>                                                                   |          |
| F(000)                            | 2536                                                                                     |          |
| Crystal size                      | 0.178 x 0.052 x 0.011 mm <sup>3</sup>                                                    |          |
| Crystal color, habit              | Colorless Needle                                                                         |          |
| Theta range for data collection   | 1.118 to 25.363°.                                                                        |          |
| Index ranges                      | -11 ≤ h ≤ 11, -28 ≤ k ≤ 28, -33 ≤ l ≤ 34                                                 |          |
| Reflections collected             | 53939                                                                                    |          |
| Independent reflections           | 11733 [R(int) = 0.0655, R(sigma) = 0.0697]                                               |          |
| Completeness to theta = 25.000°   | 99.9 %                                                                                   |          |
| Absorption correction             | Semi-empirical from equivalents                                                          |          |
| Max. and min. transmission        | 0.2590 and 0.2268                                                                        |          |
| Refinement method                 | Full-matrix least-squares on F <sup>2</sup>                                              |          |
| Data / restraints / parameters    | 11733 / 3 / 761                                                                          |          |
| Goodness-of-fit on F <sup>2</sup> | 1.054                                                                                    |          |
| Final R indices [I > 2σ(I)]       | R1 = 0.0596, wR2 = 0.1169                                                                |          |
| R indices (all data)              | R1 = 0.0962, wR2 = 0.1293                                                                |          |
| Absolute structure parameter      | 0.02(3)                                                                                  |          |
| Extinction coefficient            | n/a                                                                                      |          |
| Largest diff. peak and hole       | 0.376 and -0.338 e.Å <sup>-3</sup>                                                       |          |

Table 2. Atomic coordinates ( $\times 10^4$ ) and equivalent isotropic displacement parameters ( $\text{\AA}^2 \times 10^3$ )

for compound **50**.  $U(\text{eq})$  is defined as one third of the trace of the orthogonalized  $U^{ij}$  tensor.

|       | x        | y        | z       | $U(\text{eq})$ |
|-------|----------|----------|---------|----------------|
| S(1)  | 3370(1)  | 7658(1)  | 6449(1) | 24(1)          |
| O(1)  | 1319(4)  | 6576(1)  | 5783(1) | 30(1)          |
| O(2)  | 778(4)   | 6162(1)  | 6464(1) | 31(1)          |
| O(3)  | 1279(5)  | 11283(2) | 7088(2) | 56(1)          |
| O(4)  | 4200(4)  | 7134(1)  | 6386(1) | 33(1)          |
| N(1)  | 1760(5)  | 7604(2)  | 6221(1) | 25(1)          |
| C(1)  | 1041(5)  | 6607(2)  | 6189(2) | 24(1)          |
| C(2)  | 901(5)   | 7166(2)  | 6450(2) | 23(1)          |
| C(3)  | -674(5)  | 7316(2)  | 6484(2) | 26(1)          |
| C(4)  | -1371(6) | 7420(2)  | 6001(2) | 32(1)          |
| C(5)  | -1891(6) | 8041(2)  | 5997(2) | 34(1)          |
| C(6)  | -1081(5) | 8318(2)  | 6391(2) | 25(1)          |
| C(7)  | -1032(5) | 7855(2)  | 6768(2) | 25(1)          |
| C(8)  | -44(6)   | 8042(2)  | 7152(2) | 27(1)          |
| C(9)  | -456(6)  | 8629(2)  | 7345(2) | 29(1)          |
| C(10) | -540(6)  | 9084(2)  | 6961(2) | 25(1)          |
| C(11) | -1510(6) | 8906(2)  | 6563(2) | 29(1)          |
| C(12) | -1462(7) | 9339(2)  | 6176(2) | 38(1)          |
| C(13) | -1784(7) | 9934(2)  | 6351(2) | 42(2)          |
| C(14) | -869(6)  | 10108(2) | 6745(2) | 32(1)          |
| C(15) | -787(6)  | 9698(2)  | 7154(2) | 29(1)          |
| C(16) | 450(6)   | 9861(2)  | 7473(2) | 31(1)          |
| C(17) | 568(7)   | 10503(2) | 7562(2) | 40(2)          |
| C(18) | 645(7)   | 10834(2) | 7116(2) | 40(2)          |
| C(19) | -158(6)  | 10599(2) | 6731(2) | 38(1)          |
| C(20) | -2502(6) | 7744(2)  | 6978(2) | 36(1)          |
| C(21) | -2174(6) | 9735(2)  | 7431(2) | 43(2)          |
| C(22) | 691(6)   | 5604(2)  | 6239(2) | 32(1)          |
| C(23) | -782(6)  | 5499(2)  | 6073(2) | 42(2)          |
| C(24) | 4000(5)  | 8185(2)  | 6047(2) | 24(1)          |
| C(25) | 4360(6)  | 8051(2)  | 5585(2) | 32(1)          |
| C(26) | 4951(6)  | 8483(2)  | 5320(2) | 36(1)          |

|        |         |         |         |        |
|--------|---------|---------|---------|--------|
| C(27)  | 5198(6) | 9023(2) | 5490(2) | 36(1)  |
| C(28)  | 4821(6) | 9135(2) | 5945(2) | 33(1)  |
| C(29)  | 4221(5) | 8722(2) | 6232(2) | 26(1)  |
| C(30)  | 4158(8) | 7474(2) | 5367(2) | 49(2)  |
| C(31)  | 5850(8) | 9478(3) | 5184(2) | 56(2)  |
| C(32)  | 3869(6) | 8870(2) | 6726(2) | 38(2)  |
| S(1')  | 1575(1) | 3782(1) | 6318(1) | 24(1)  |
| O(1')  | 3609(4) | 4929(2) | 5706(2) | 46(1)  |
| O(2')  | 4146(4) | 5267(2) | 6425(2) | 49(1)  |
| O(3')  | 3869(6) | 197(2)  | 7066(3) | 119(3) |
| O(4')  | 733(4)  | 4311(1) | 6290(1) | 34(1)  |
| N(1')  | 3182(4) | 3857(2) | 6084(1) | 26(1)  |
| C(1')  | 3894(6) | 4860(2) | 6109(2) | 39(2)  |
| C(2')  | 4026(5) | 4281(2) | 6331(2) | 28(1)  |
| C(3')  | 5609(6) | 4129(2) | 6345(2) | 32(1)  |
| C(4')  | 6267(6) | 4022(2) | 5858(2) | 38(2)  |
| C(5')  | 6788(6) | 3403(2) | 5853(2) | 38(1)  |
| C(6')  | 6025(5) | 3121(2) | 6256(2) | 26(1)  |
| C(7')  | 6015(5) | 3592(2) | 6633(2) | 26(1)  |
| C(8')  | 5045(5) | 3405(2) | 7021(2) | 26(1)  |
| C(9')  | 5519(6) | 2830(2) | 7221(2) | 27(1)  |
| C(10') | 5593(5) | 2367(2) | 6846(2) | 26(1)  |
| C(11') | 6499(5) | 2545(2) | 6430(2) | 26(1)  |
| C(12') | 6385(6) | 2100(2) | 6050(2) | 37(1)  |
| C(13') | 6770(7) | 1509(2) | 6226(2) | 44(2)  |
| C(14') | 5951(6) | 1353(2) | 6648(2) | 36(1)  |
| C(15') | 5945(6) | 1770(2) | 7047(2) | 32(1)  |
| C(16') | 4801(6) | 1615(2) | 7406(2) | 42(2)  |
| C(17') | 4747(8) | 978(3)  | 7505(3) | 69(2)  |
| C(18') | 4542(8) | 646(3)  | 7078(4) | 75(3)  |
| C(19') | 5255(7) | 855(3)  | 6661(3) | 57(2)  |
| C(20') | 7482(6) | 3702(2) | 6827(2) | 37(1)  |
| C(21') | 7399(6) | 1761(2) | 7285(2) | 36(1)  |
| C(22') | 4253(7) | 5847(2) | 6250(3) | 68(2)  |
| C(23') | 5788(7) | 5978(3) | 6176(3) | 78(3)  |
| C(24') | 916(5)  | 3297(2) | 5892(2) | 20(1)  |
| C(25') | 501(5)  | 3473(2) | 5444(2) | 26(1)  |
| C(26') | -130(6) | 3074(2) | 5157(2) | 30(1)  |

|        |          |          |         |        |
|--------|----------|----------|---------|--------|
| C(27') | -350(5)  | 2516(2)  | 5294(2) | 33(1)  |
| C(28') | 83(6)    | 2355(2)  | 5736(2) | 34(1)  |
| C(29') | 713(5)   | 2736(2)  | 6040(2) | 24(1)  |
| C(30') | 673(7)   | 4074(2)  | 5263(2) | 40(2)  |
| C(31') | -1079(7) | 2102(3)  | 4976(2) | 47(2)  |
| C(32') | 1134(6)  | 2542(2)  | 6520(2) | 35(1)  |
| C(1S)  | 2641(7)  | 11219(3) | 5809(3) | 67(2)  |
| C(2S)  | 1852(11) | 10878(4) | 5514(3) | 102(3) |
| C(3S)  | 2037(12) | 10270(4) | 5560(3) | 104(4) |
| C(4S)  | 1212(11) | 9928(4)  | 5295(3) | 94(3)  |
| C(5S)  | 1495(16) | 9340(7)  | 5261(6) | 225(9) |
| C(6S)  | 611(14)  | 8862(5)  | 5078(4) | 140(4) |

---

## References

1. a) J. Cornella, J. T. Edwards, T. Qin, S. Kawamura, J. Wang, C. M. Pan, R. Gianatassio, M. Schmidt, M. D. Eastgate, P. S. Baran, *J. Am. Chem. Soc.* **2016**, *138*, 2174; b) F. Toriyama, J. Cornella, L. Wimmer, T.-G. Chen, D. D. Dixon, G. Creech, P. S. Baran, *J. Am. Chem. Soc.* **2016**, *138*, 11132.
2. T. Qin, J. Cornella, C. Li, L. R. Malins, J. T. Edwards, S. Kawamura, B. D. Maxwell, M. D. Eastgate, P. S. Baran, *Science* **2016**, *352*, 801.
3. a) J. T. Edwards, R. R. Merchant, K. S. McClymont, K. W. Knouse, T. Qin, L. R. Malins, B. Vokits, S. A. Shaw, D.-H. Bao, F.-L. Wei, T. Zhou, M. D. Eastgate, P. S. Baran, *Nature* **2017**, *545*, 213; b) J. M. Smith, T. Qin, R. R. Merchant, J. T. Edwards, L. R. Malins, Z. Liu, G. Che, Z. Shen, S. A. Shaw, M. D. Eastgate, P. S. Baran, *Angew. Chem. Int. Ed.* **2017**, *56*, 11906.
4. a) For imine synthesis, and *p*-tolyl sulfinimine characterization data, please see: S. Morales, F. G. Guijarro, J. L. García Ruano, M. B. Cid, *J. Am. Chem. Soc.* **2014**, *136*, 1082; b) For *tert*-butyl sulfinimine synthesis, please see: H. Dai, X. Liu, *Org. Lett.* **2007**, *9*, 3077.
5. H. Kataoka, T. Ohe, K. Takahashi, S. Nakamura, T. Mashino, *Bioorg. Med. Chem. Lett.* **2016**, *26*, 4565.
6. A. D. Tereshchenko, J. S. Myronchuk, L. D. Leitchenko, I. V. Knysh, G. O. Tokmakova, O. O. Litsis, A. Tolmachev, K. Liubchak, P. Mykhailiuk, *Tetrahedron* **2017**, *73*, 750.
7. H. Gao, A. R. Renslo, *J. Org. Chem.* **2007**, *72*, 8591.
8. H. Hoveyda, E. Marsault, H. Thomas, G. Fraser, S. Beaubien, A. Mathieu, J. Beignet, M.-A. Bonin, S. Phoenix, D. Drutz, M. Peterson, S. Beauchemin, M. Brassard, M. Vézina (Tranzyme Pharma, Inc), WO2011053821A1, **2009**.
9. A. Esposito, P. P. Piras, D. Ramazzotti, M. Taddei, *Org. Lett.* **2001**, *3*, 3273.
10. K. Curry, H. Pajouhesh, WO1999054280B1, **1998**.
11. ; a) J. J. Cottell, J. O. Link, S. D. Schroeder, J. Taylor, W. C. Tse, R. W. Vivian,

- Z.-Y. Yang (Gilead Sciences, Inc.), WO2009005677A2, **2007**; b) H. Hong, C. Zheng, L. Guo (Asymchem Laboratories Co., Ltd.), WO2013167088, **2013**.
12. E. Langkopf, A. Pautsch, C. Schoelch, A. Schuler-Metz, R. Streicher, H. Wagner (Boehringer Ingelheim International GmbH), US8163911B2, **2007**.
13. L. Tong, W. Yu, J. A. Kozlowski, L. Chen, O. Selyutin, S. H. Kim, M. Dwyer, B. Hu, B. Zhong, D. Wai, J. Hao, C. Shen, Z. Lei, W. Wang (Merck Sharp & Dohme Corp.), WO2014110706A1, **2013**.
14. a) N. R. Treweeke, P. B. Hitchcock, D. A. Pardoe, S. Caddick, *Chem. Commun.* **2005**, 1868; b) M. Pellach, S. Mondal, L. J. W. Shimon, L. Adler-Abramovich, L. Buzhansky, E. Gazi, *Chem. Mater.* **2016**, *28*, 4341.
15. a) P. Dauban, C. de Saint-Fuscien, F. Acher, L. Prézeau, I. Brabet, J.-P. Pin, R. H. Dodd, *Bioorg. Med. Chem. Lett.* **2000**, *10*, 129; b) M. Oba, S. Koguchi, K. Nishiyama, *Tetrahedron Lett.* **2001**, *42*, 5901; c) M. Oba, S. Koguchi, K. Nishiyama, *Tetrahedron* **2002**, *58*, 9359; d) M. Oba, N. Nishiyama, K. Nishiyama, *Chem. Commun.* **2003**, 776; e) M. Oba, S. Koguchi, K. Nishiyama, *Tetrahedron* **2004**, *60*, 8089.
16. a) J. Bouchaudon, G. Dutruc-Rosset, D. Farge, C. James, *J. Chem. Soc. Perkin Trans. 1* **1989**, 695; b) G. Bold, T. Allmendinger, P. Herold, L. Moesch, H.-P. Schär, R. O. Duthaler, *Helv. Chim. Acta*, **1992**, *75*, 865; c) F. A. Davis, V. Srirajan, *J. Org. Chem.* **2000**, *65*, 3248; d) F. Paradisi, G. Porzi, S. Rinaldi, S. Sandri, *Tetrahedron: Asymmetry* **2000**, *11*, 1259; e) C. M. Diaper, A. Sutherland, B. Pillai, M. N. G. James, P. Semchuk, J. S. Blanchard, J. C. Vederas, *Org. Biomol. Chem.* **2005**, *3*, 4402; f) M. Hasegawa, A. Kawasaki, K. Yang, Y. Fujimoto, J. Masumoto, E. Breukink, G. Nuñez, K. Fukase, N. Inohara, *J. Biol. Chem.* **2007**, *282*, 11757; g) J. Wang, H. Liu, J. L. Aceña, D. Houck, R. Takeda, H. Moriwaki, T. Sato, V. A. Soloshonok, *Org. Biomol. Chem.* **2013**, *11*, 4508; h) Q. Wang, Y. Matsuo, A. R. Pradipta, N. Inohara, Y. Fujimoto, K. Fukase, *Org. Biomol. Chem.* **2016**, *14*, 1013.

17. D. Bandak, O. Babii, R. Vasiuta, I. V. Komarov, P. K. Mykhailiuk, *Org. Lett.* **2015**, *17*, 226.
18. a) R. Pellicciari, M. Raimondo, M. Marinozzi, B. Natalini, G. Costantino, C. Thomsen, *J. Med. Chem.* **1996**, *39*, 2874; b) G. Costantino, K. Maltoni, M. Marinozzi, E. Camaioni, L. Prezeau, J.-P. Pin, R. Pellicciari, *Bioorg. Med. Chem.* **2001**, *9*, 221; c) P. K. Mykhailiuk, S. Afonin, A. N. Chernega, E. B. Rusanov, M. O. Platonov, G. G. Dubinina, M. Berditsch, A. S. Ulrich, I. V. Komarov, *Angew. Chem. Int. Ed.* **2006**, *45*, 5659; d) R. Filosa, M. Marinozzi, G. Costantino, M. B. Hermit, C. Thomsen, R. Pellicciari, *Bioorg. Med. Chem.* **2006**, *14*, 3811; e) S. Pritz, M. Pätz, G. Szeimies, M. Dathe, M. Bienert, *Org. Biomol. Chem.* **2007**, *5*, 1789; f) R. Filosa, M. C. Fulco, M. Marinozzi, N. Giacchè, A. Macchiarulo, A. Peduto, A. Massa, P. de Caprariis, C. Thomsen, C. T. Christoffersen, R. Pellicciari, *Bioorg. Med. Chem.* **2009**, *17*, 242; g) P. K. Mykhailiuk, N. M. Voievoda, S. Afonin, A. S. Ulrich, I. V. Komarov, *J. Fluorine Chem.* **2010**, *131*, 217; h) S. O. Kokhan, A. V. Tymtsunik, S. L. Grage, S. Afonin, O. Babii, M. Berditsch, A. V. Strizhak, D. Bandak, M. O. Platonov, I. V. Komarov, A. S. Ulrich, P. K. Mykhailiuk, *Angew. Chem. Int. Ed.* **2016**, *55*, 14788.
19. A. S. Deeming, C. J. Russell, M. C. Willis, *Angew. Chem. Int. Ed.* **2015**, *54*, 1168.



## Spectra for Redox-Active Esters

### Compound SI-6 <sup>1</sup>H NMR

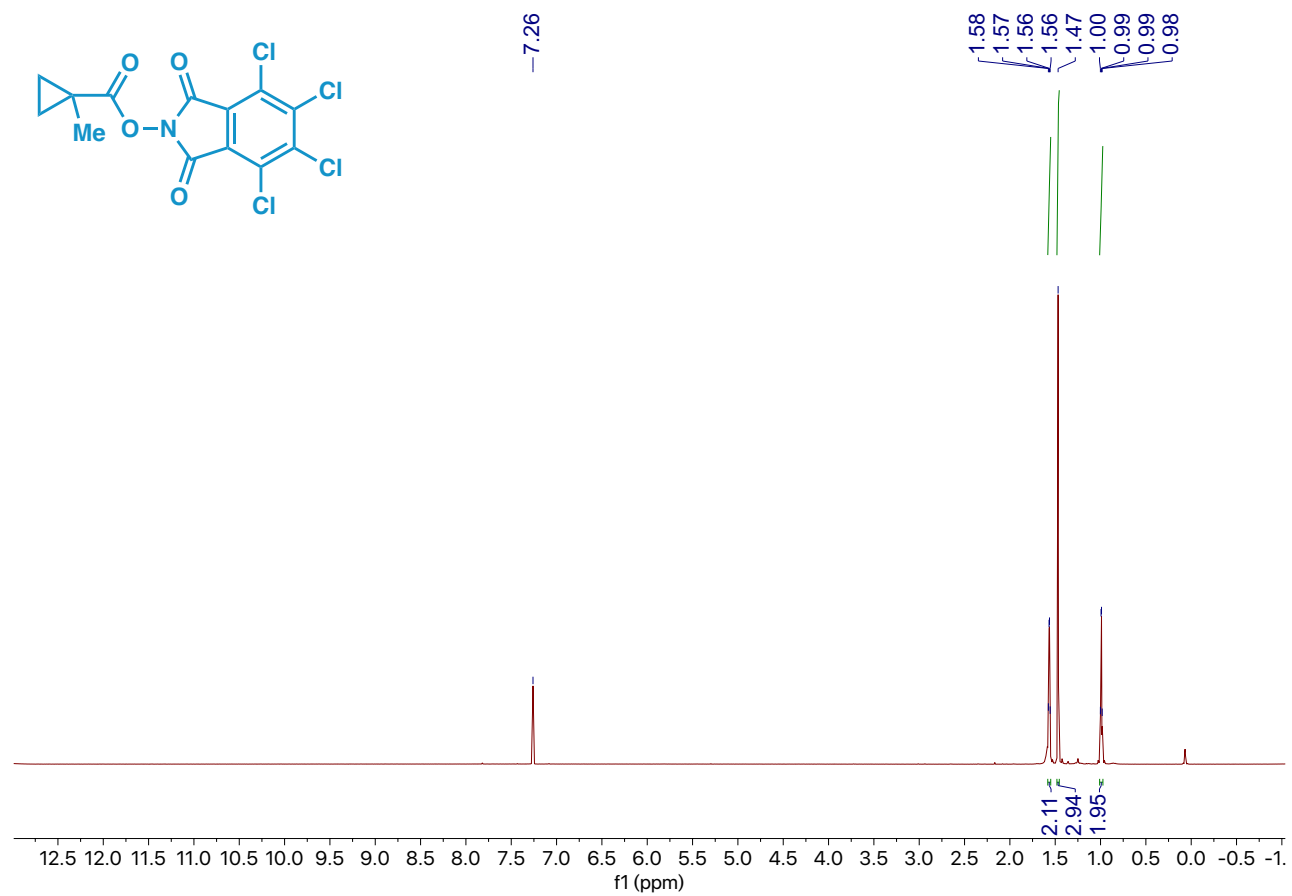

# Compound SI-6 <sup>13</sup>C NMR

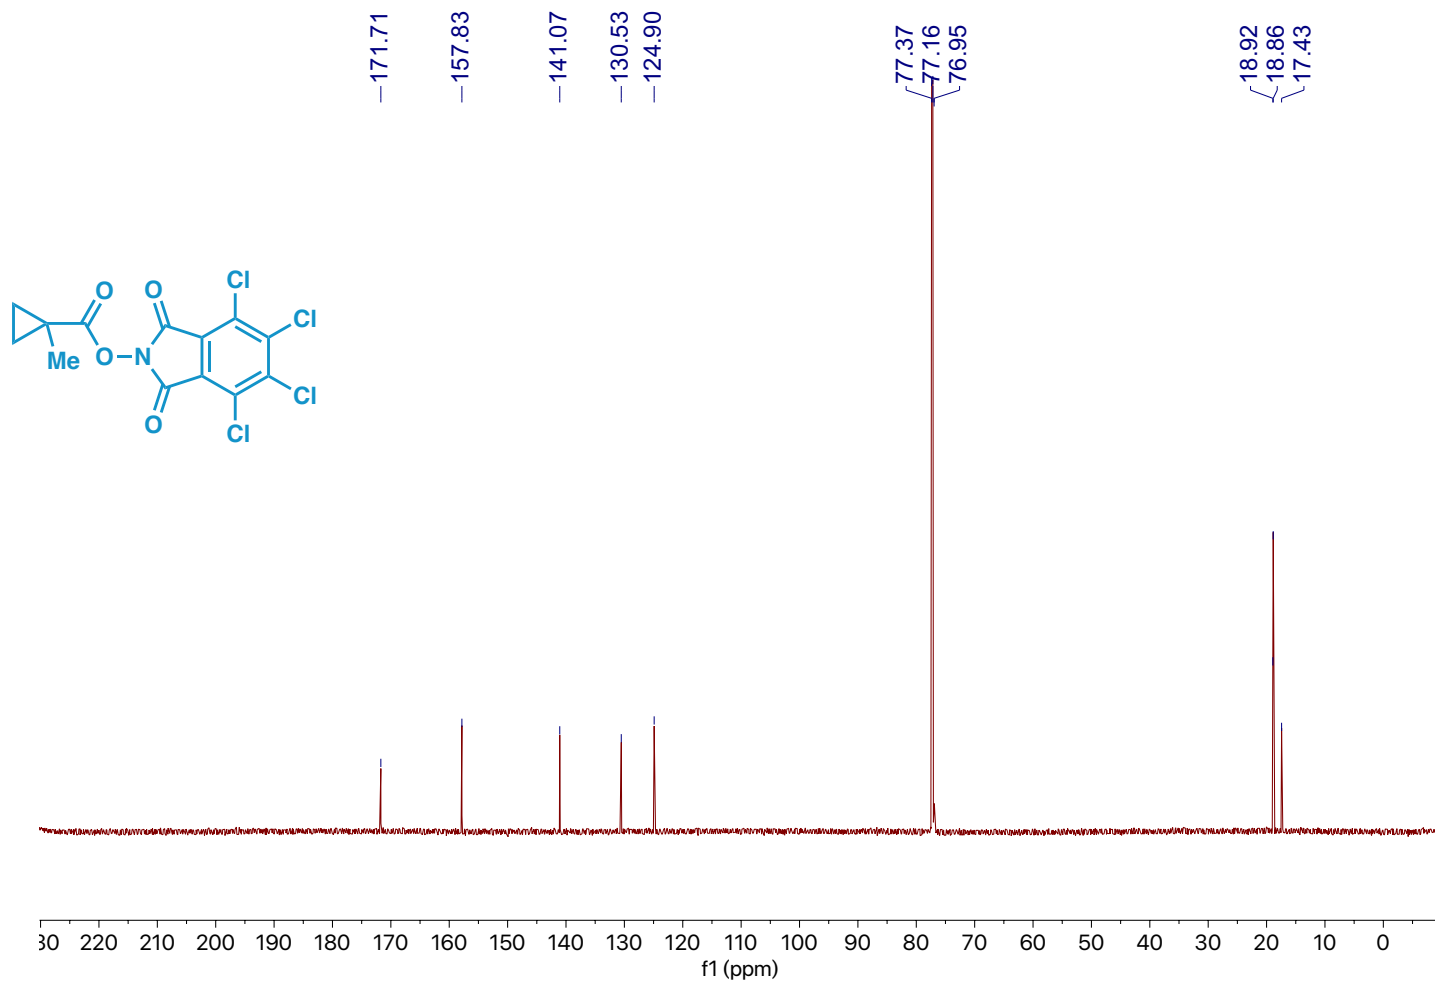

# Compound SI-7 <sup>1</sup>H NMR

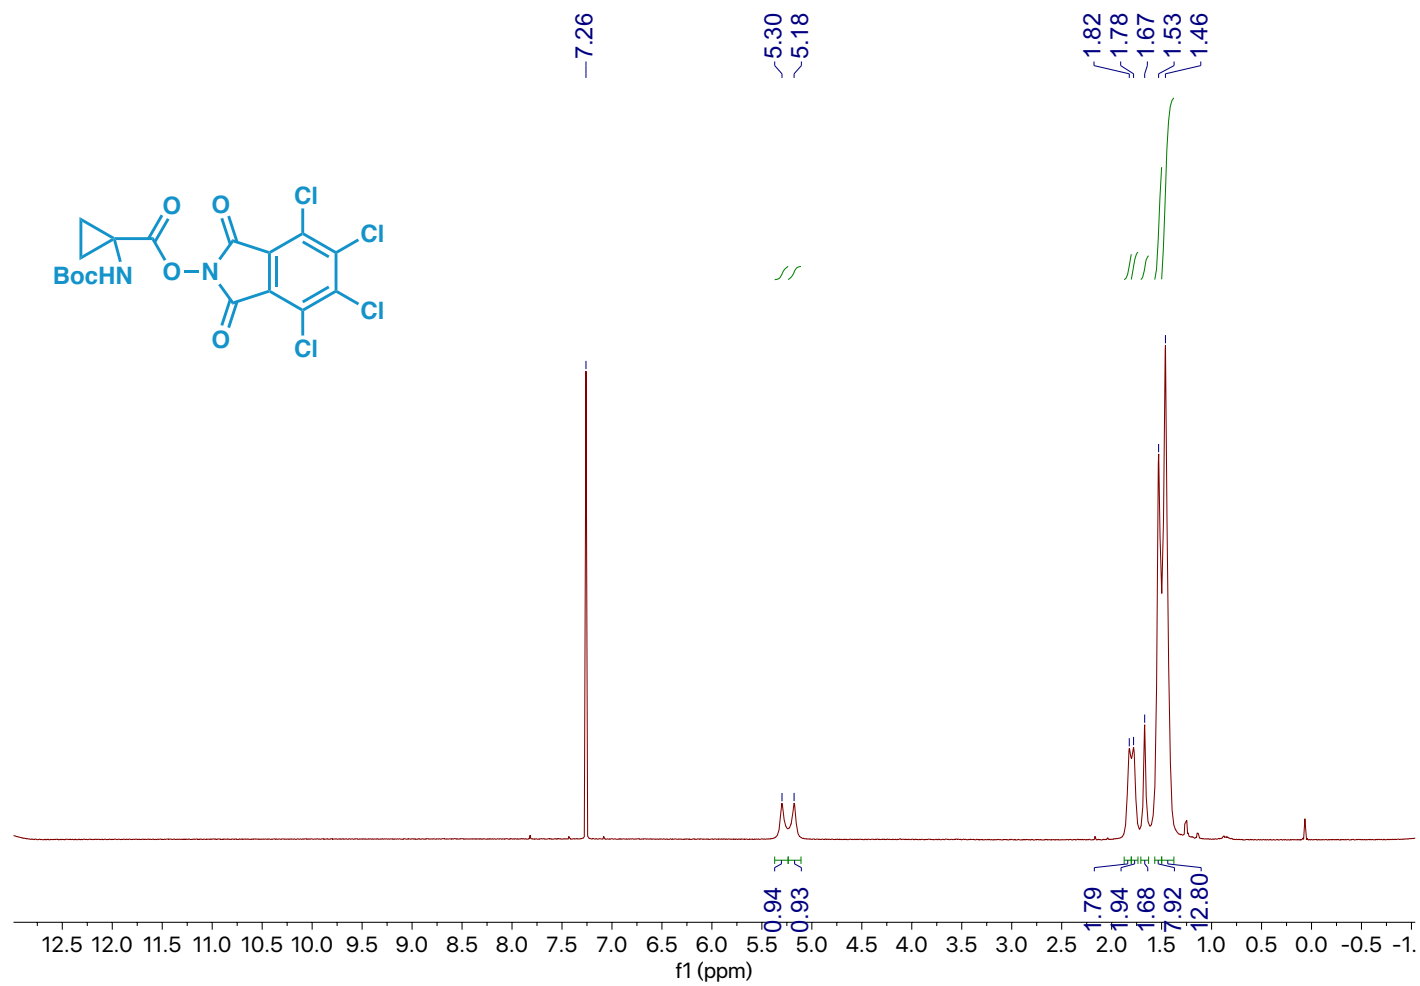

# Compound SI-7 <sup>13</sup>C NMR

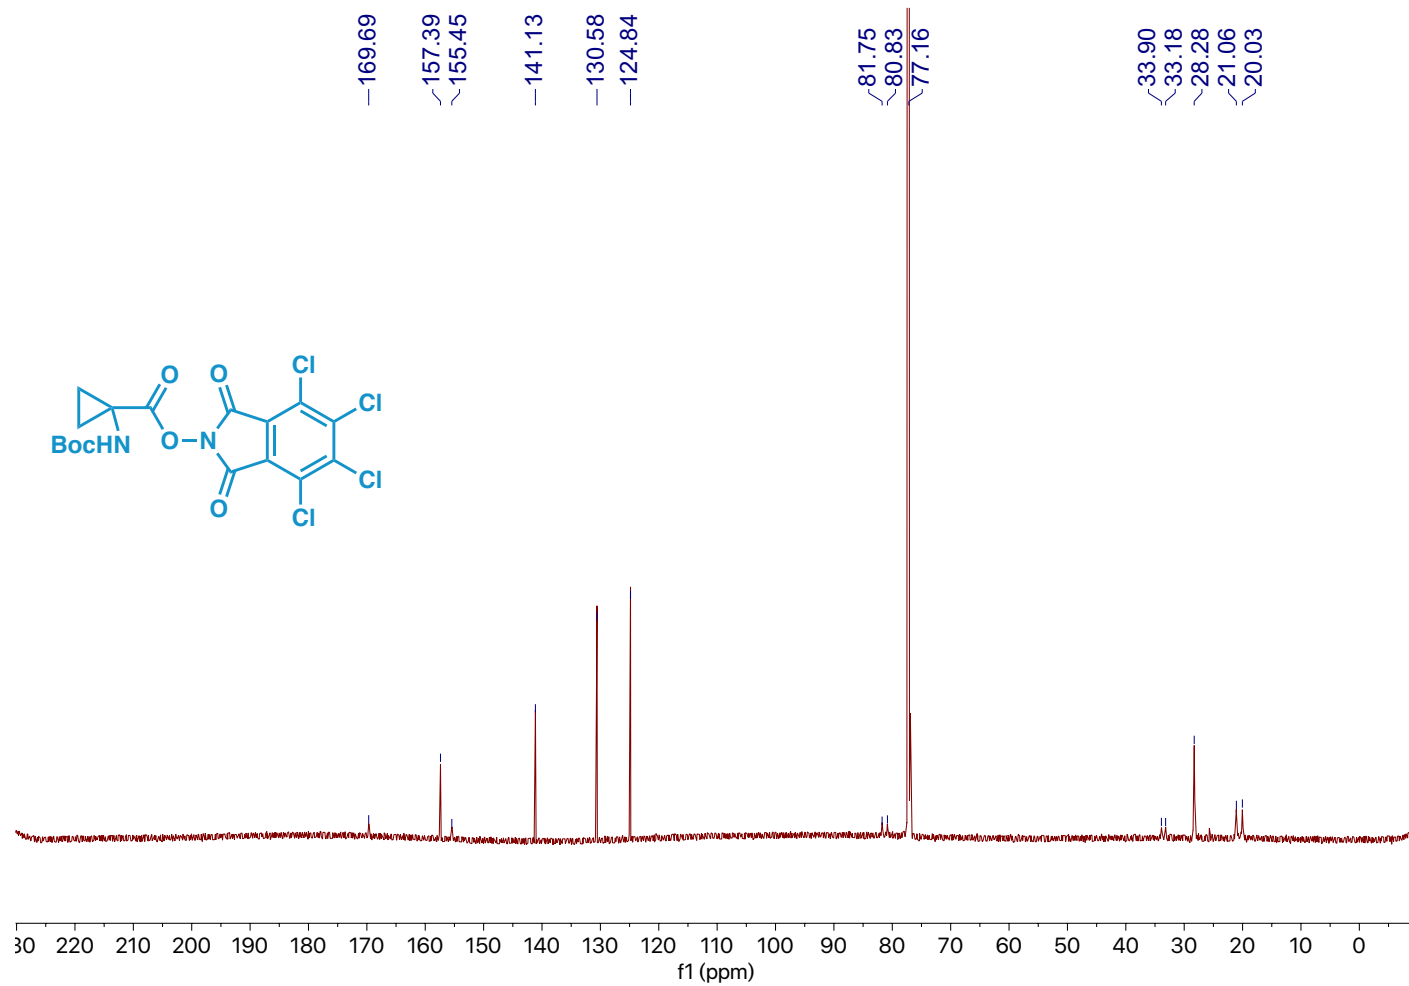

# Compound SI-8 <sup>1</sup>H NMR

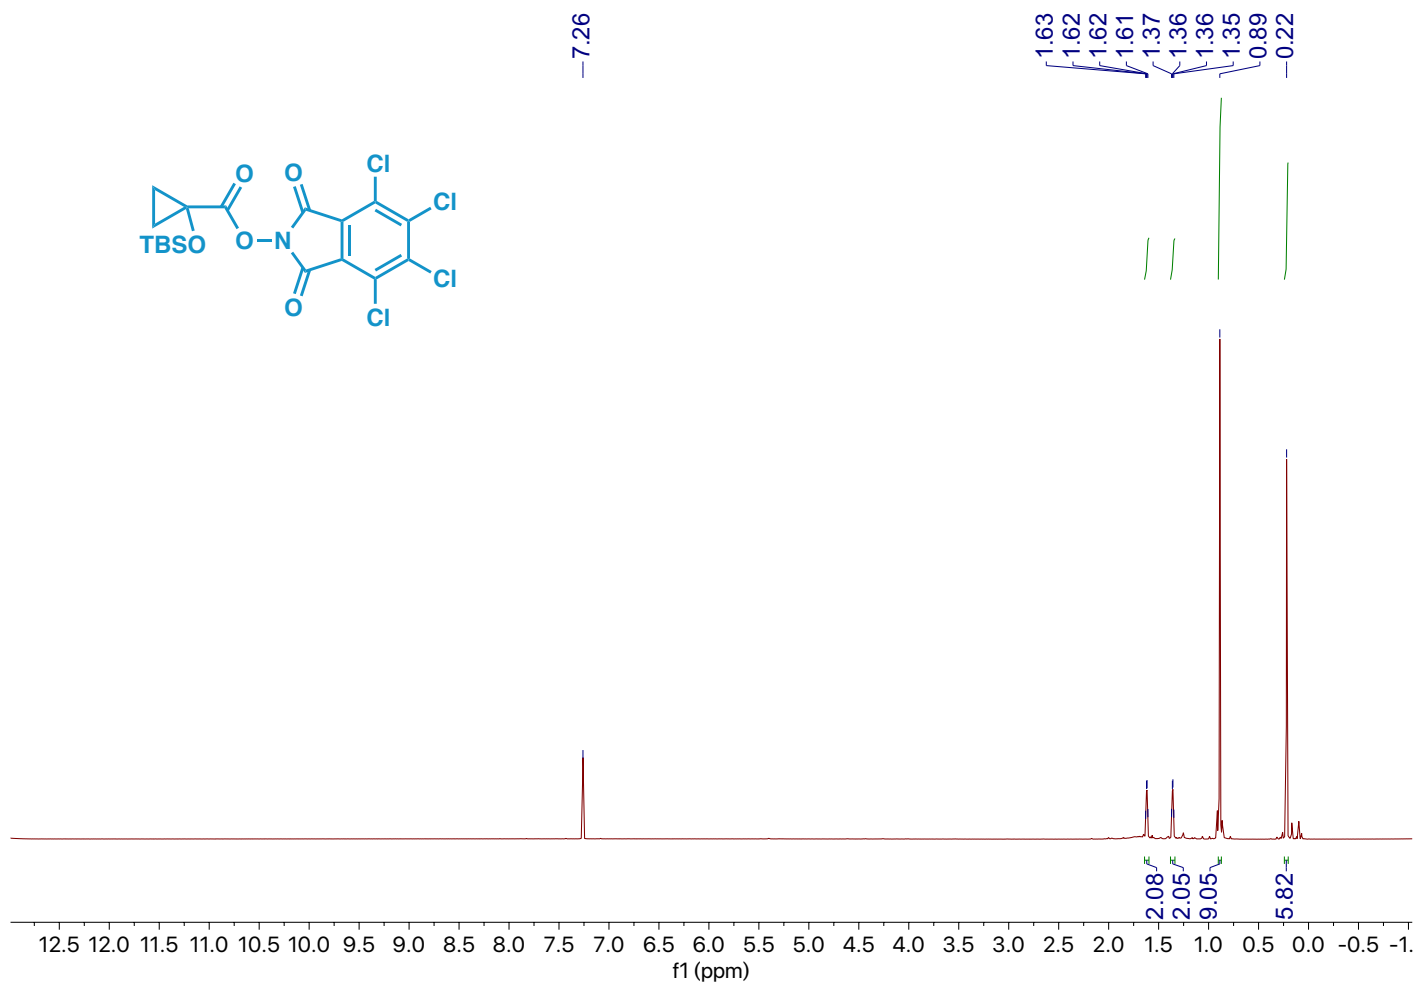

# Compound SI-8 <sup>13</sup>C NMR

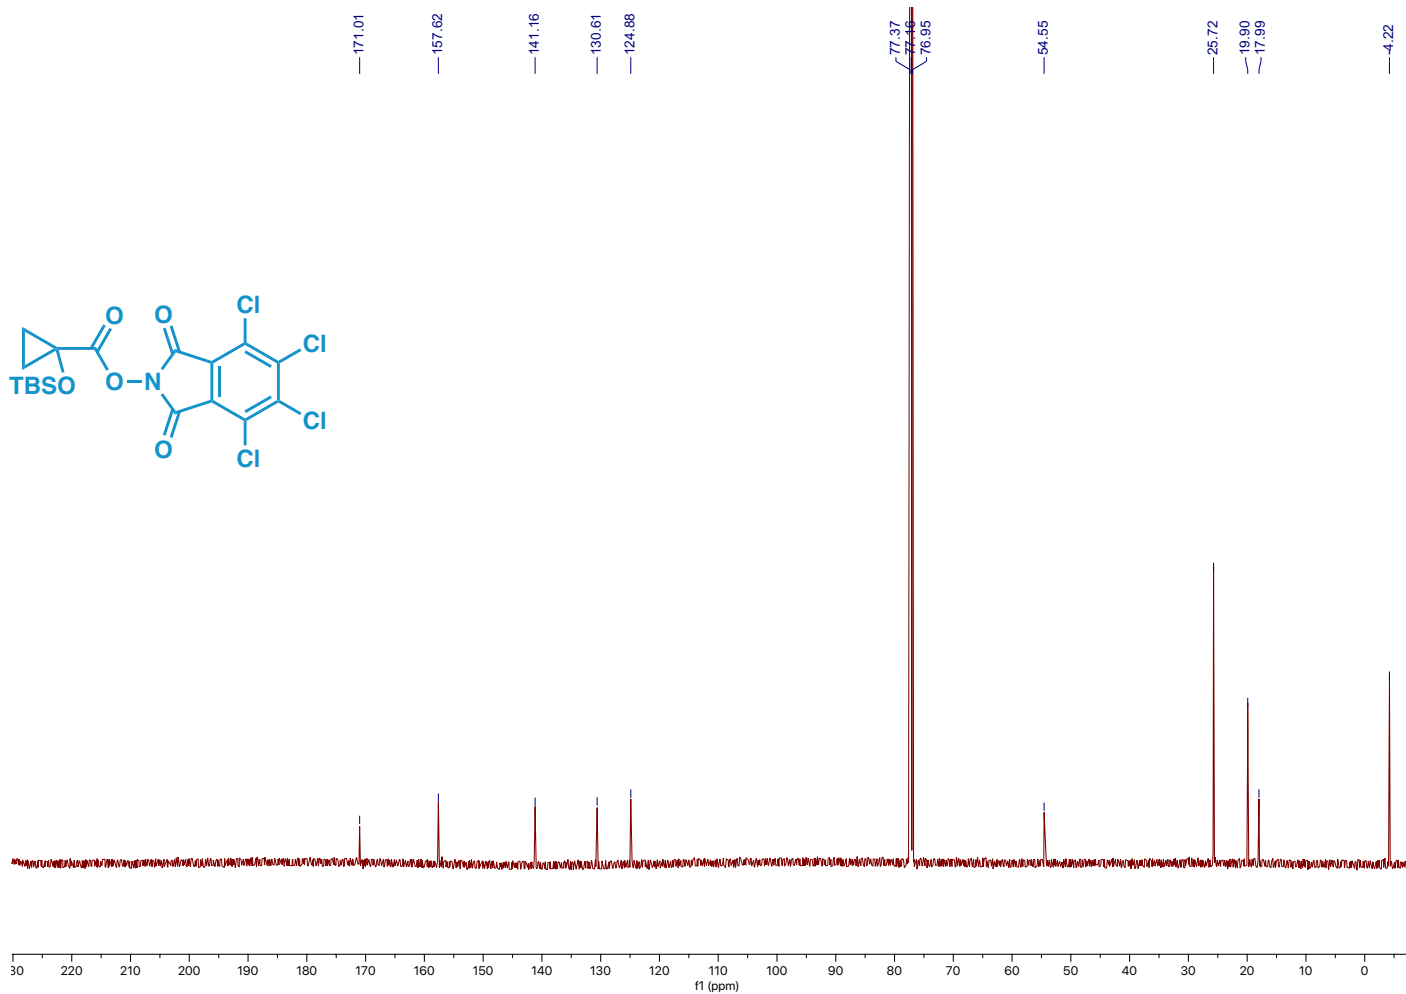

# Compound SI-9 <sup>1</sup>H NMR

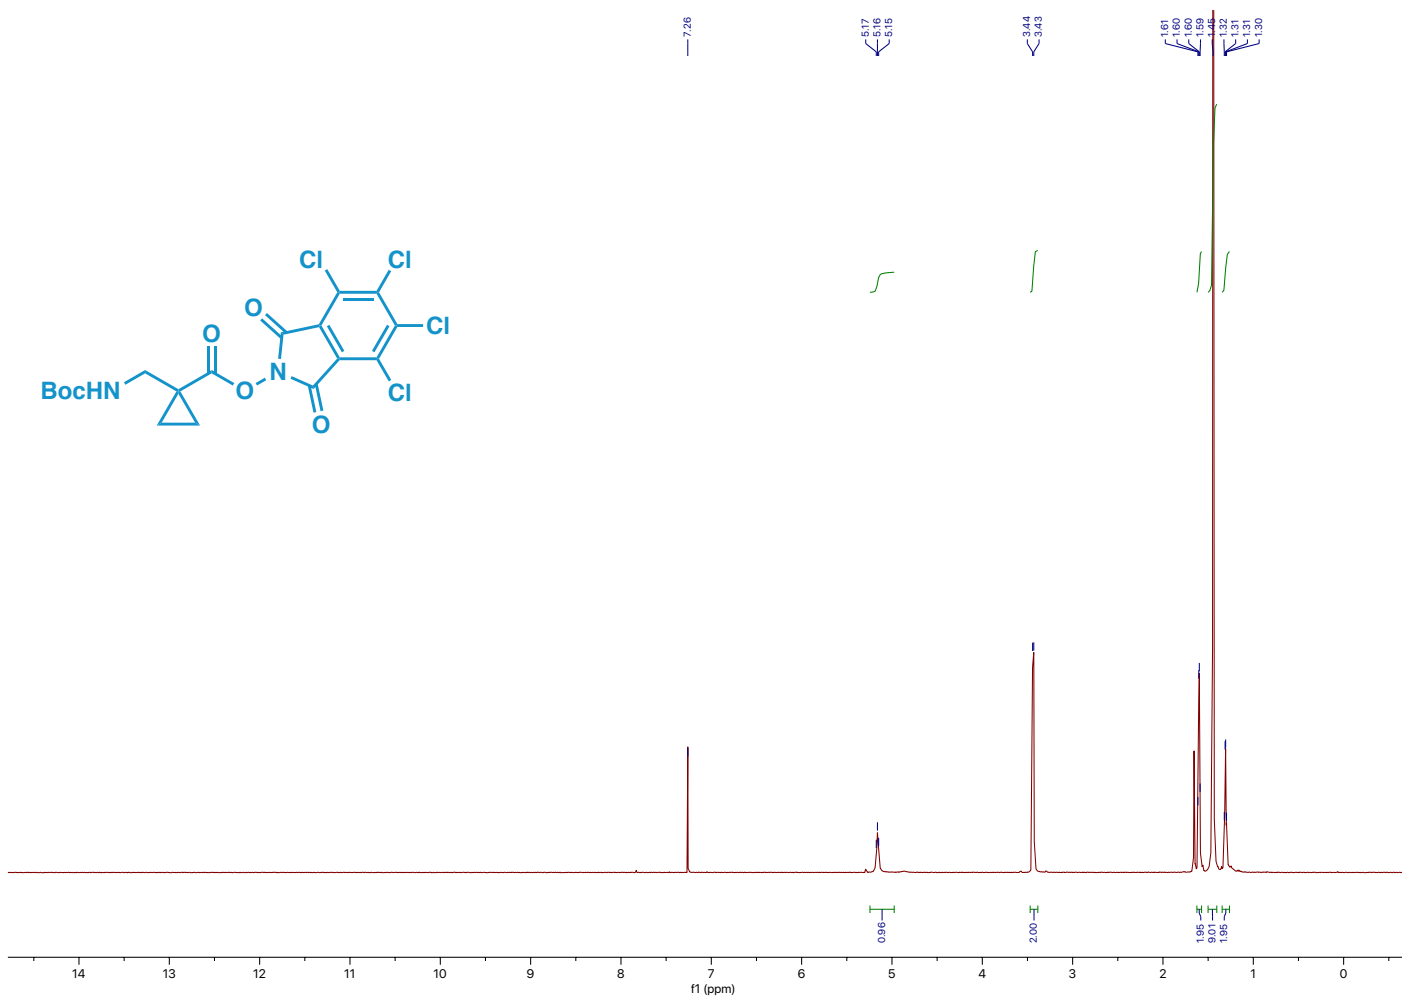

# Compound SI-9 <sup>13</sup>C NMR

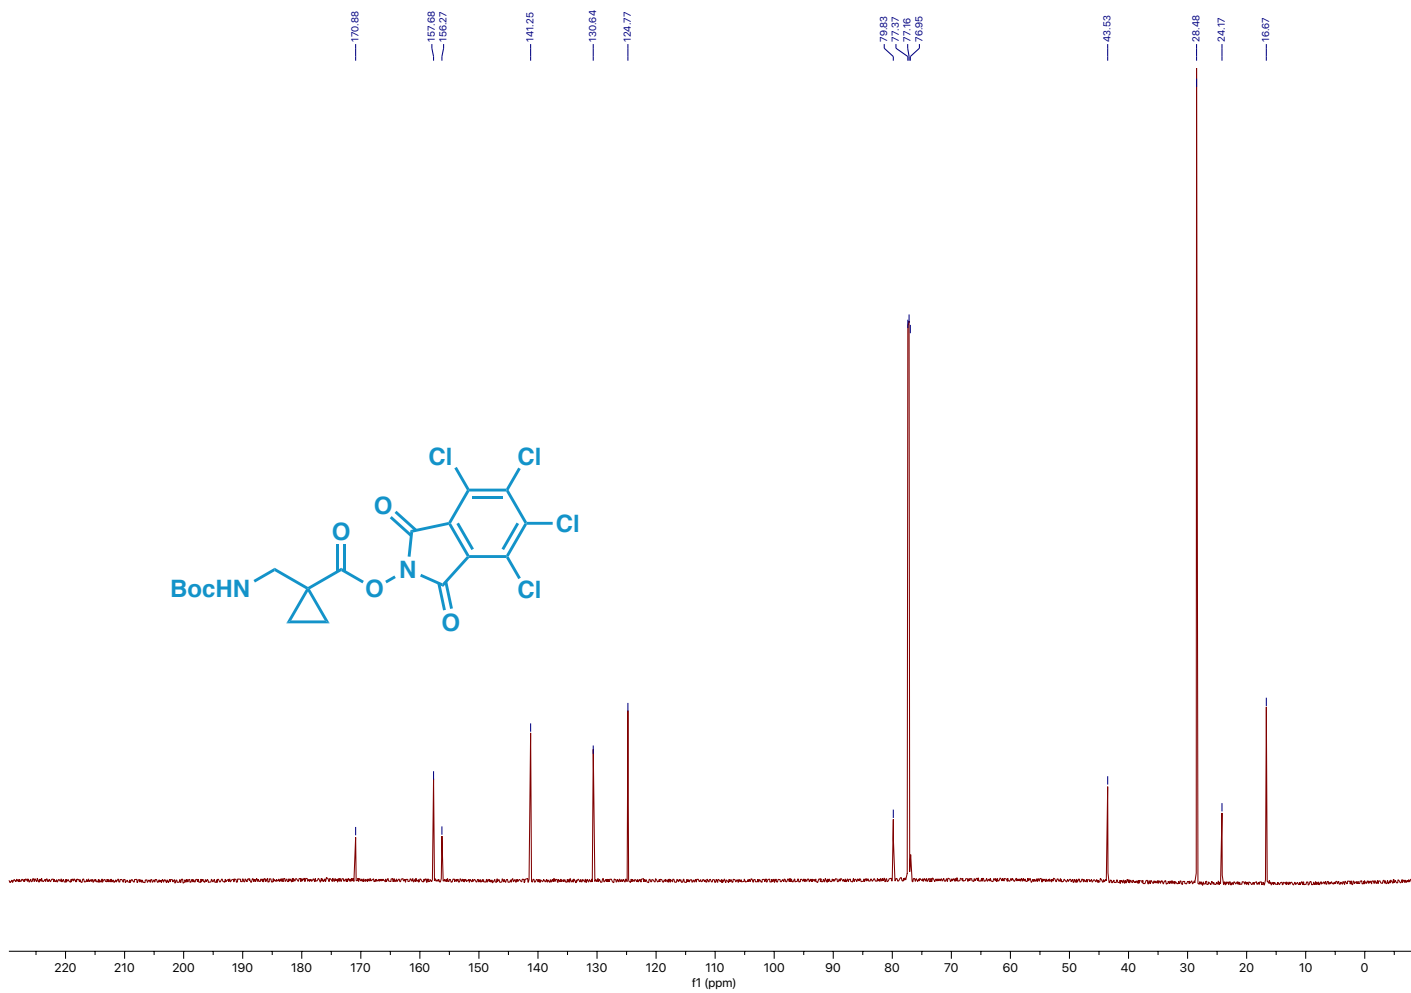



# Compound SI-10 <sup>1</sup>H NMR

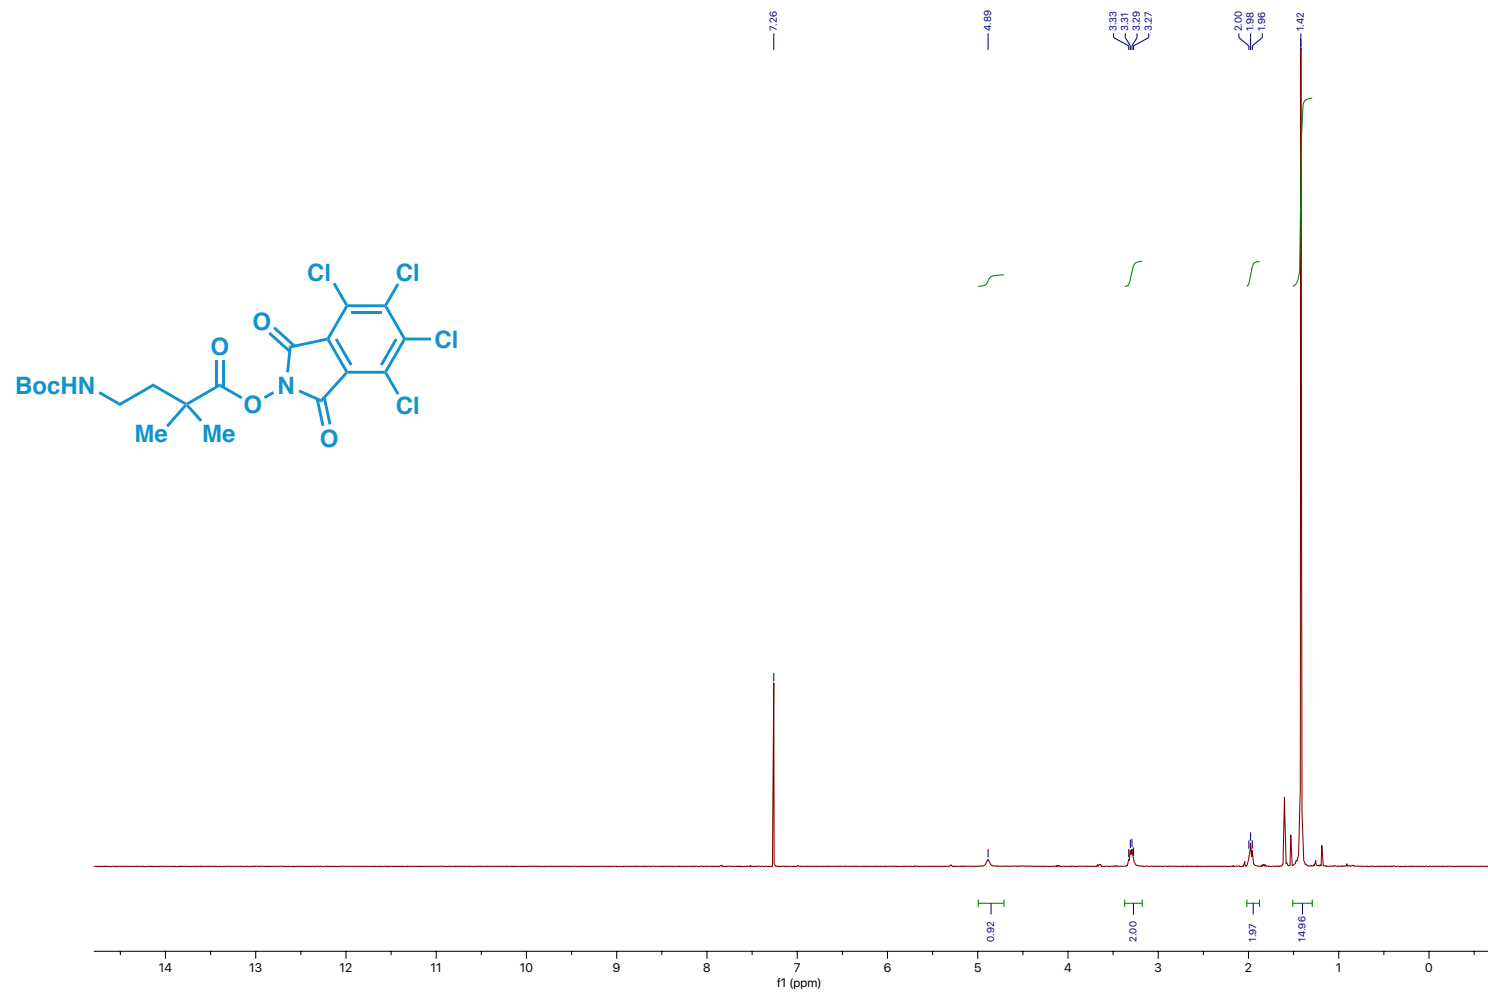

# Compound SI-10 <sup>13</sup>C NMR

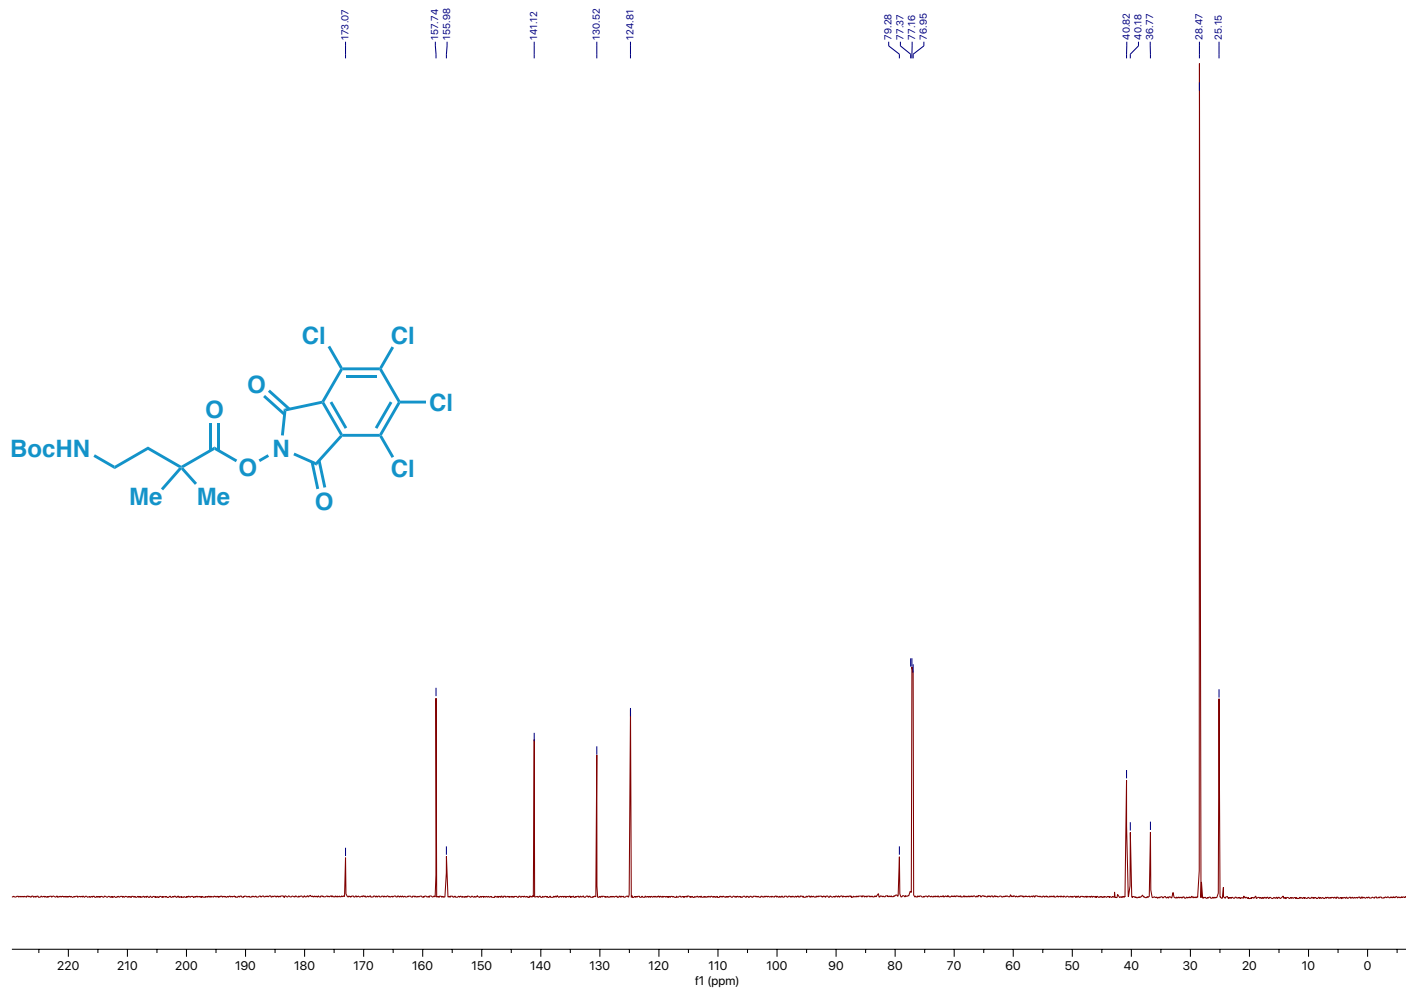

# Compound SI-11 <sup>1</sup>H NMR

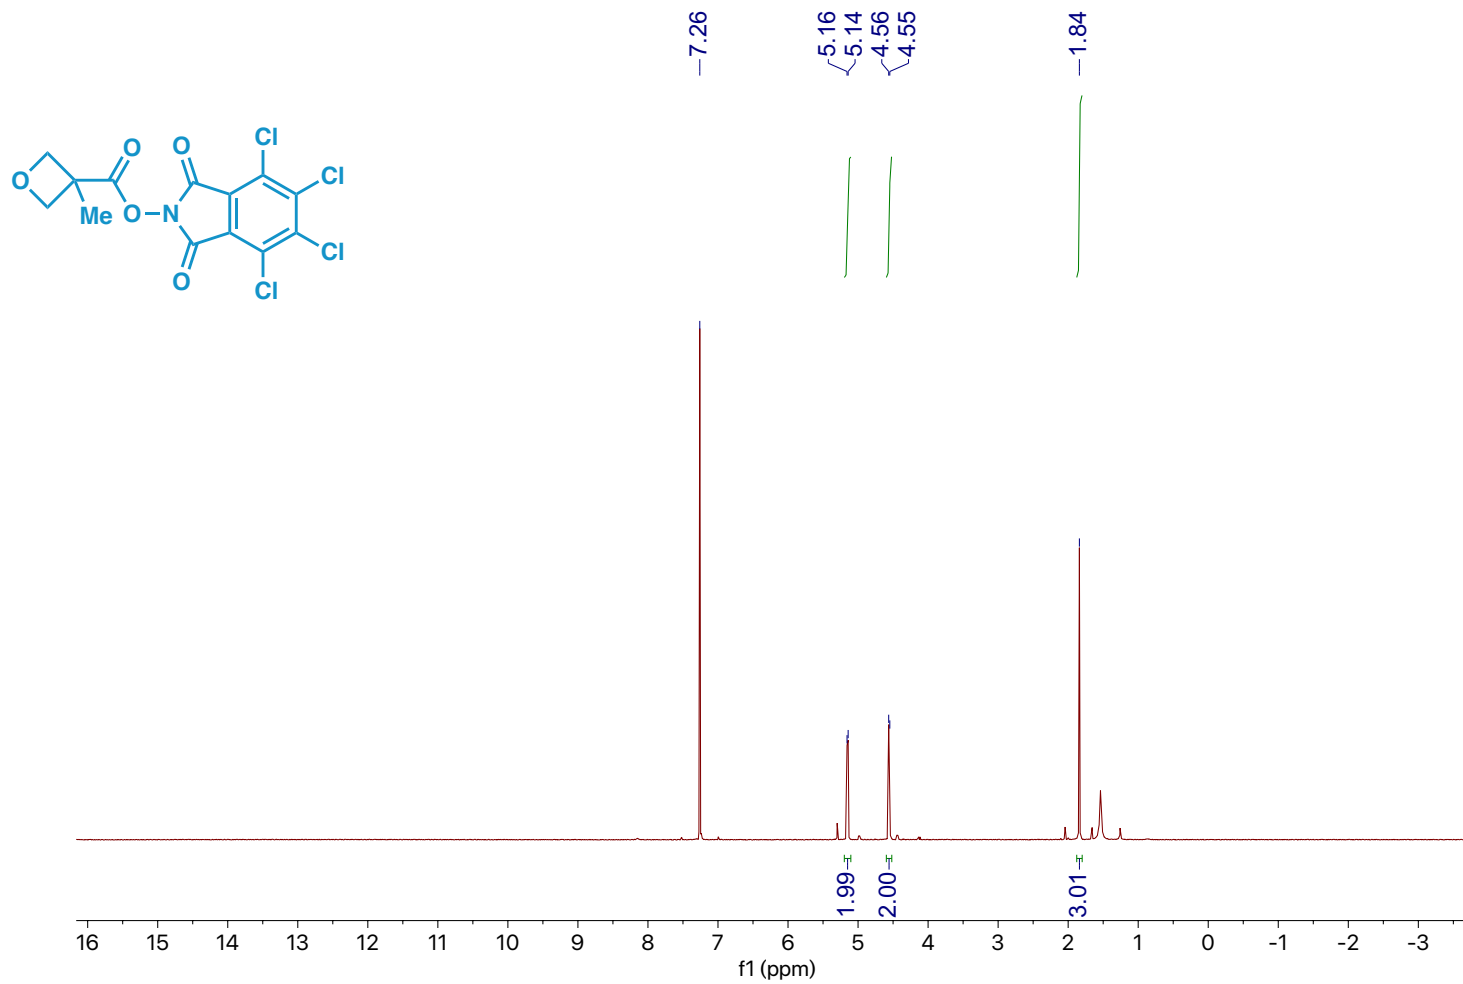

# Compound SI-11 <sup>13</sup>C NMR

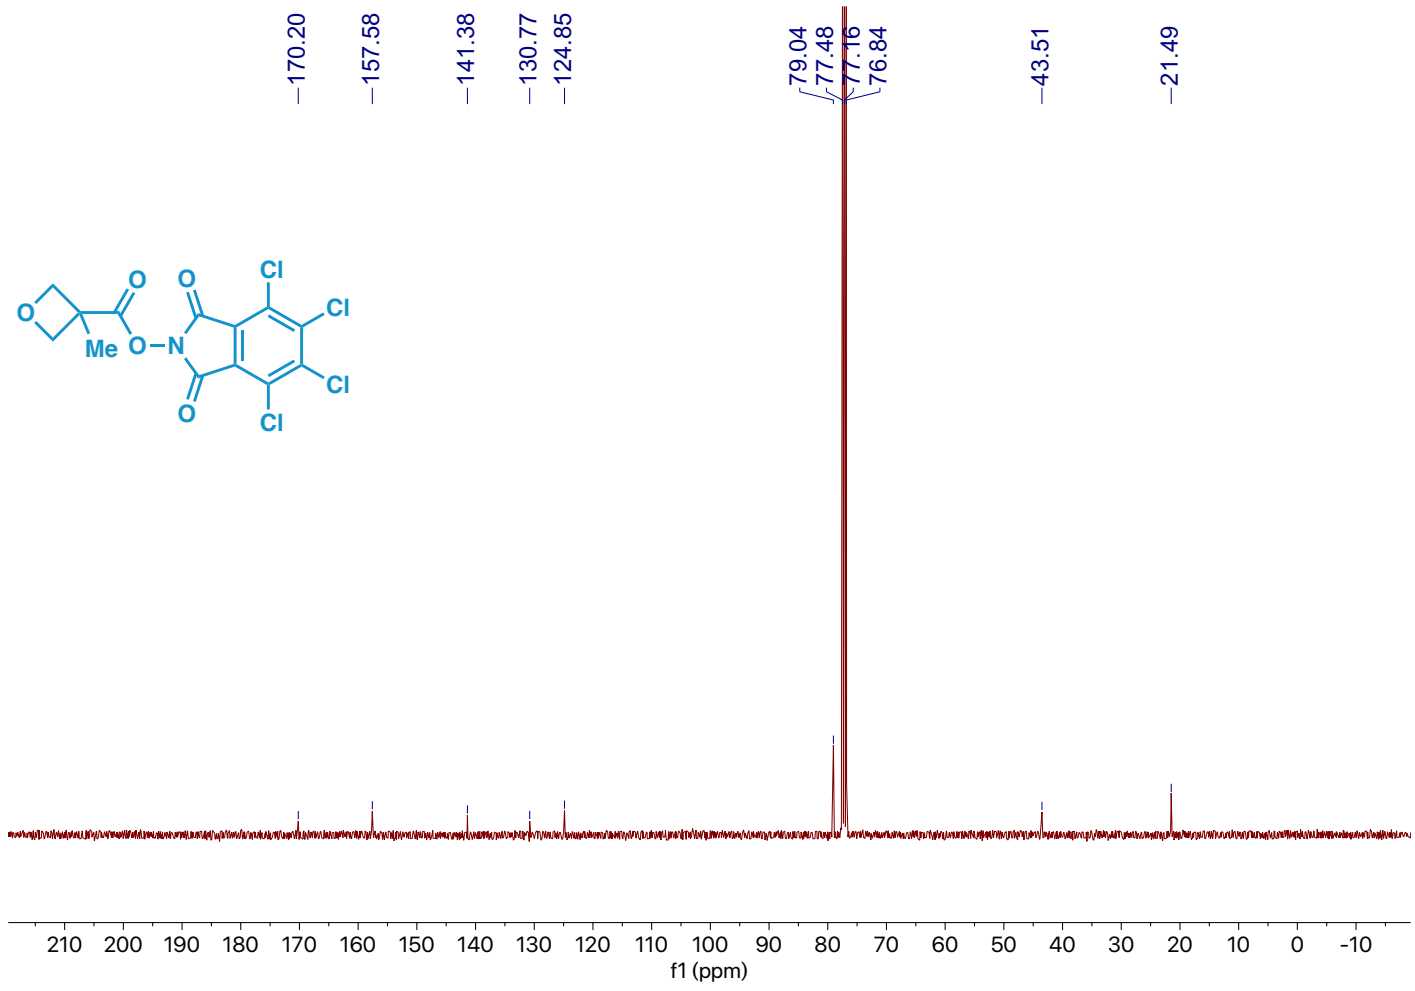

# Compound SI-12 <sup>1</sup>H NMR

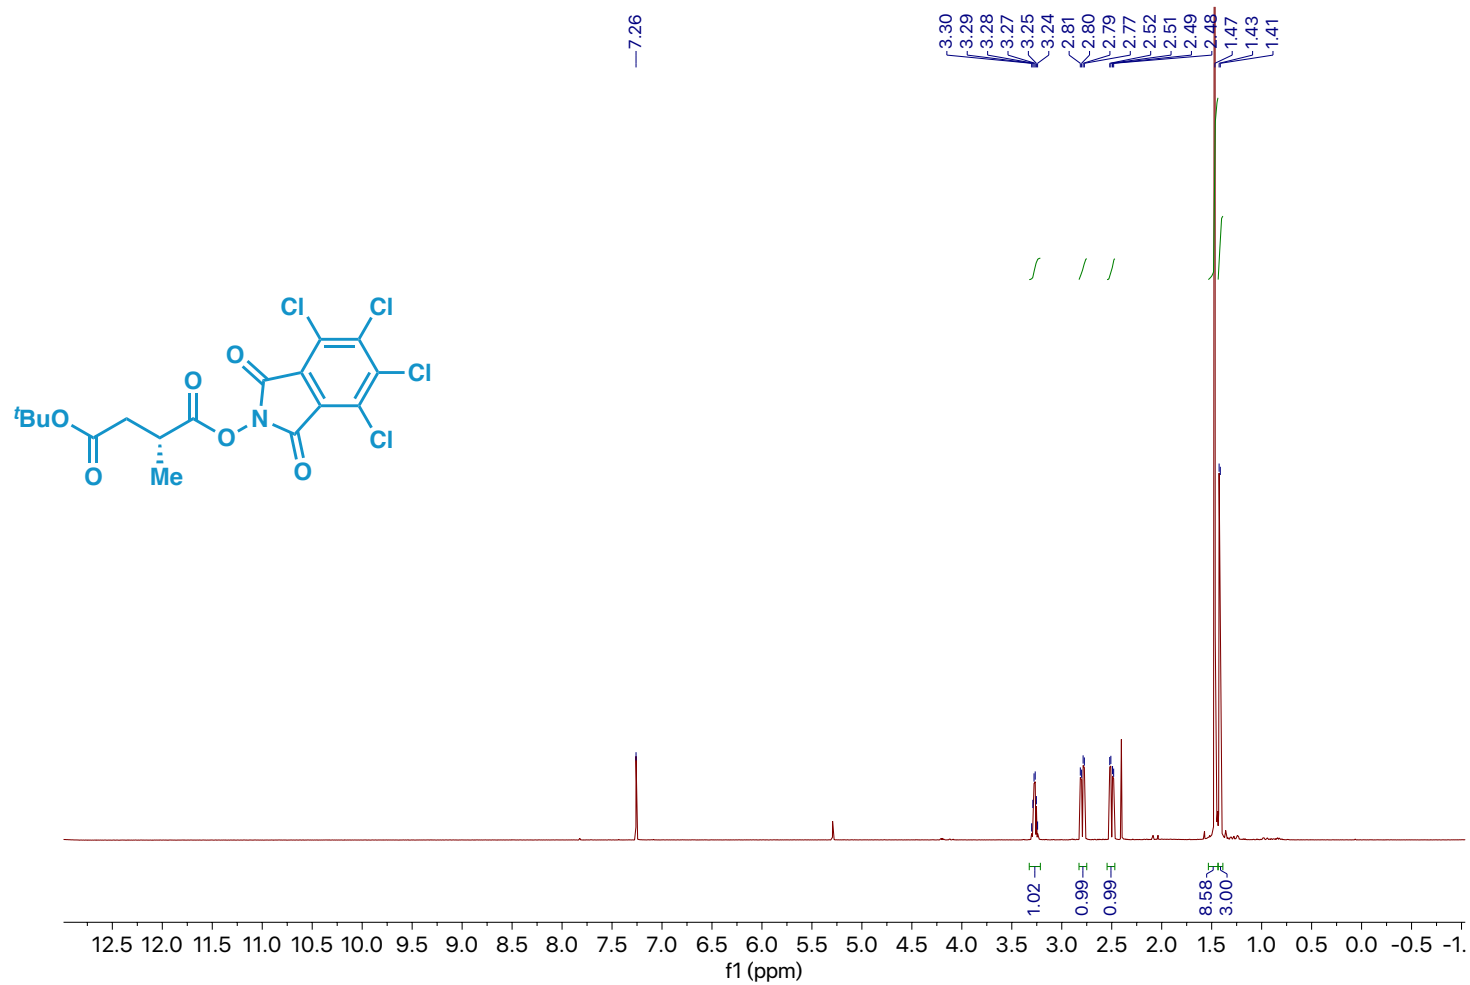

# Compound SI-12 <sup>13</sup>C NMR

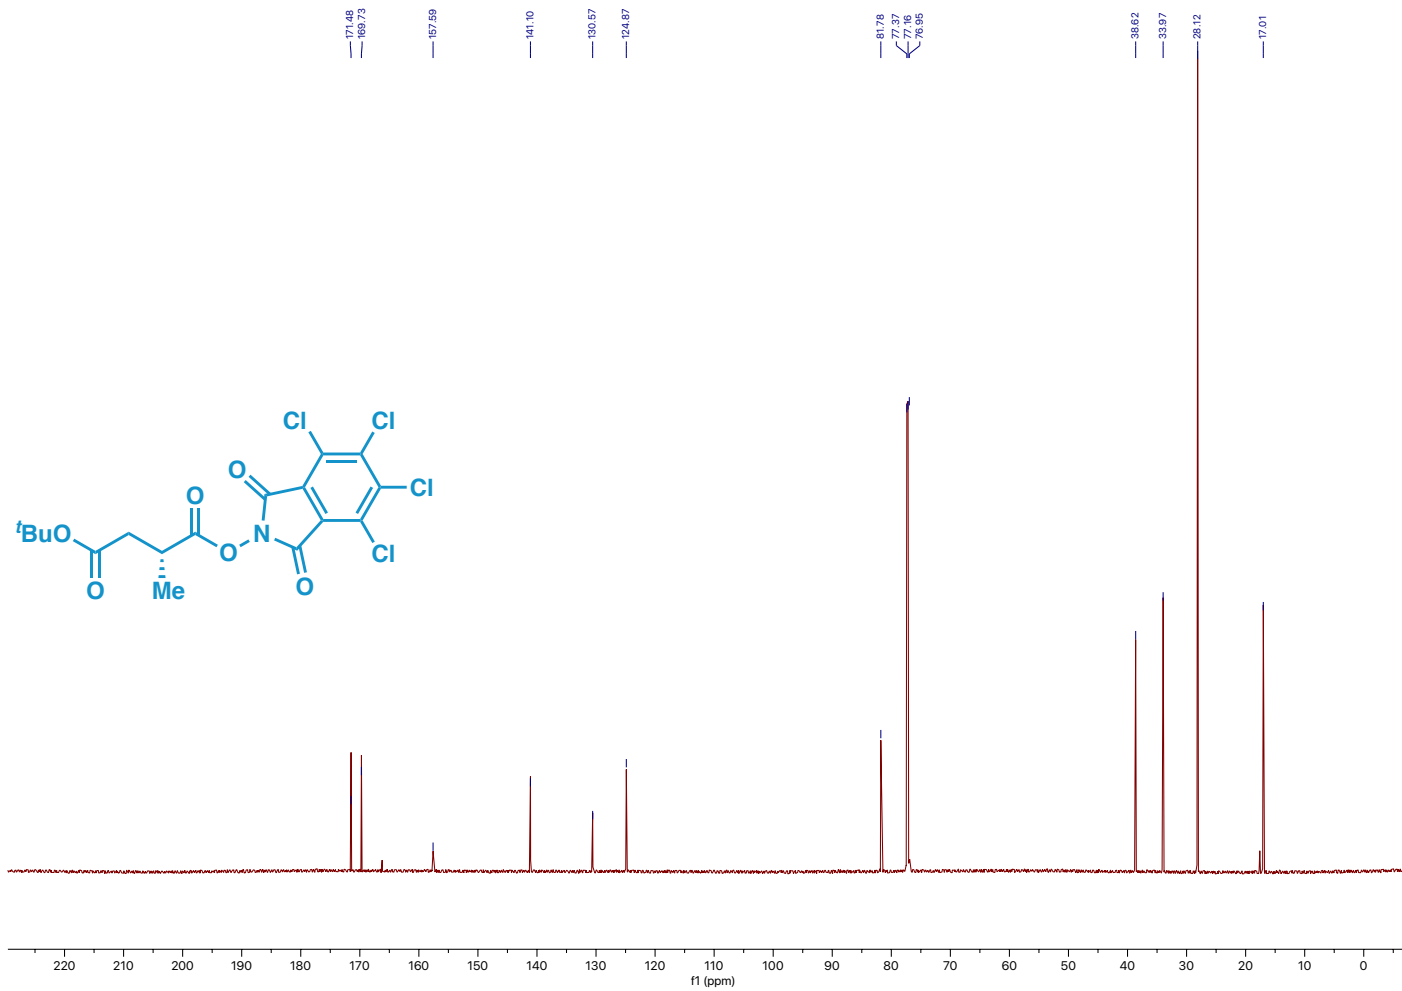

# Compound SI-13 <sup>1</sup>H NMR

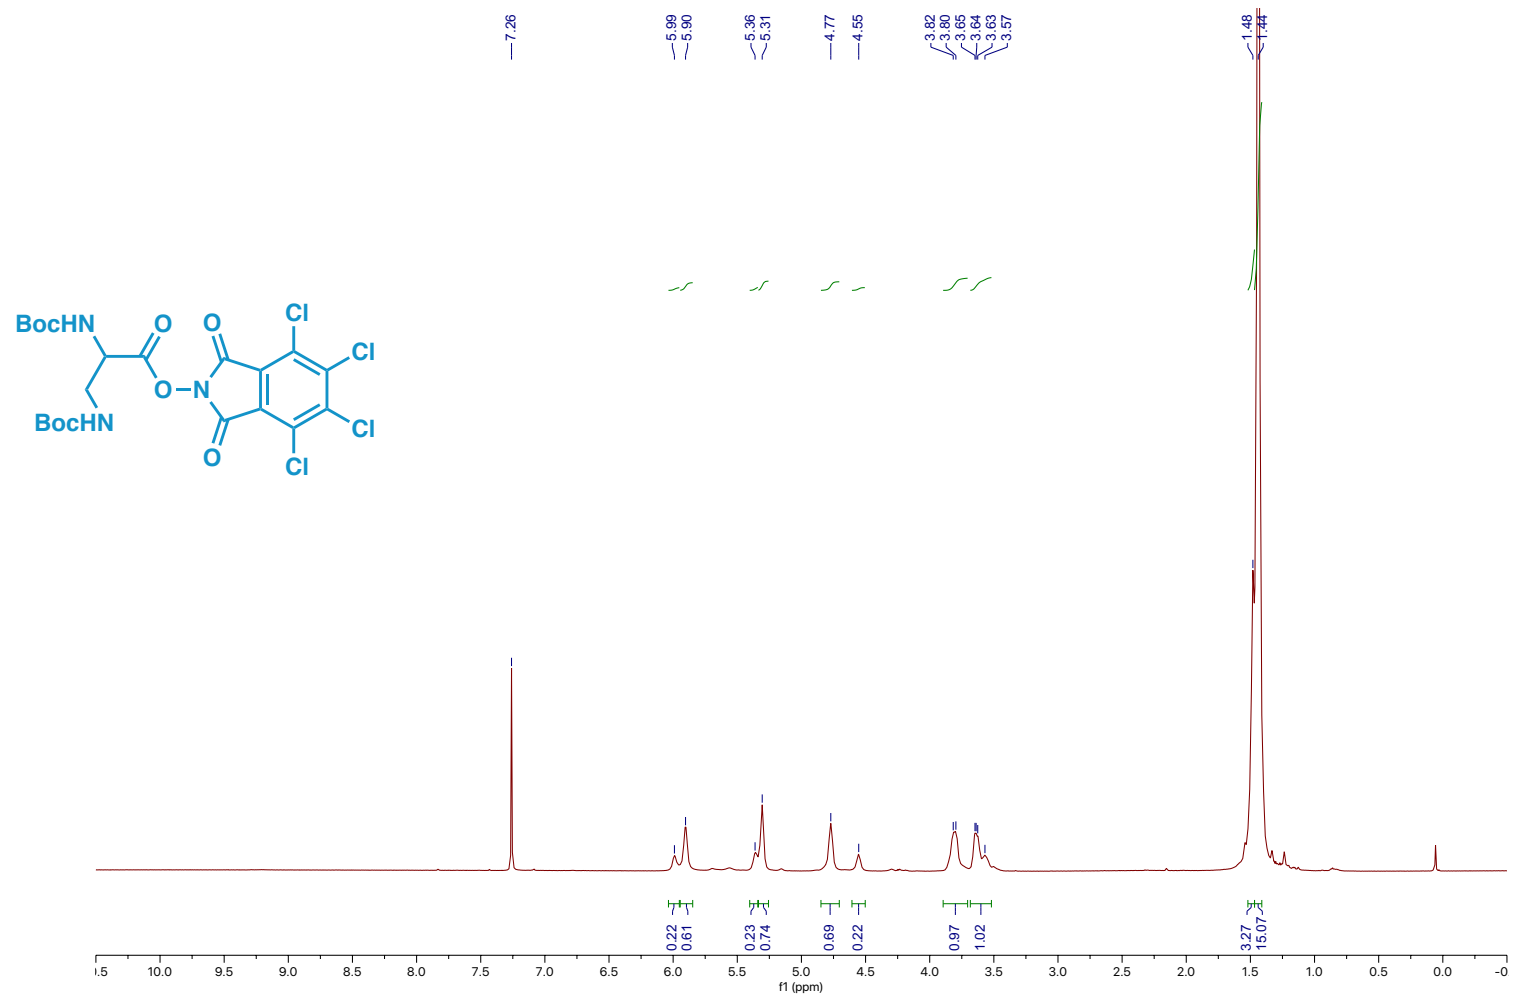

# Compound SI-13 <sup>13</sup>C NMR

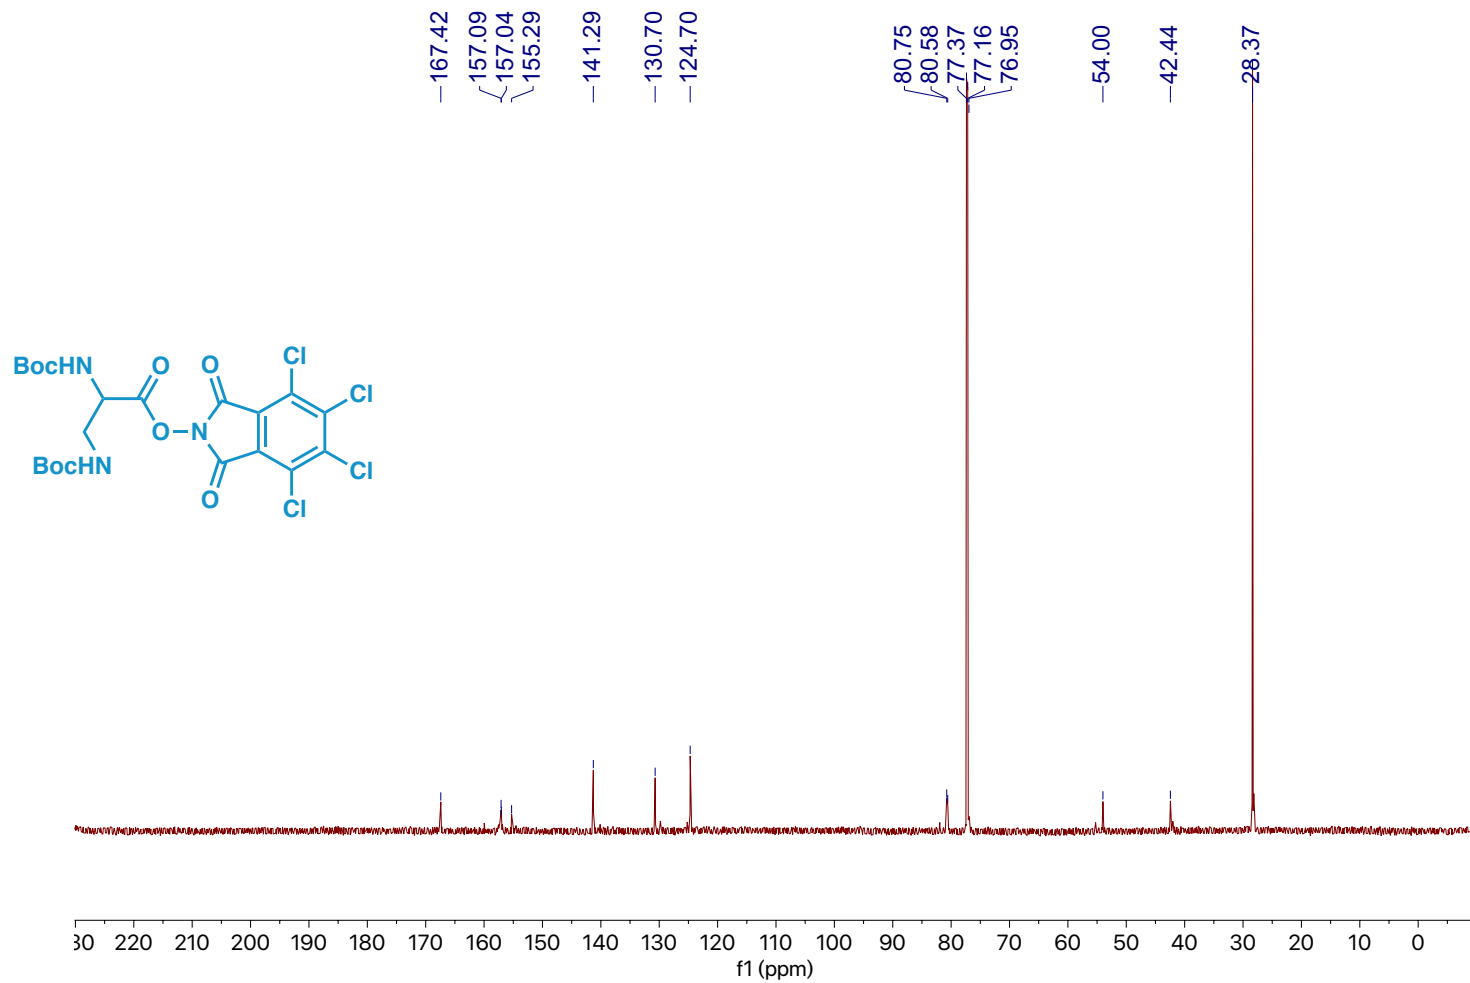



# Compound SI-14 <sup>1</sup>H NMR

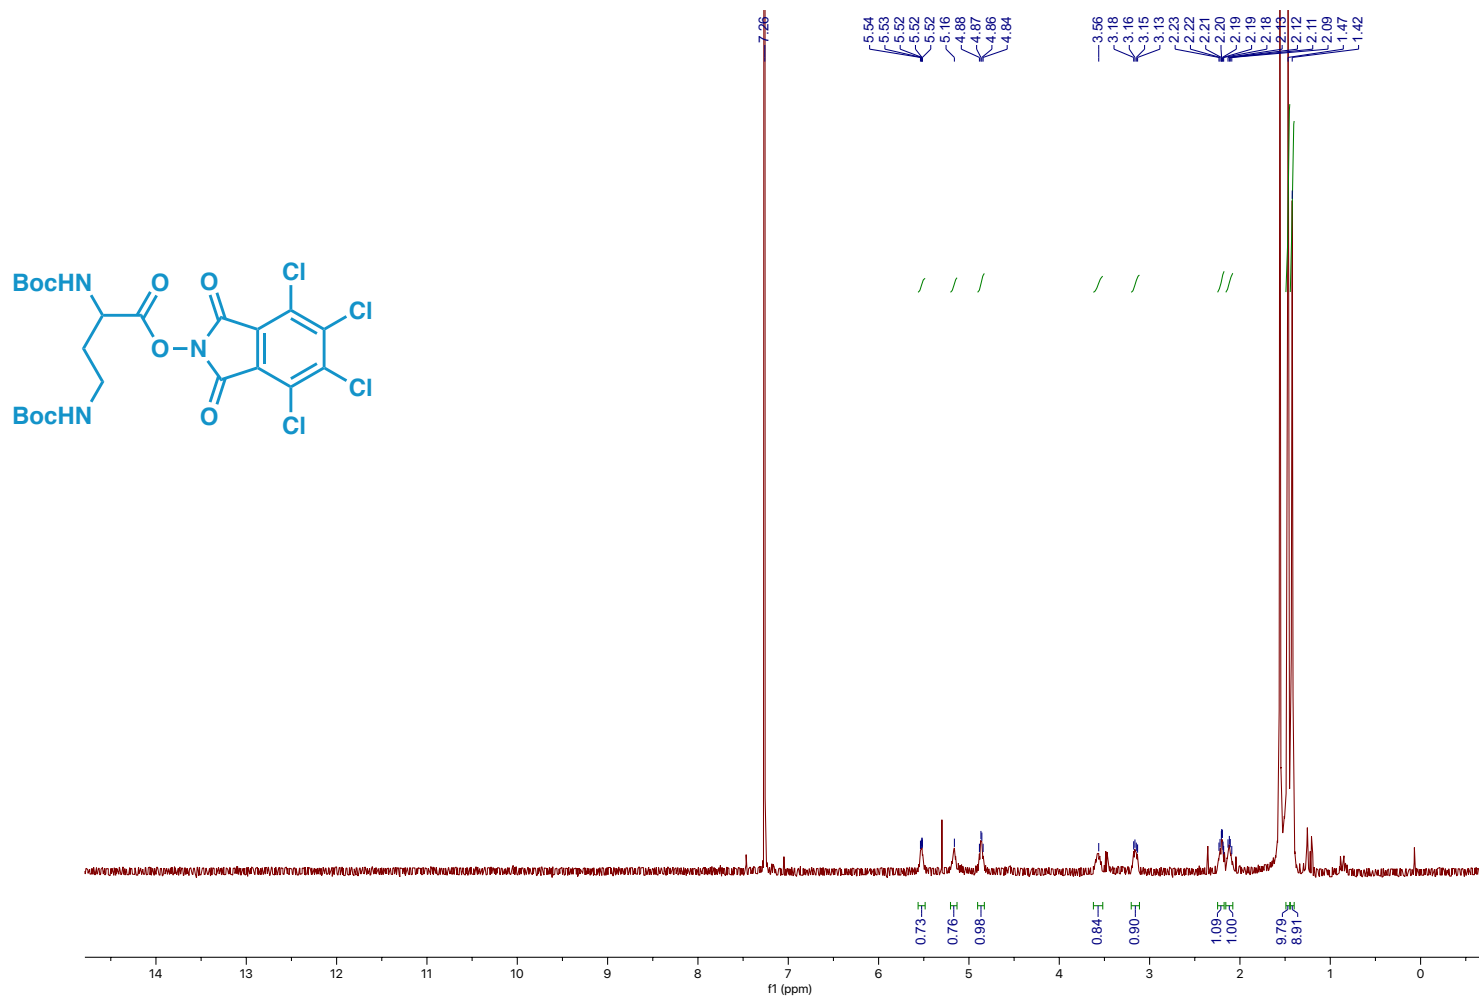

# Compound SI-14 <sup>13</sup>C NMR

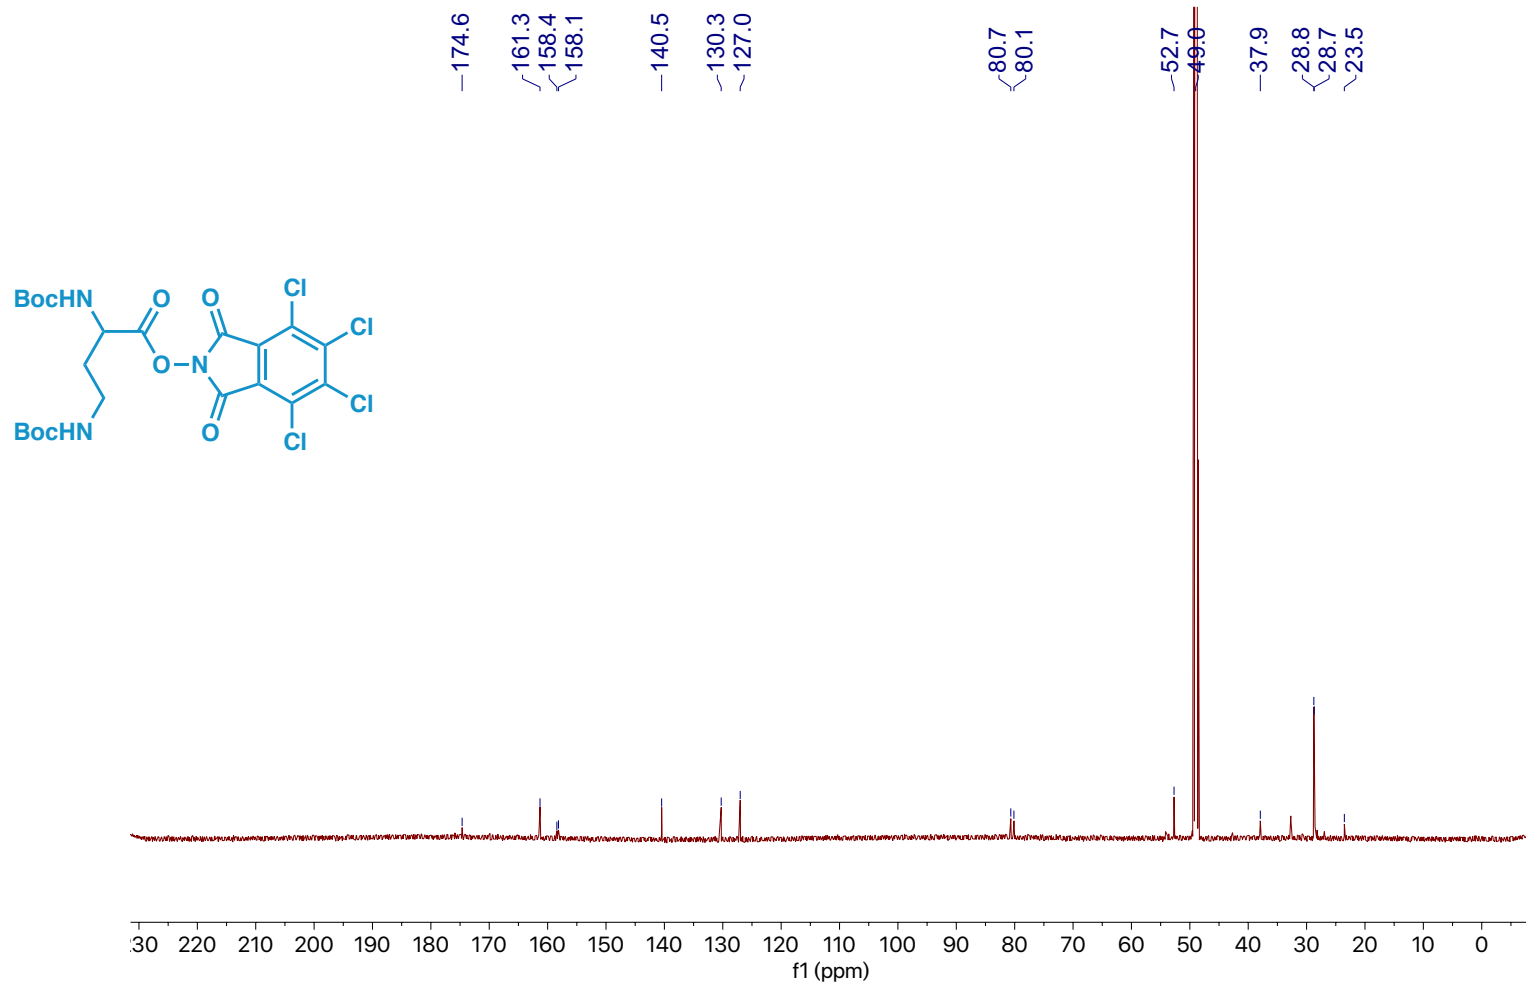

# Compound SI-15 <sup>1</sup>H NMR

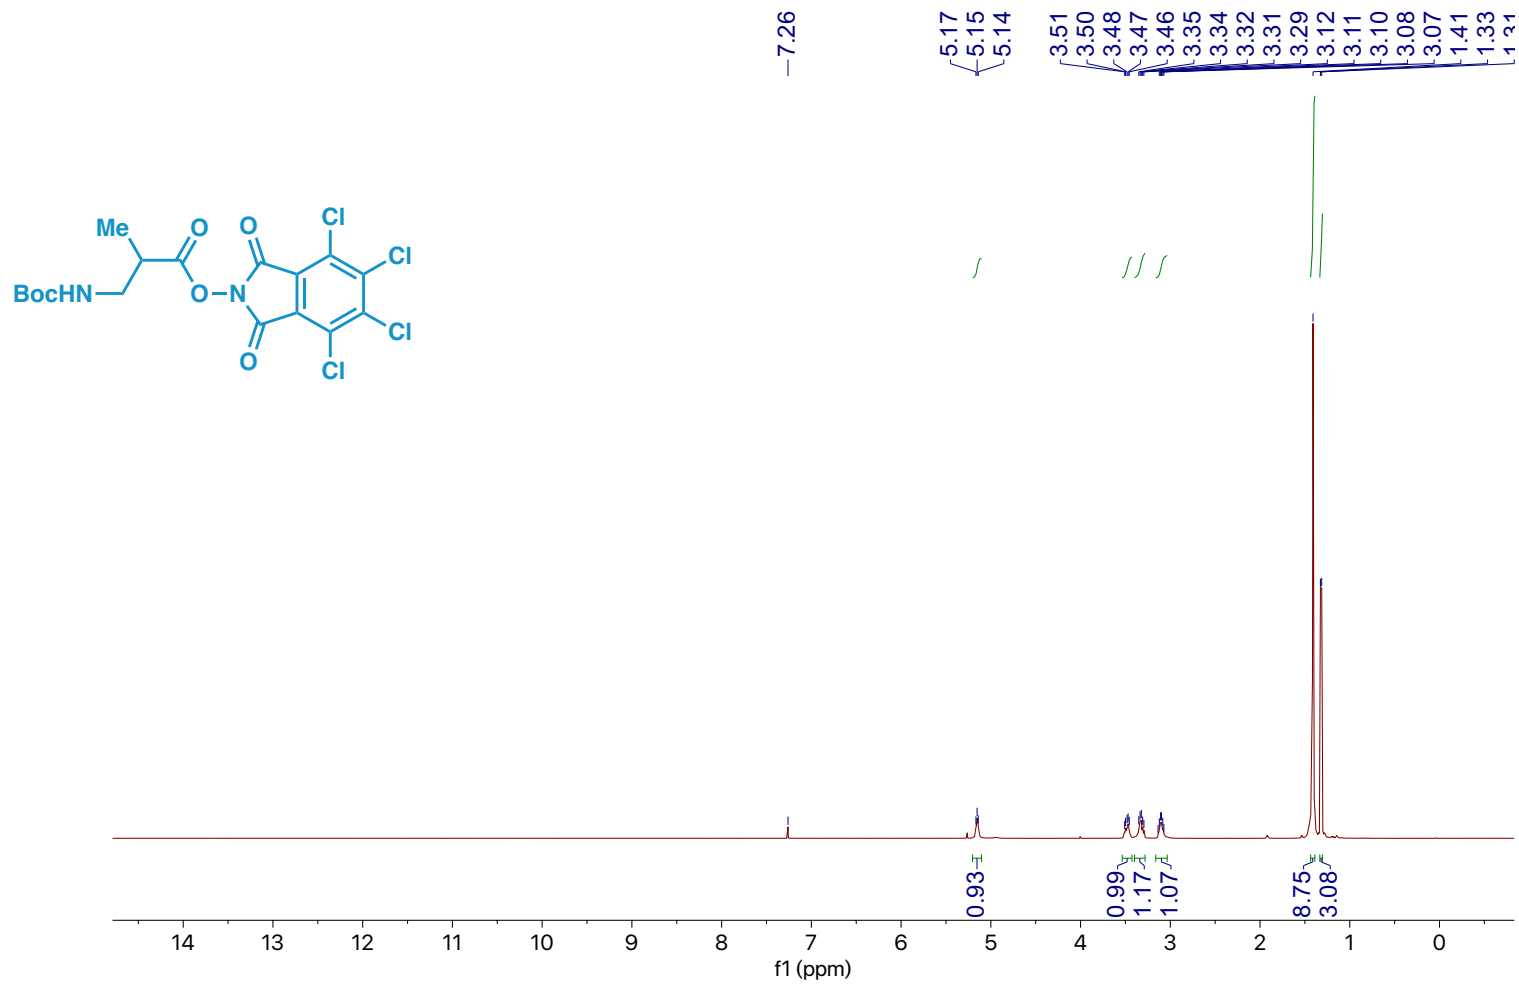

# Compound SI-15 <sup>13</sup>C NMR

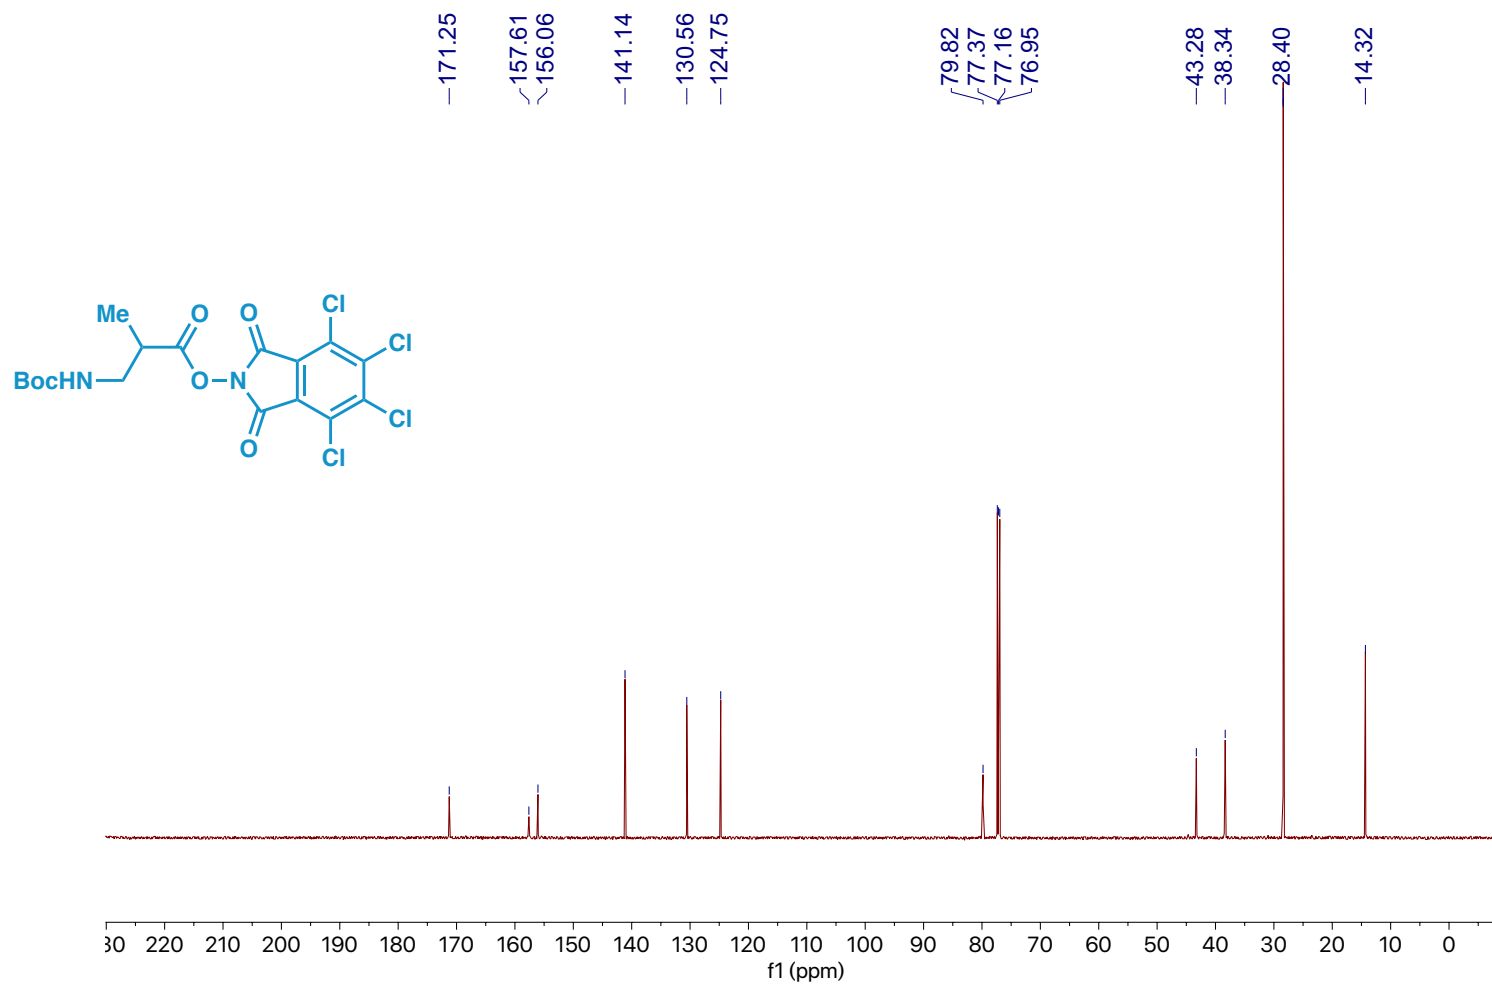

# Compound SI-16 <sup>1</sup>H NMR

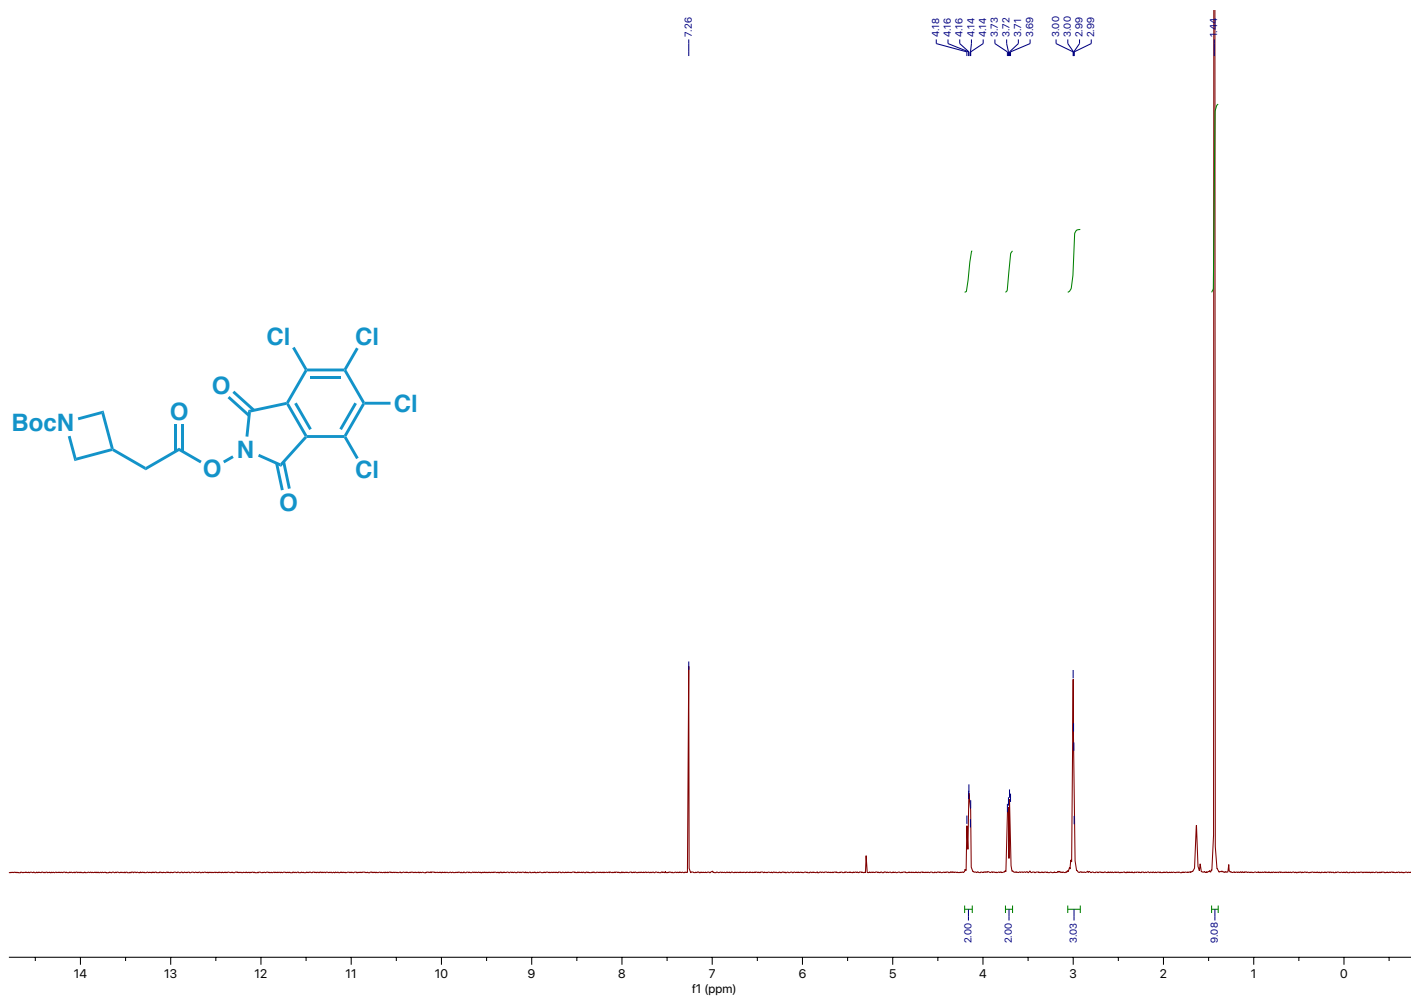

# Compound SI-16 <sup>13</sup>C NMR

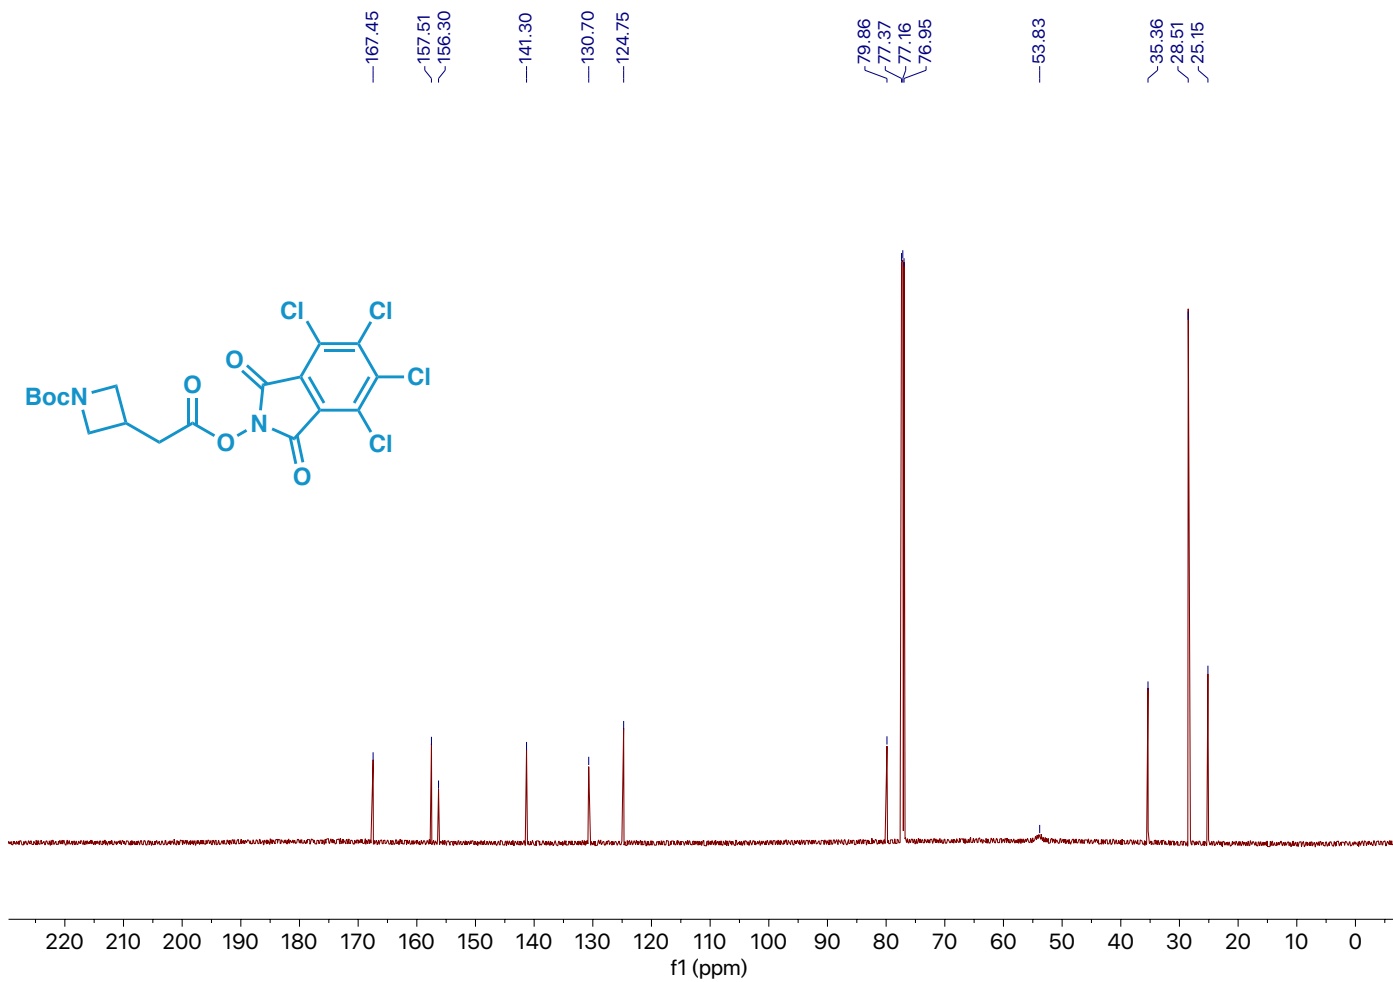

# Compound SI-17 <sup>1</sup>H NMR

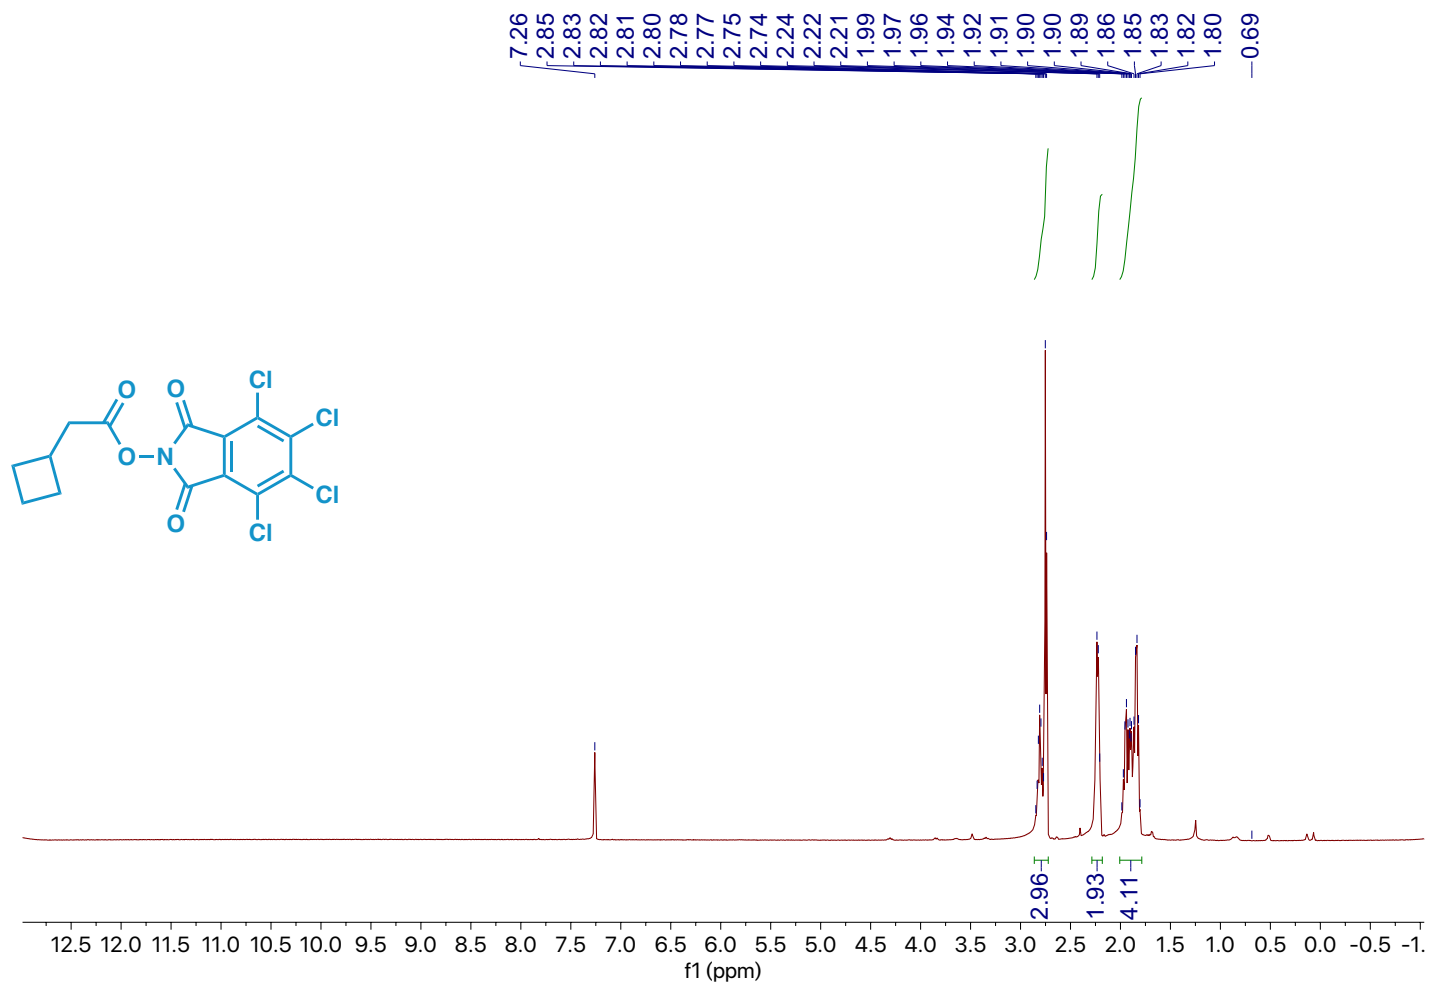

# Compound SI-17 <sup>13</sup>C NMR

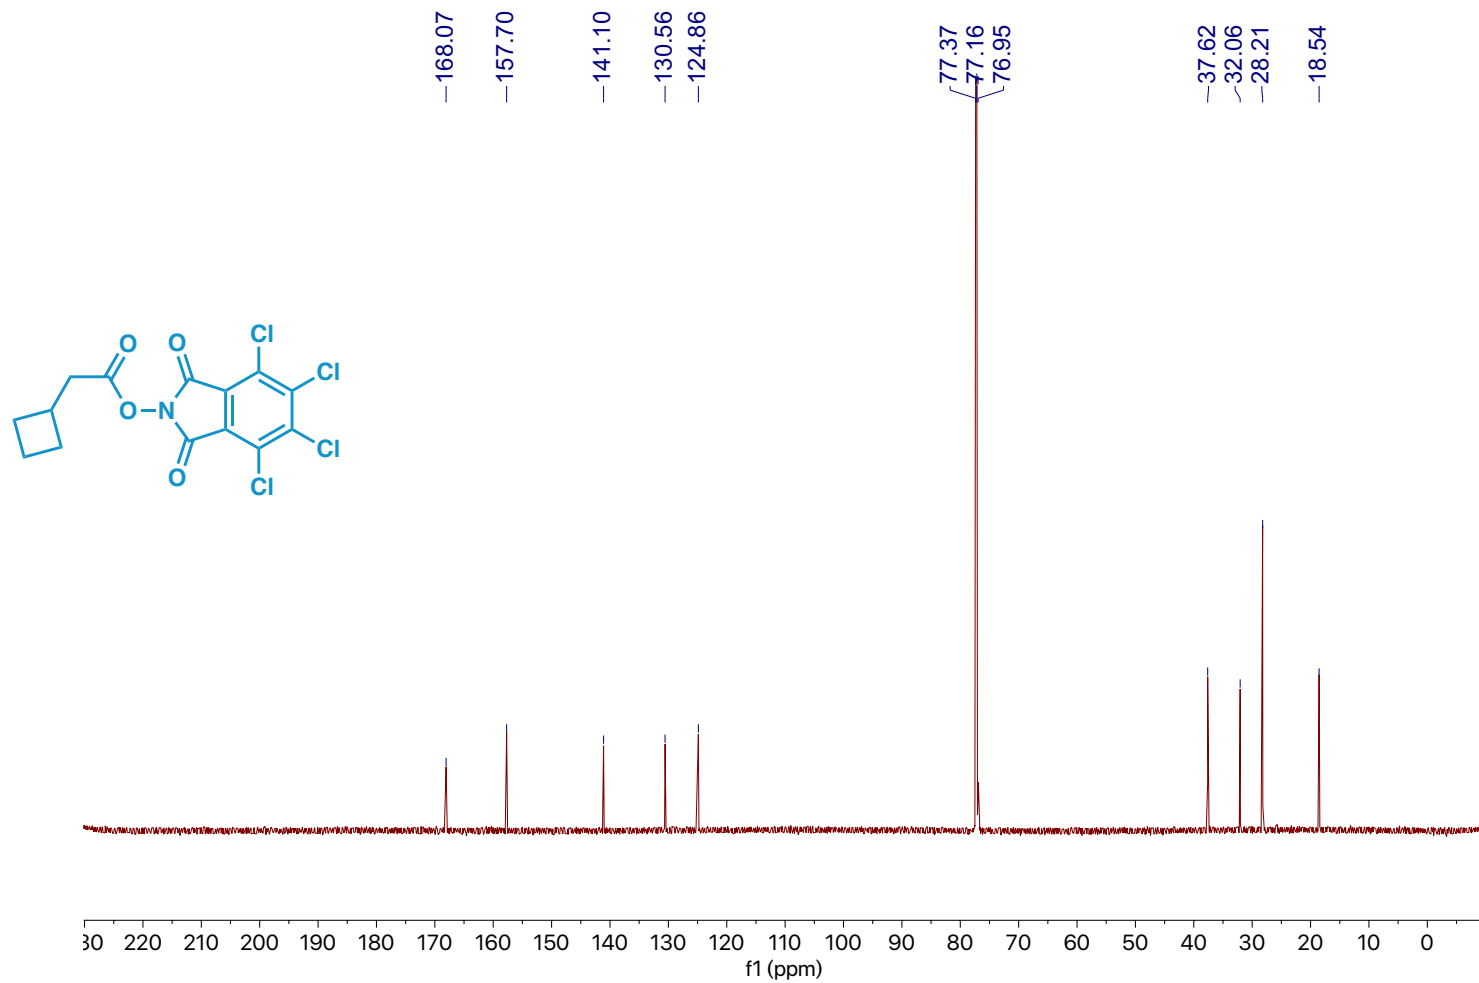



# Compound SI-18 <sup>1</sup>H NMR

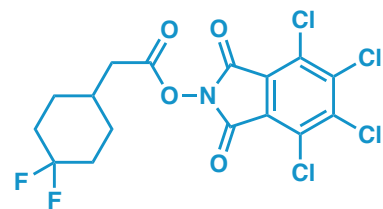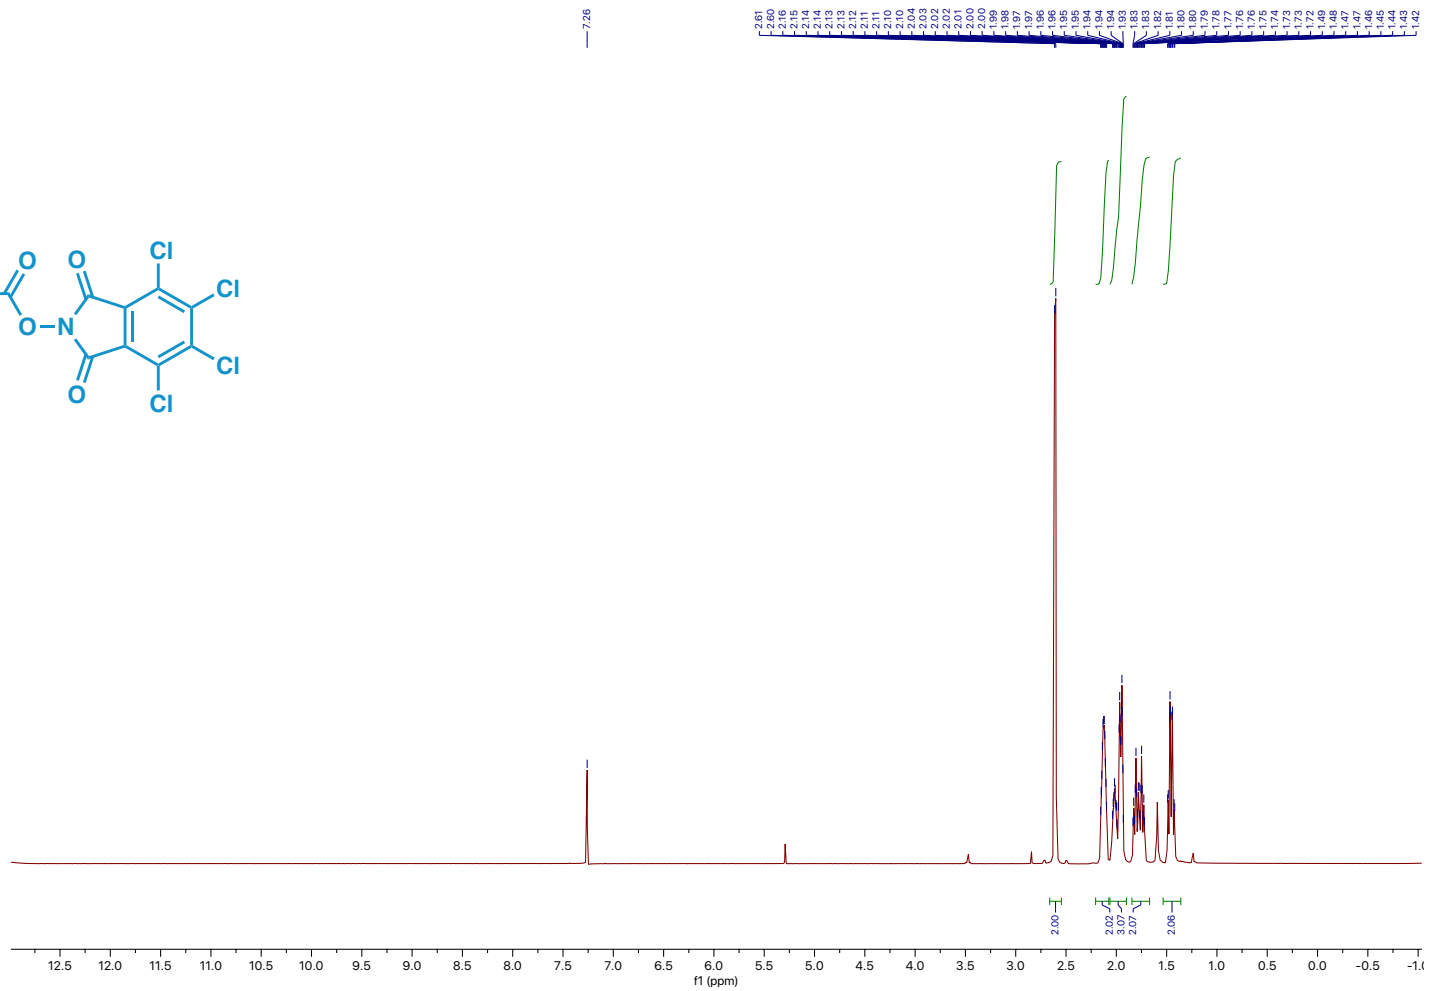

# Compound SI-18 <sup>13</sup>C NMR

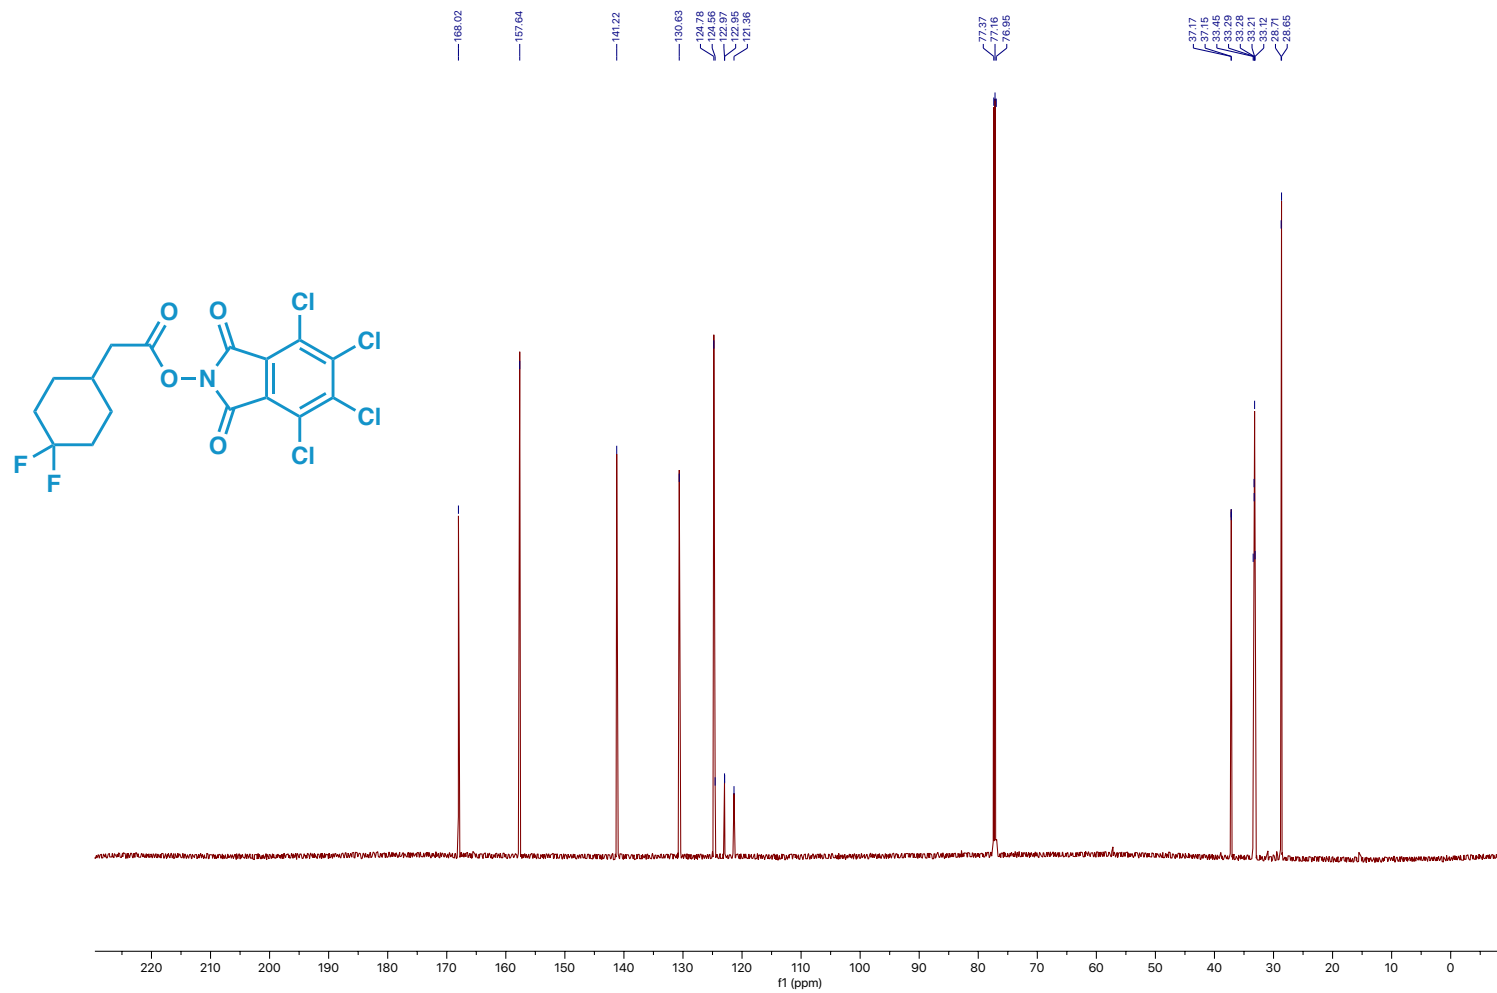

# Compound SI-18 <sup>19</sup>F NMR

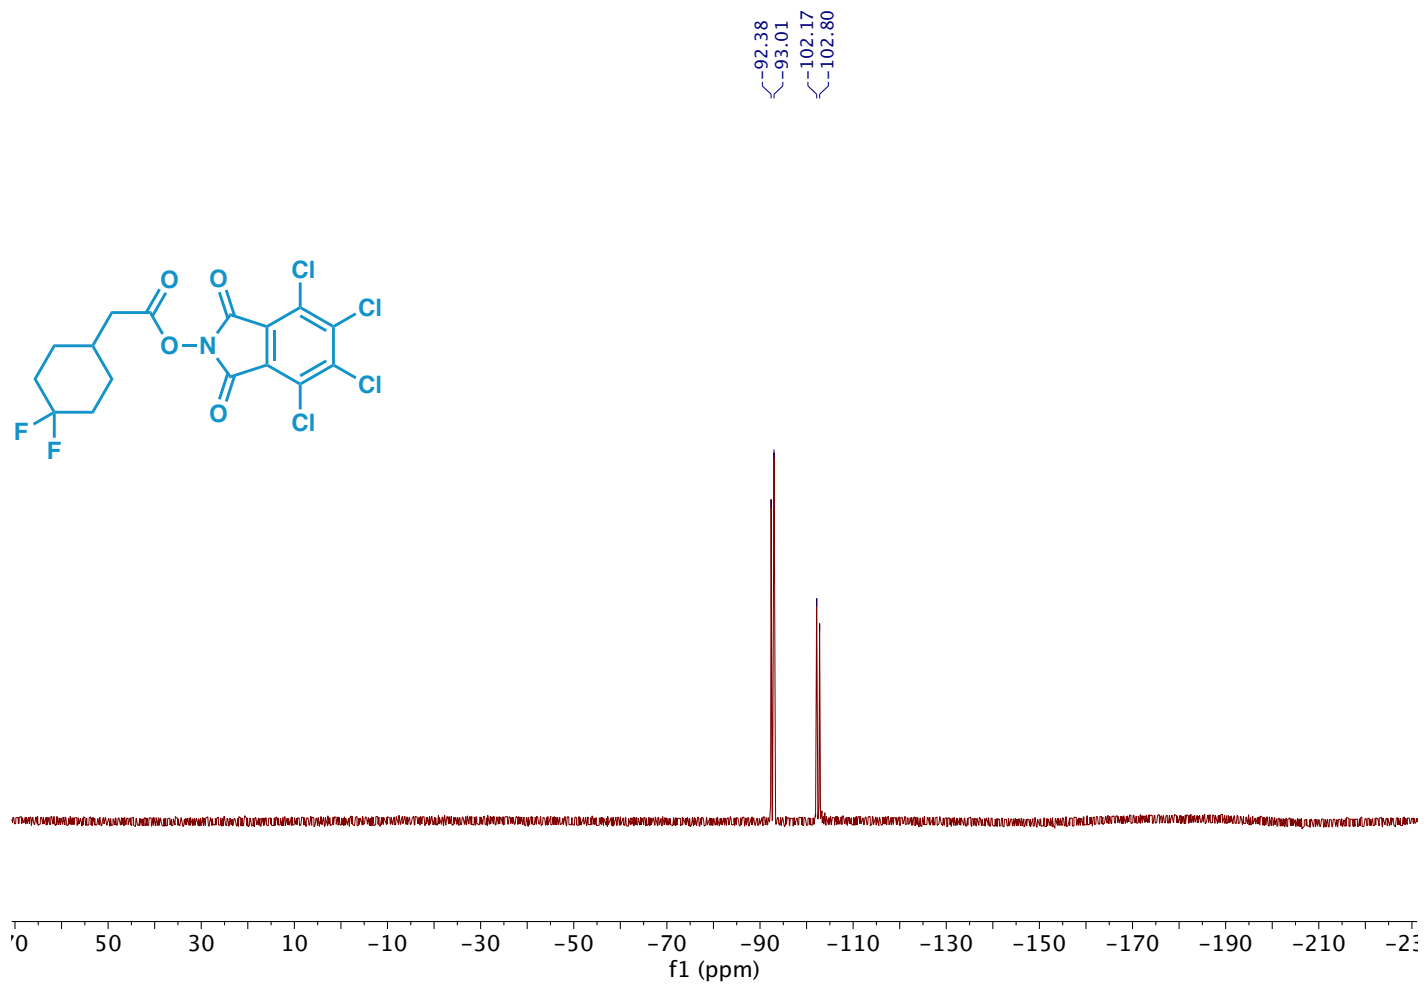

# Compound SI-19 <sup>1</sup>H NMR

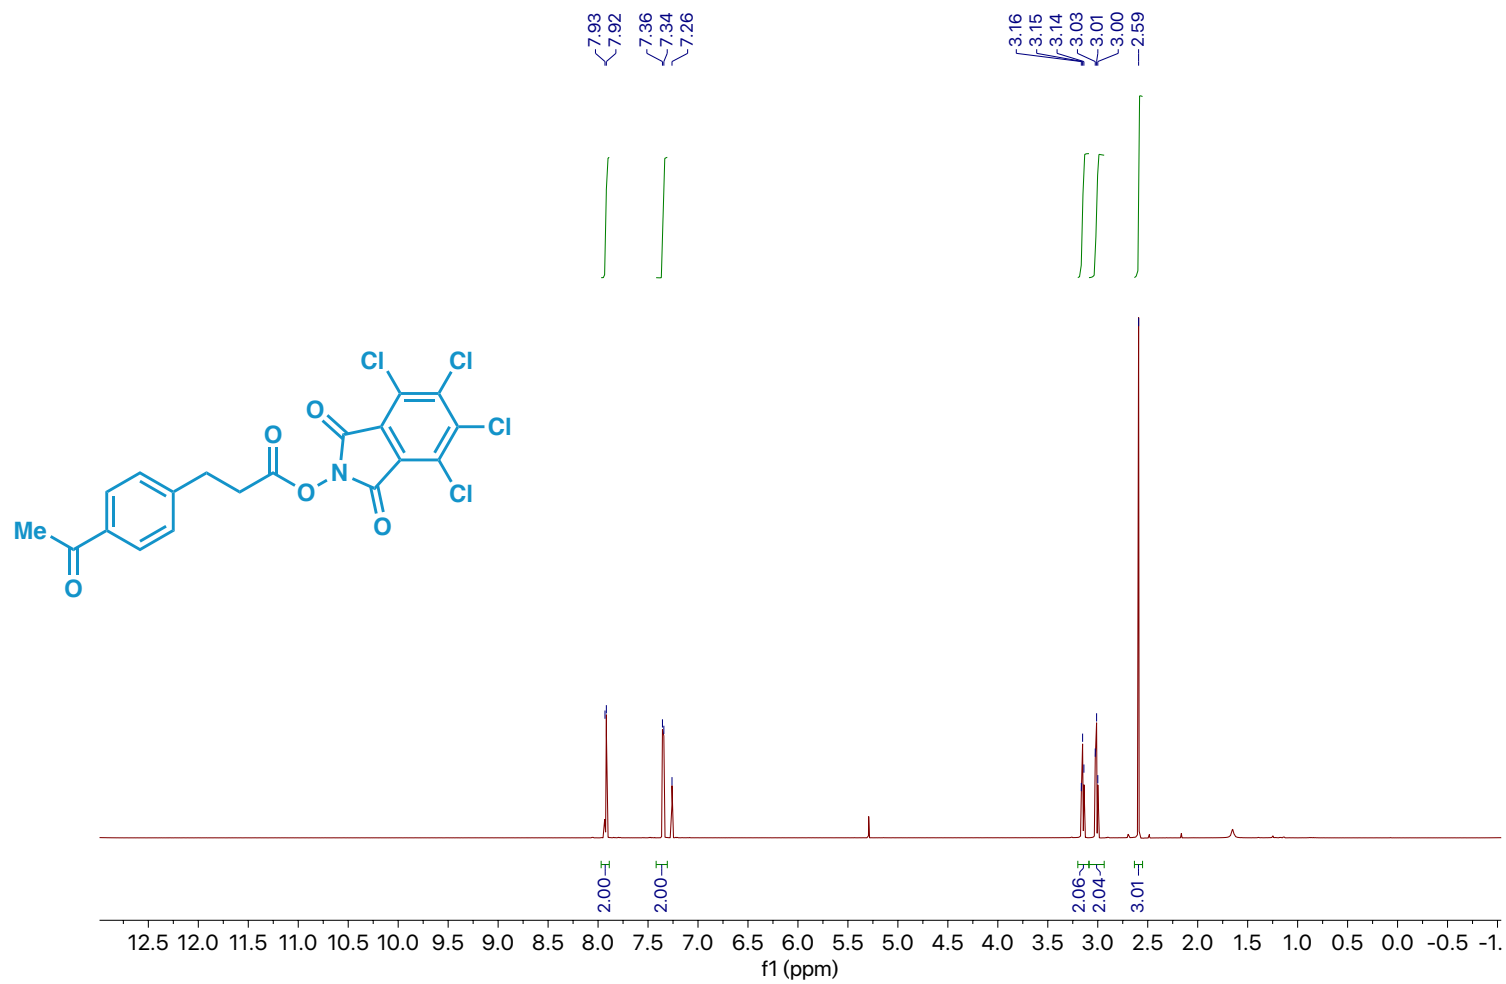

# Compound SI-19 <sup>13</sup>C NMR

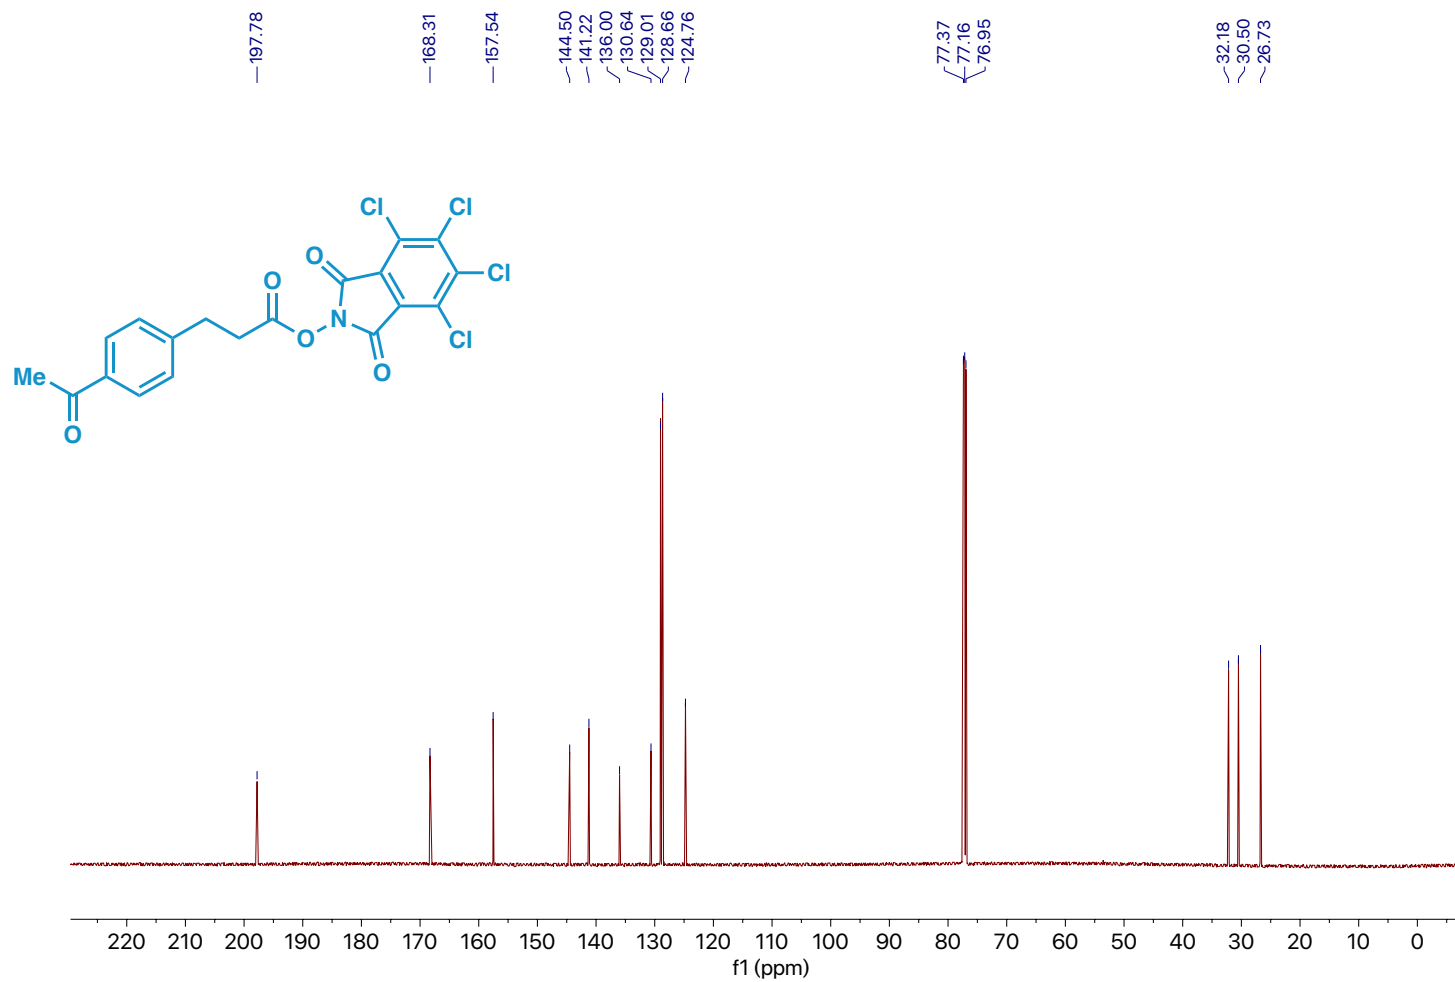

# Compound SI-20 <sup>1</sup>H NMR

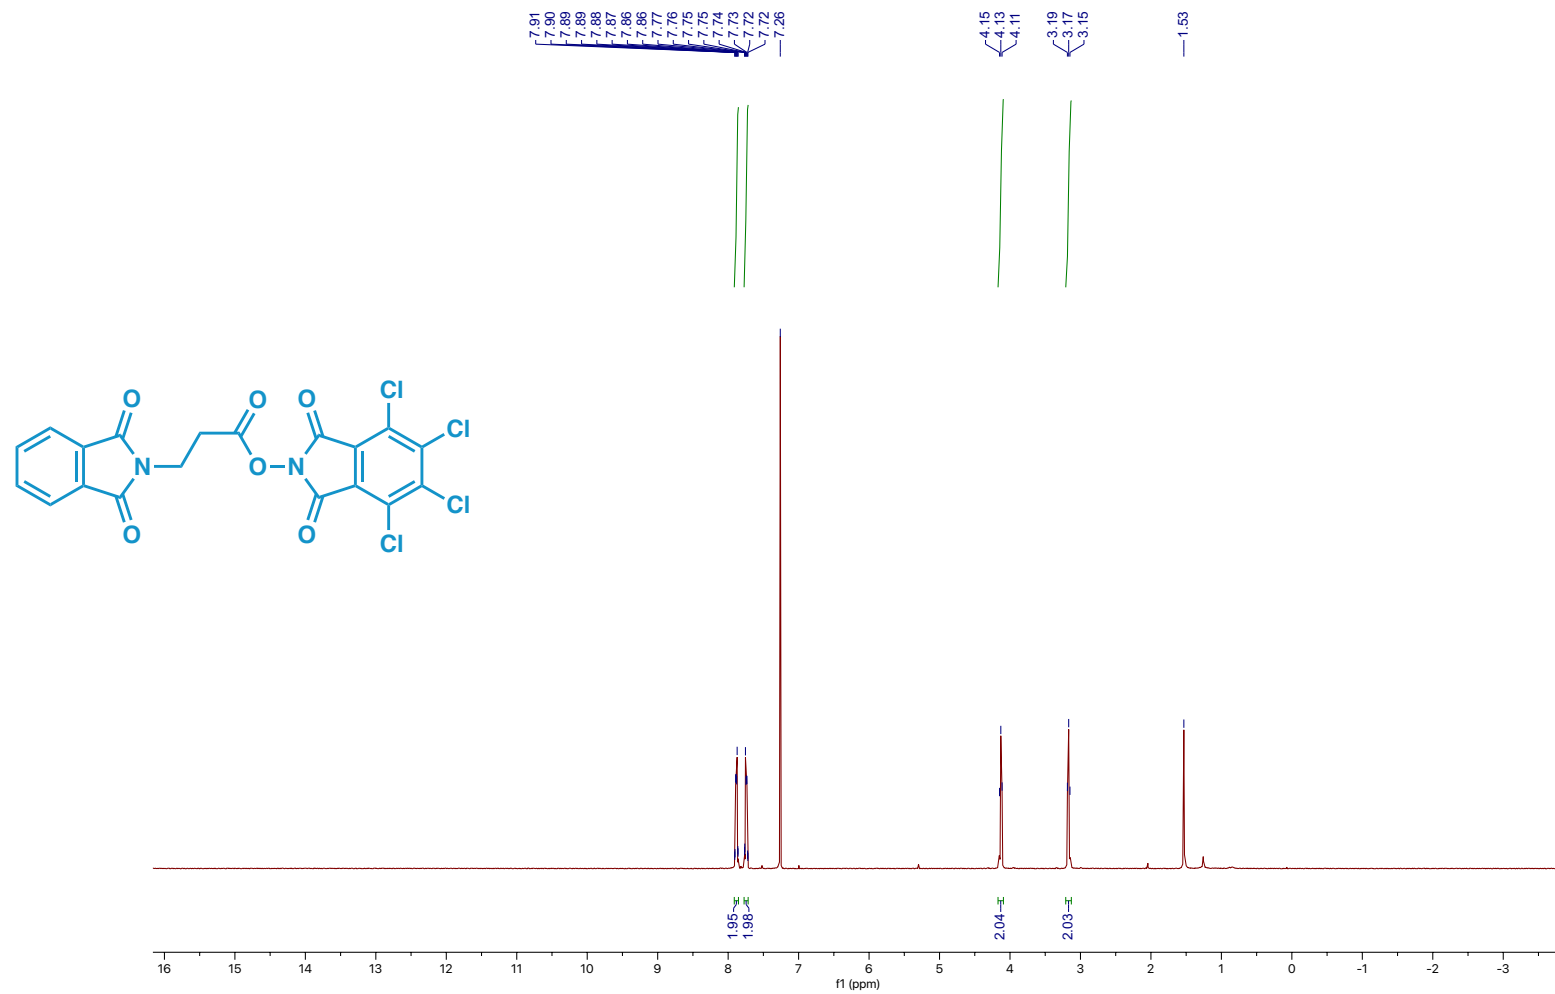

# Compound SI-20 <sup>13</sup>C NMR

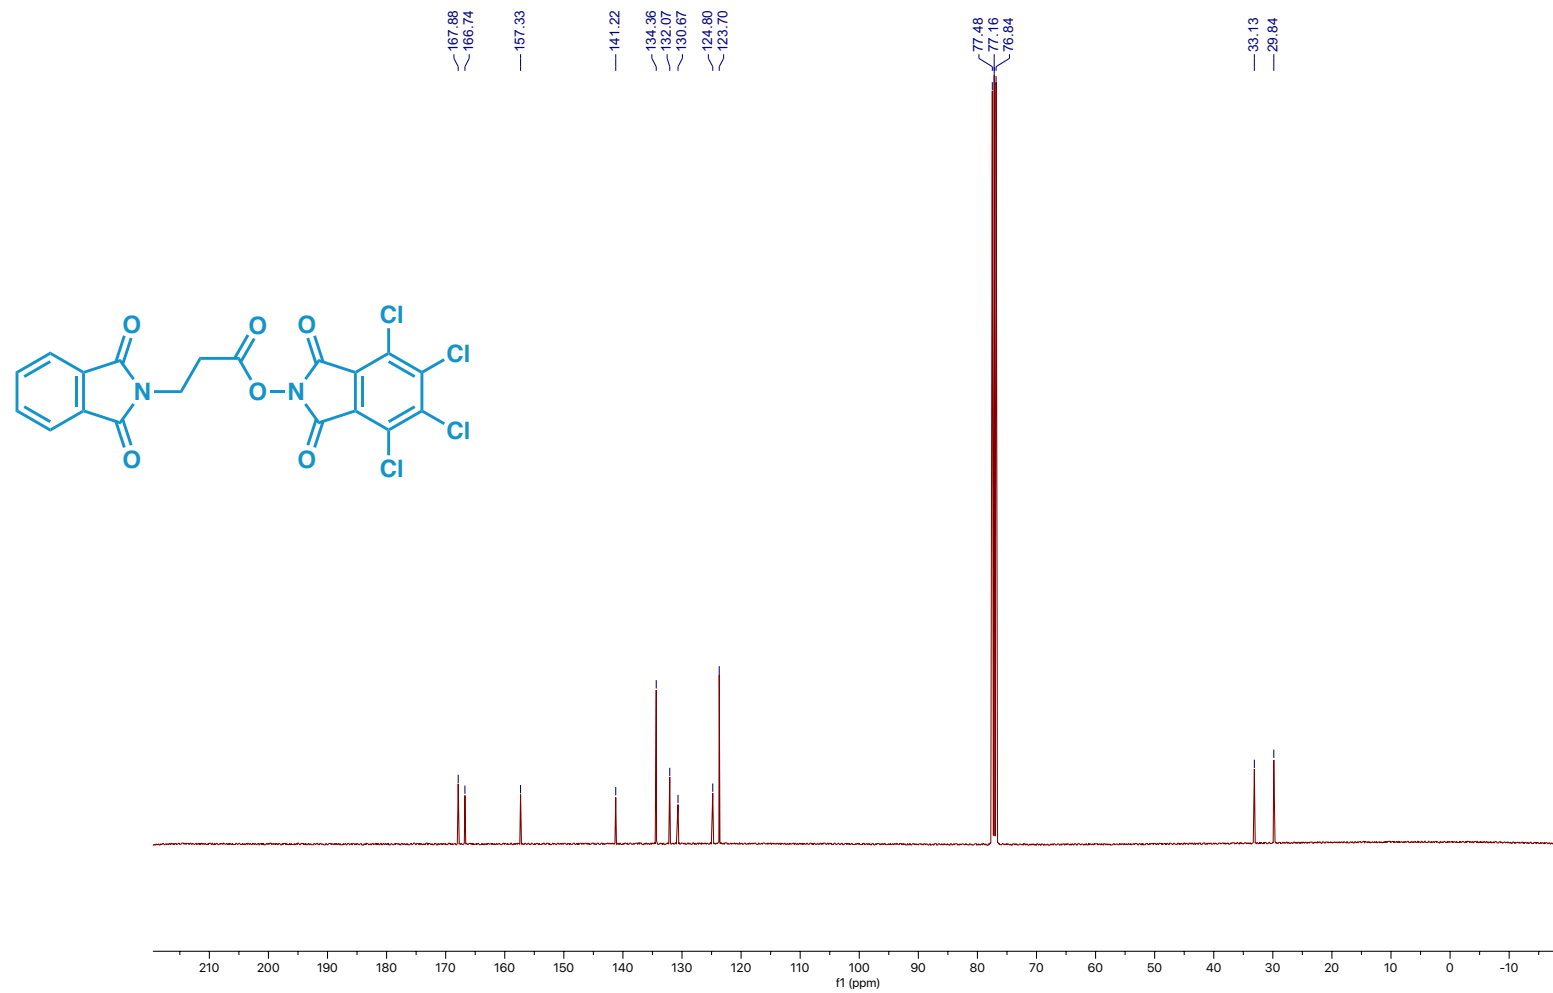

# Compound SI-21 <sup>1</sup>H NMR

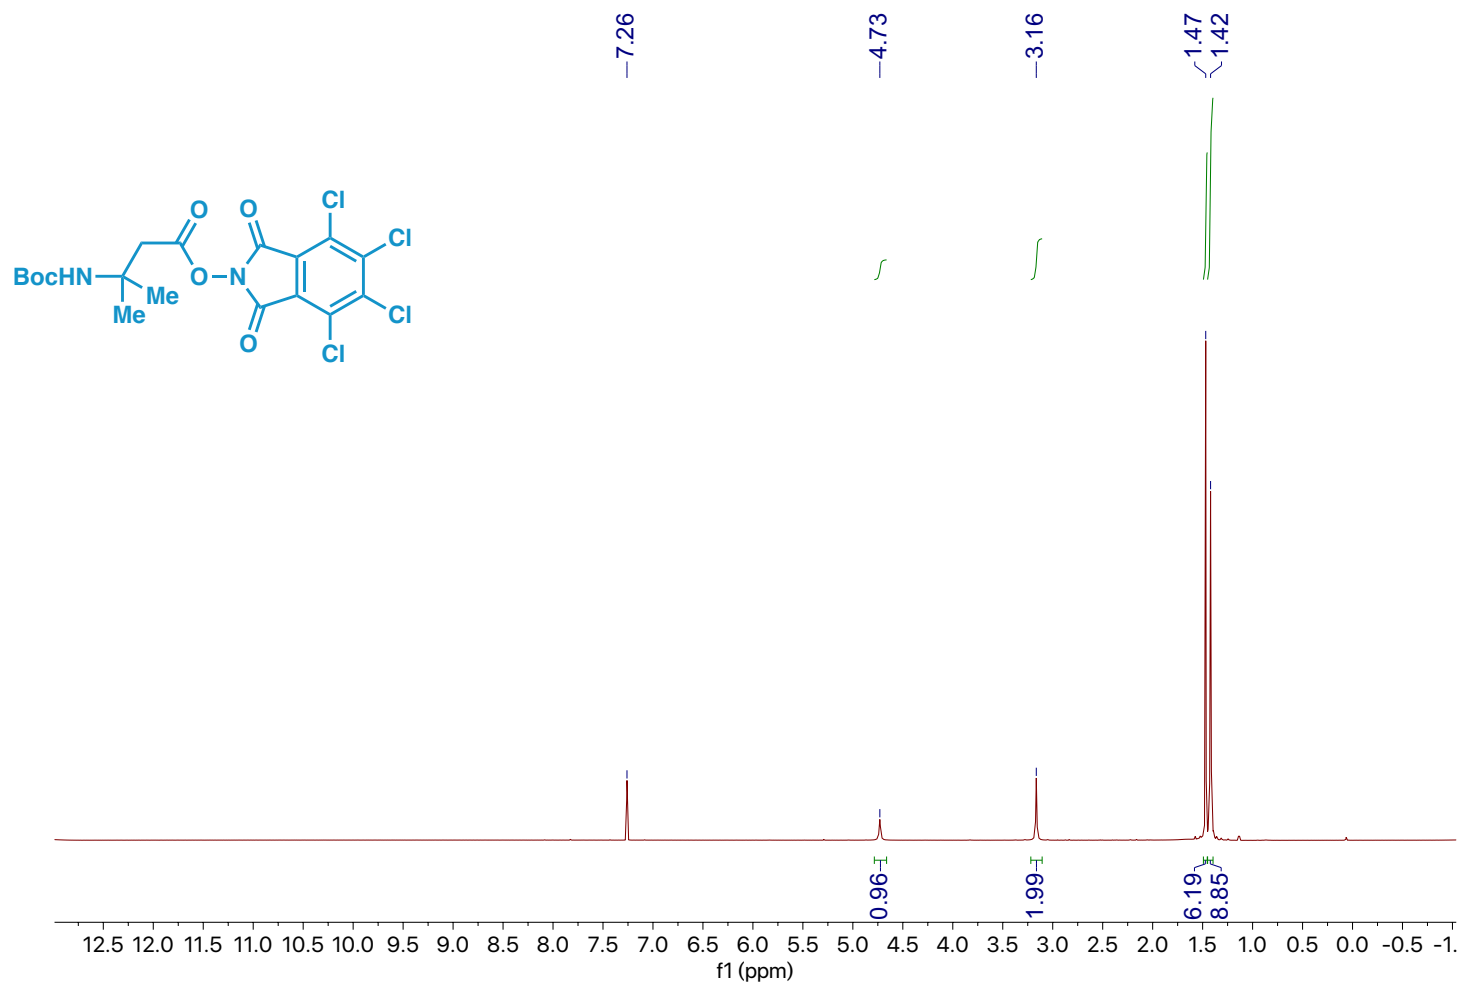



# Compound SI-21 <sup>13</sup>C NMR

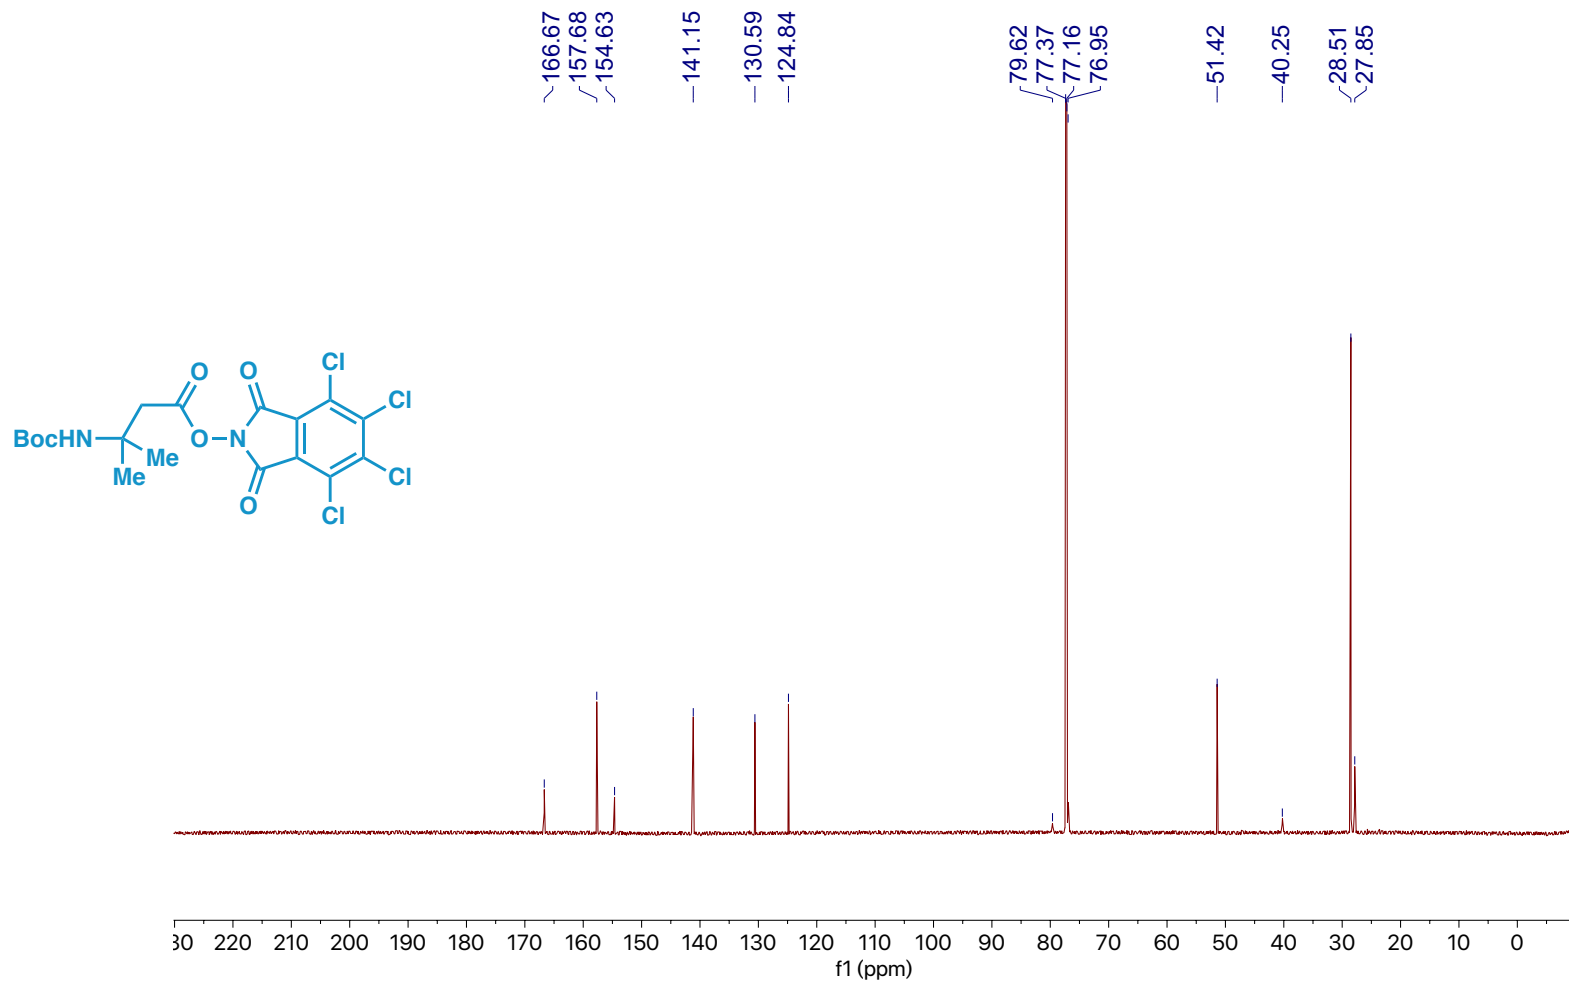

# Compound SI-22 <sup>1</sup>H NMR

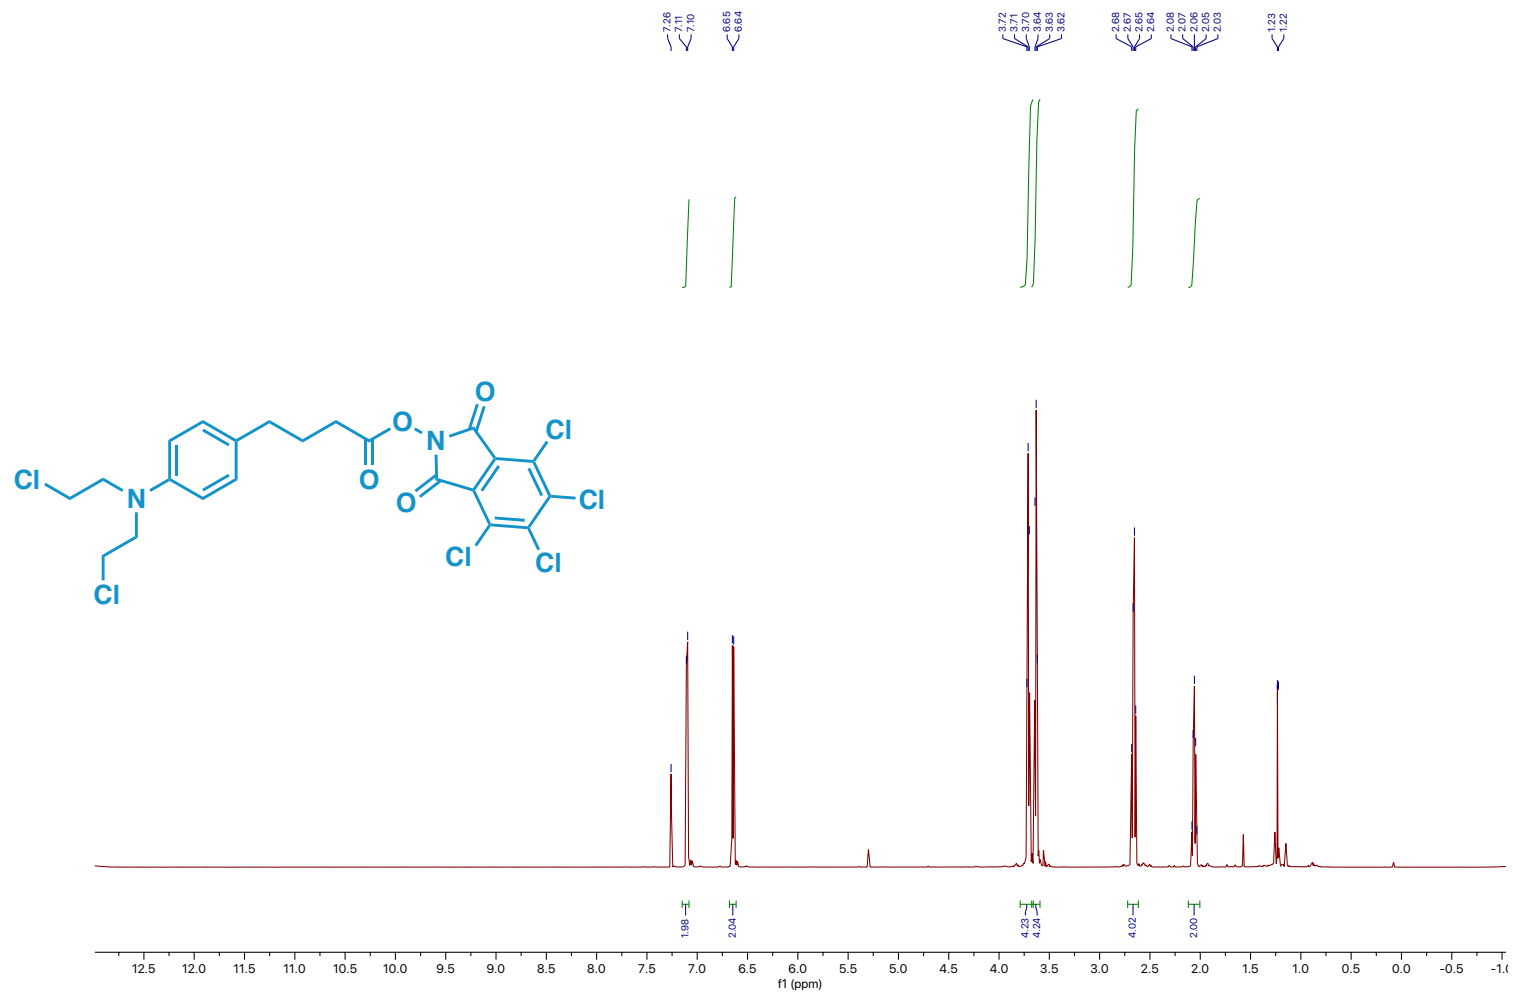

# Compound SI-22 <sup>13</sup>C NMR

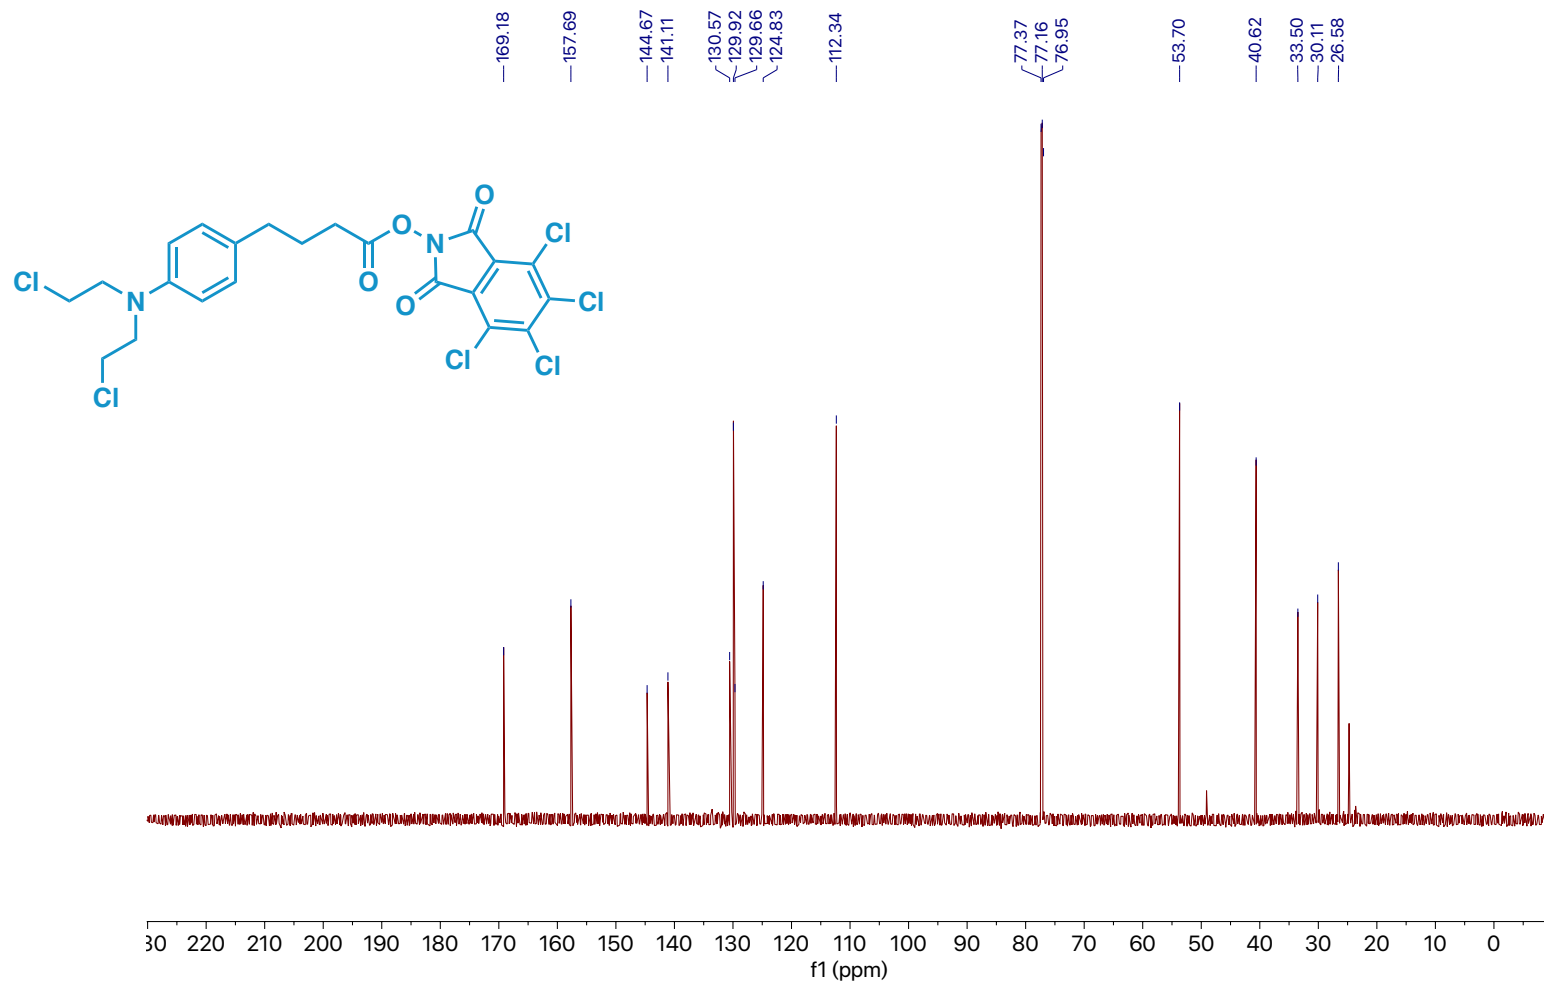



# Compound SI-23 <sup>13</sup>C NMR

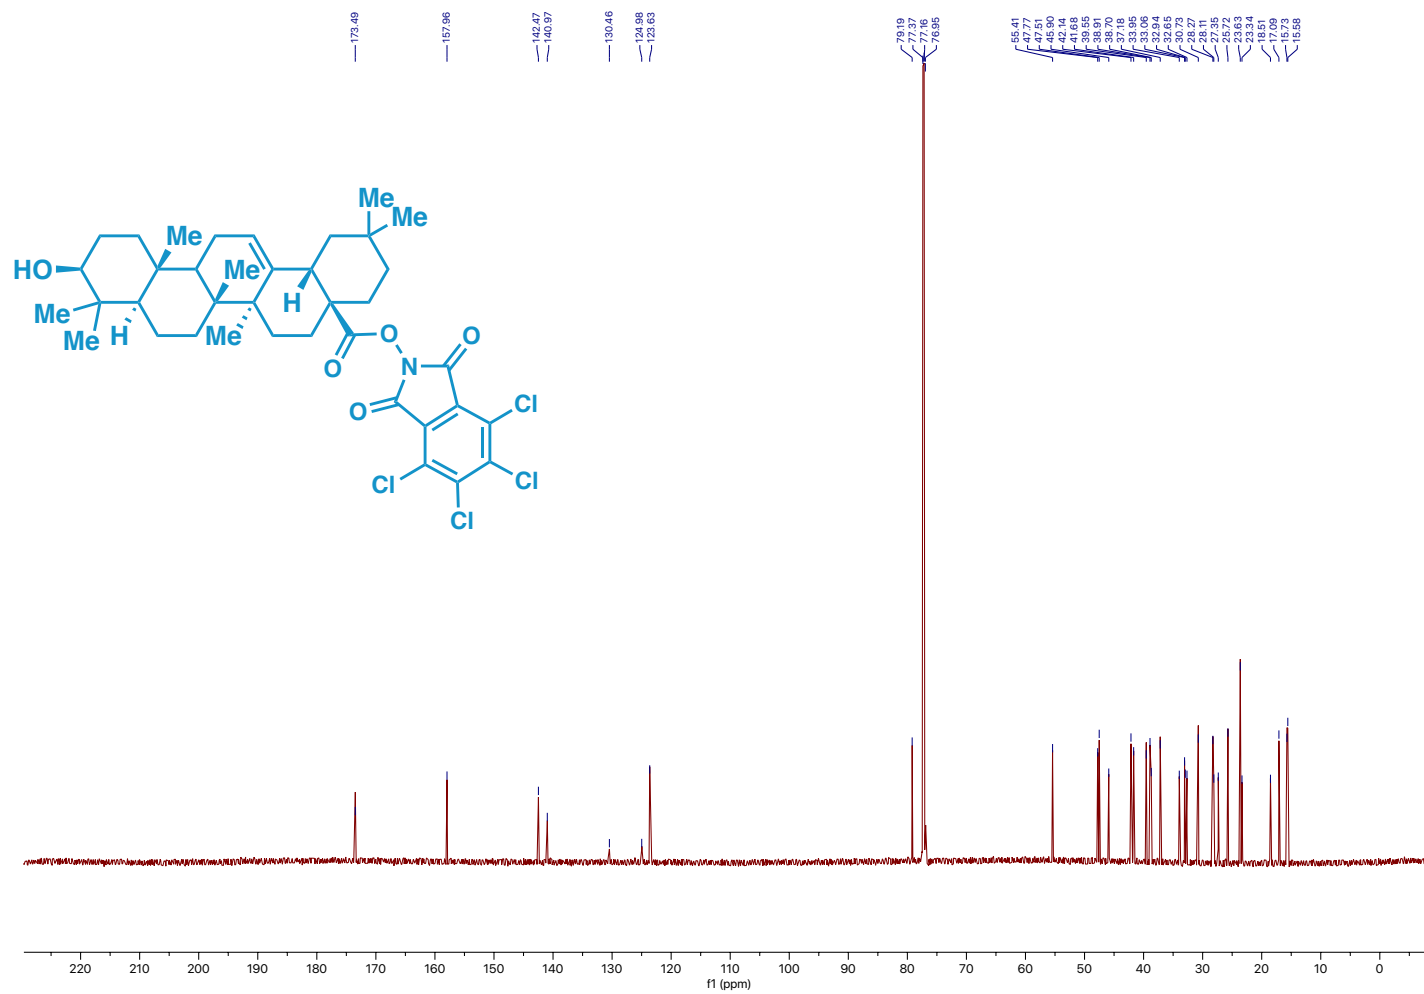

# Compound SI-24 <sup>1</sup>H NMR

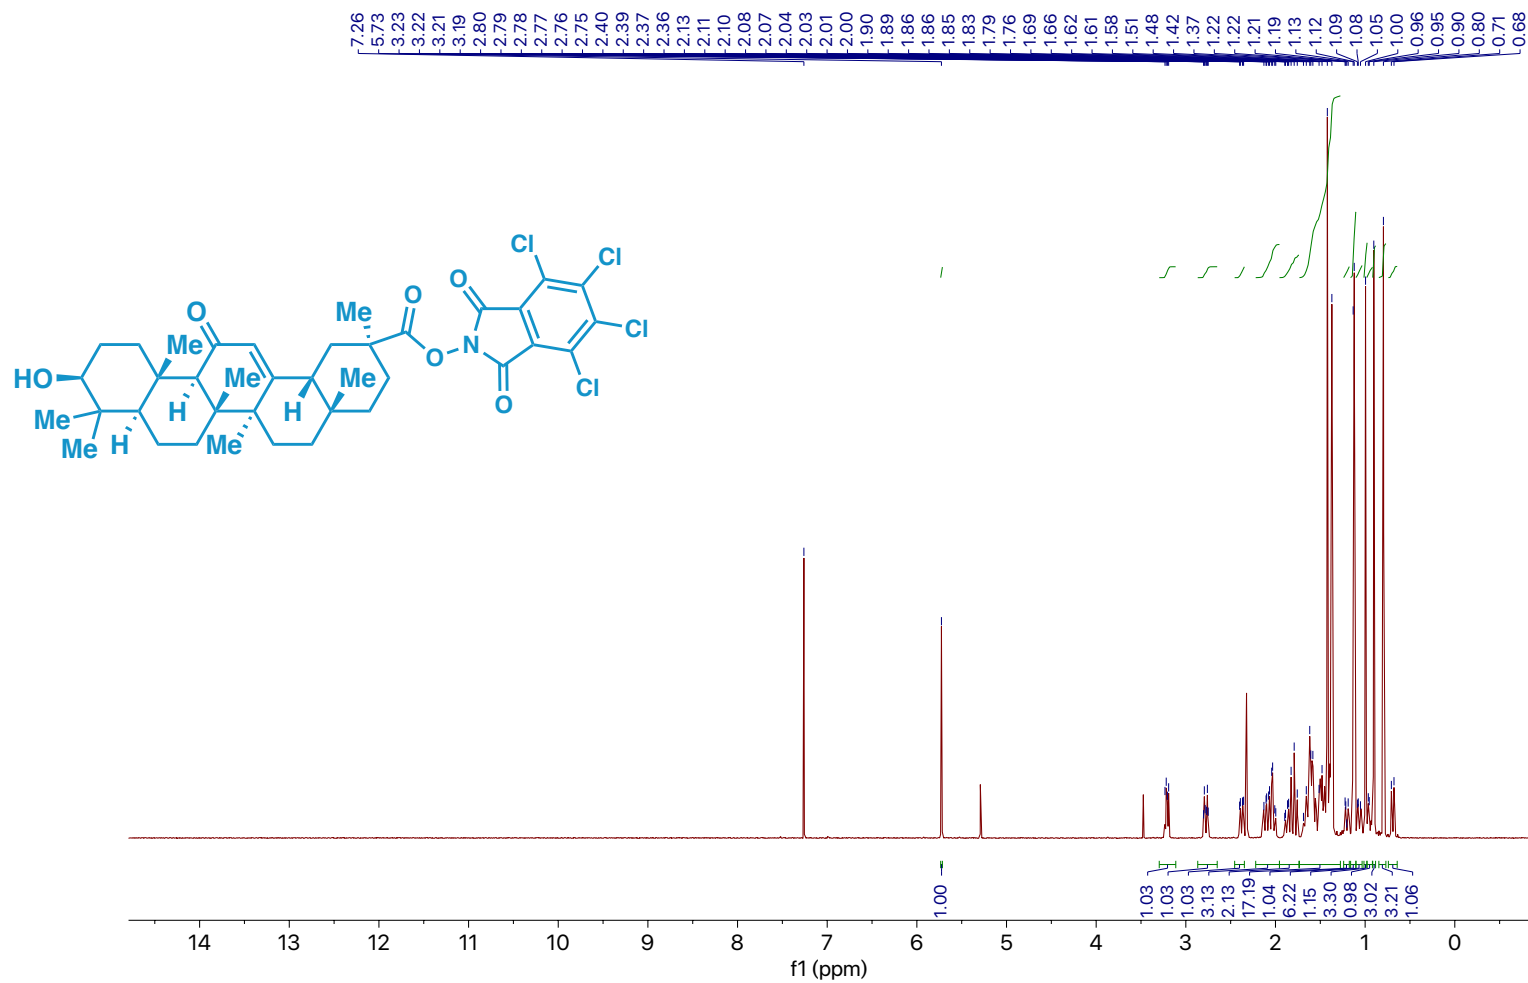

# Compound SI-24 <sup>13</sup>C NMR

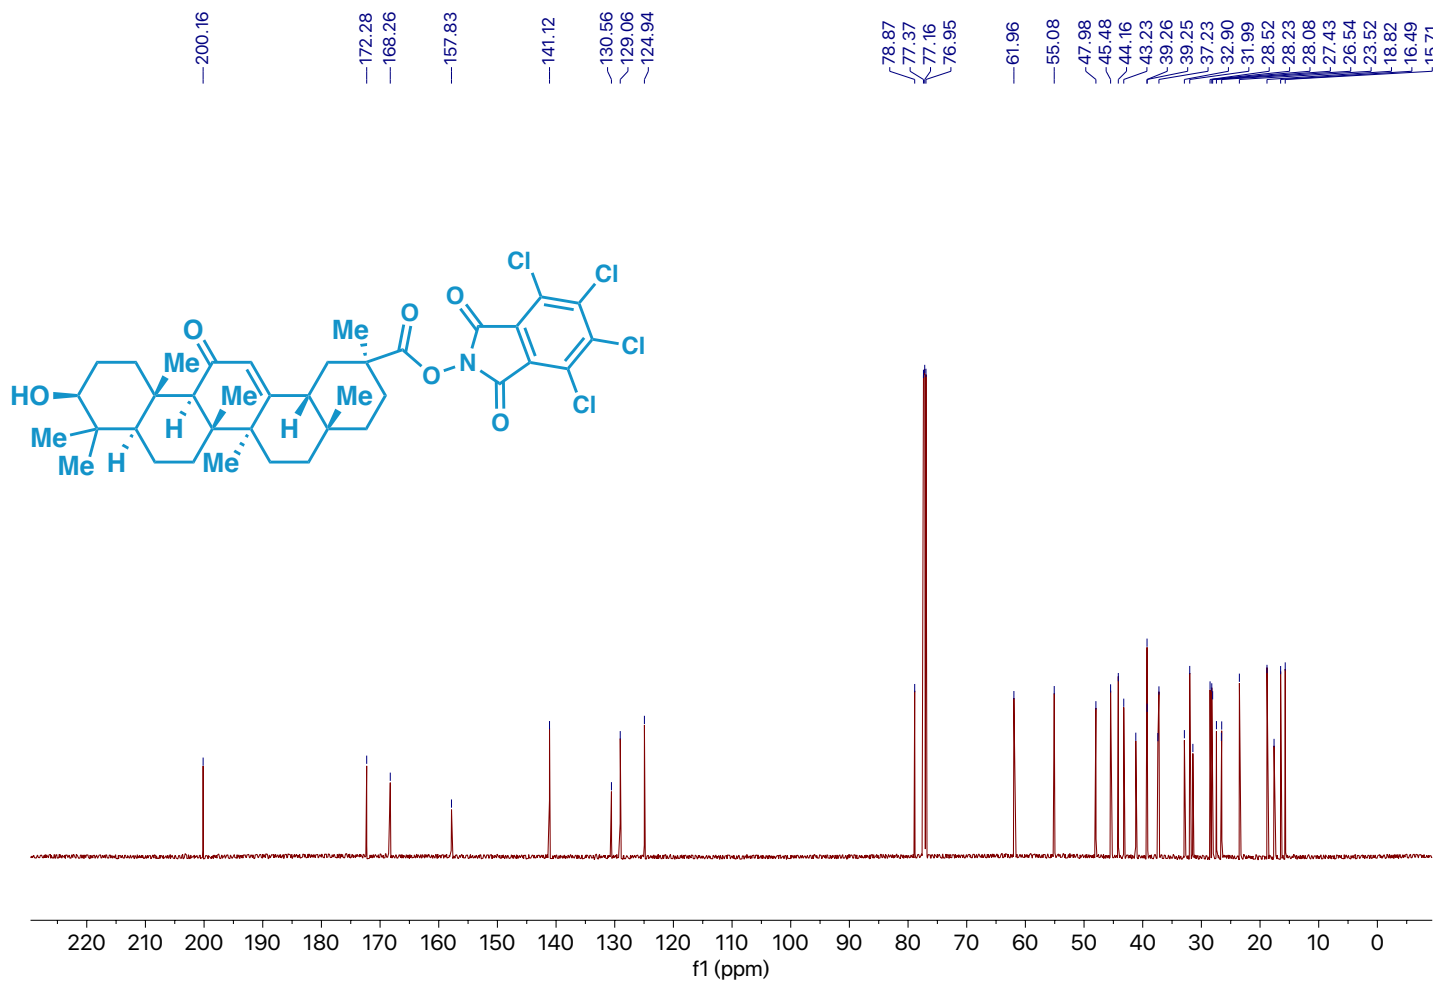

# Compound SI-25 <sup>1</sup>H NMR

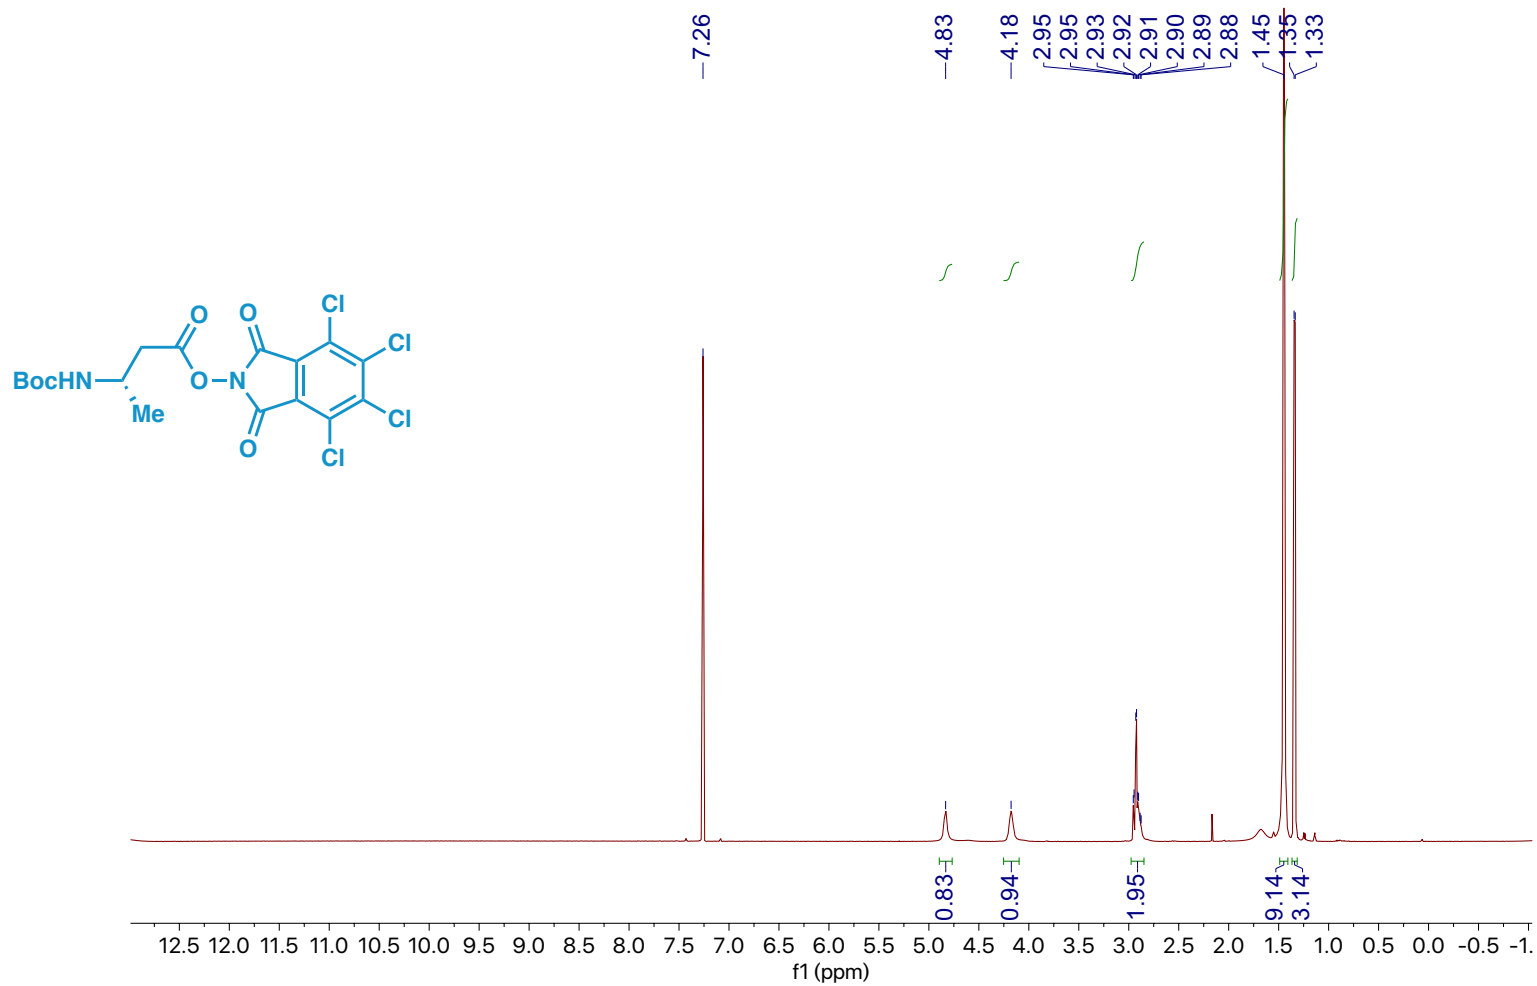



# Compound SI-25 <sup>13</sup>C NMR

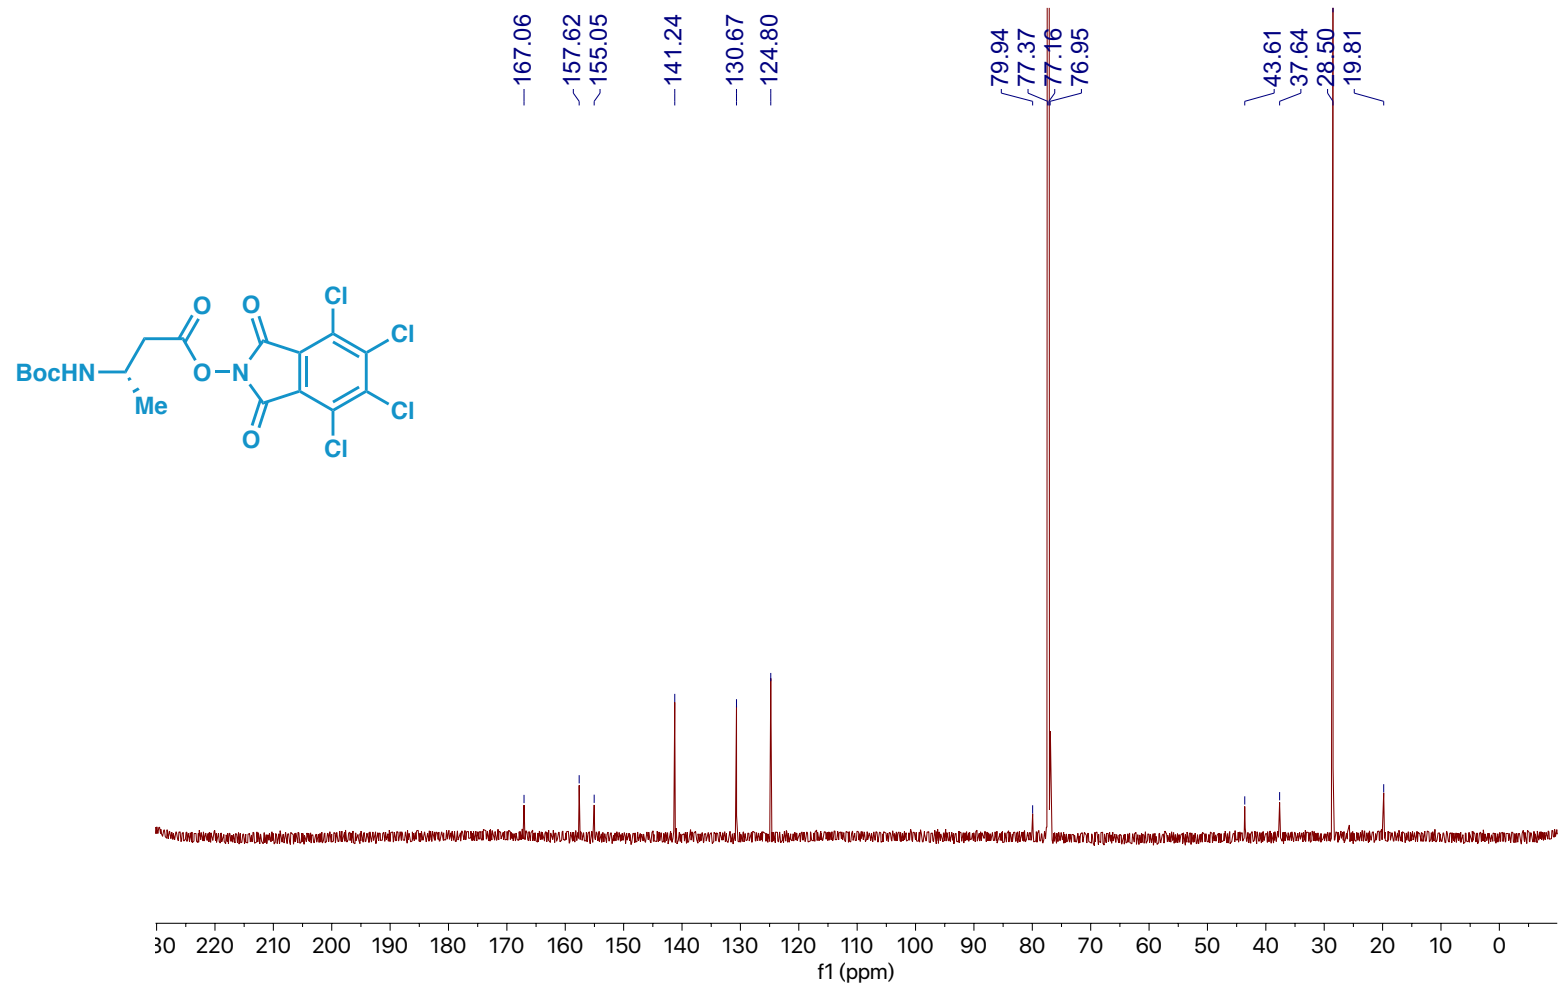

## Spectra for Sulfinimines

### Compound 2 <sup>1</sup>H NMR

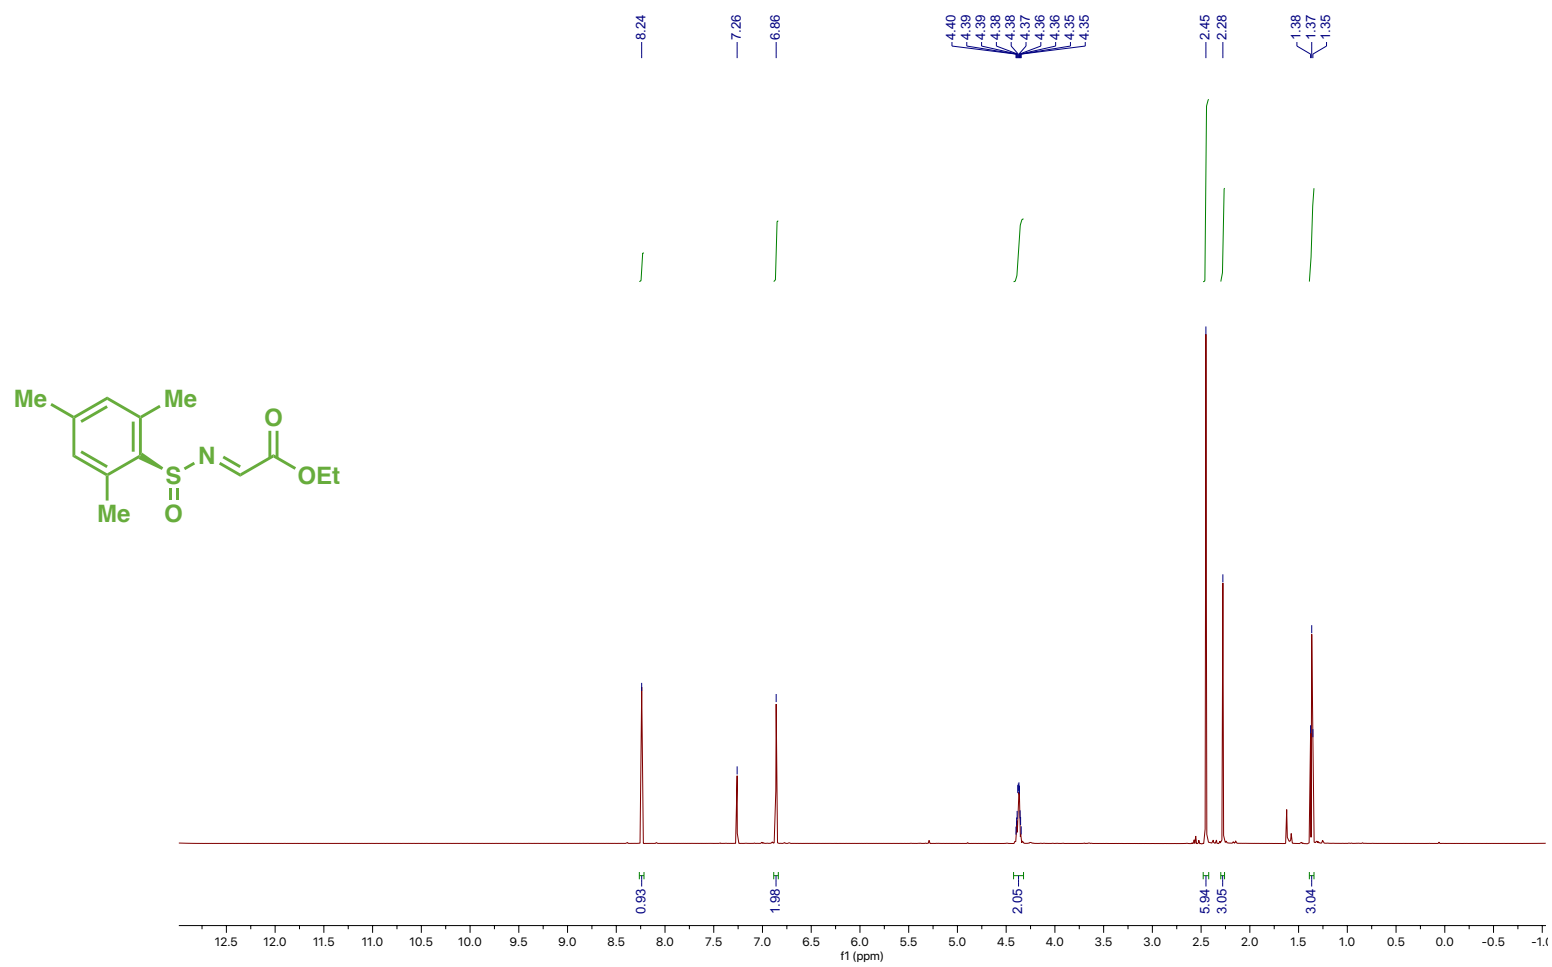

# Compound 2 <sup>13</sup>C NMR

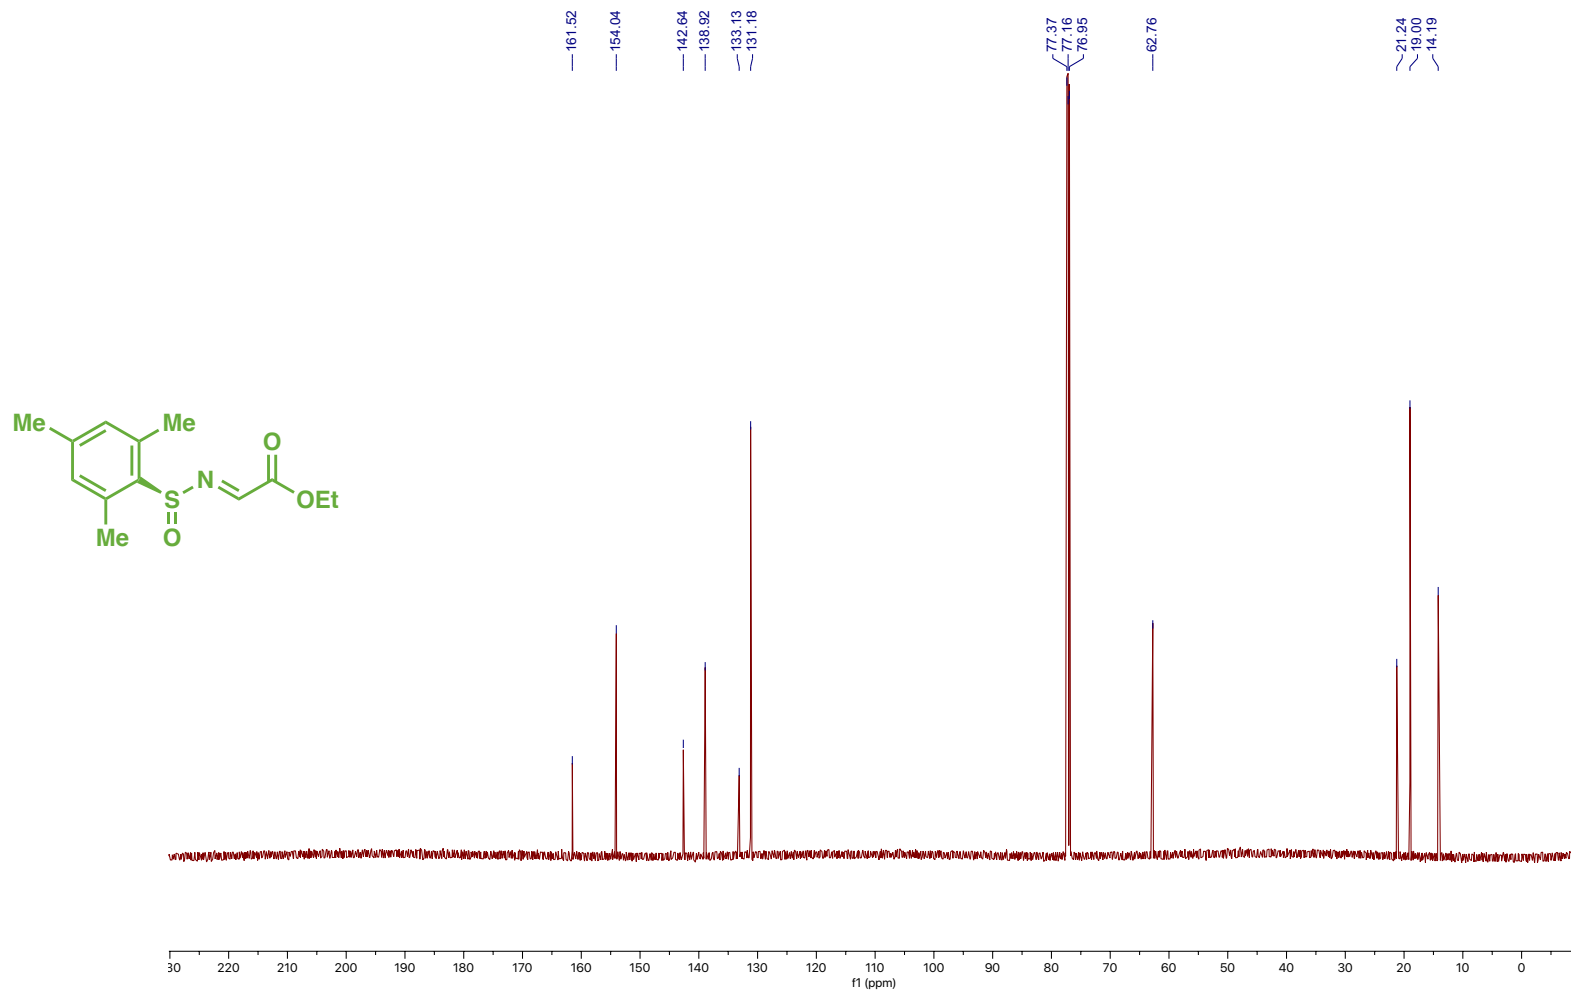

# Compound 2b <sup>1</sup>H NMR

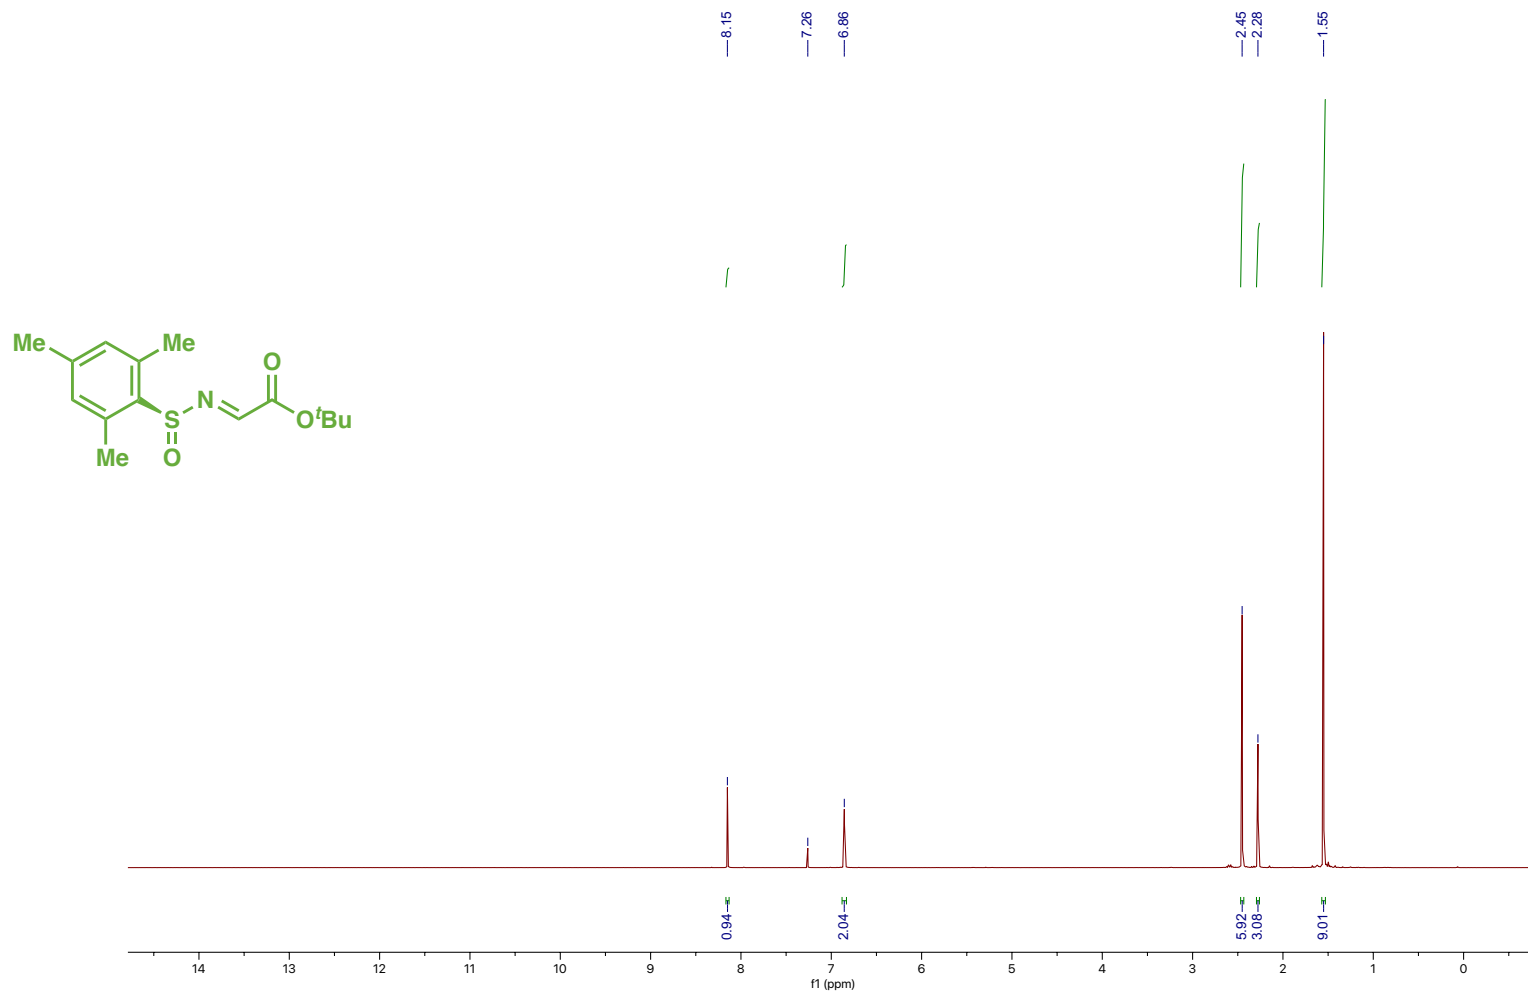

# Compound 2b <sup>13</sup>C NMR

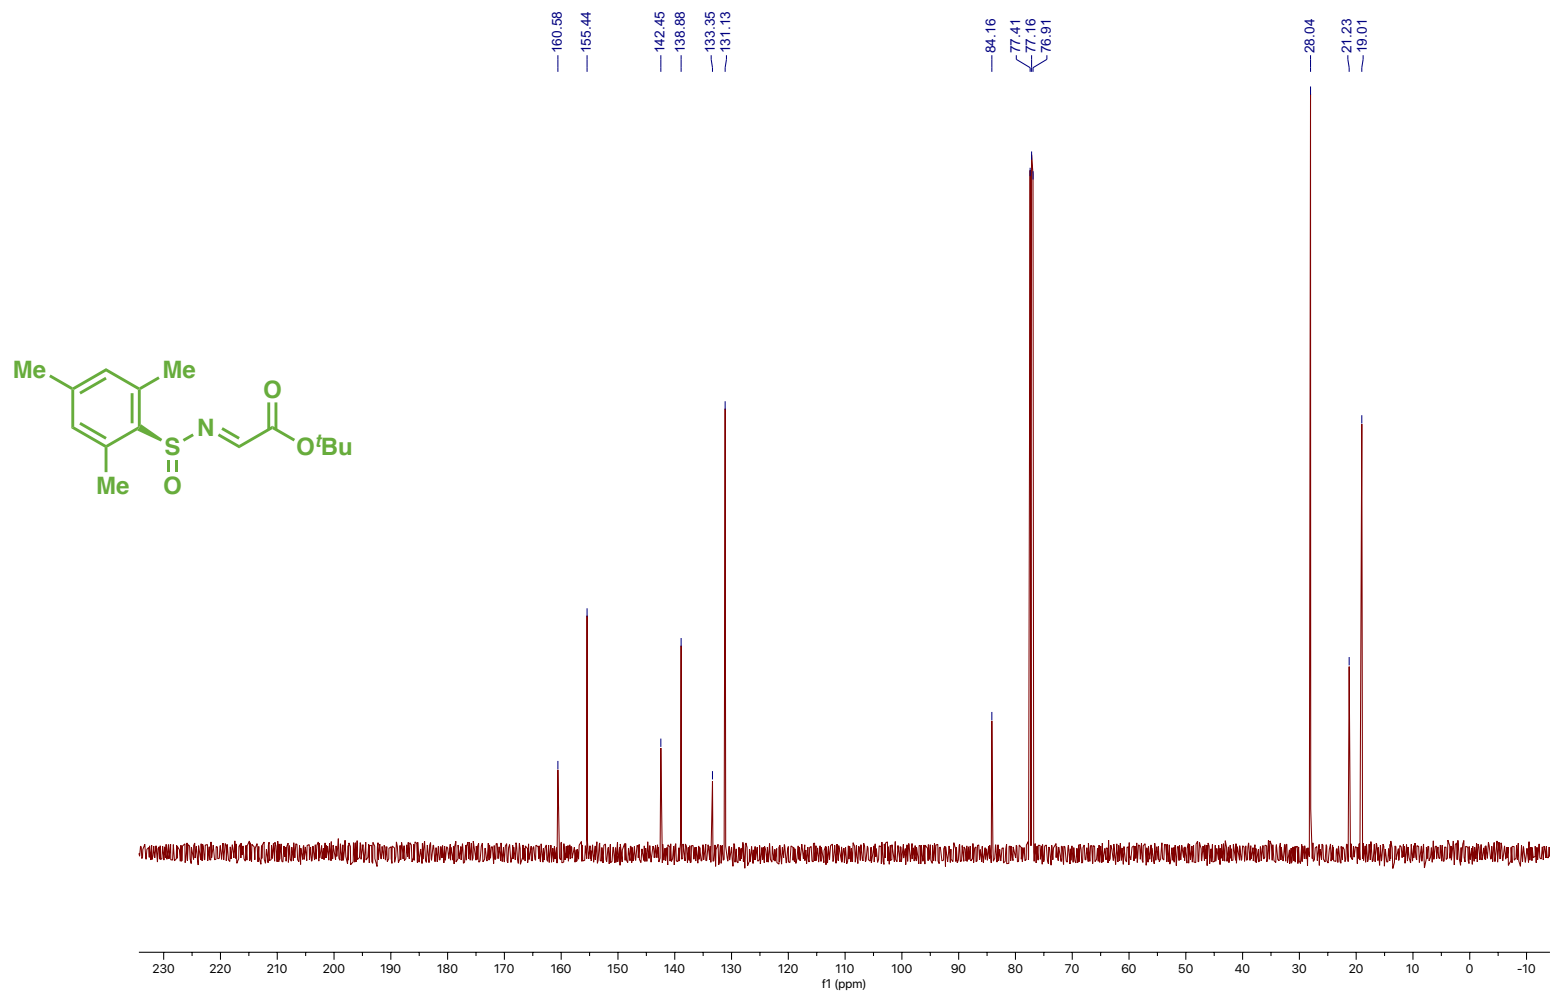



# Compound 3 <sup>13</sup>C NMR

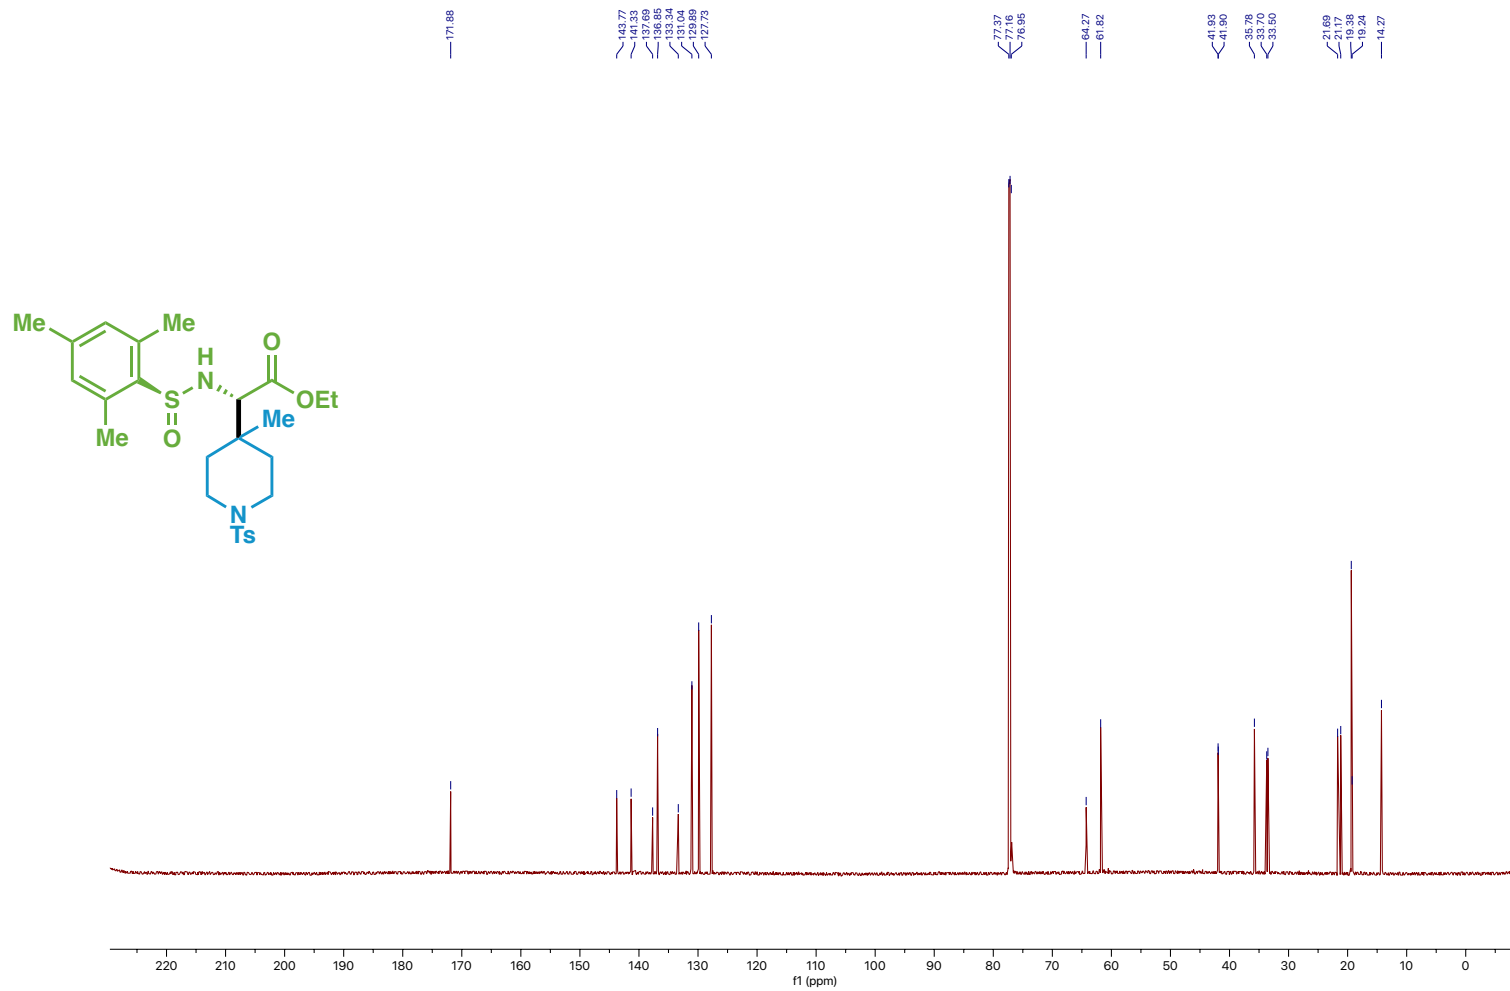

# Compound 8 <sup>1</sup>H NMR

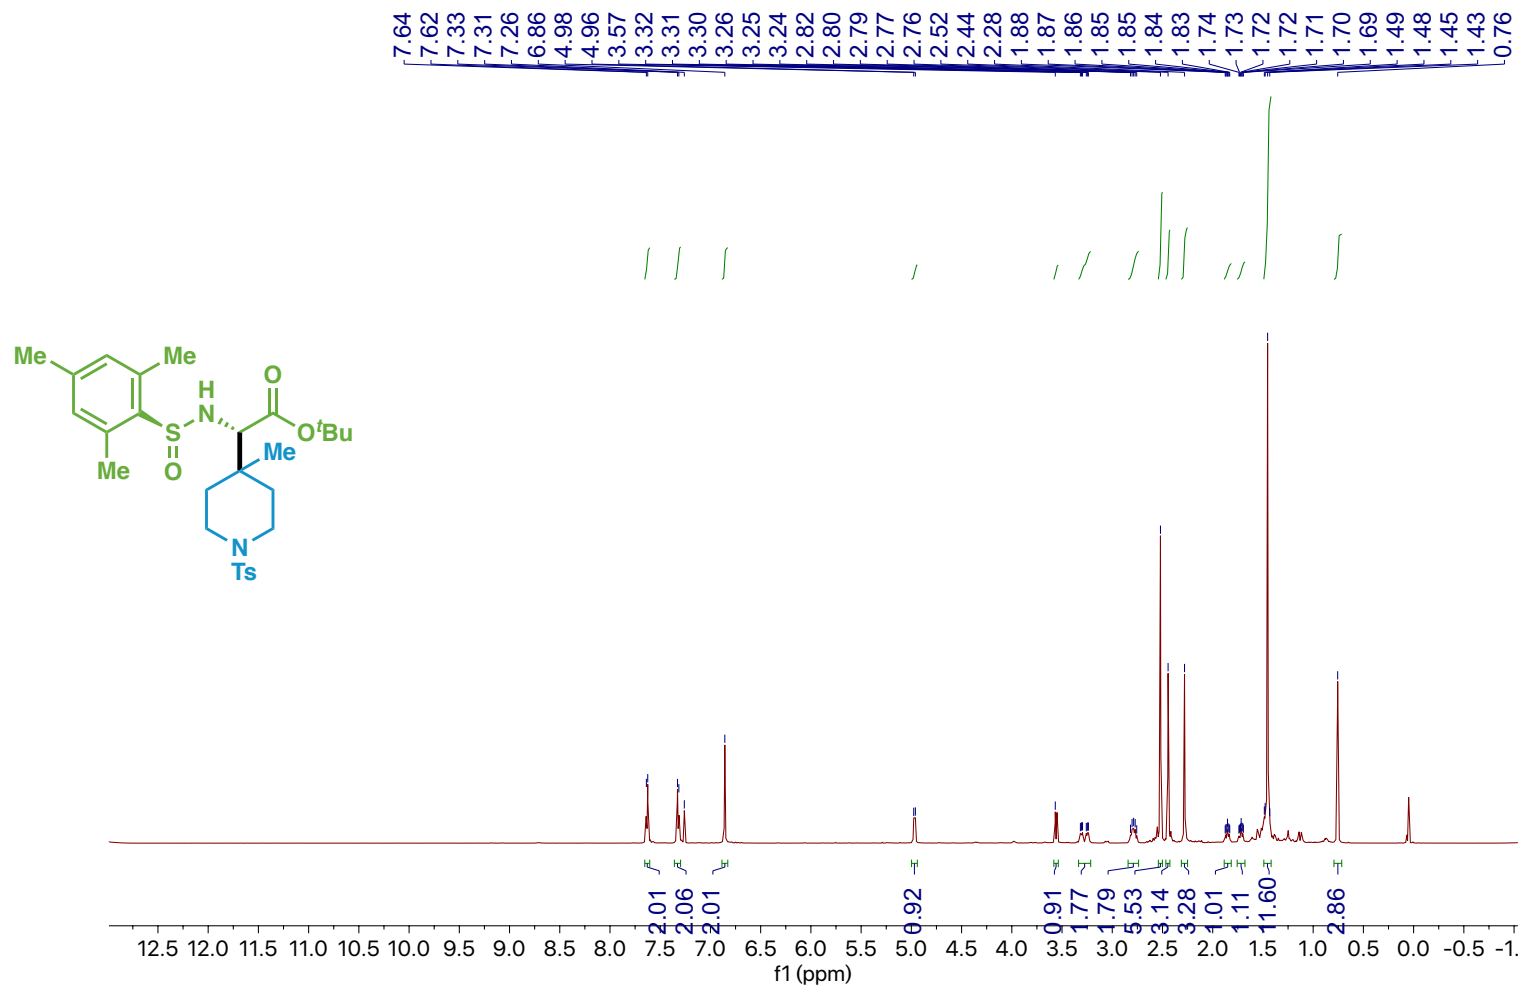



# Compound 8 <sup>13</sup>C NMR

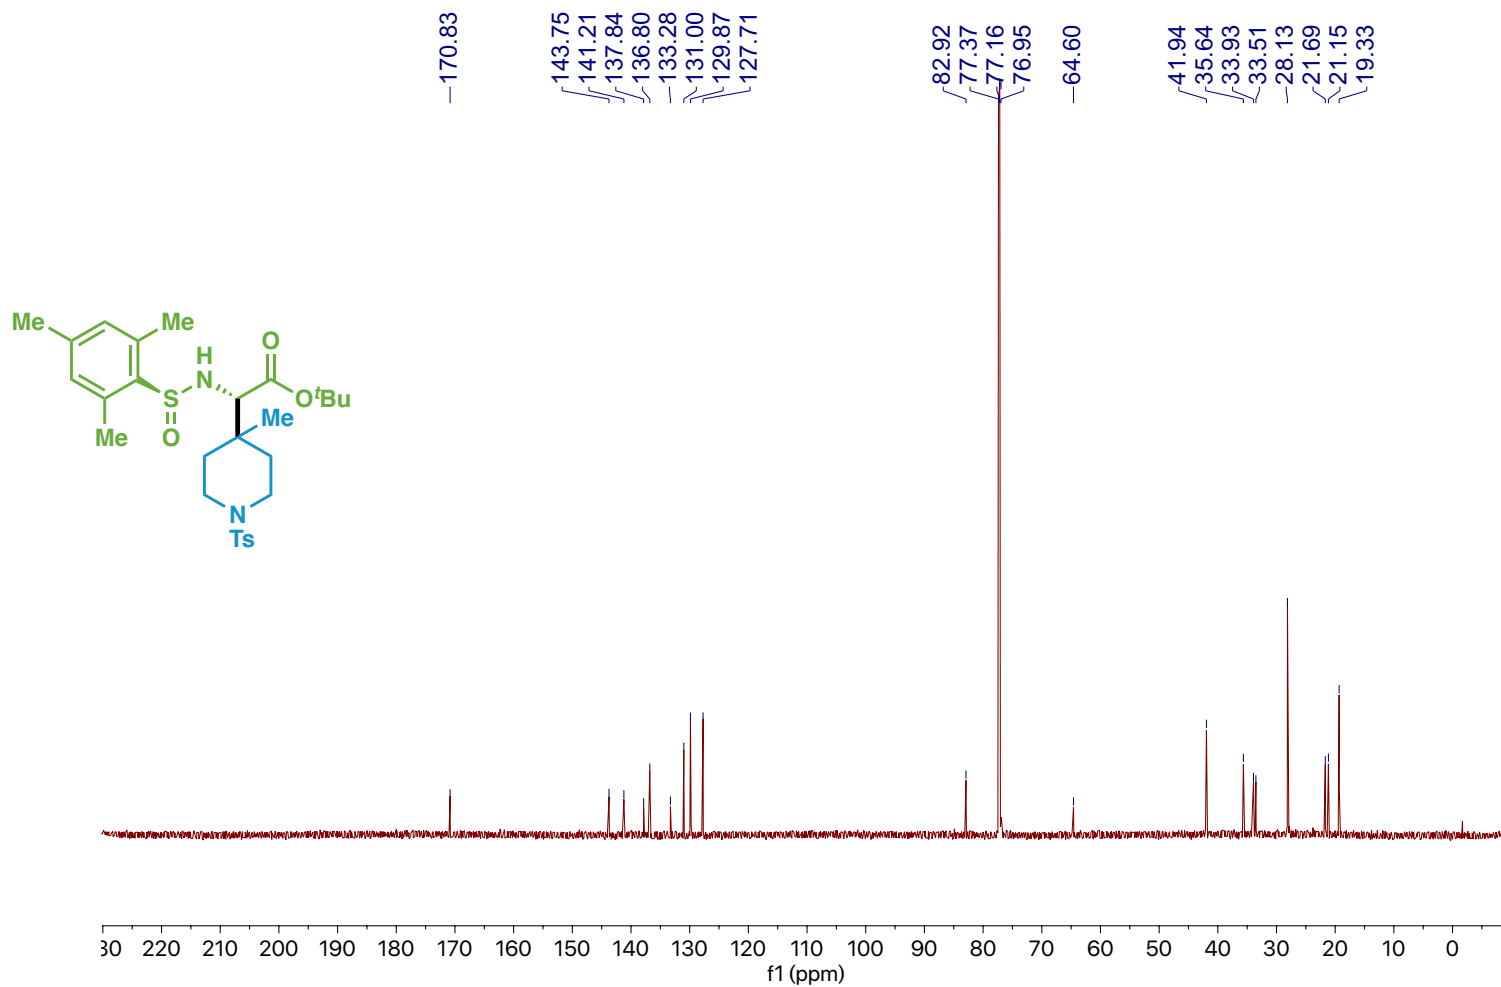

# Compound 9 <sup>1</sup>H NMR

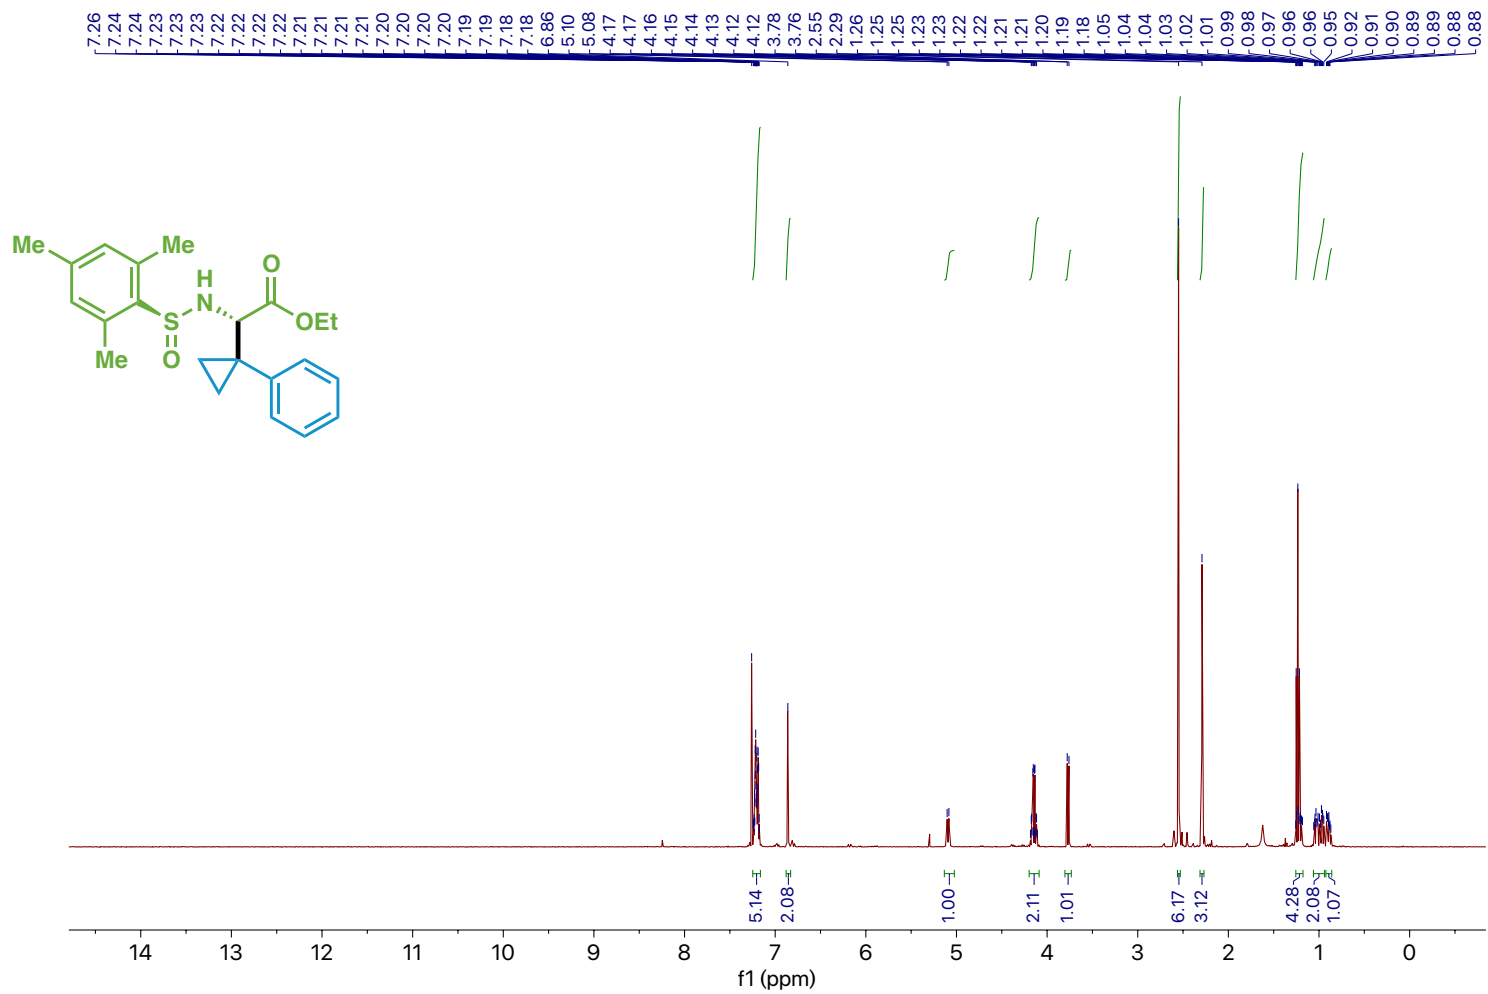

# Compound 9 <sup>13</sup>C NMR

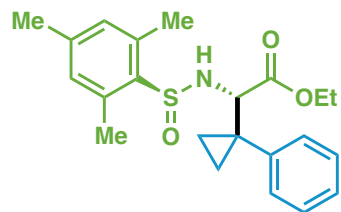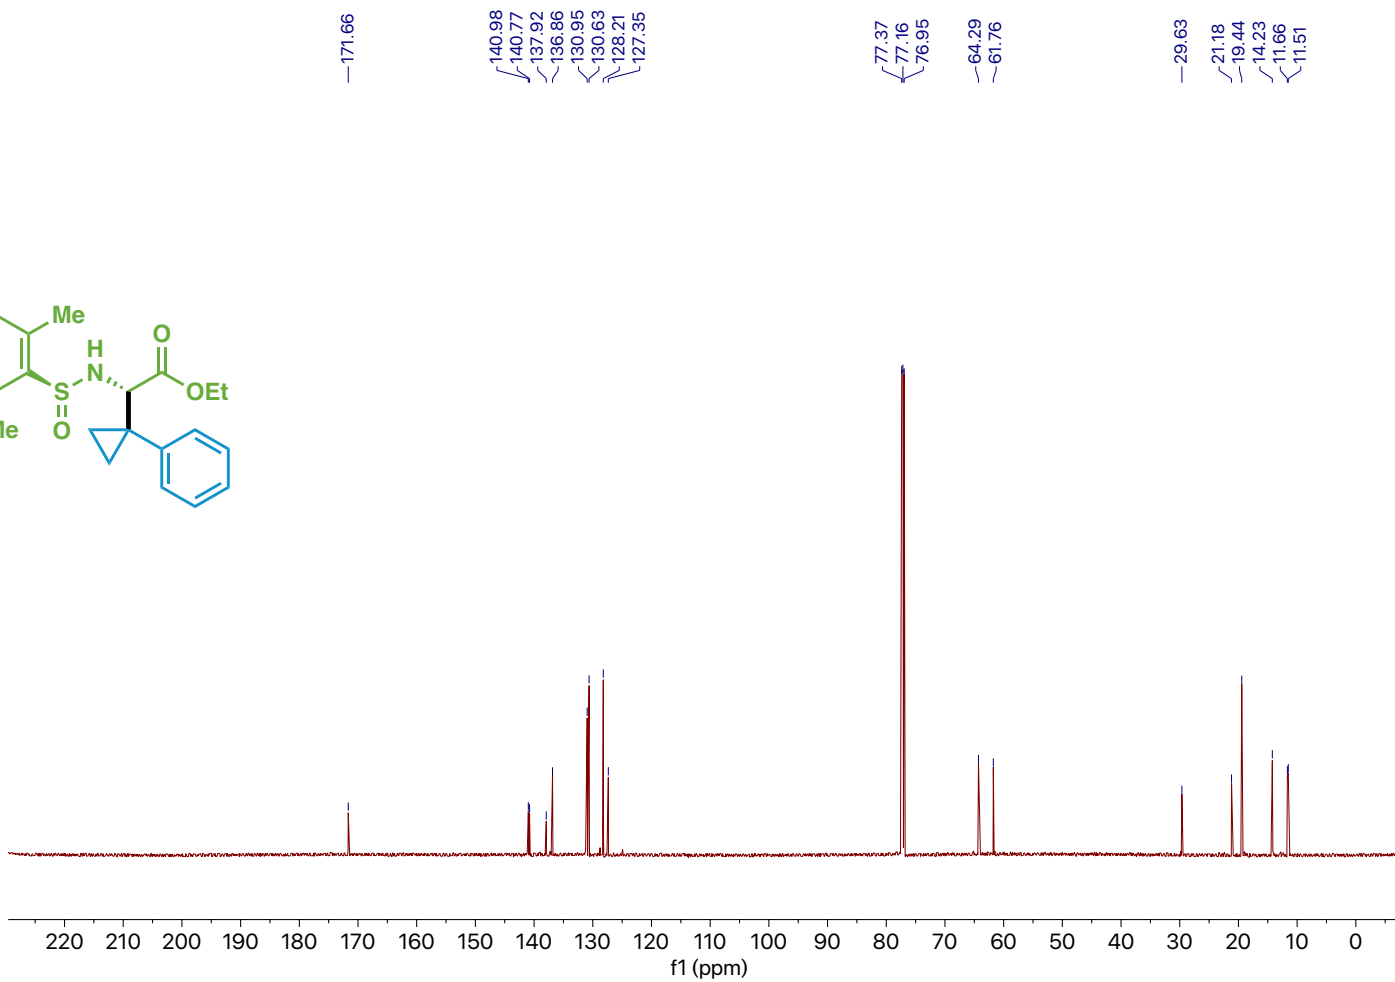

# Compound 10 <sup>1</sup>H NMR

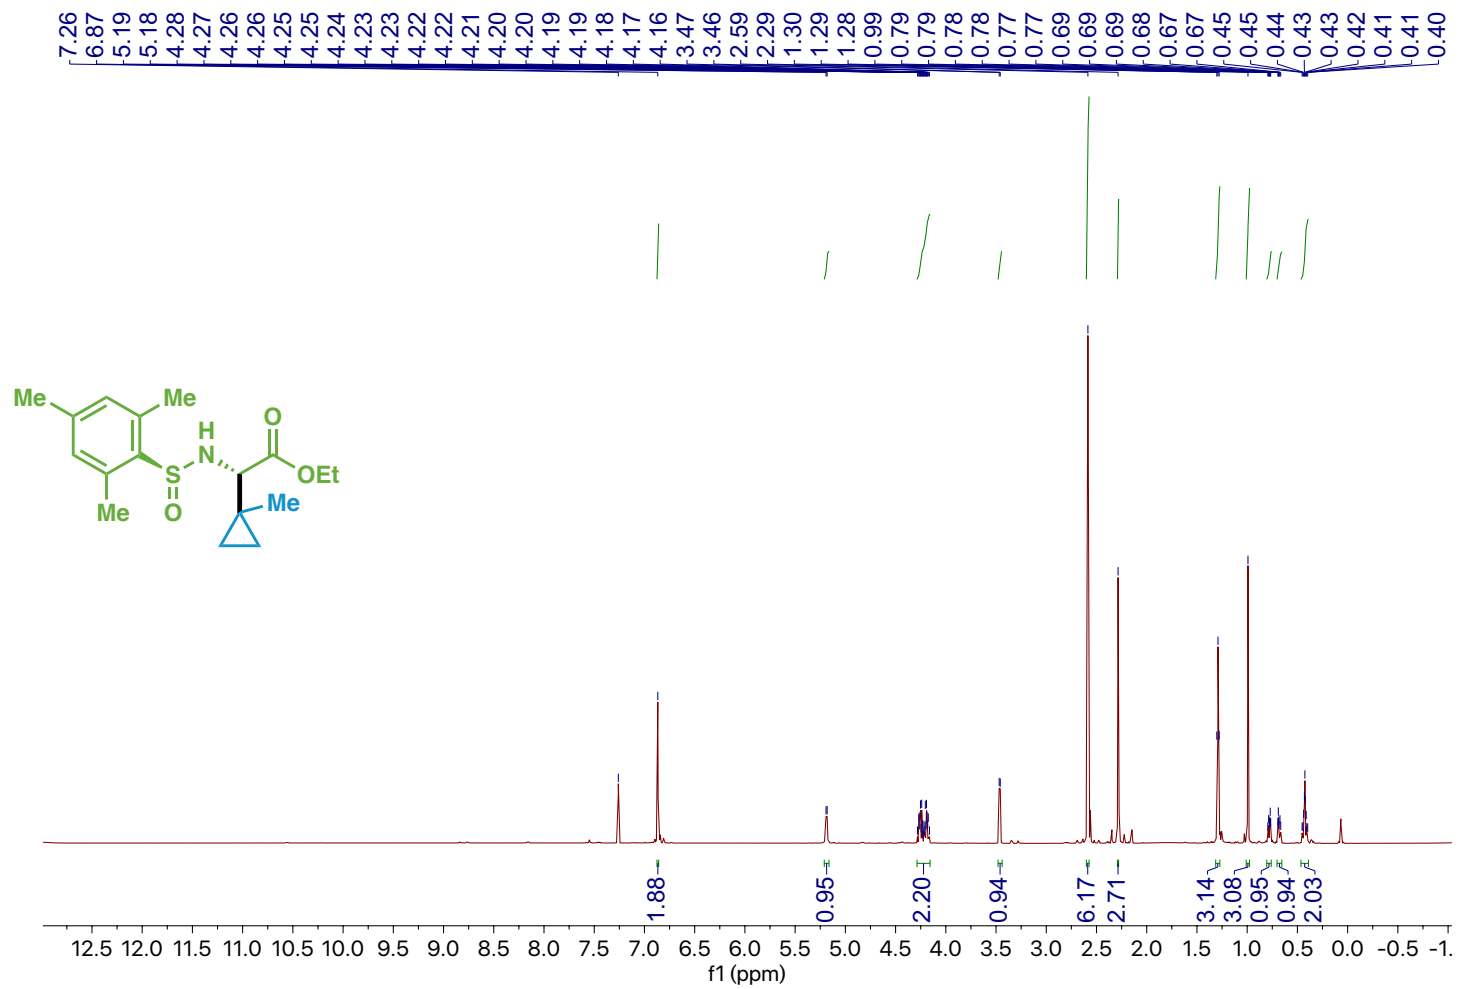

# Compound 10 <sup>13</sup>C NMR

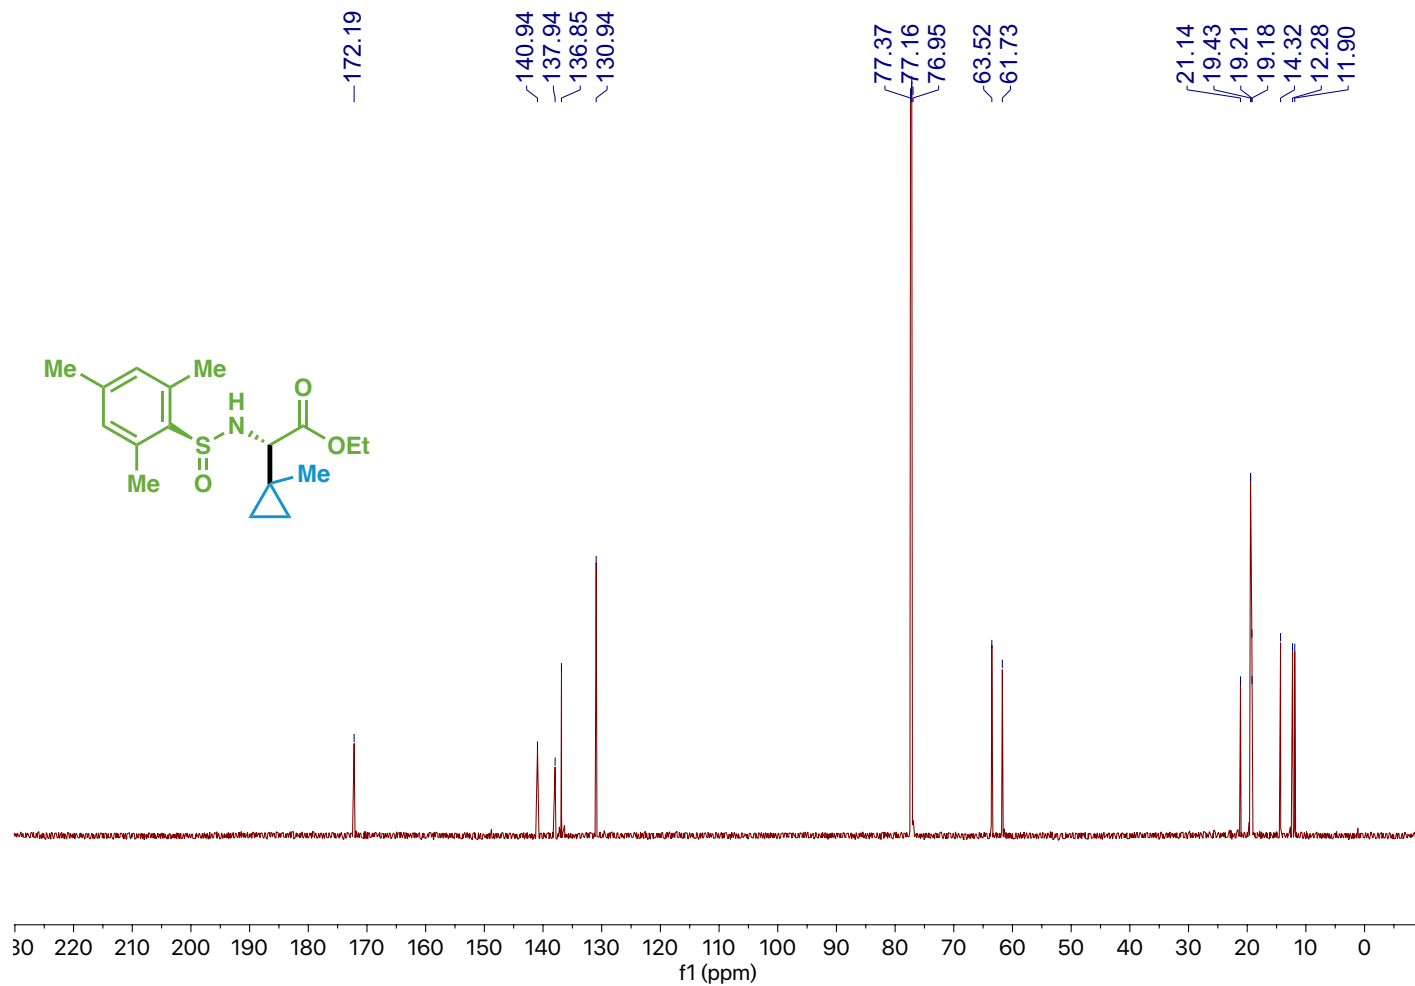

# Compound 11 <sup>1</sup>H NMR

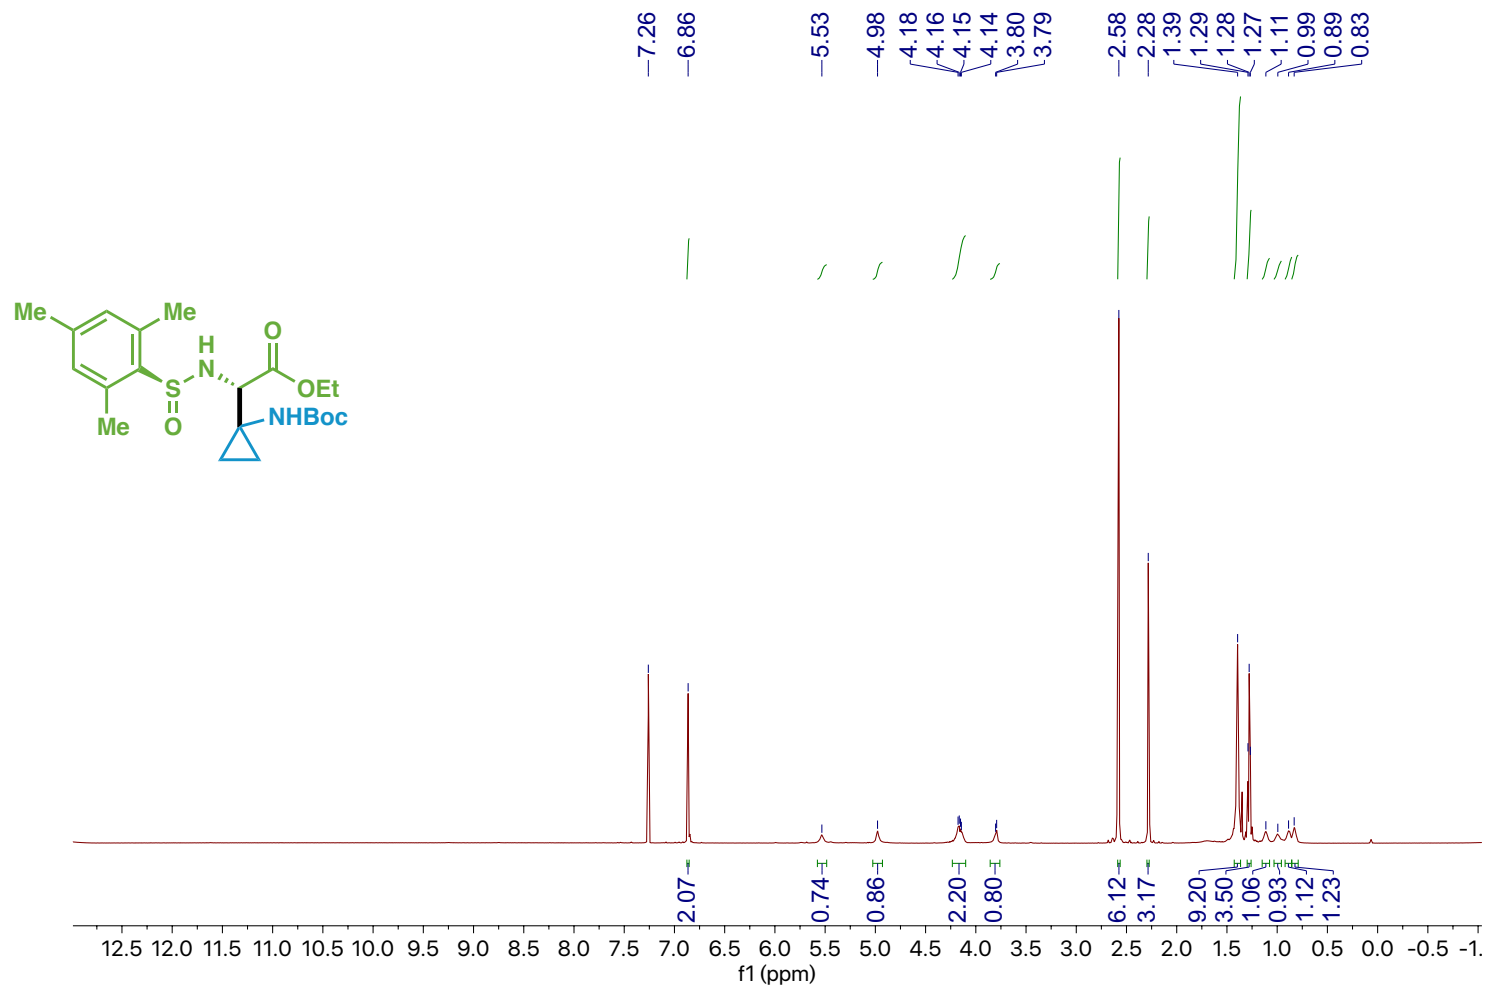

# Compound 11 <sup>13</sup>C NMR

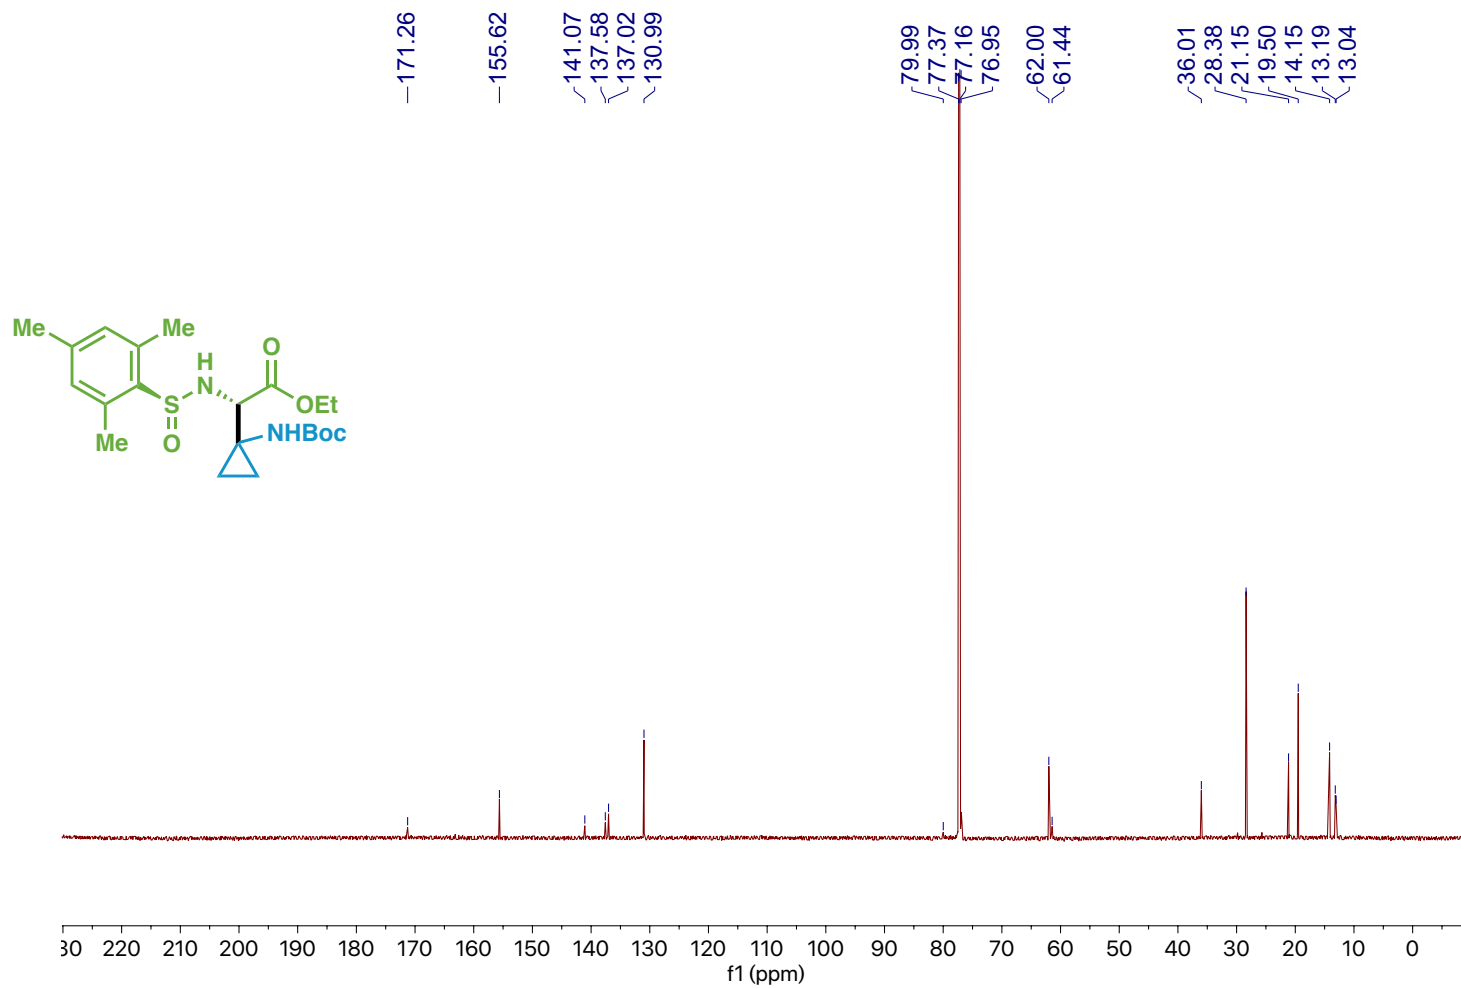

# Compound 12 <sup>1</sup>H NMR

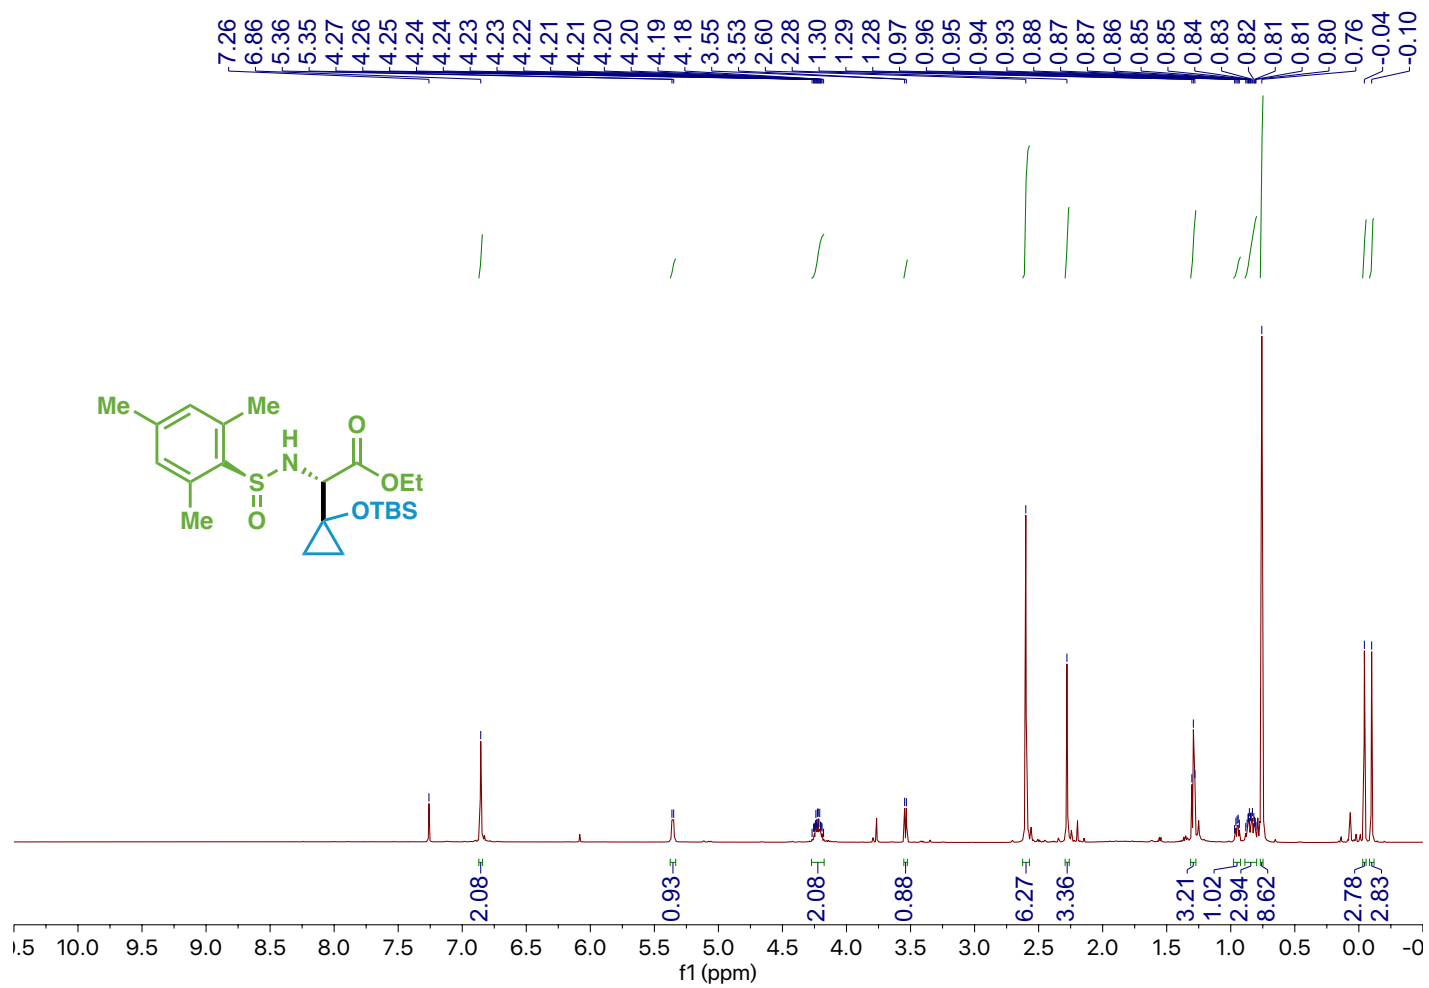



# Compound 12 <sup>13</sup>C NMR

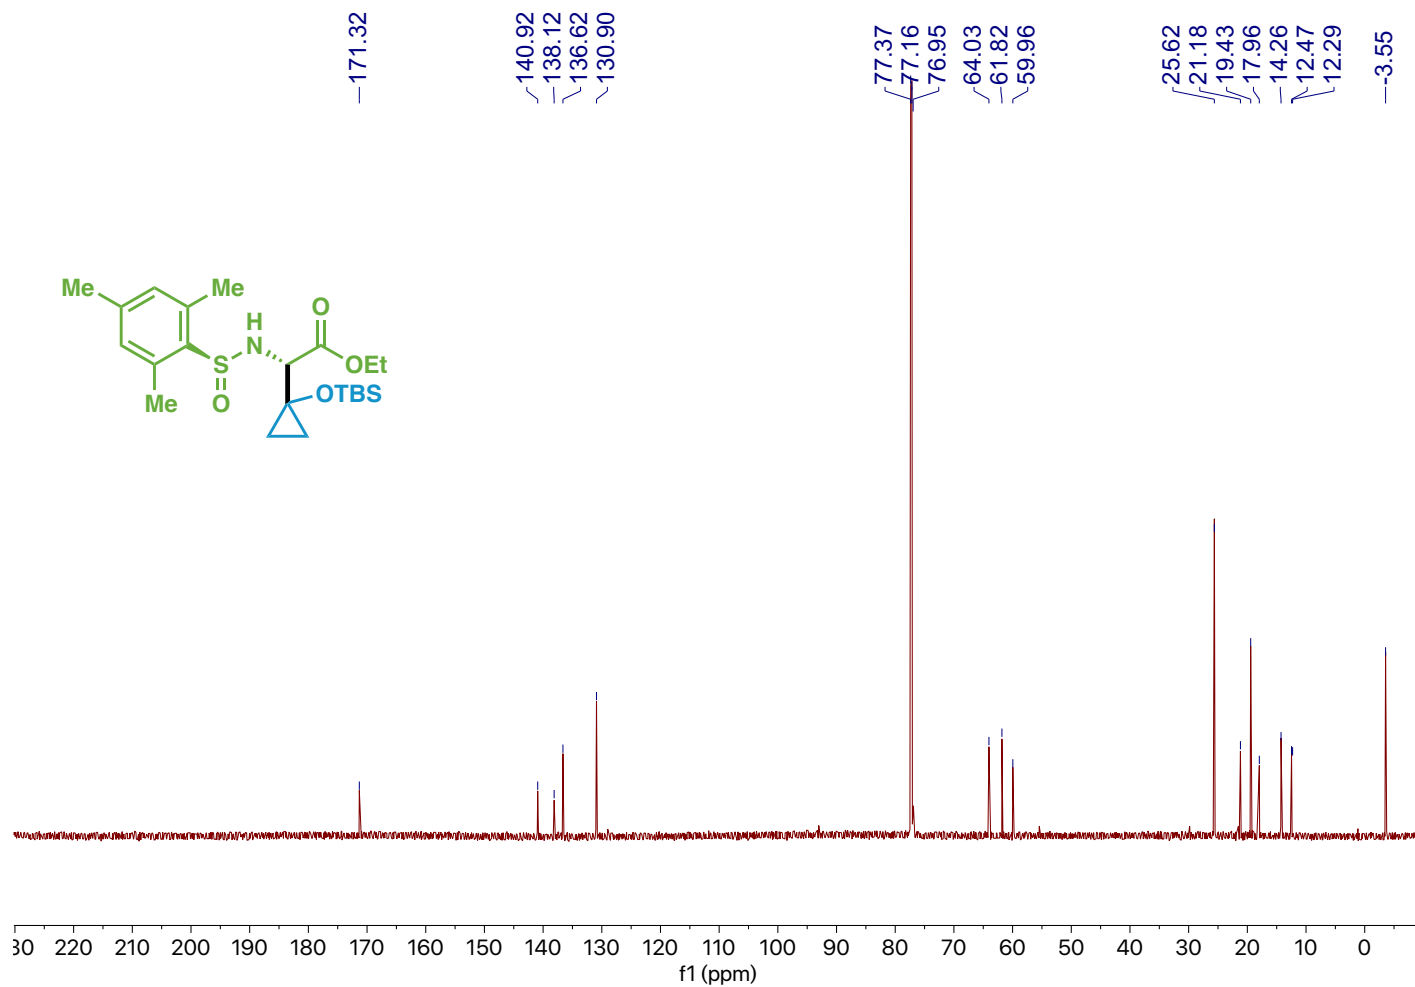

# Compound 13 <sup>1</sup>H NMR

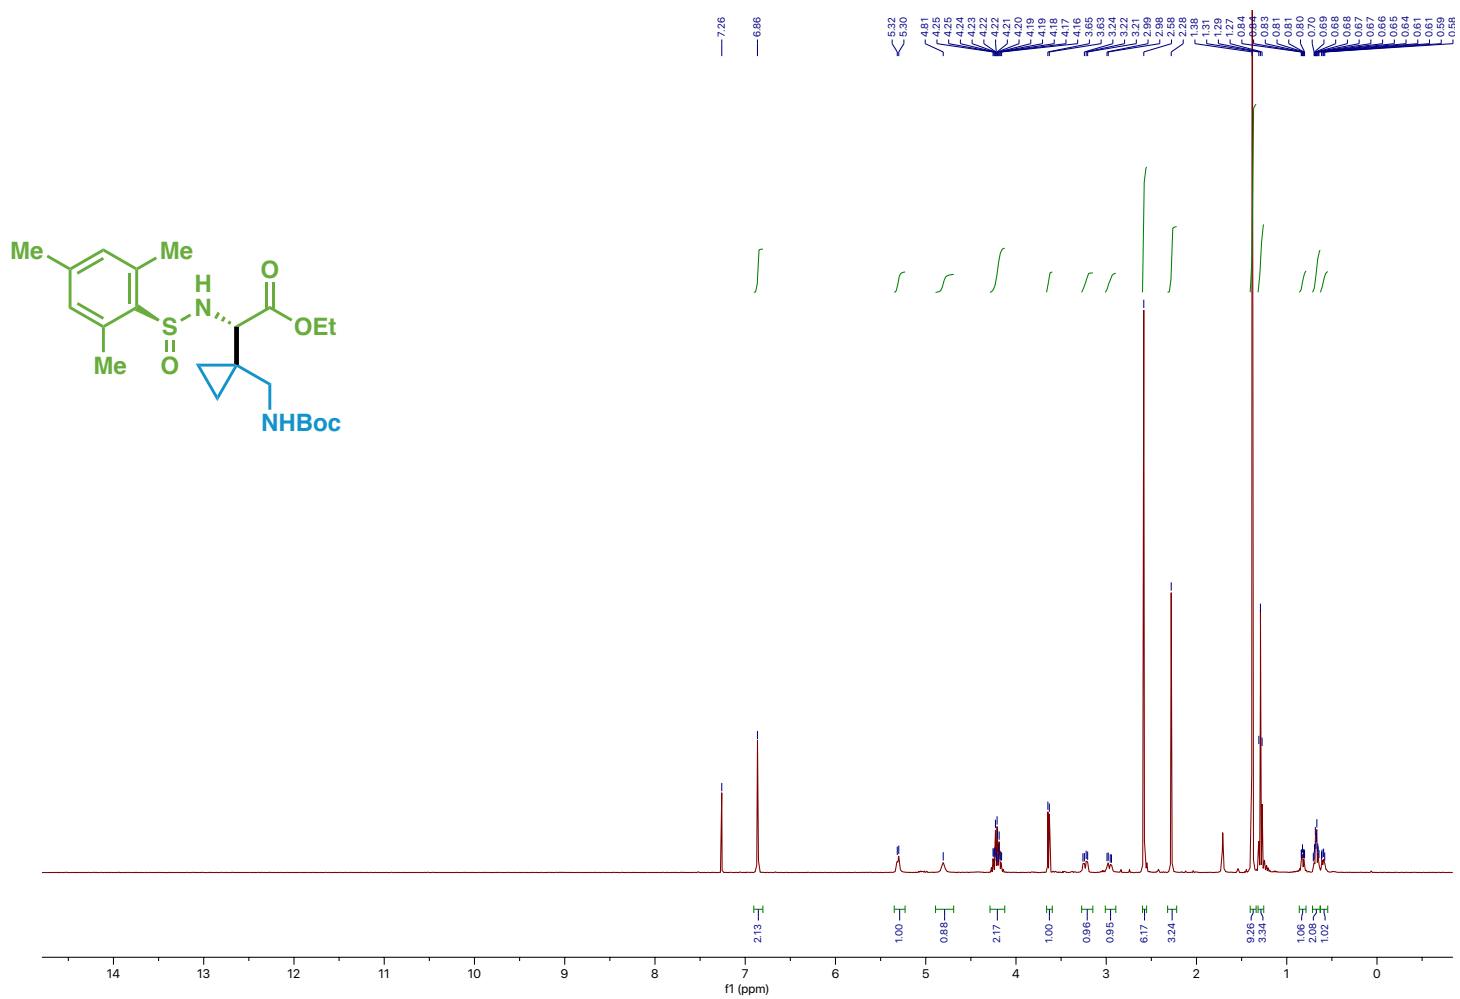

# Compound 13 <sup>13</sup>C NMR

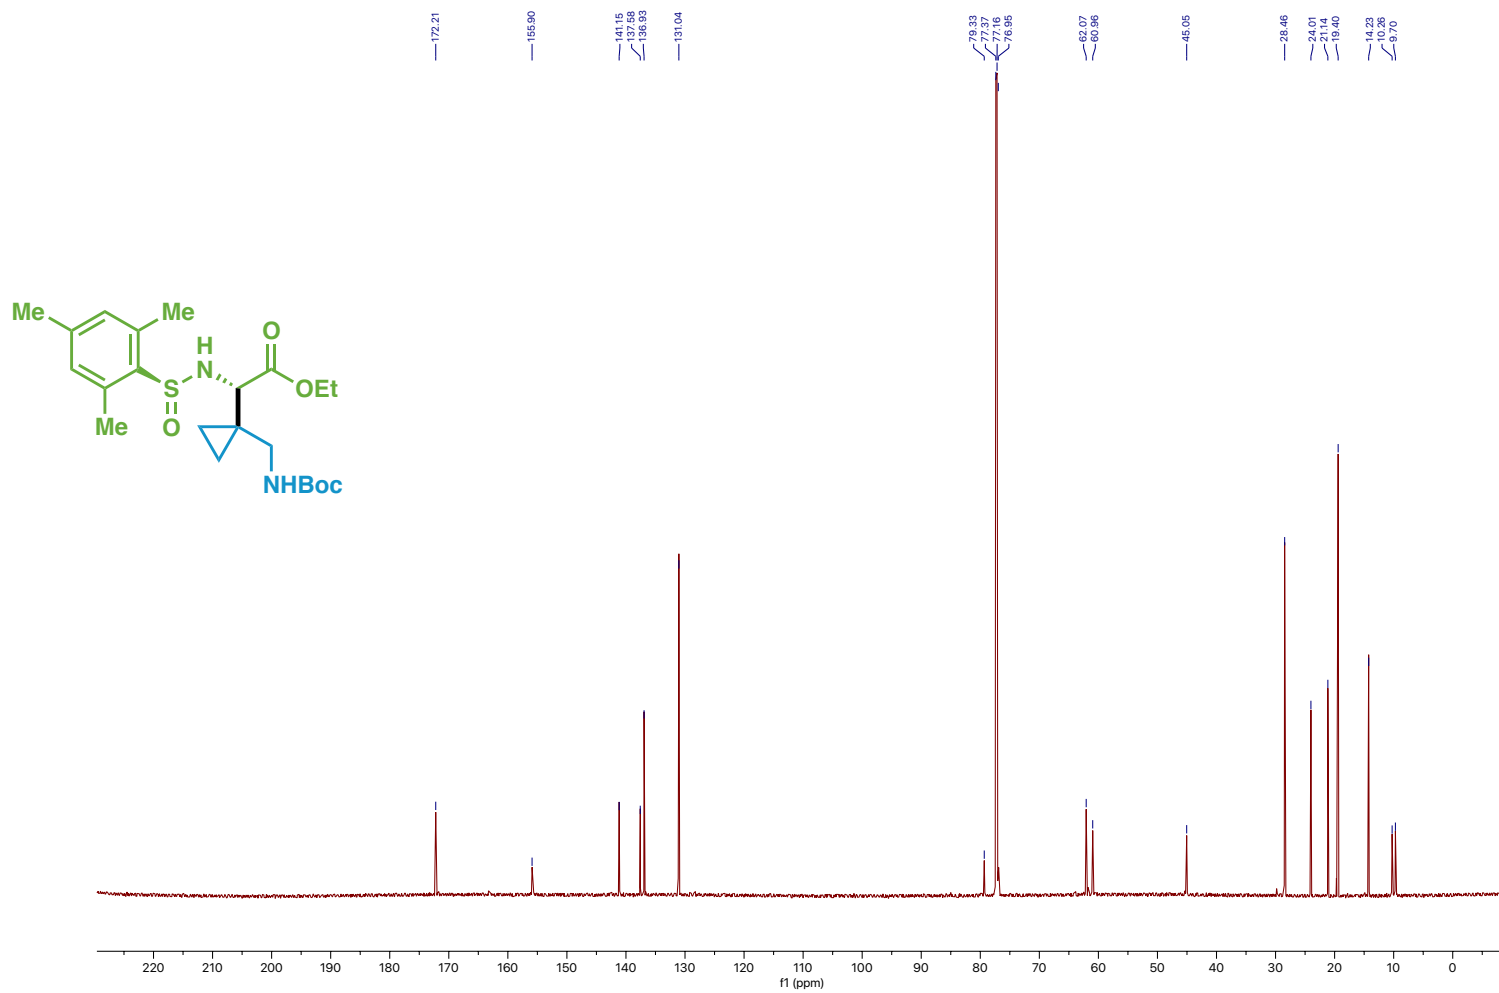

# Compound 14 <sup>1</sup>H NMR

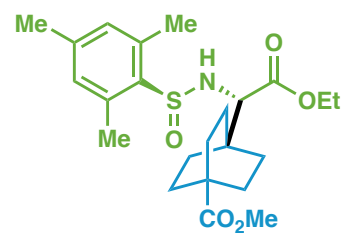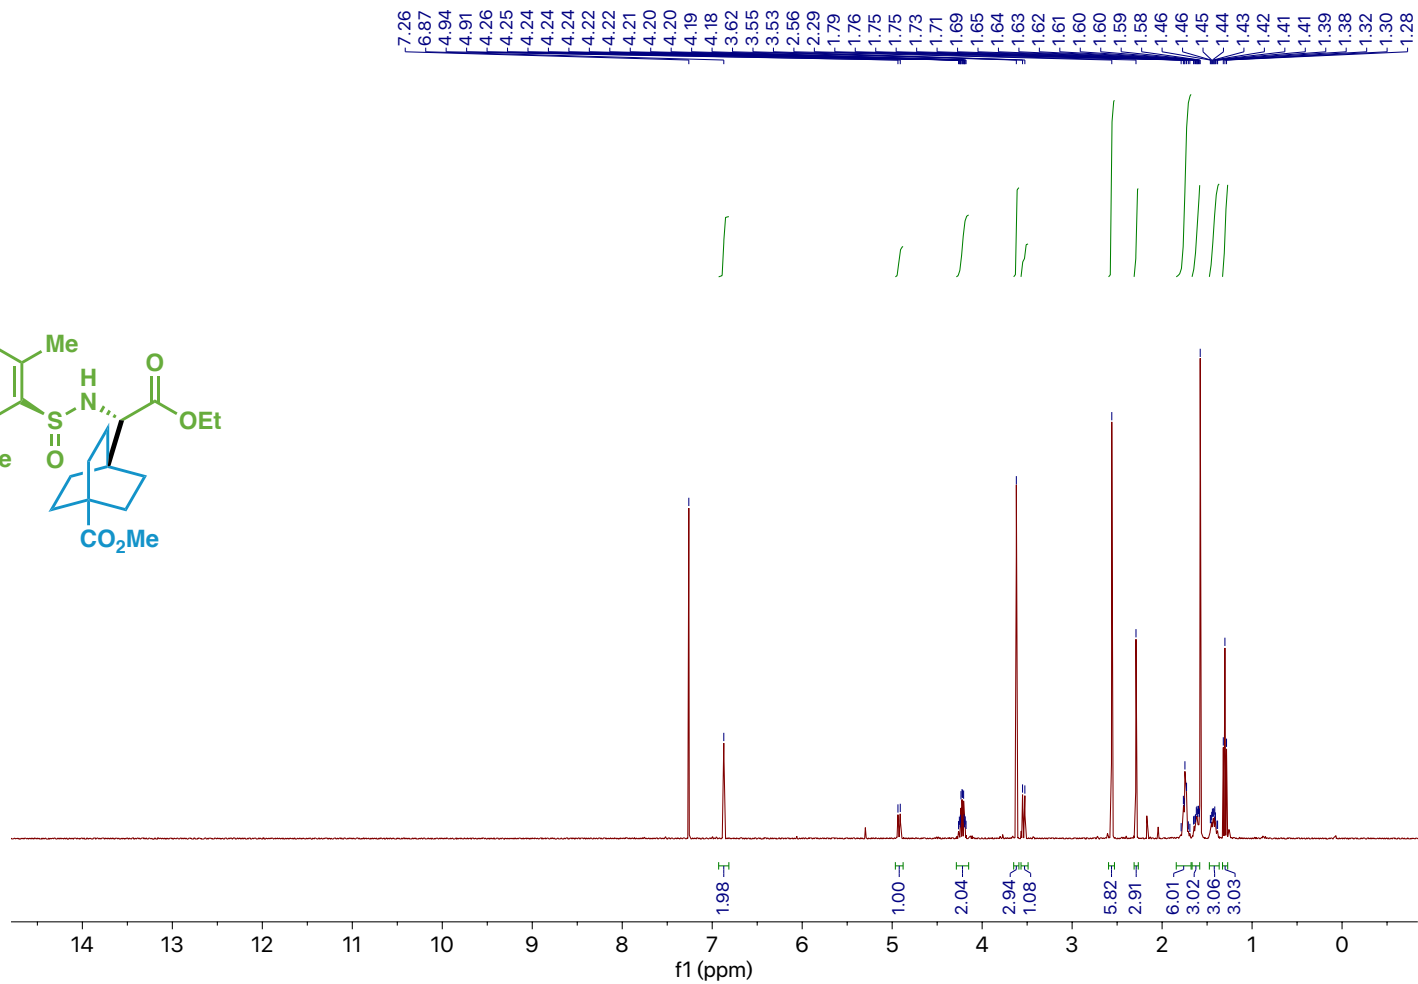

# Compound 14 <sup>13</sup>C NMR

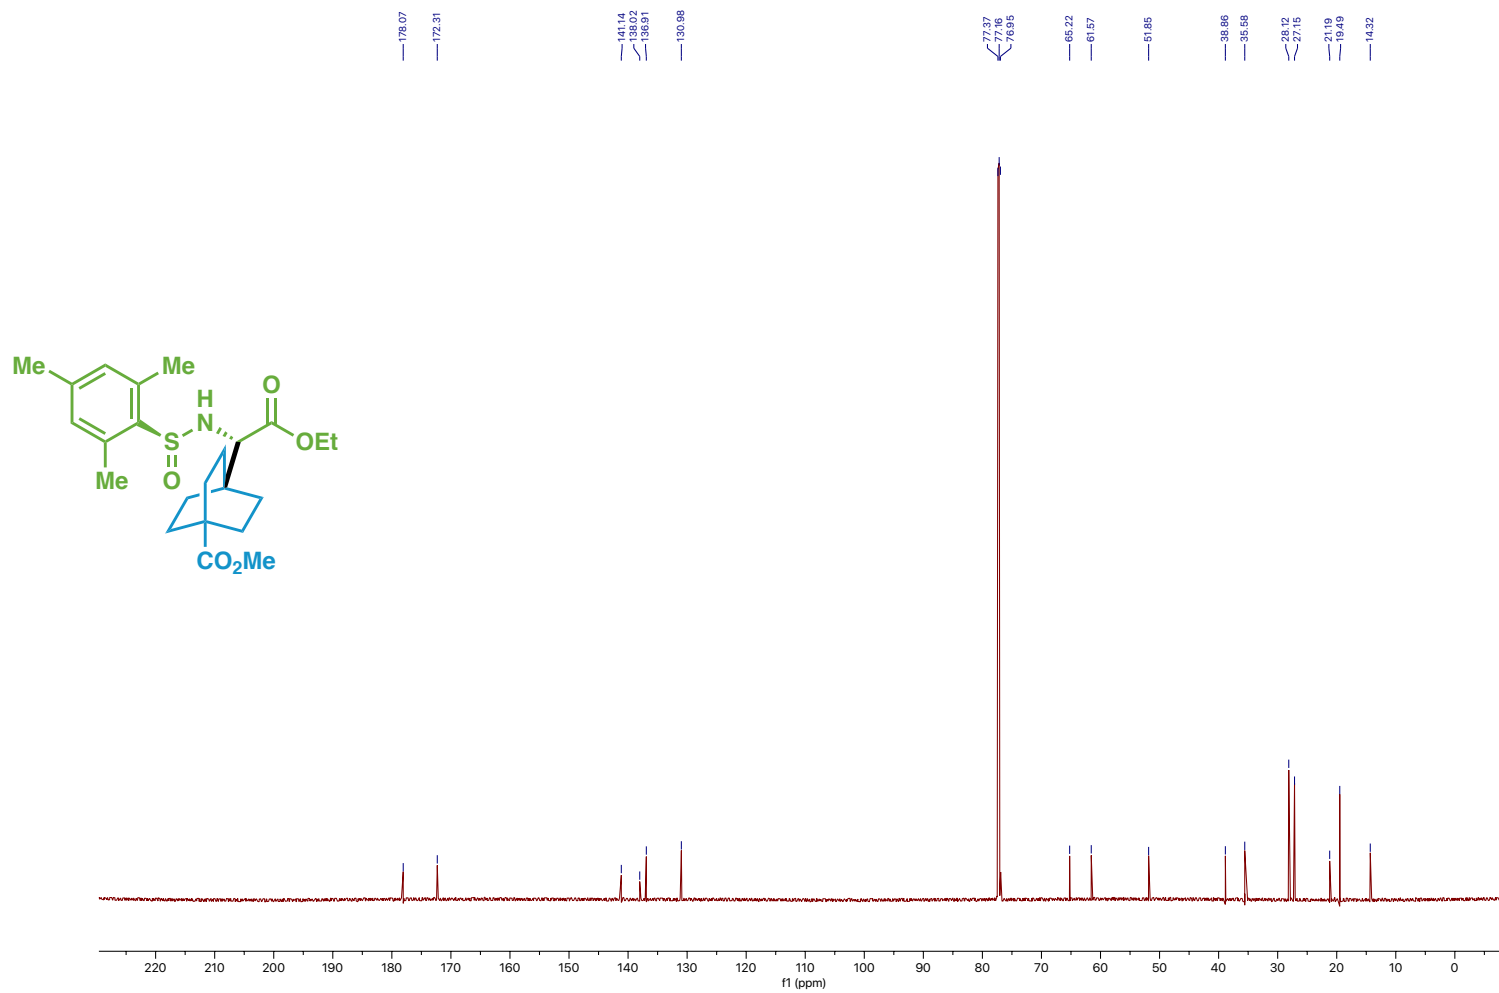

# Compound 15 <sup>1</sup>H NMR

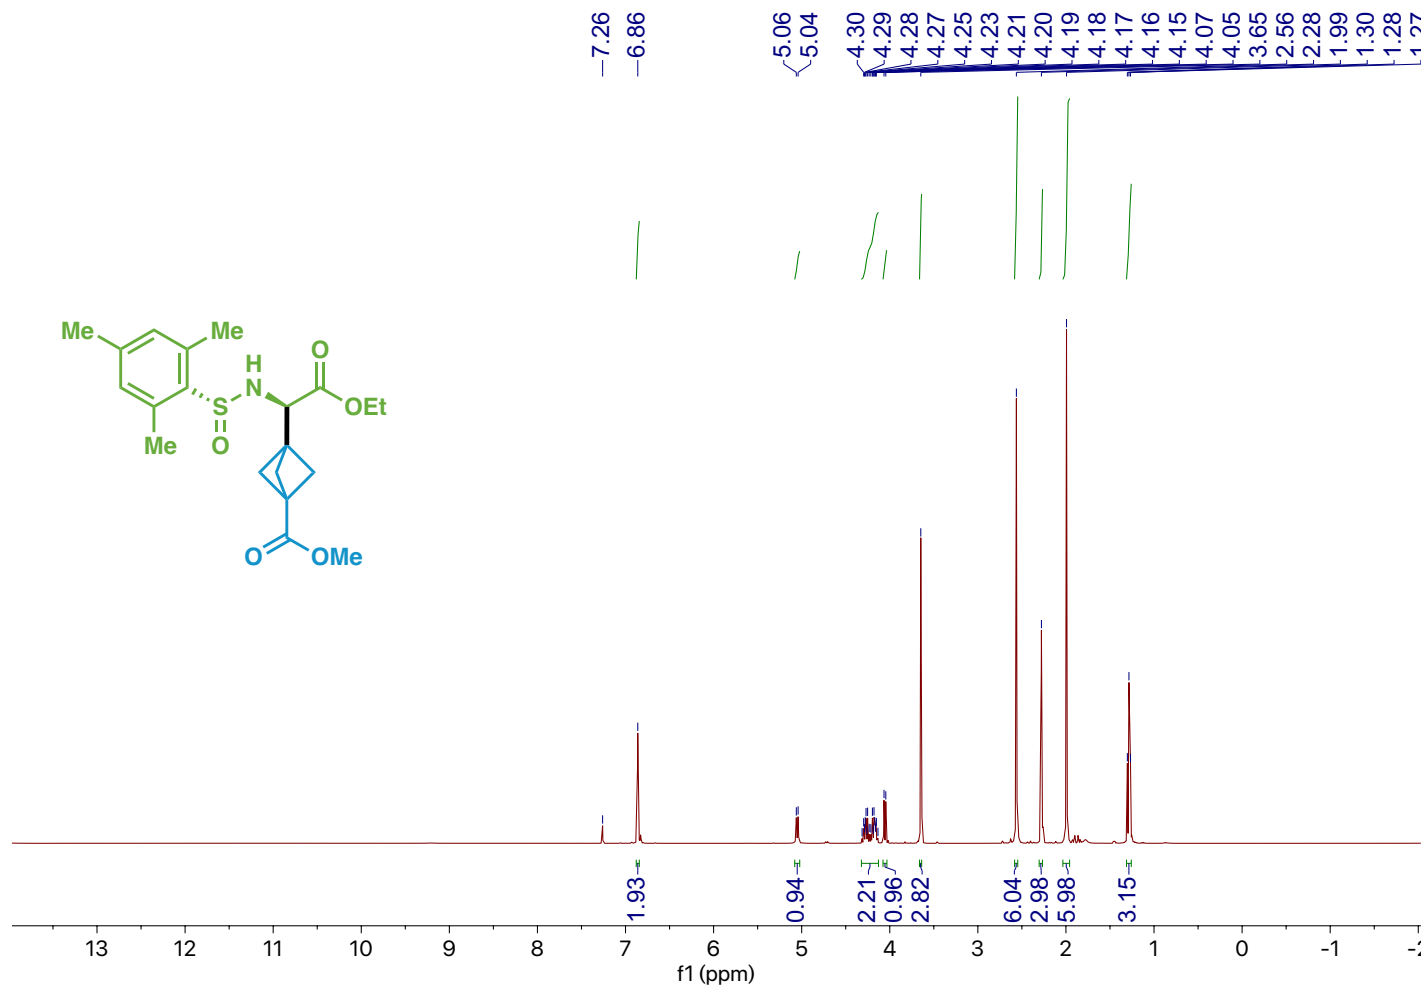

# Compound 15 <sup>13</sup>C NMR

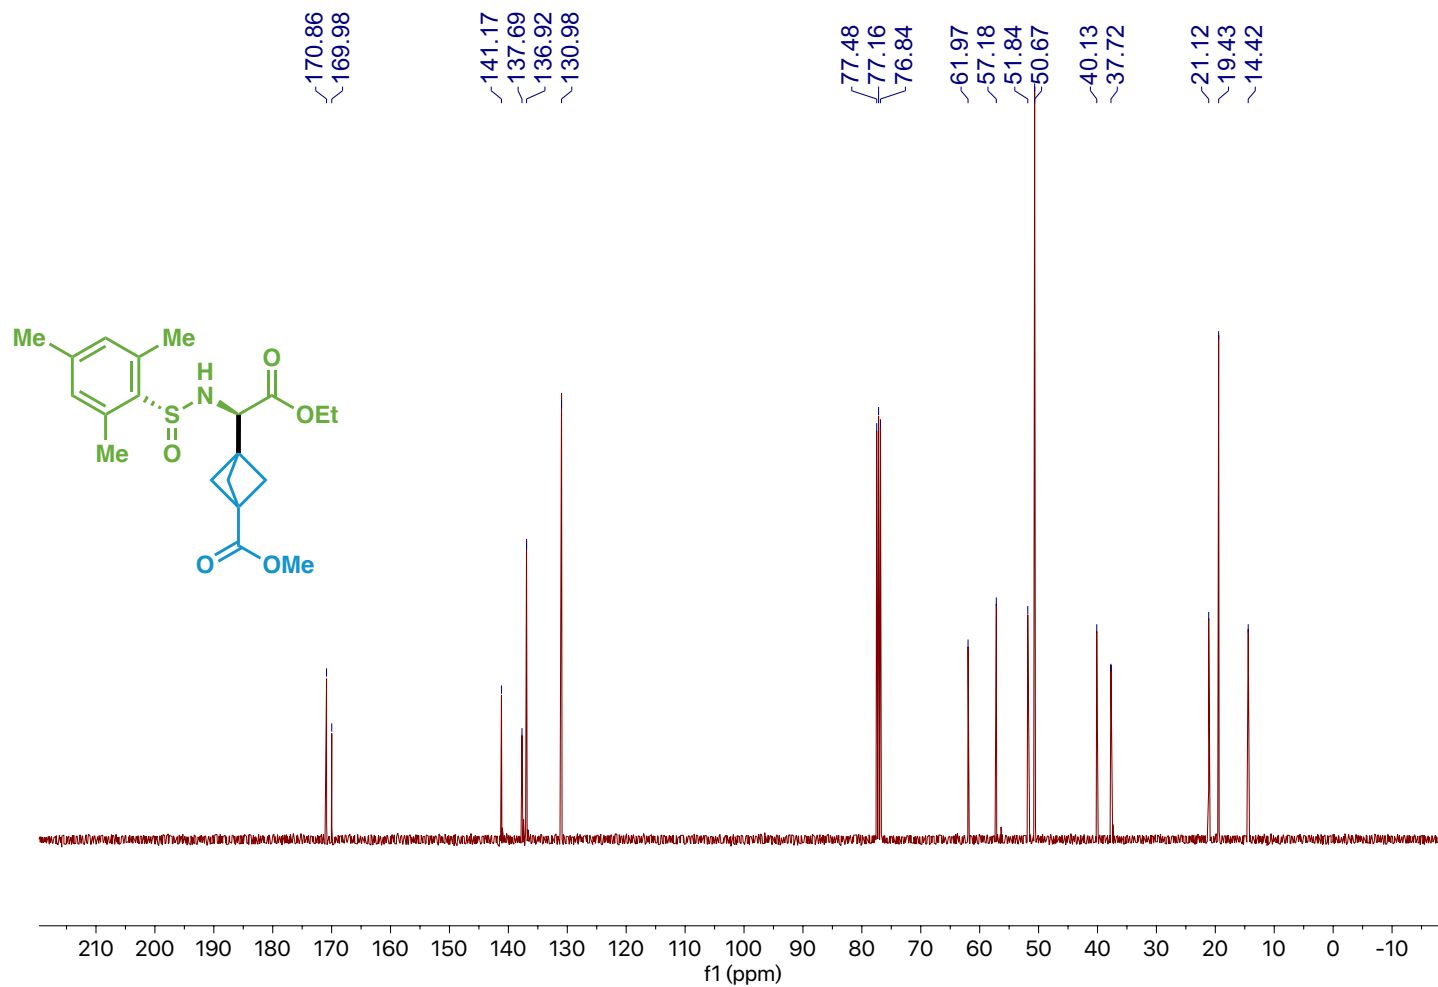





# Compound 16 <sup>13</sup>C NMR

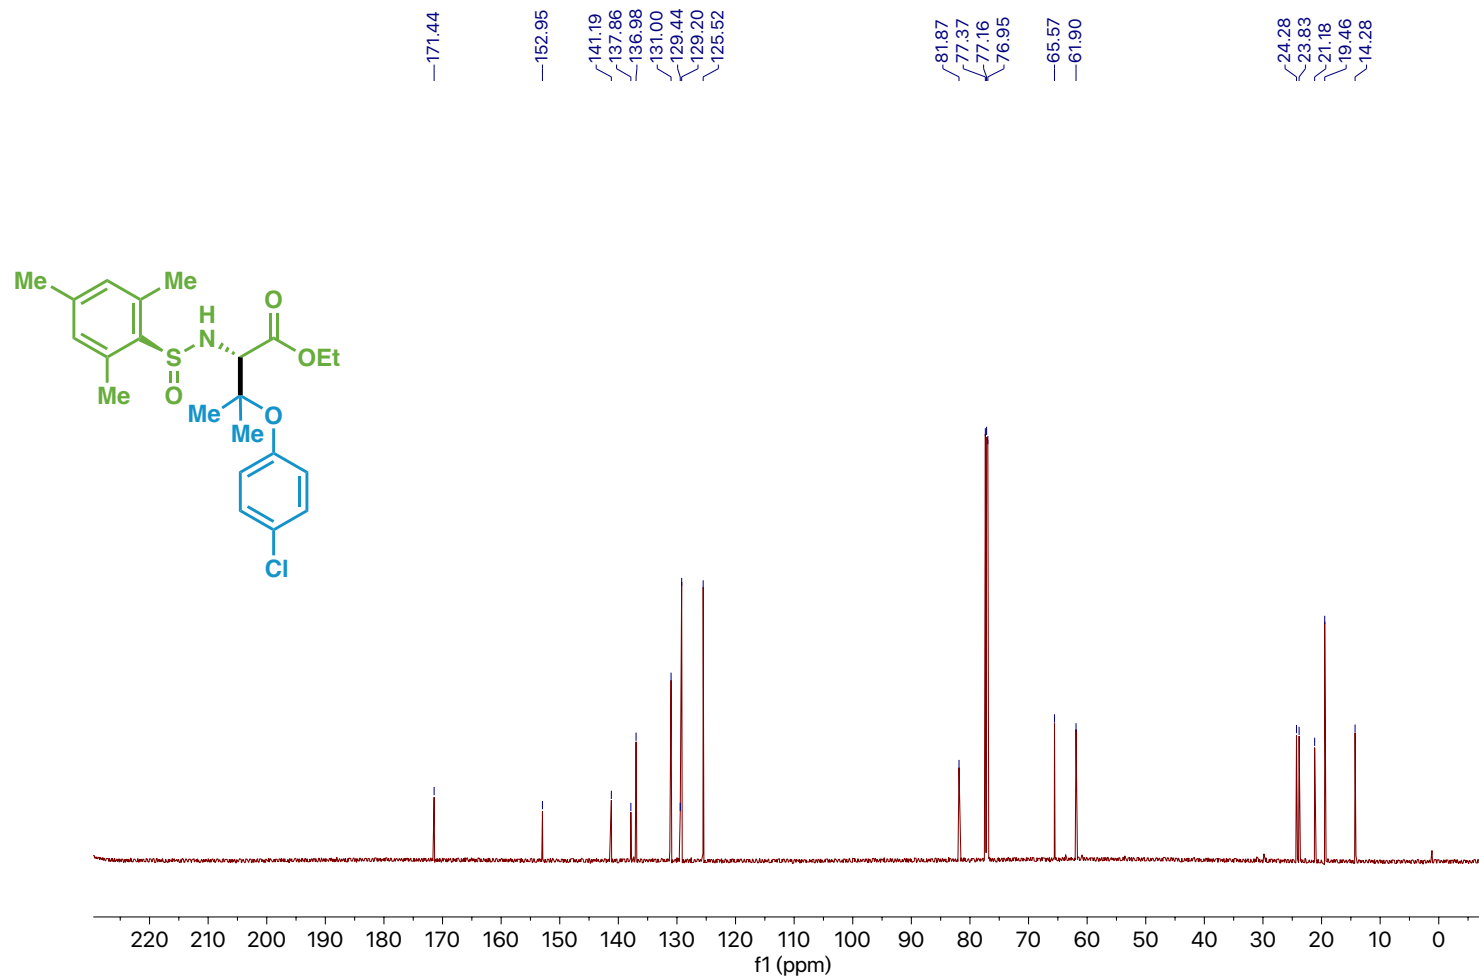

# Compound 17 <sup>1</sup>H NMR

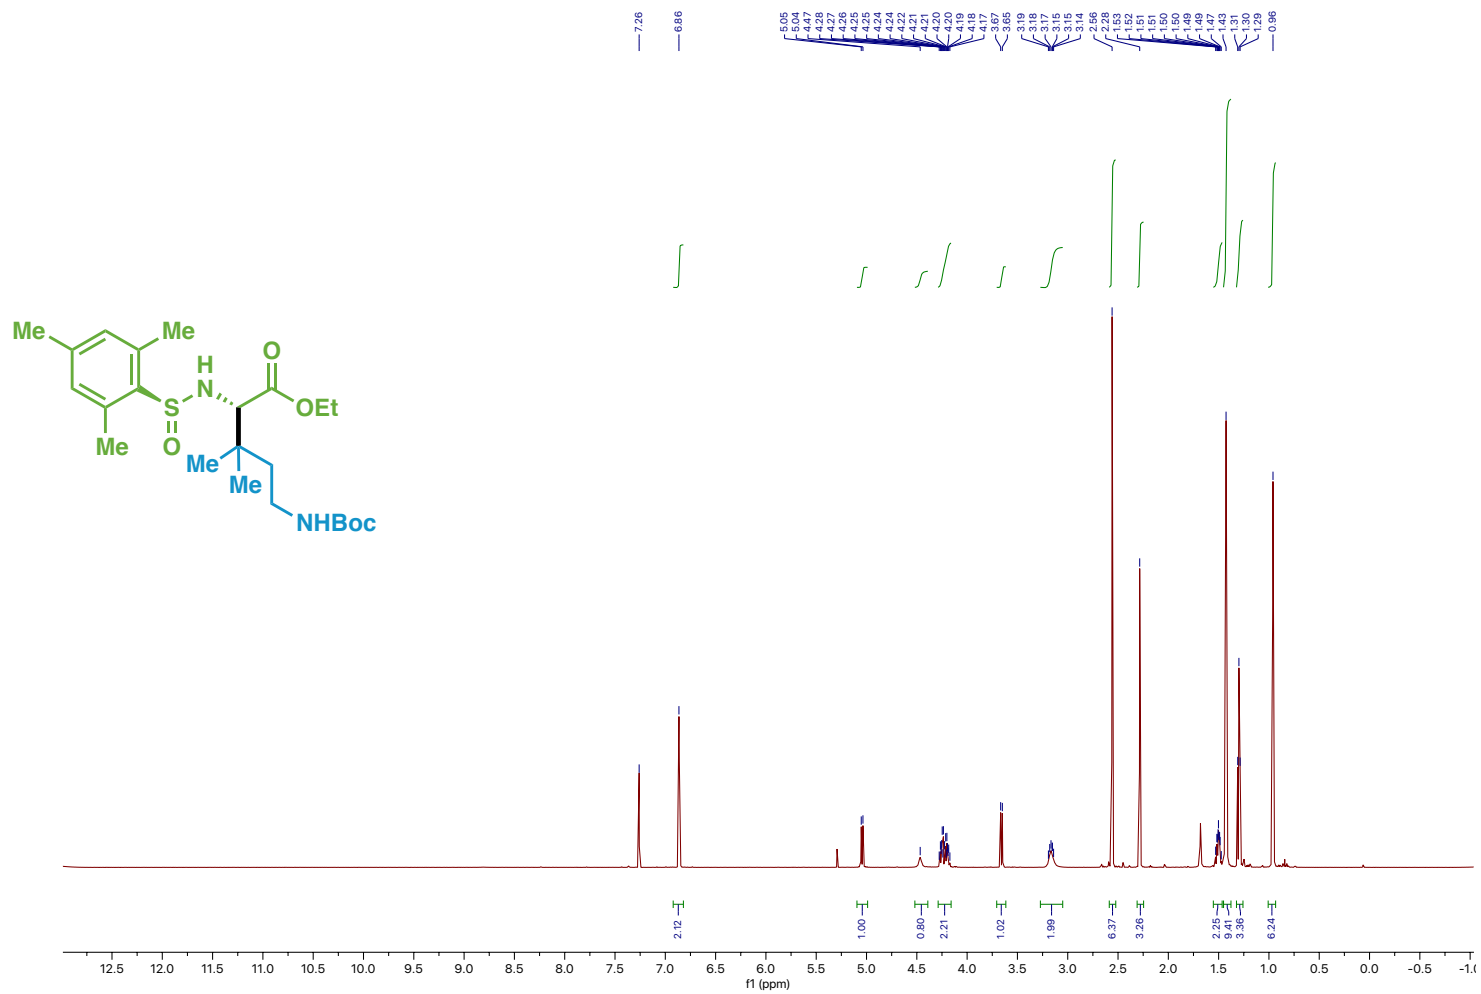

# Compound 17 <sup>13</sup>C NMR

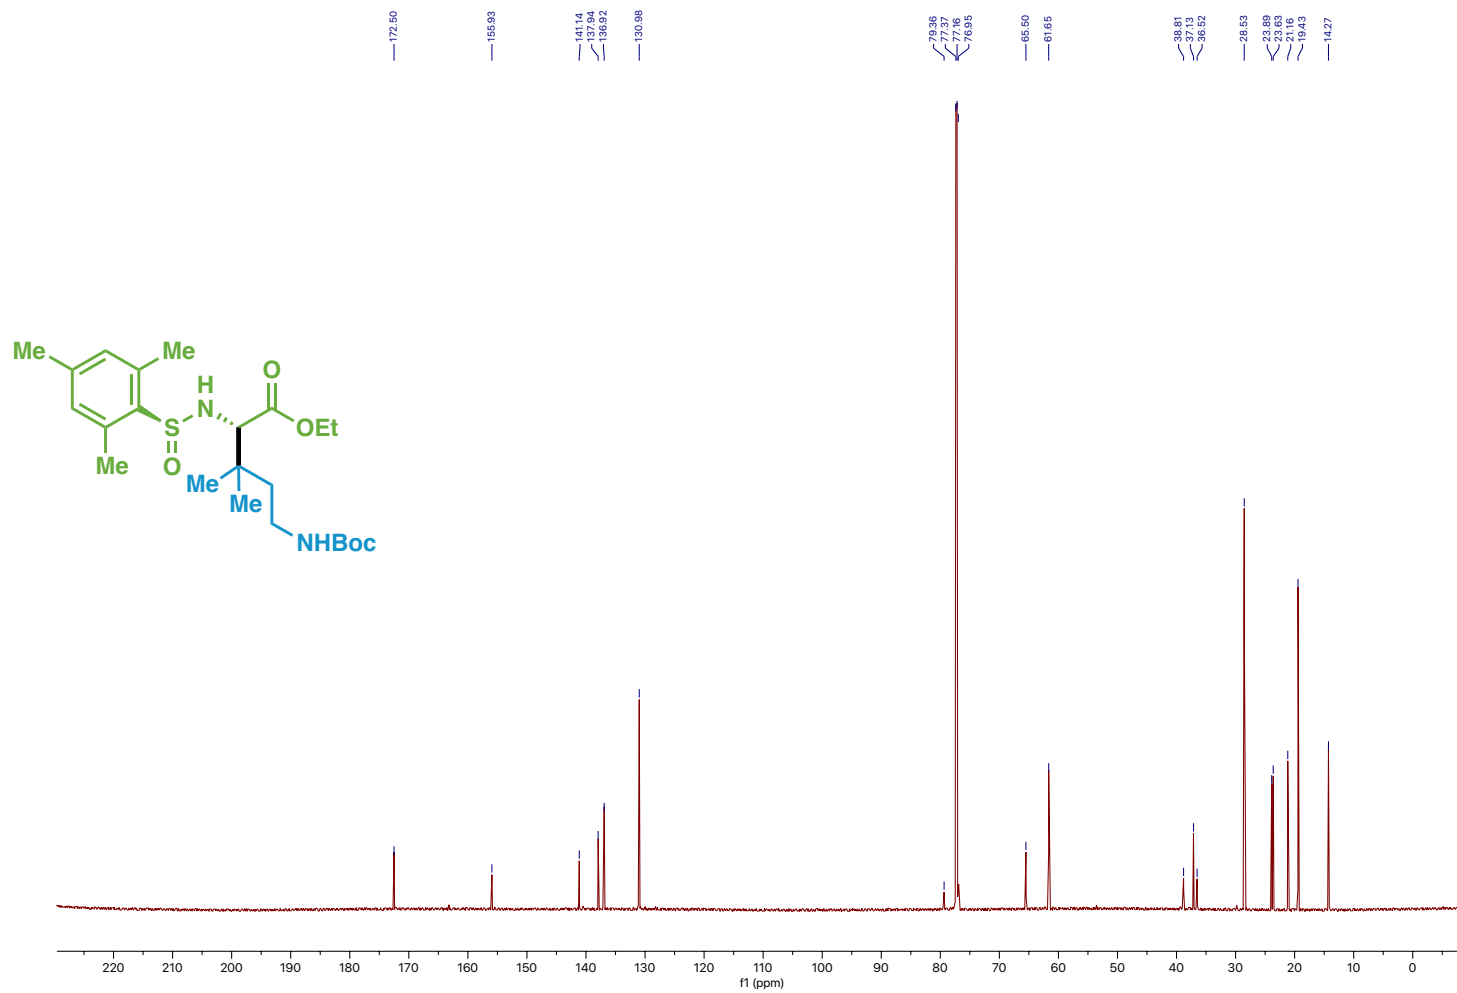

# Compound 18 <sup>1</sup>H NMR

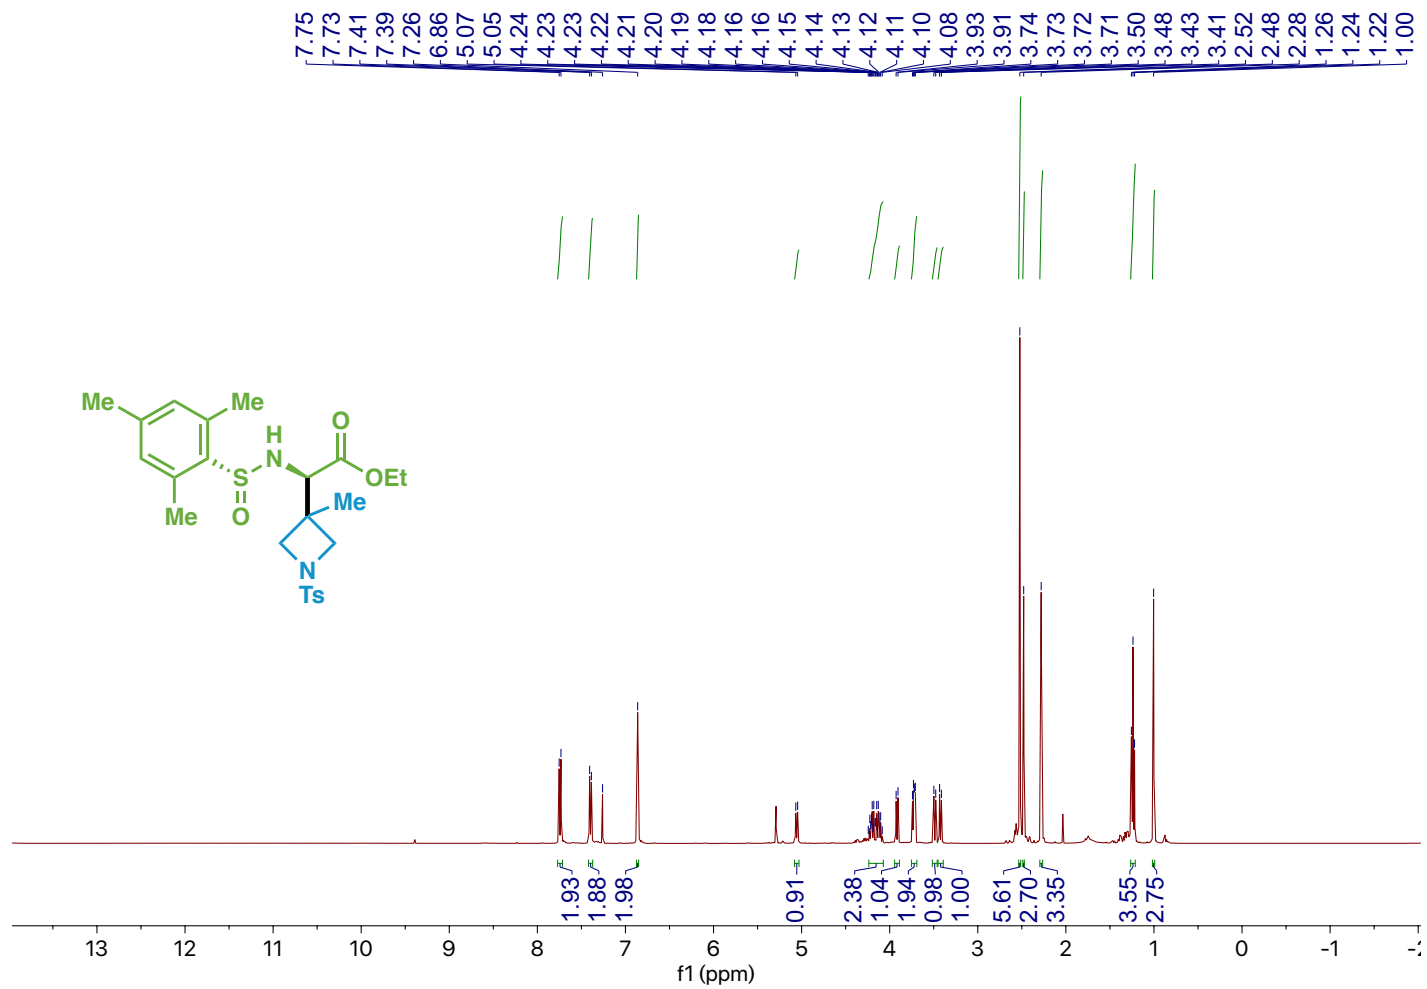

# Compound 18 <sup>13</sup>C NMR

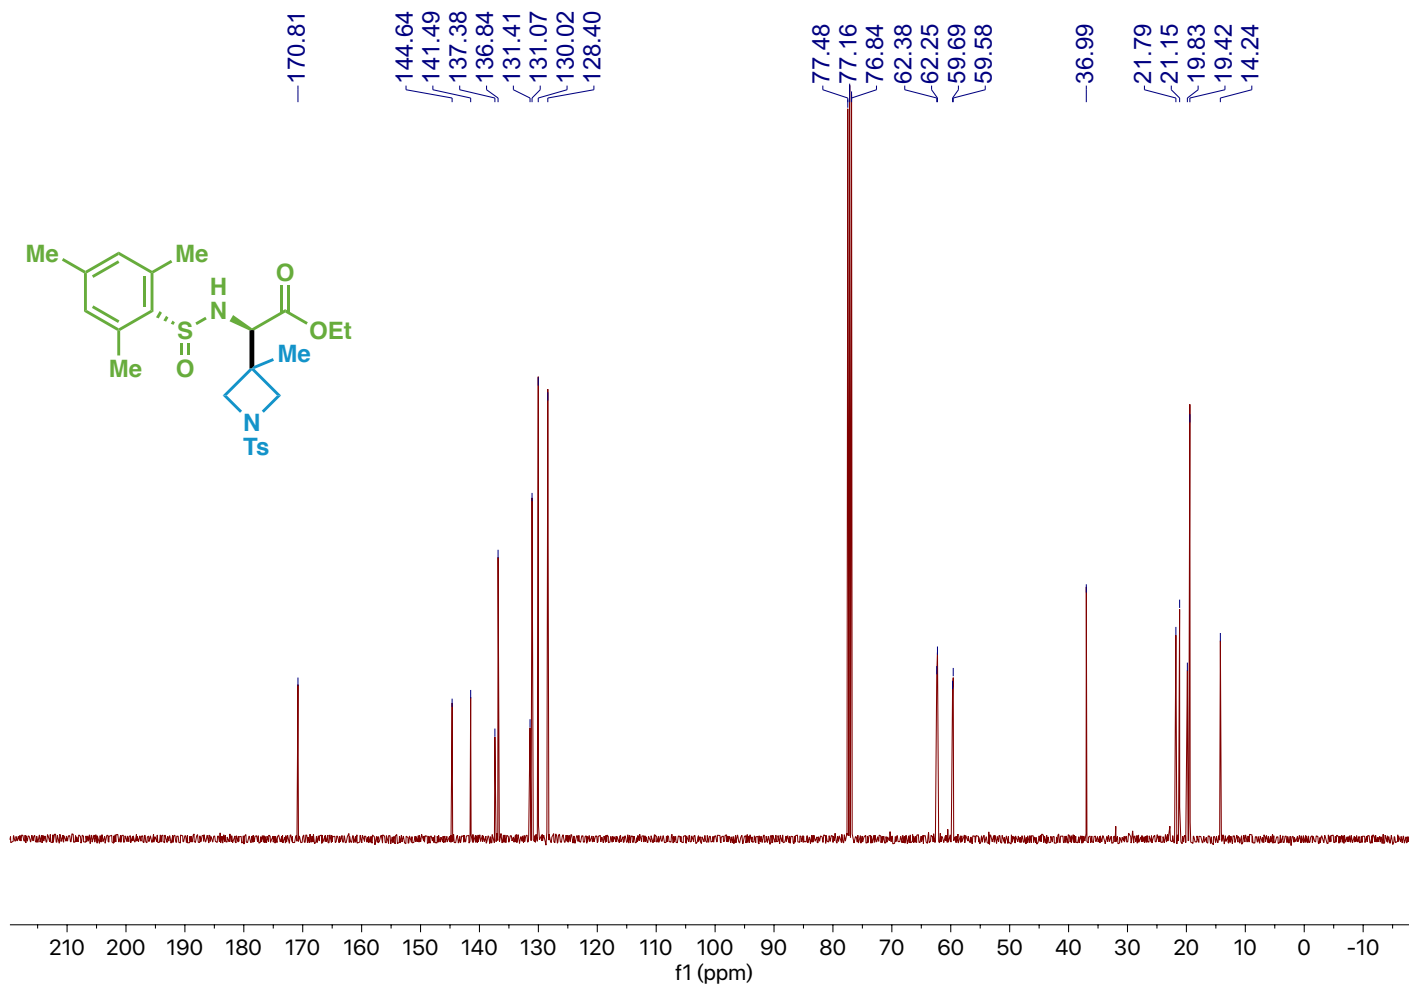

# Compound 19 <sup>1</sup>H NMR

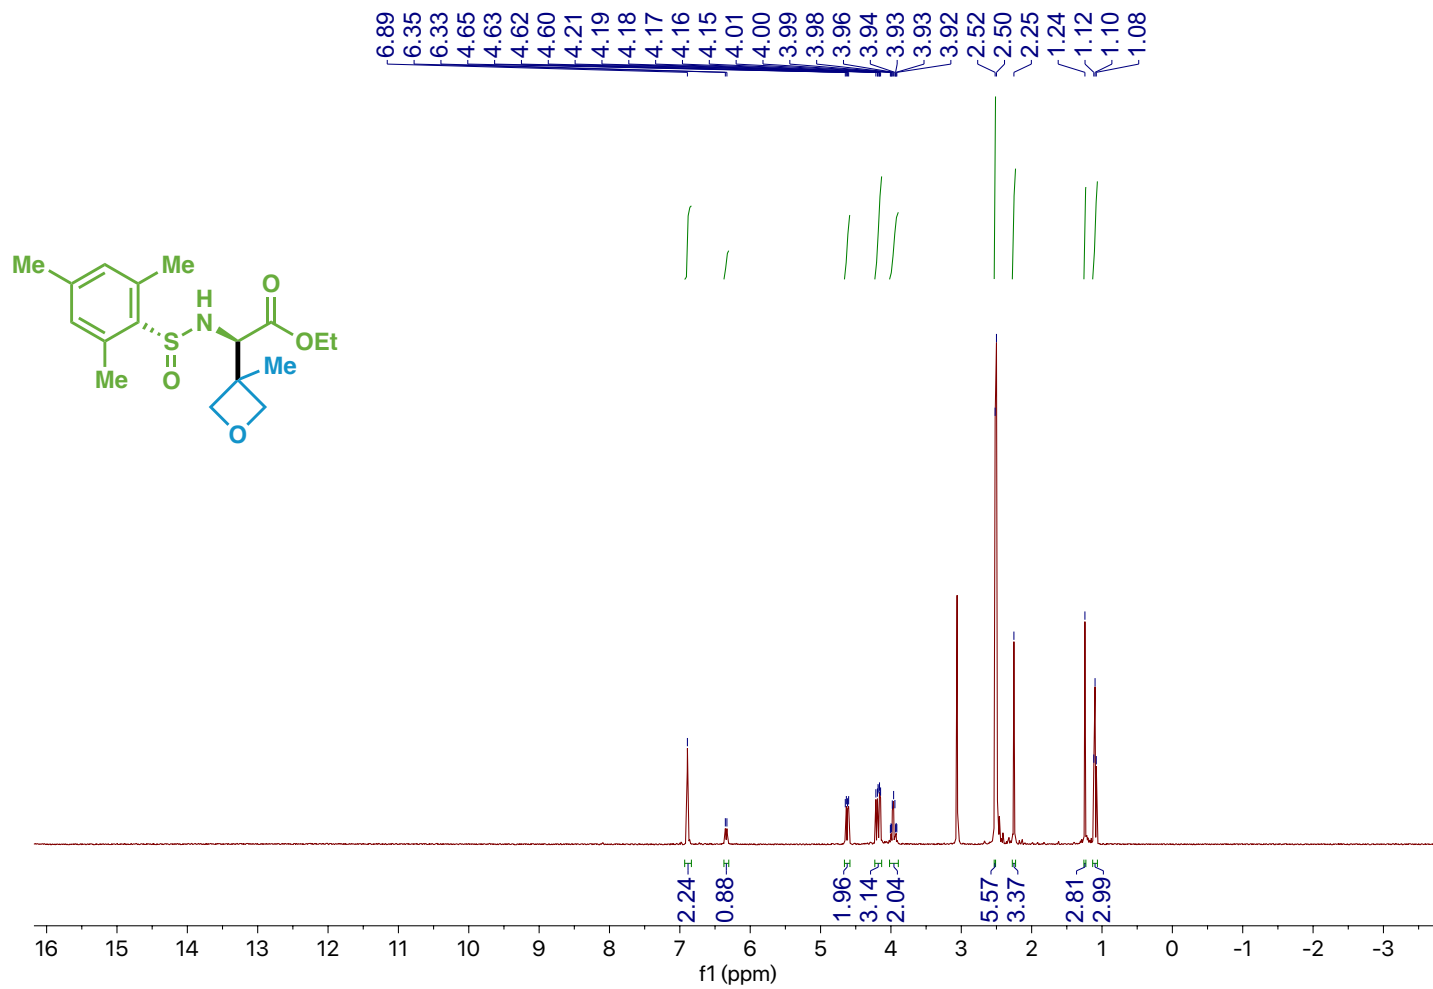

# Compound 19 <sup>13</sup>C NMR

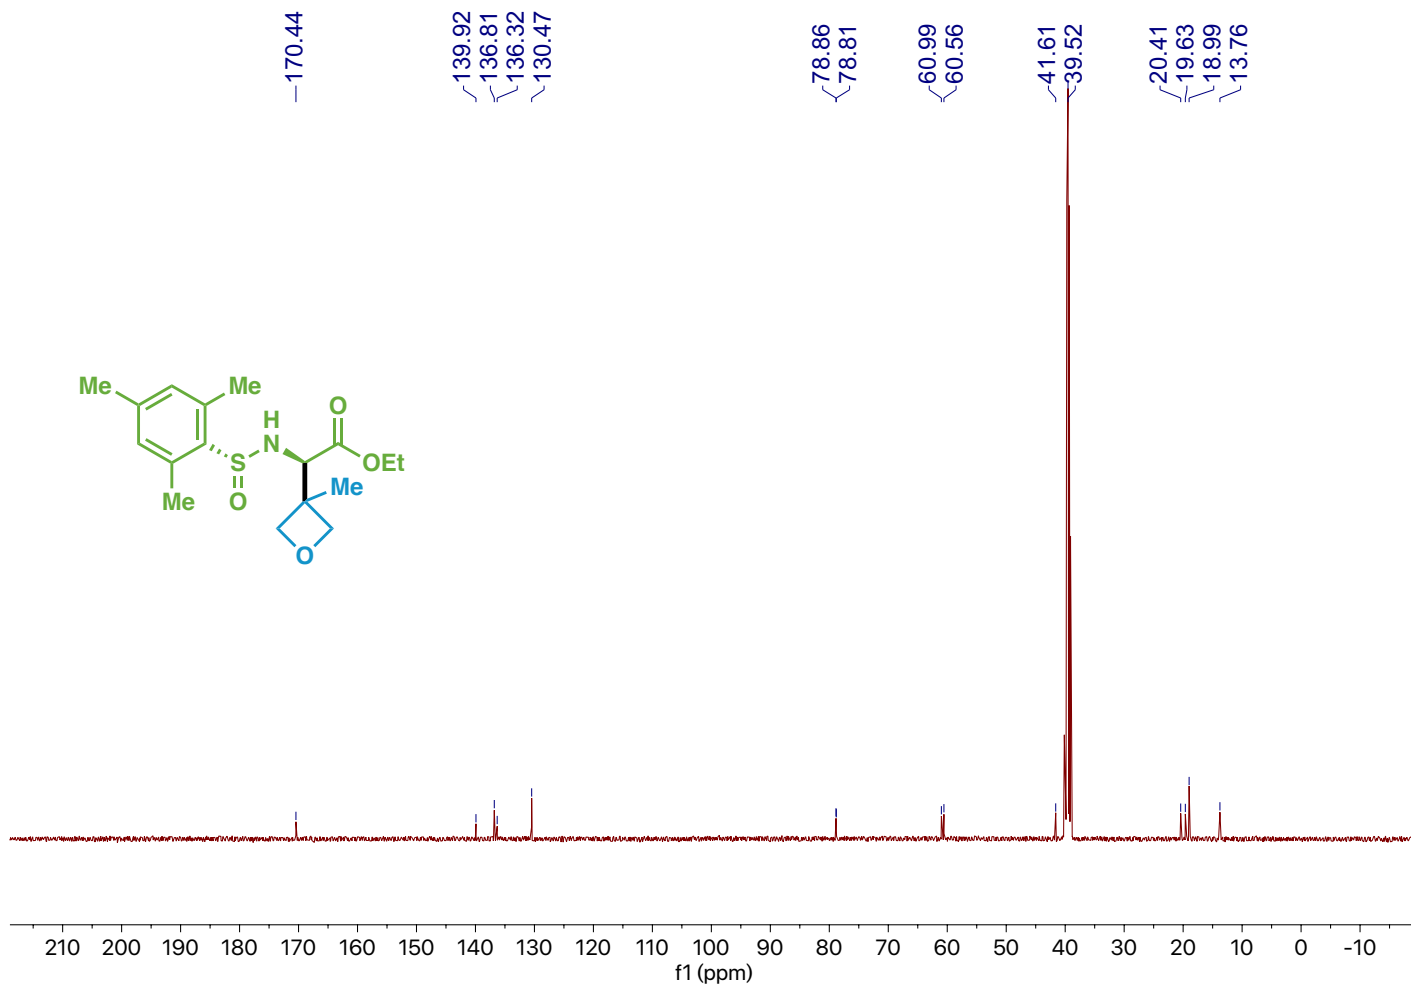

# Compound 20 <sup>1</sup>H NMR

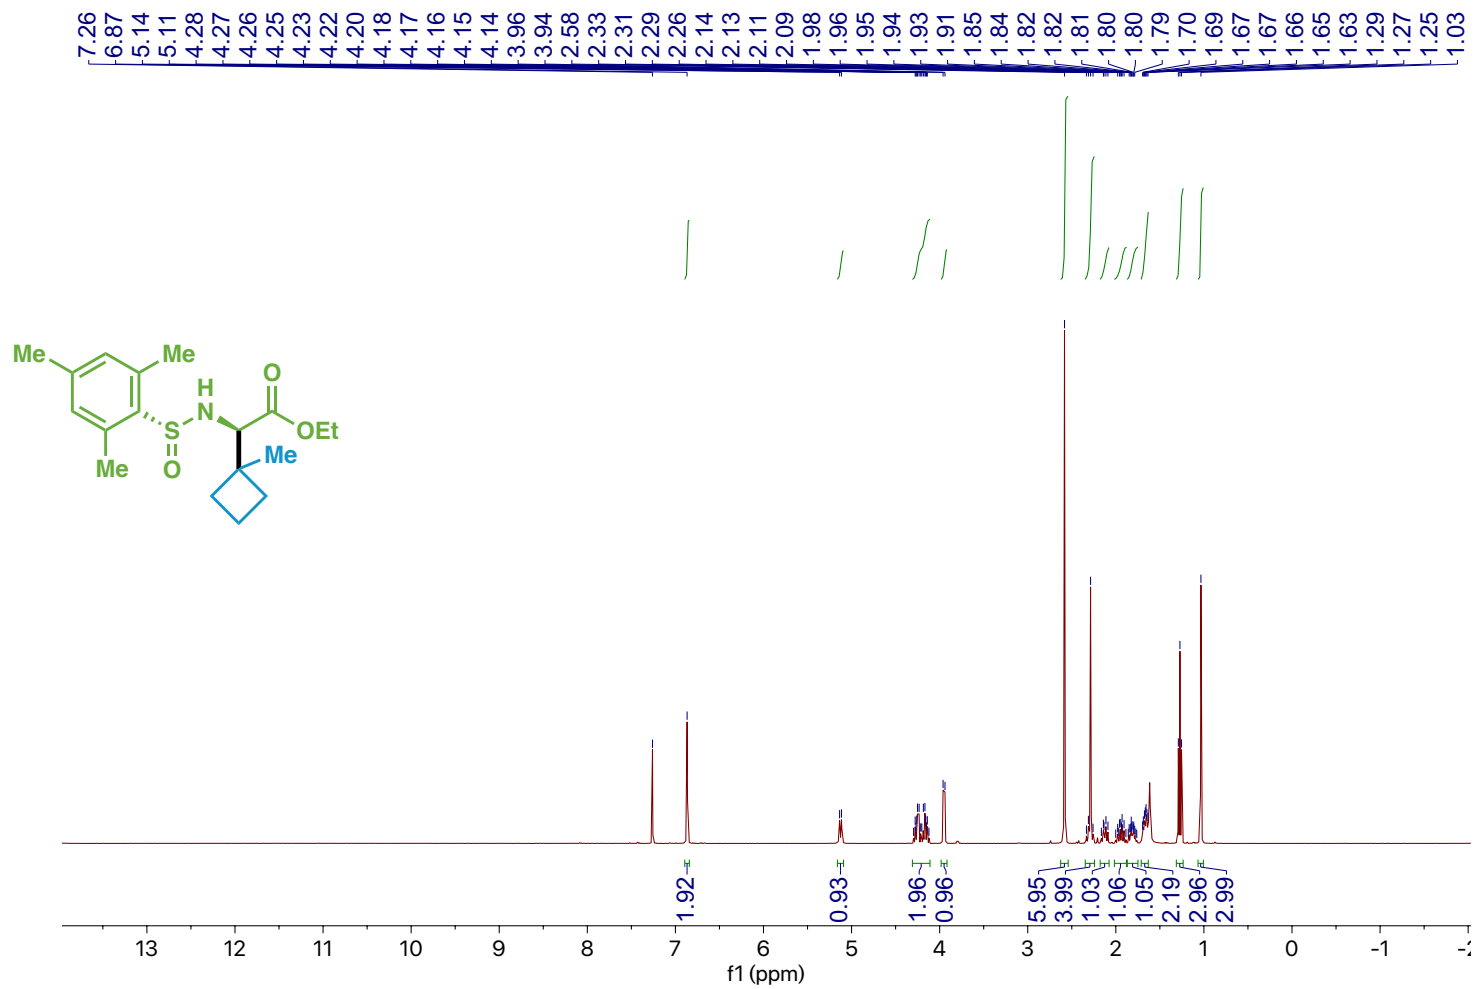



# Compound 20 <sup>13</sup>C NMR

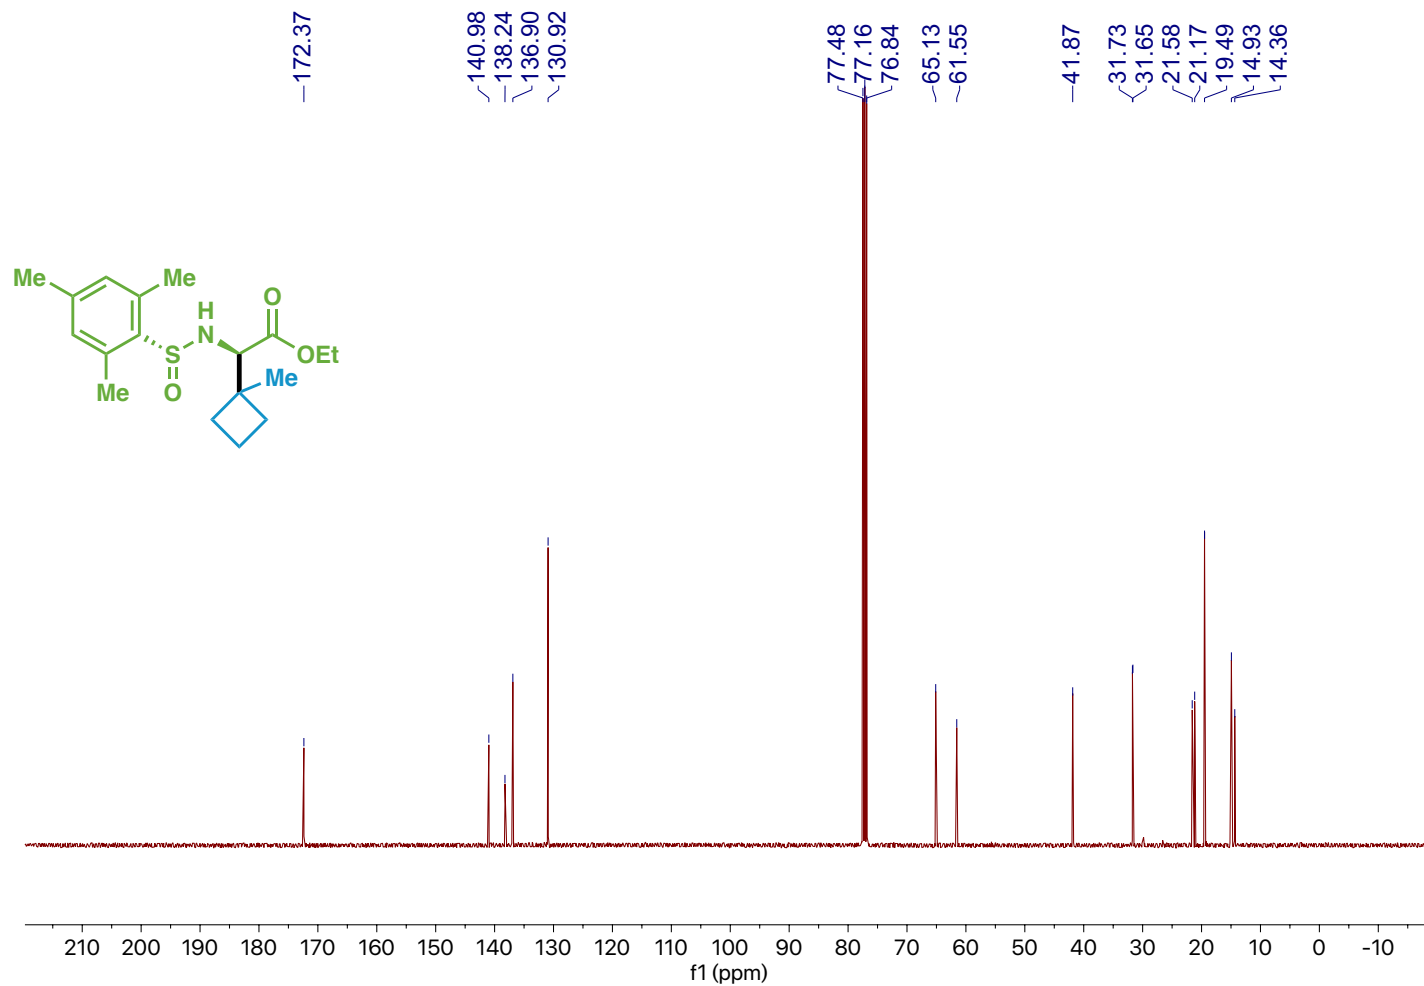

# Compound 21 <sup>1</sup>H NMR

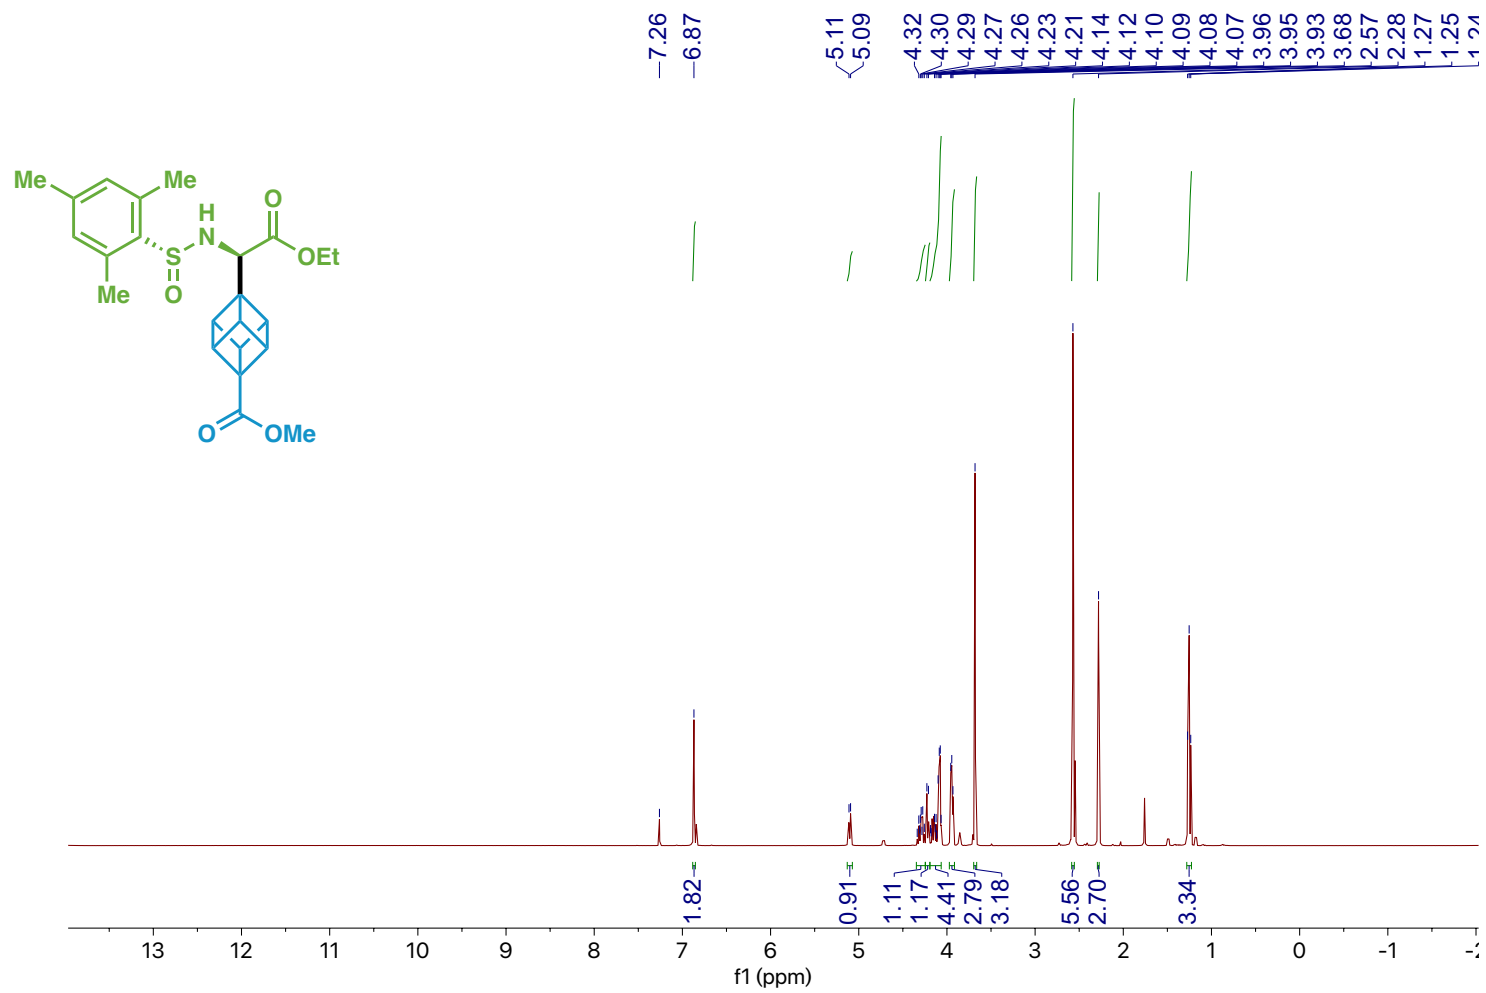

# Compound 21 <sup>13</sup>C NMR

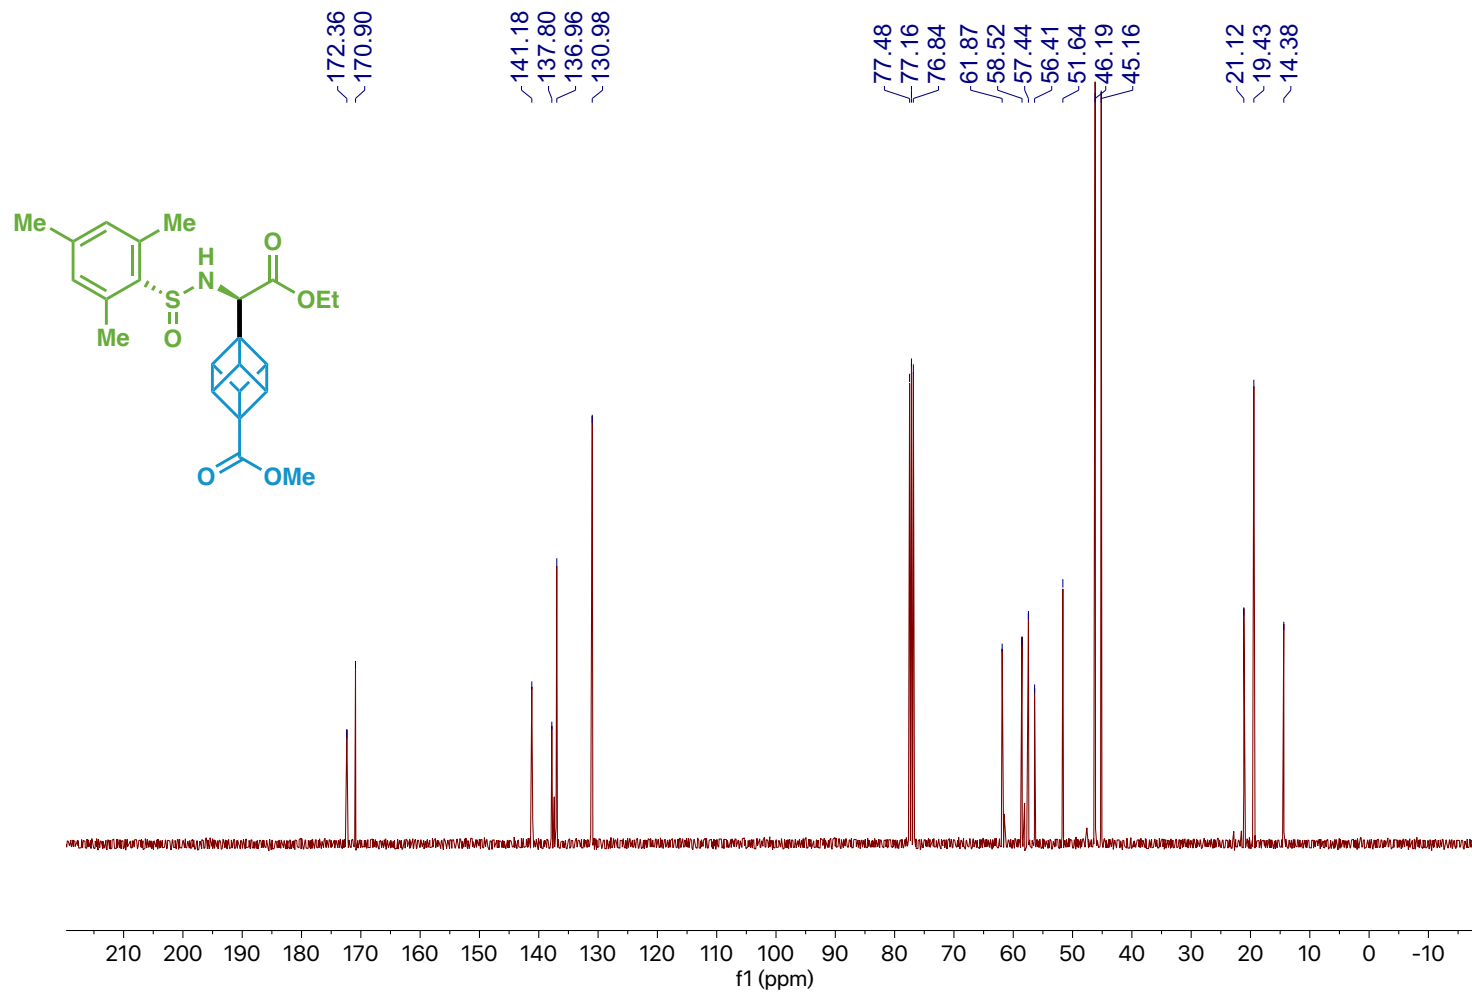

# Compound 22 <sup>1</sup>H NMR

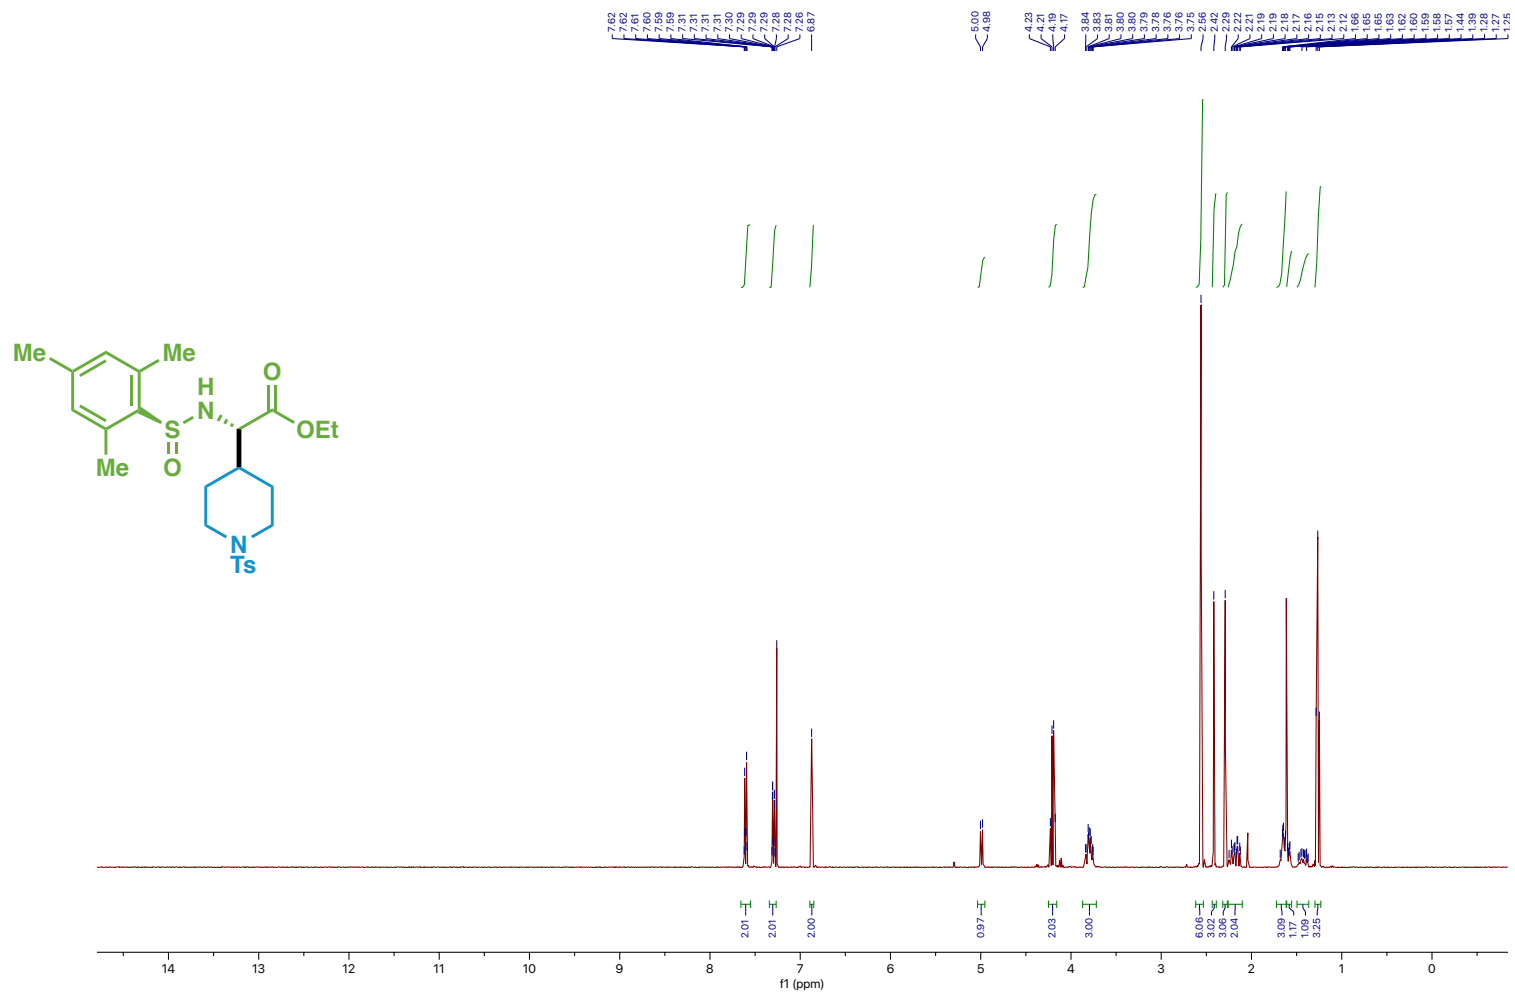

# Compound 22 <sup>13</sup>C NMR

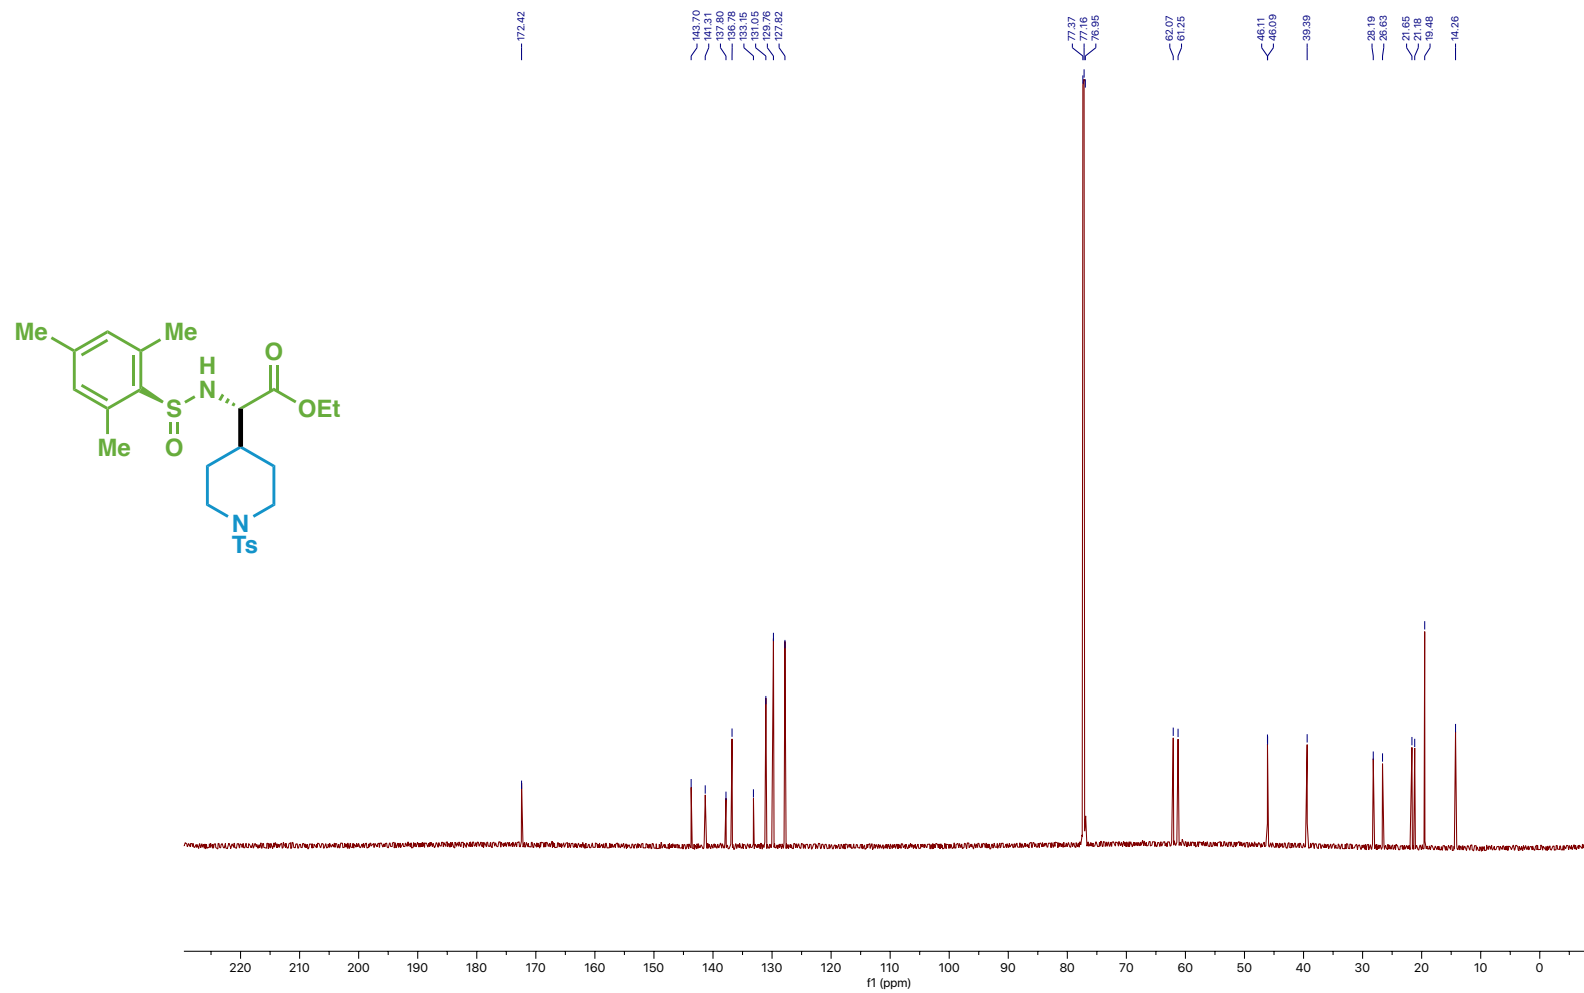

# Compound 23 <sup>1</sup>H NMR

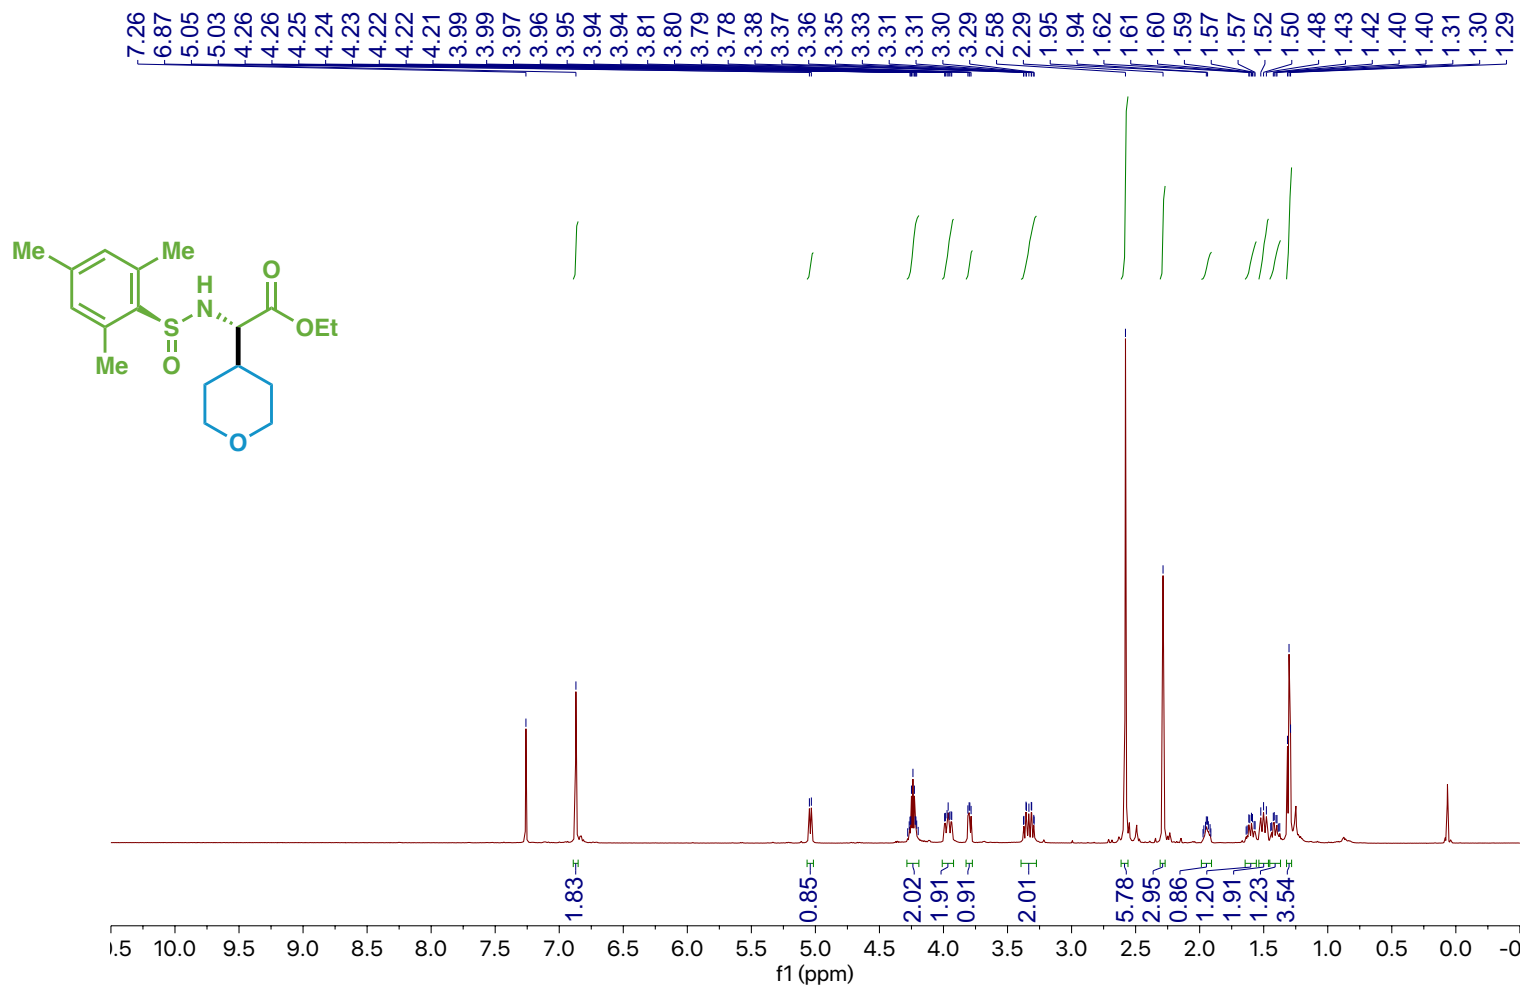

# Compound 23 <sup>13</sup>C NMR

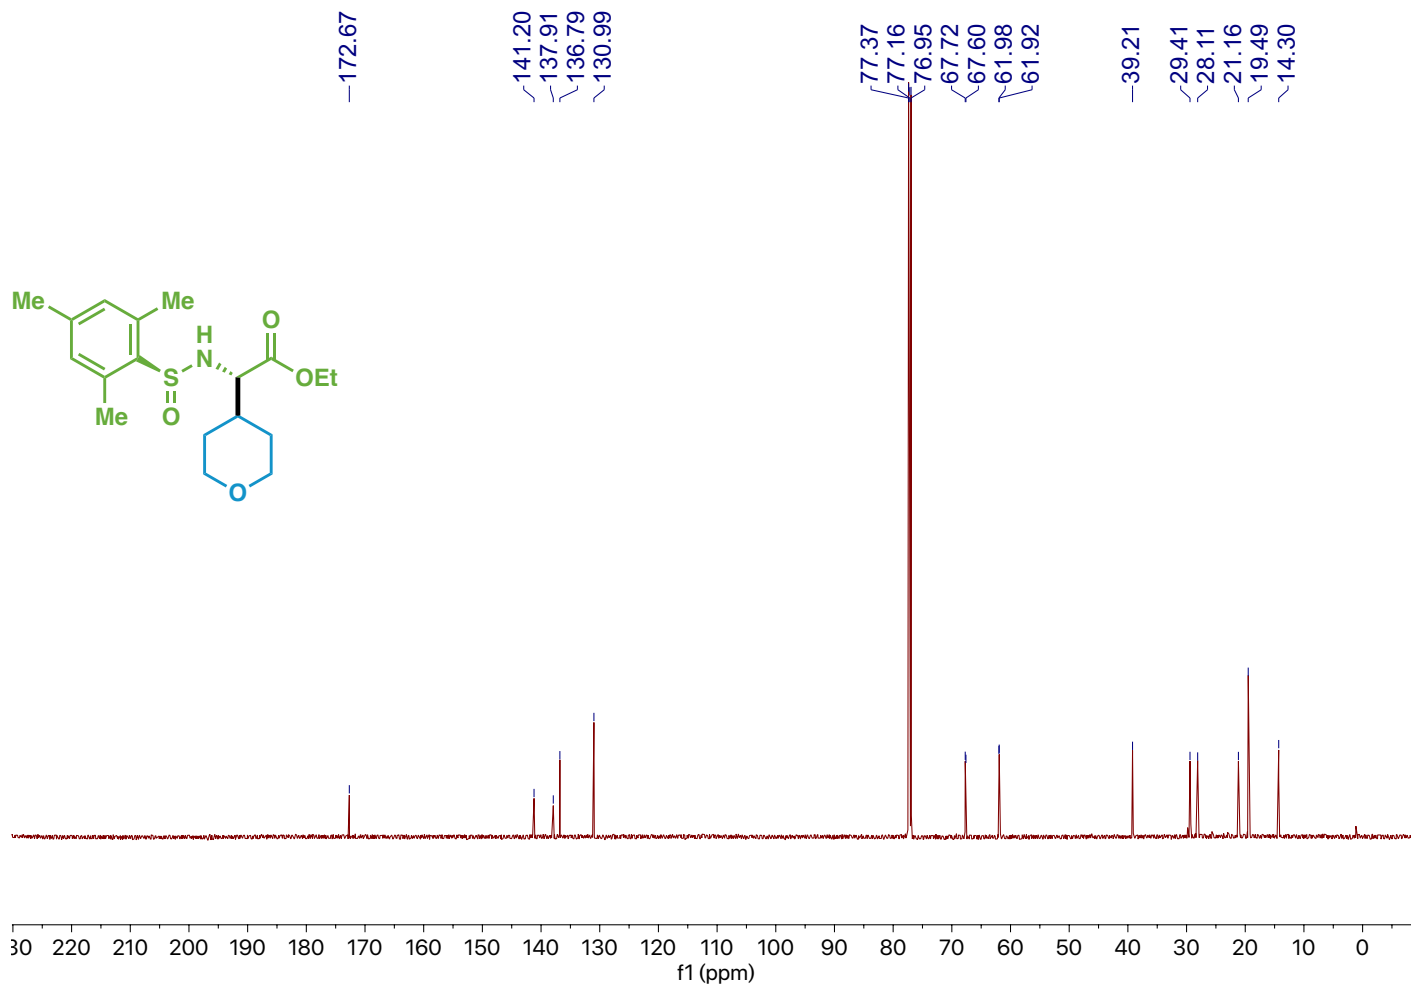

# Compound 24 <sup>1</sup>H NMR

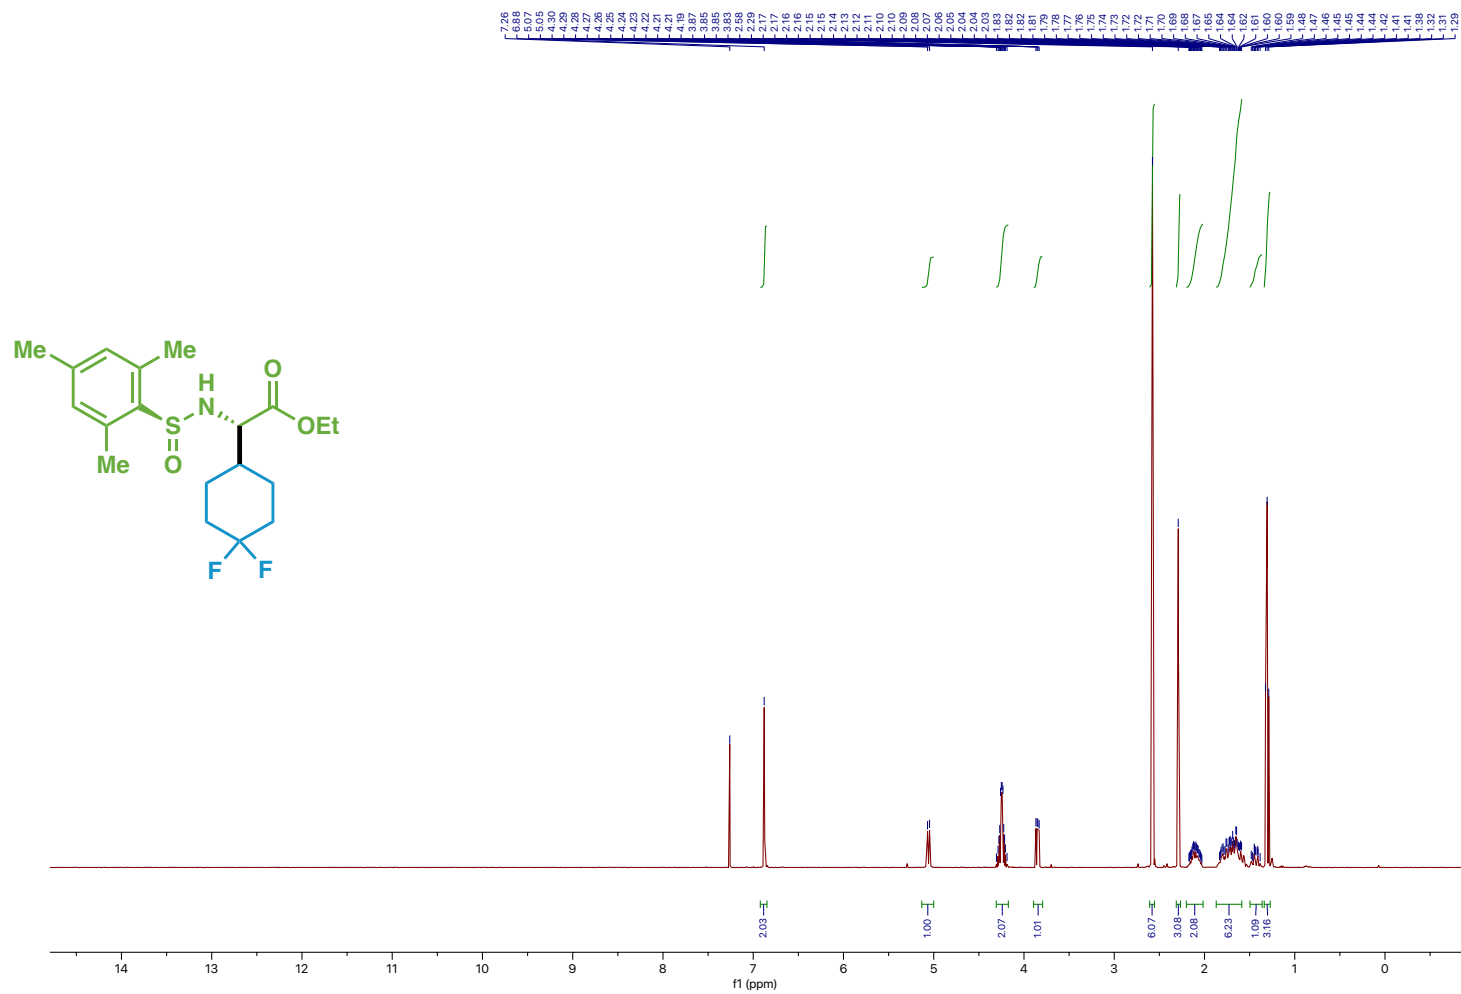



# Compound 24 <sup>13</sup>C NMR

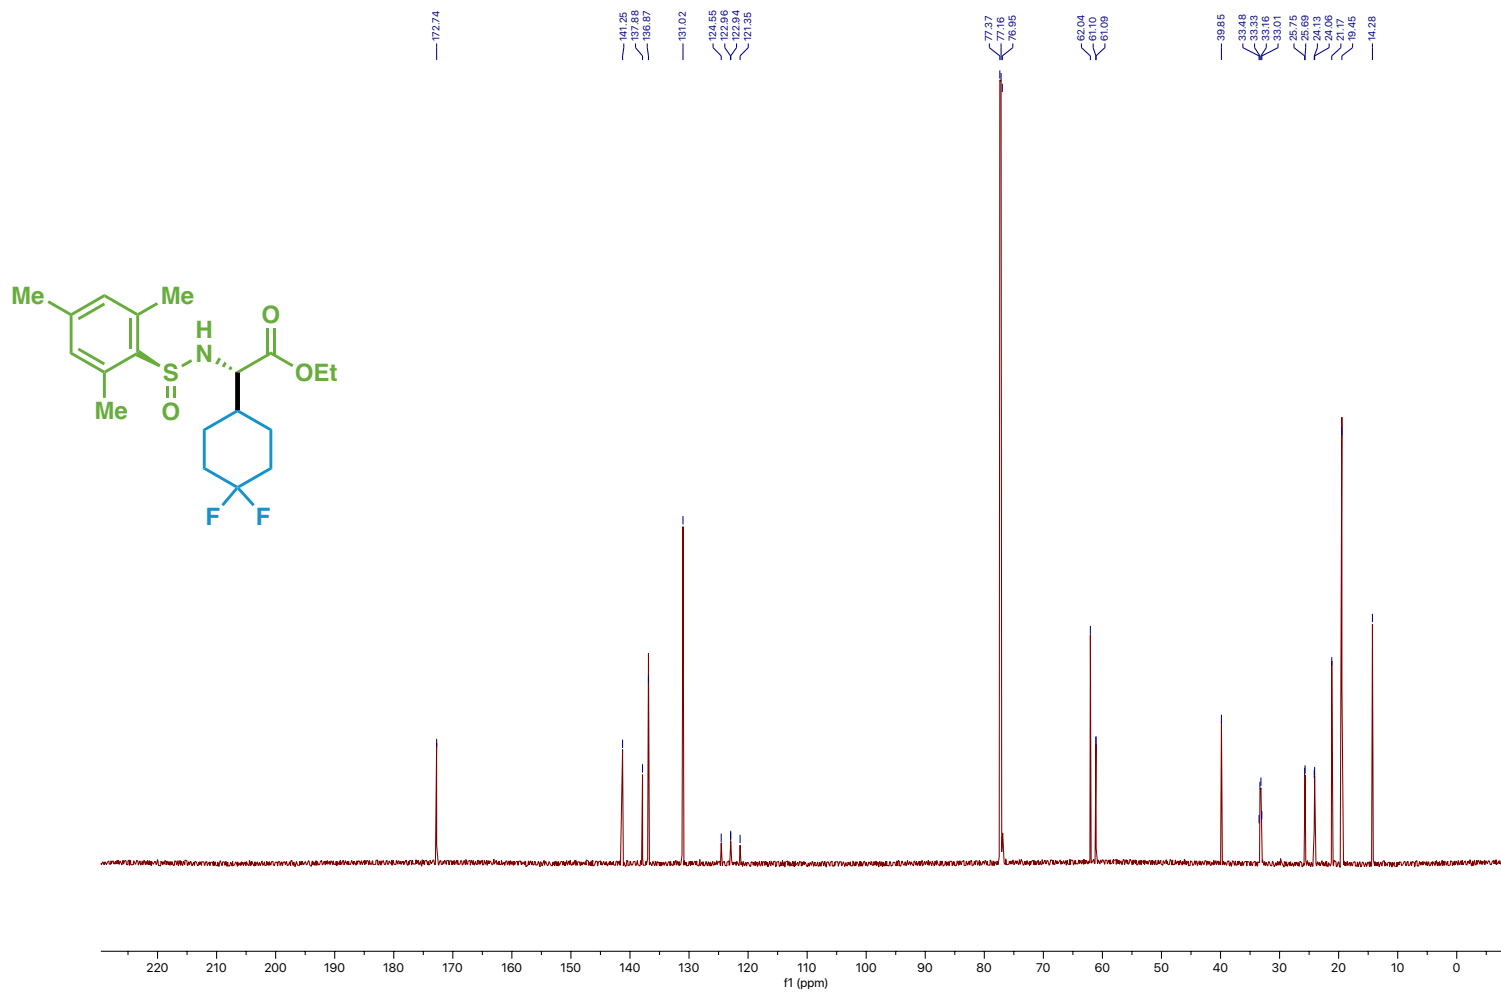

# Compound 24 <sup>19</sup>F NMR

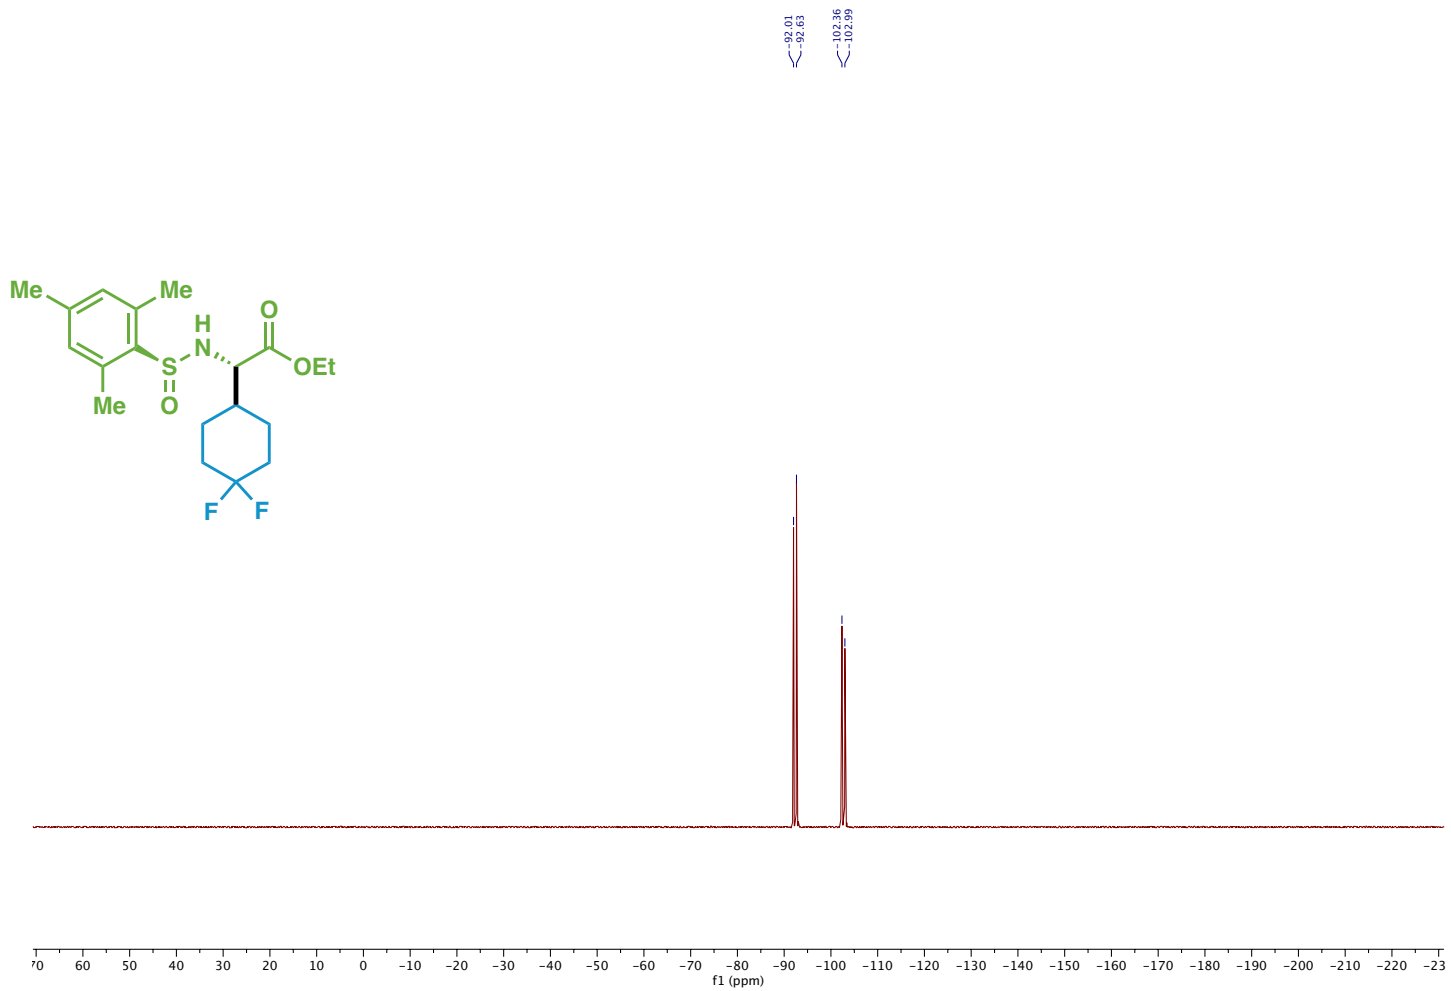

# Compound 25 <sup>1</sup>H NMR

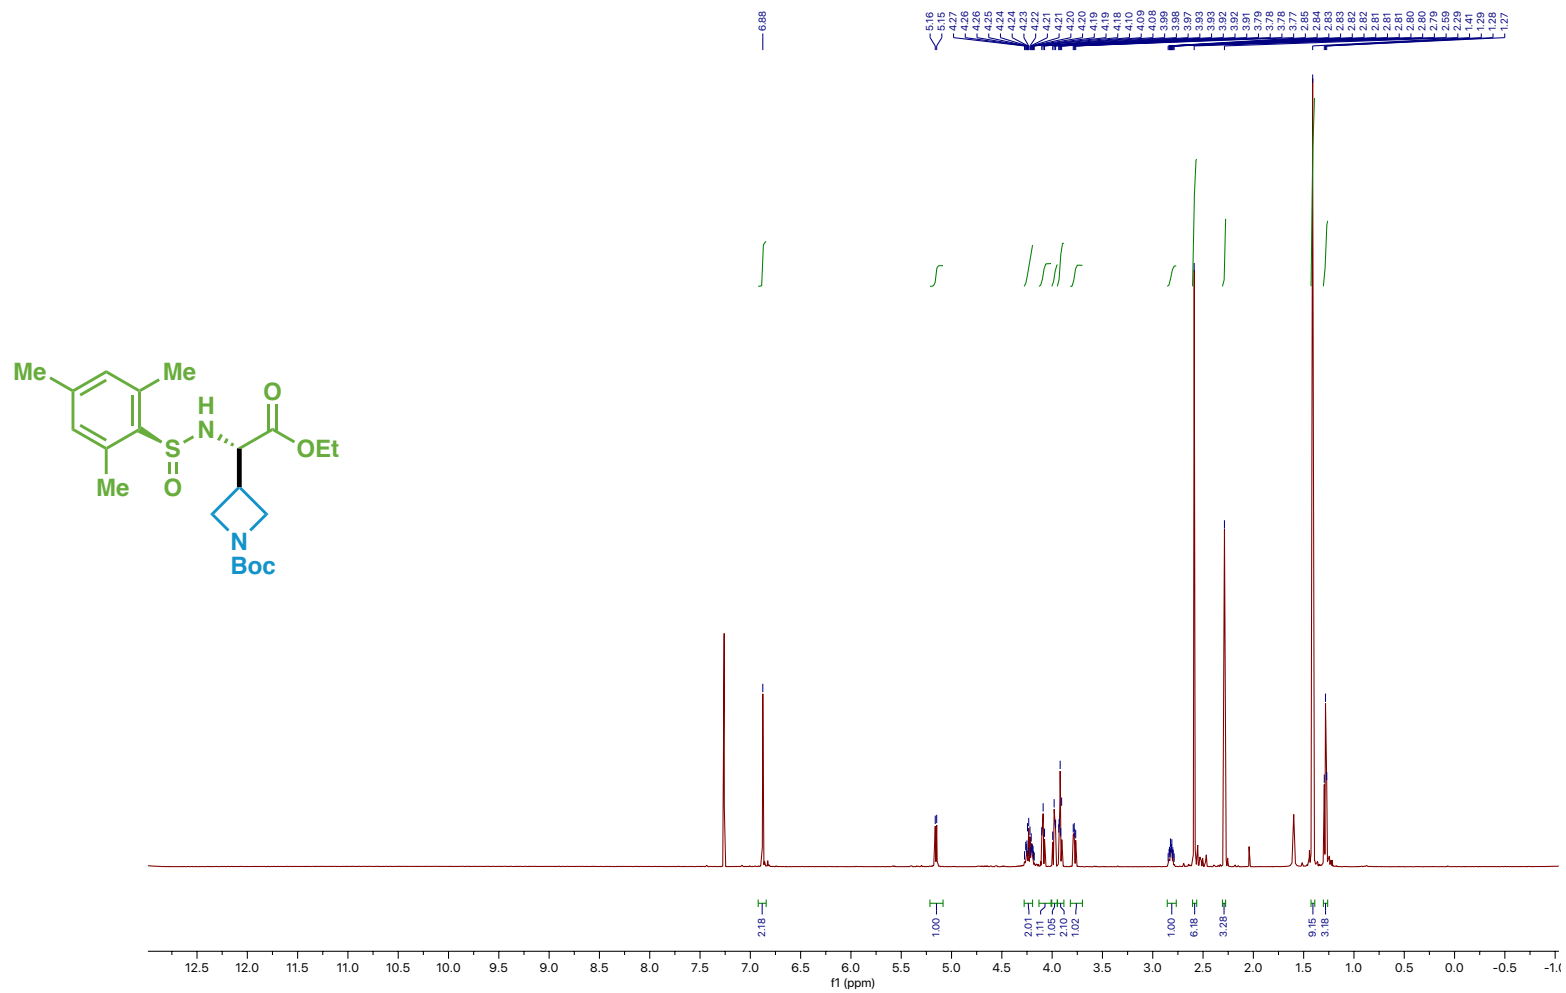

# Compound 25 <sup>13</sup>C NMR

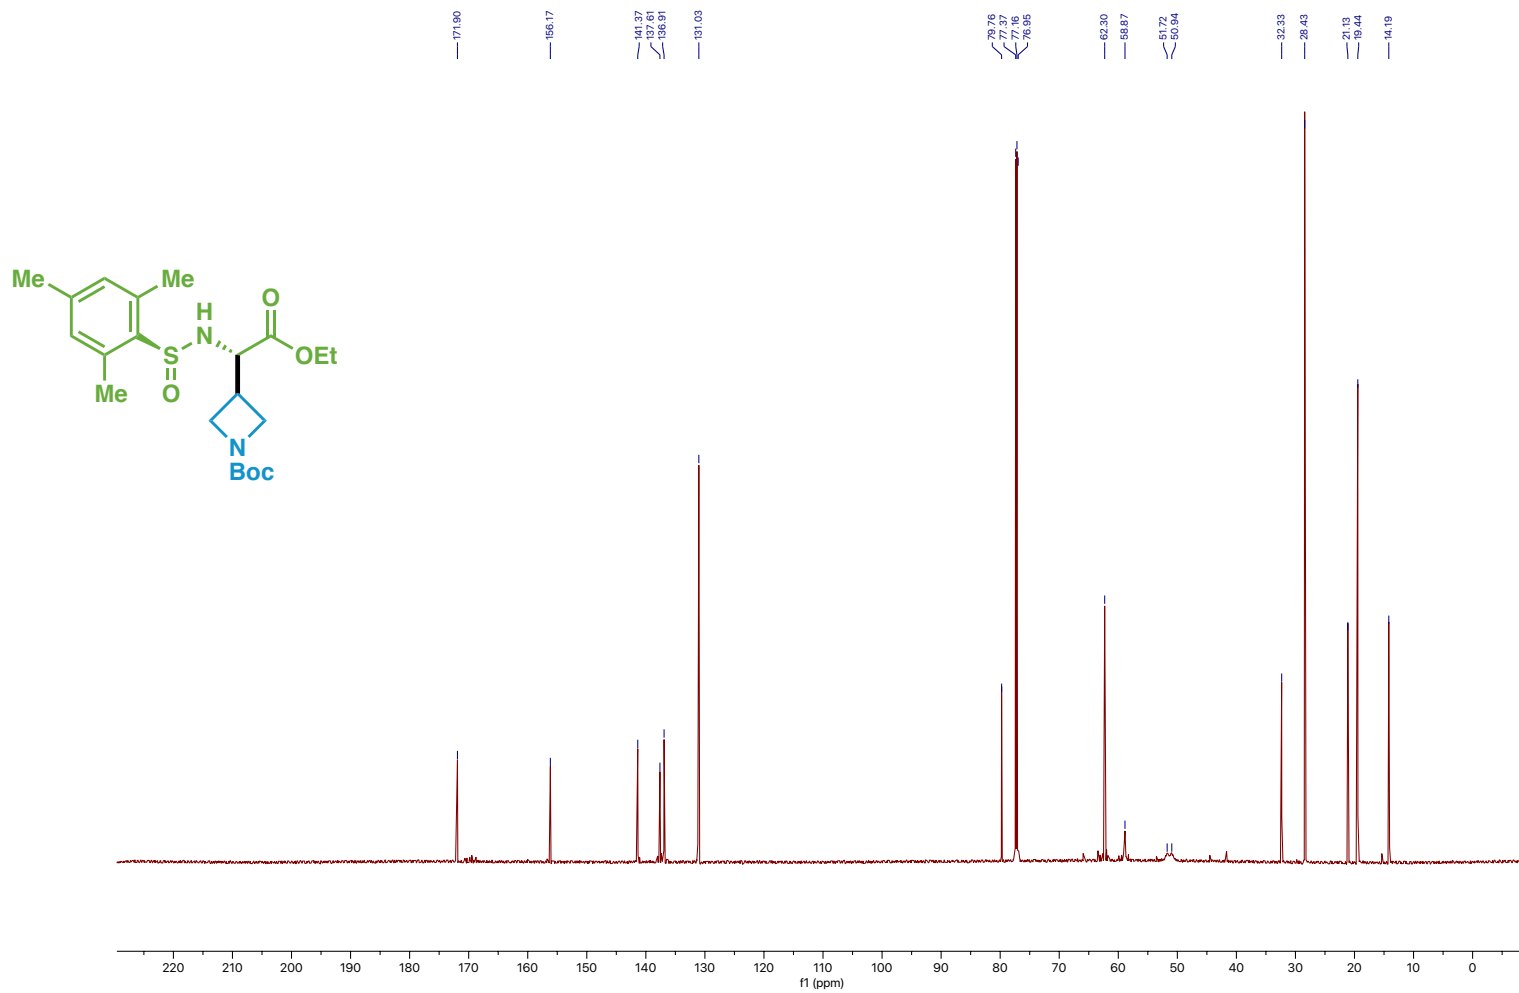

# Compound 26 <sup>1</sup>H NMR

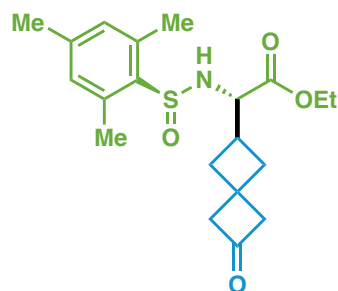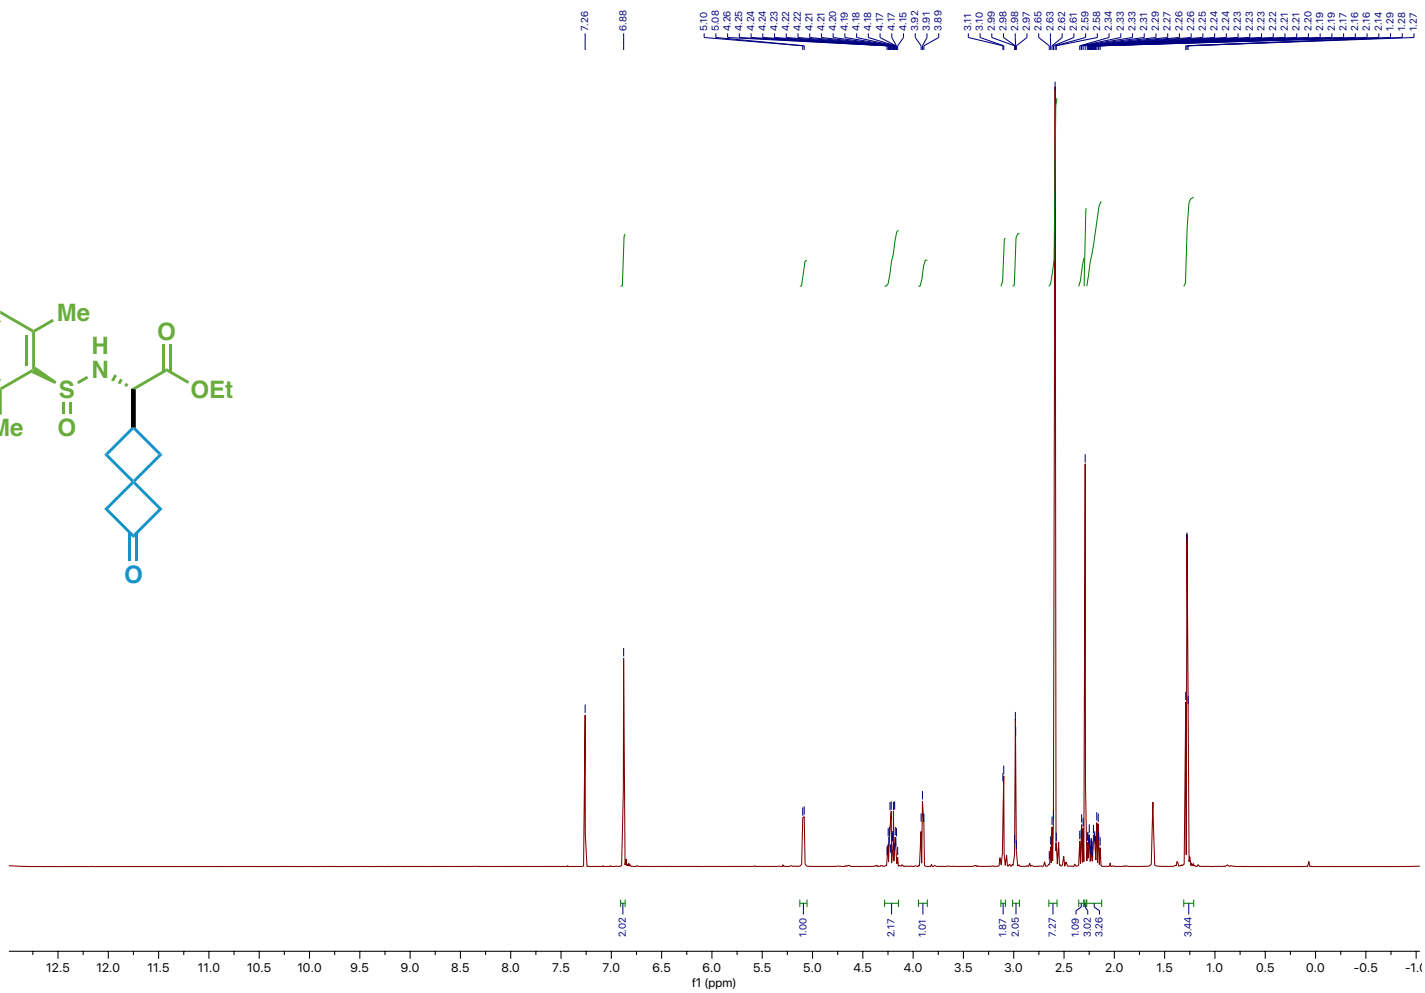

# Compound 26 <sup>13</sup>C NMR

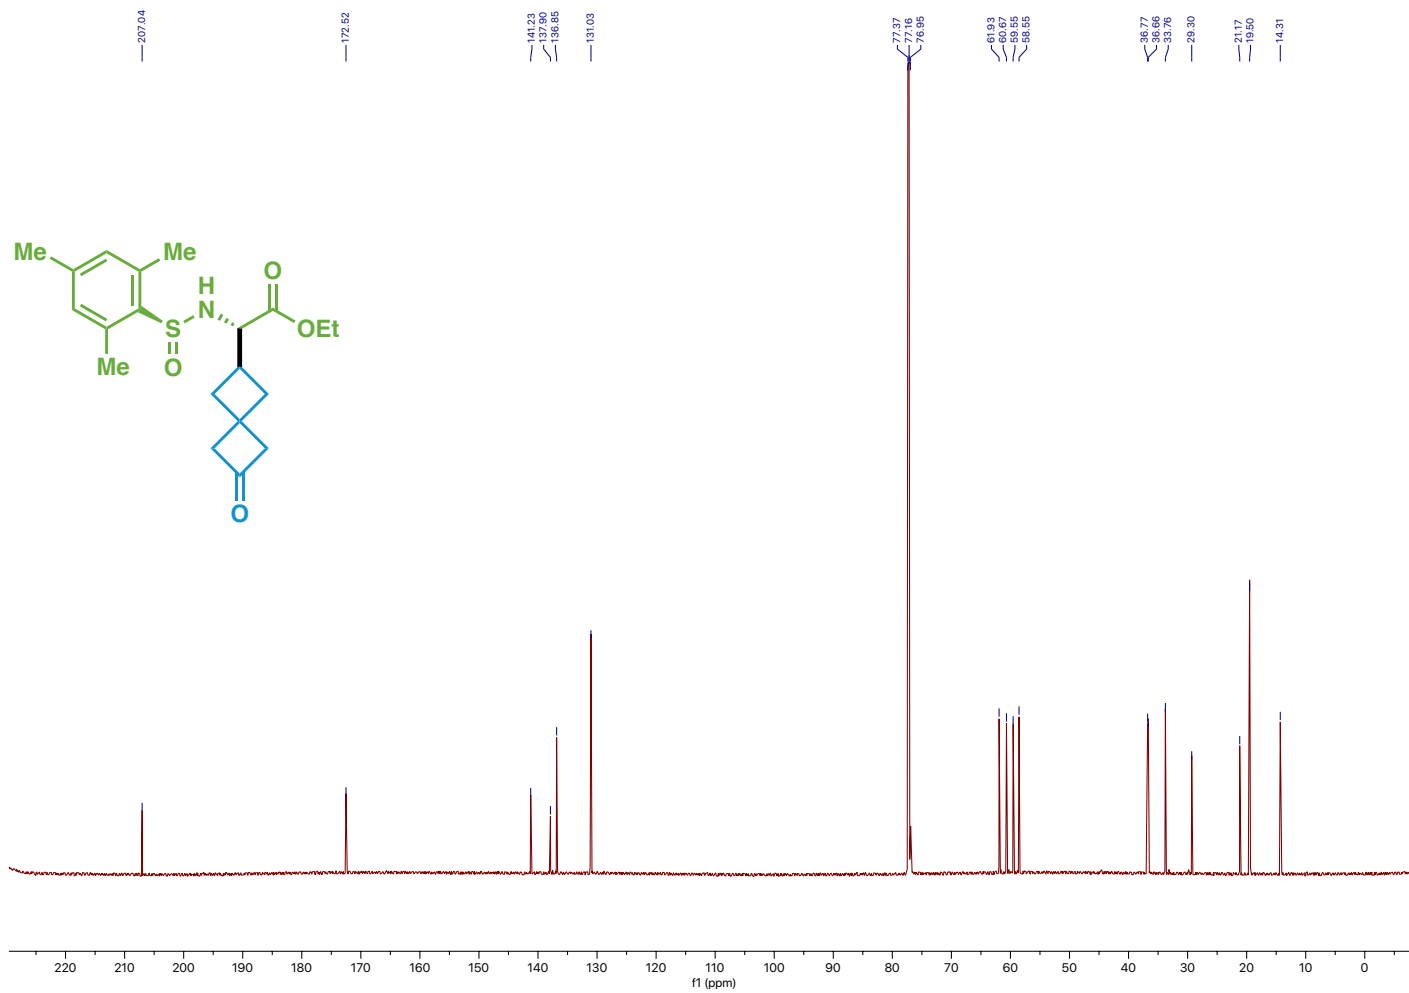



# Compound 27 <sup>13</sup>C NMR

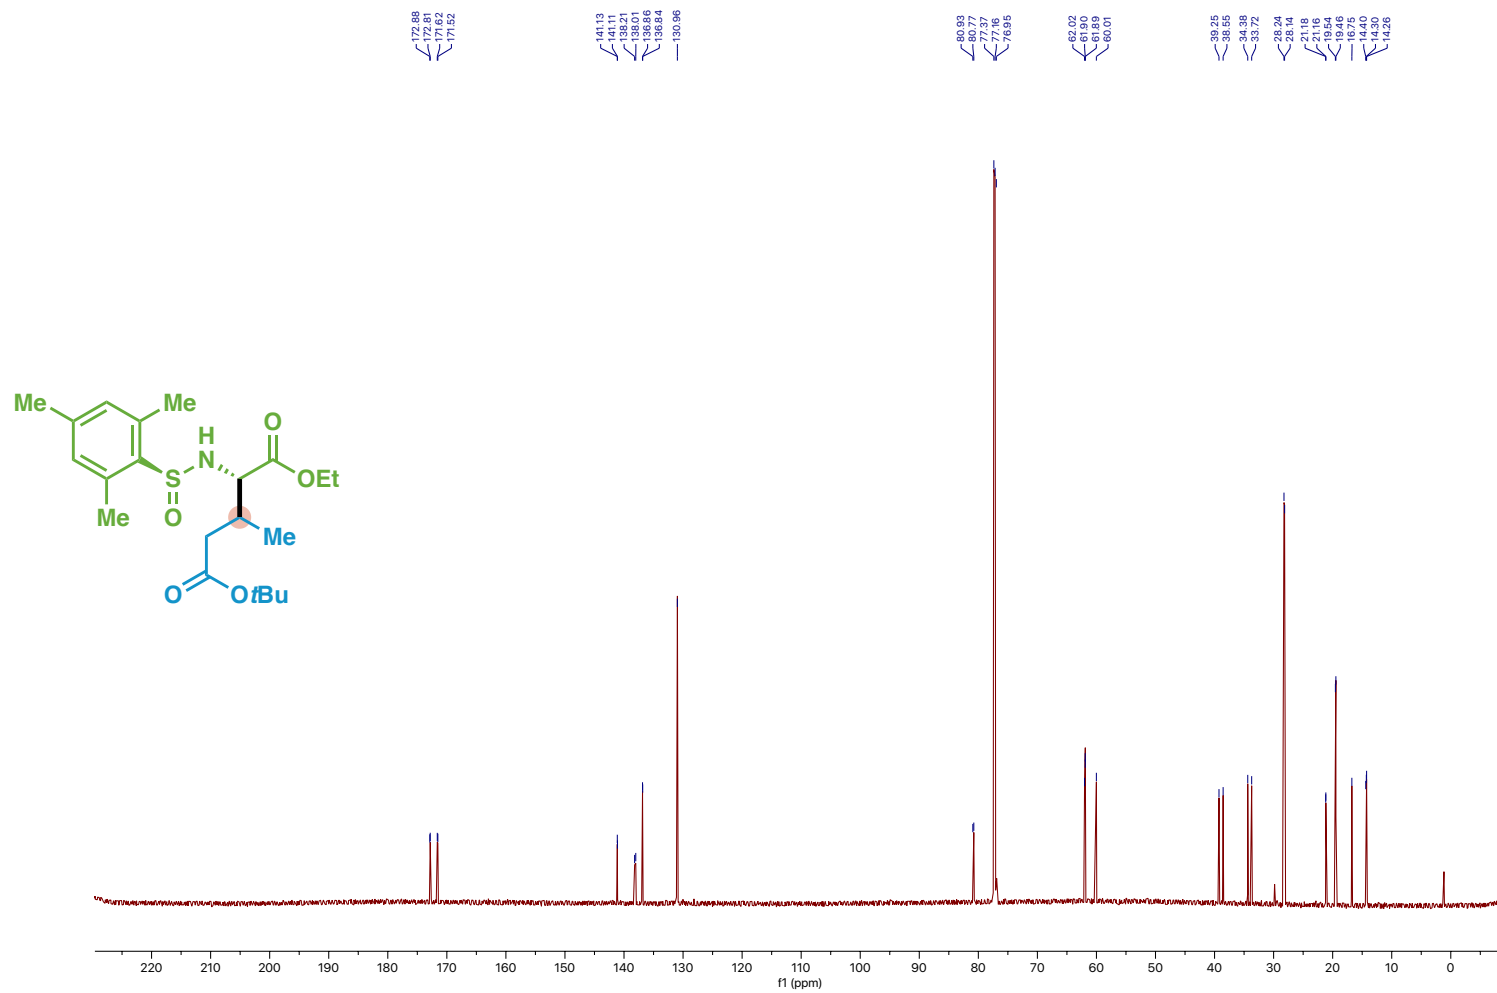



# Compound 28 <sup>1</sup>H NMR

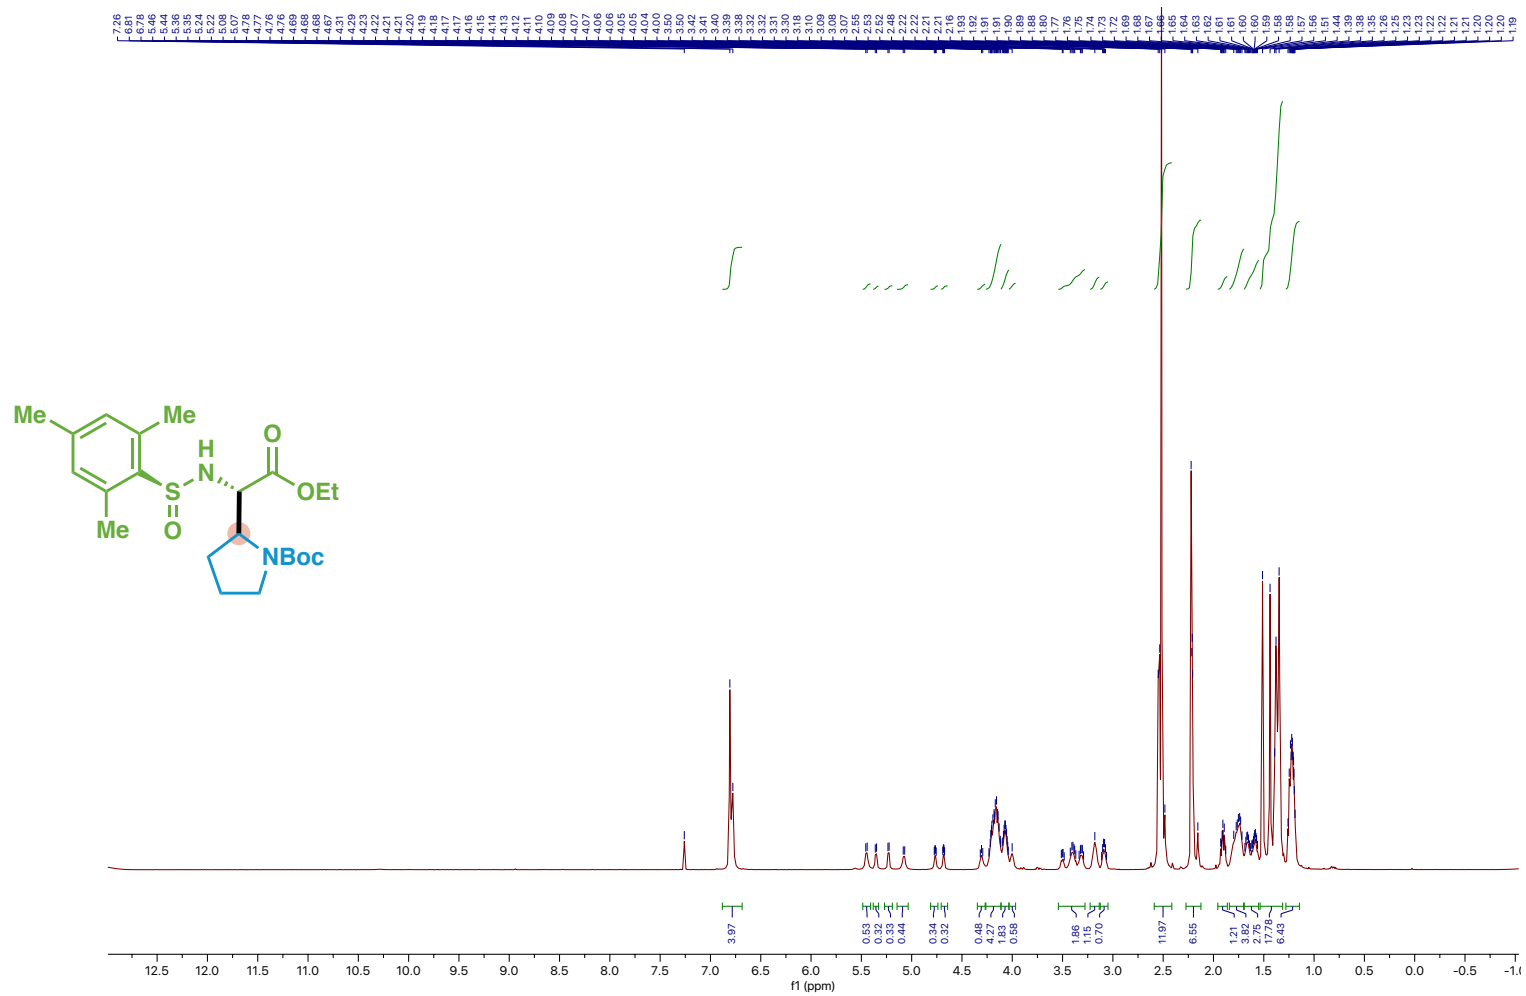

# Compound 28 <sup>13</sup>C NMR

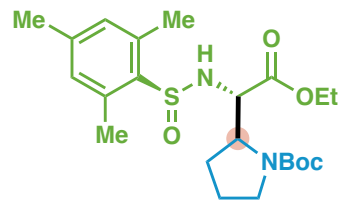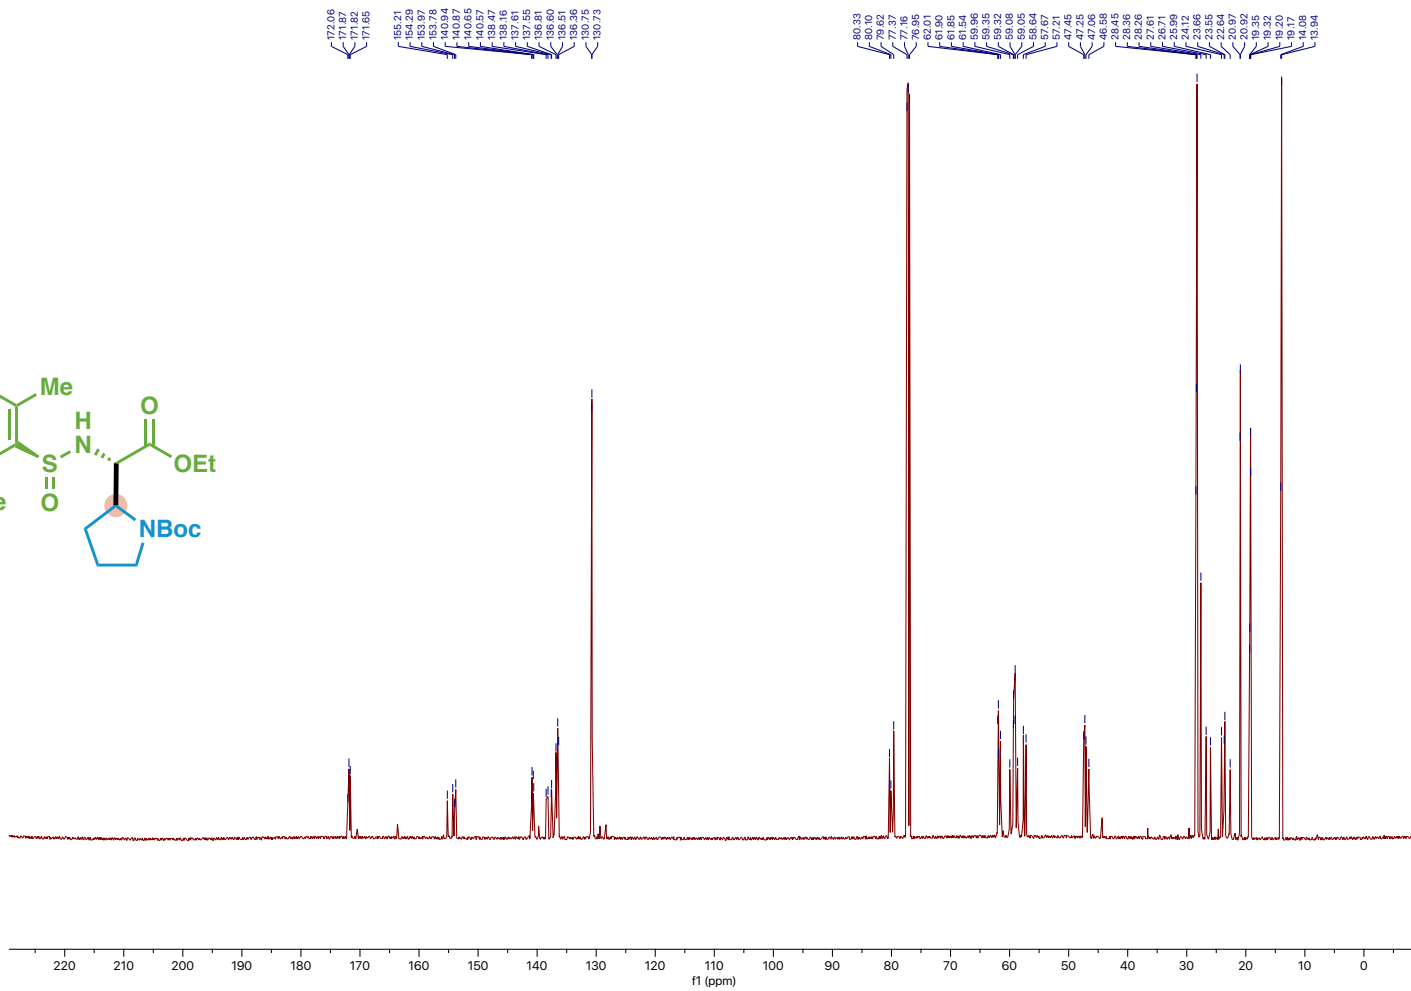

# Compound 29 <sup>1</sup>H NMR

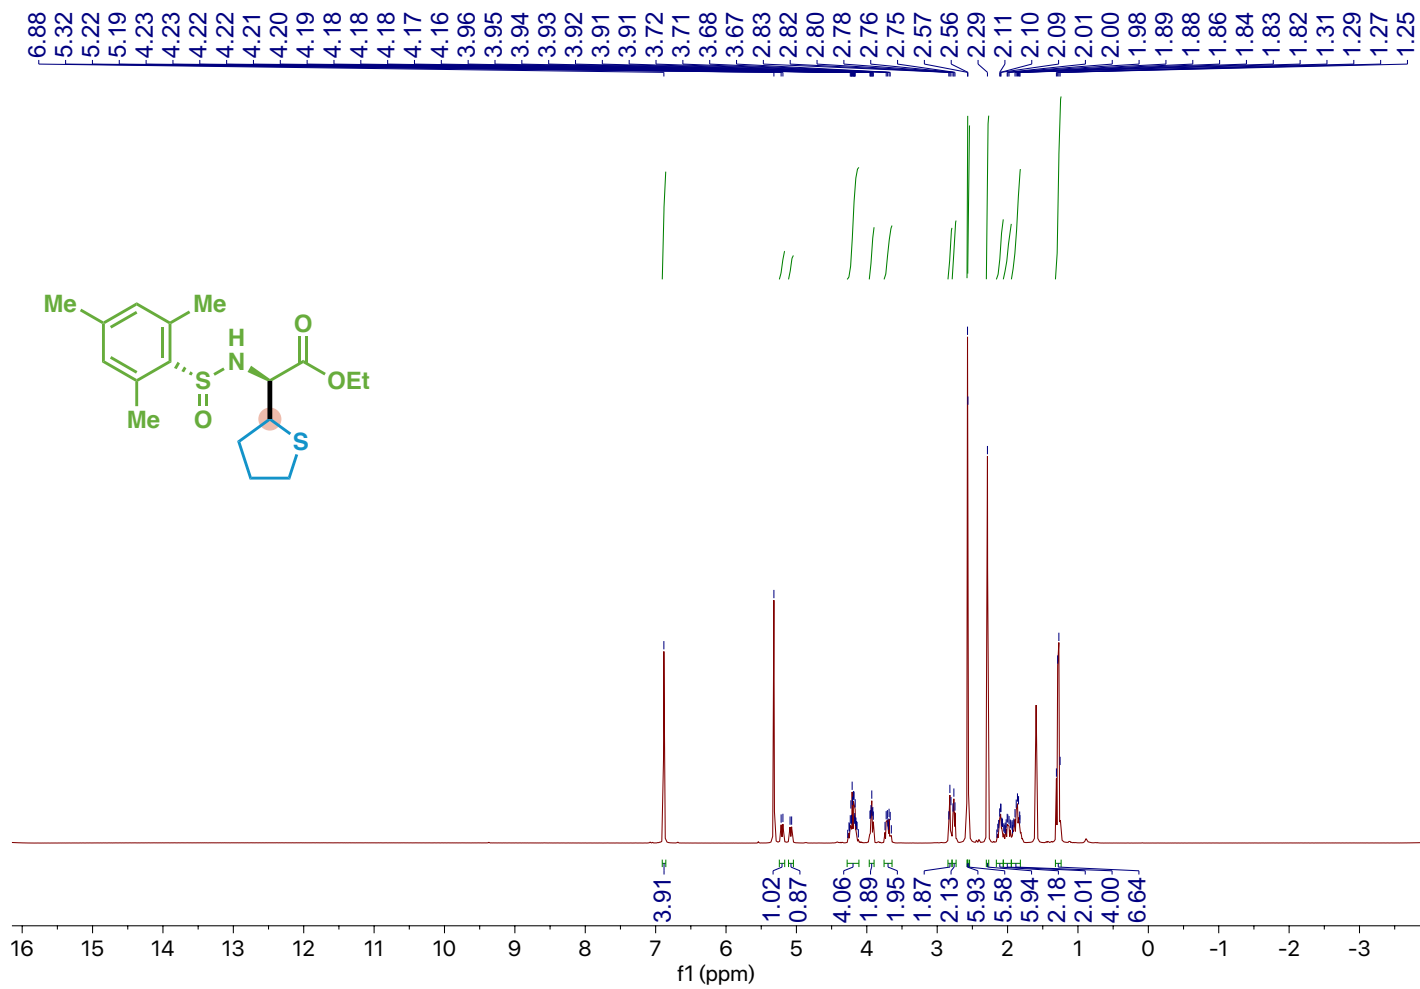

# Compound 29 <sup>13</sup>C NMR

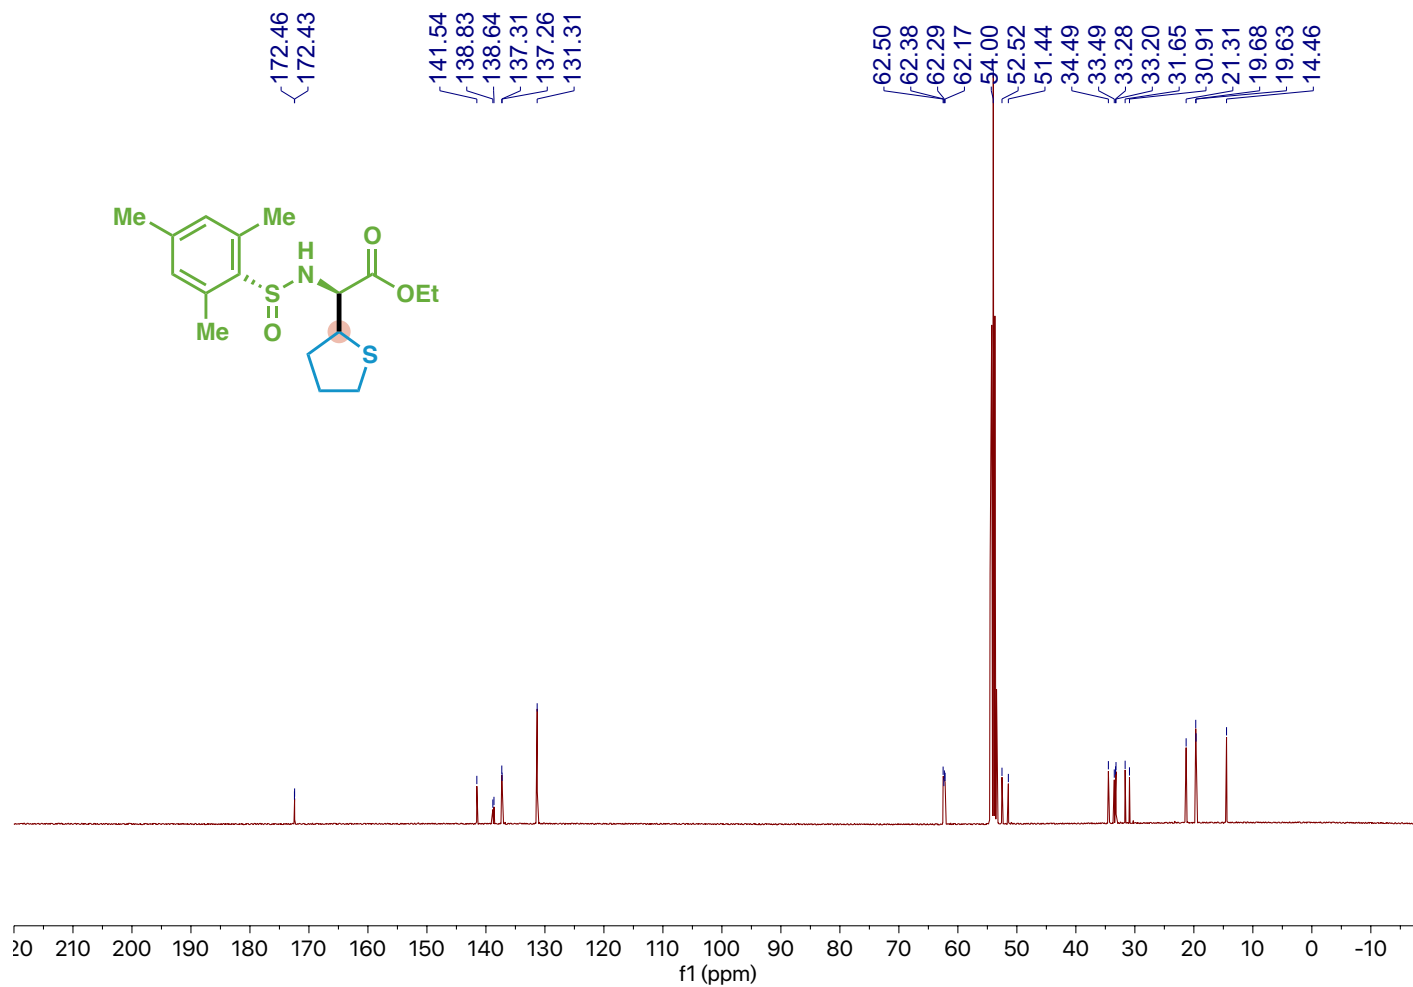

# Compound 30 <sup>1</sup>H NMR

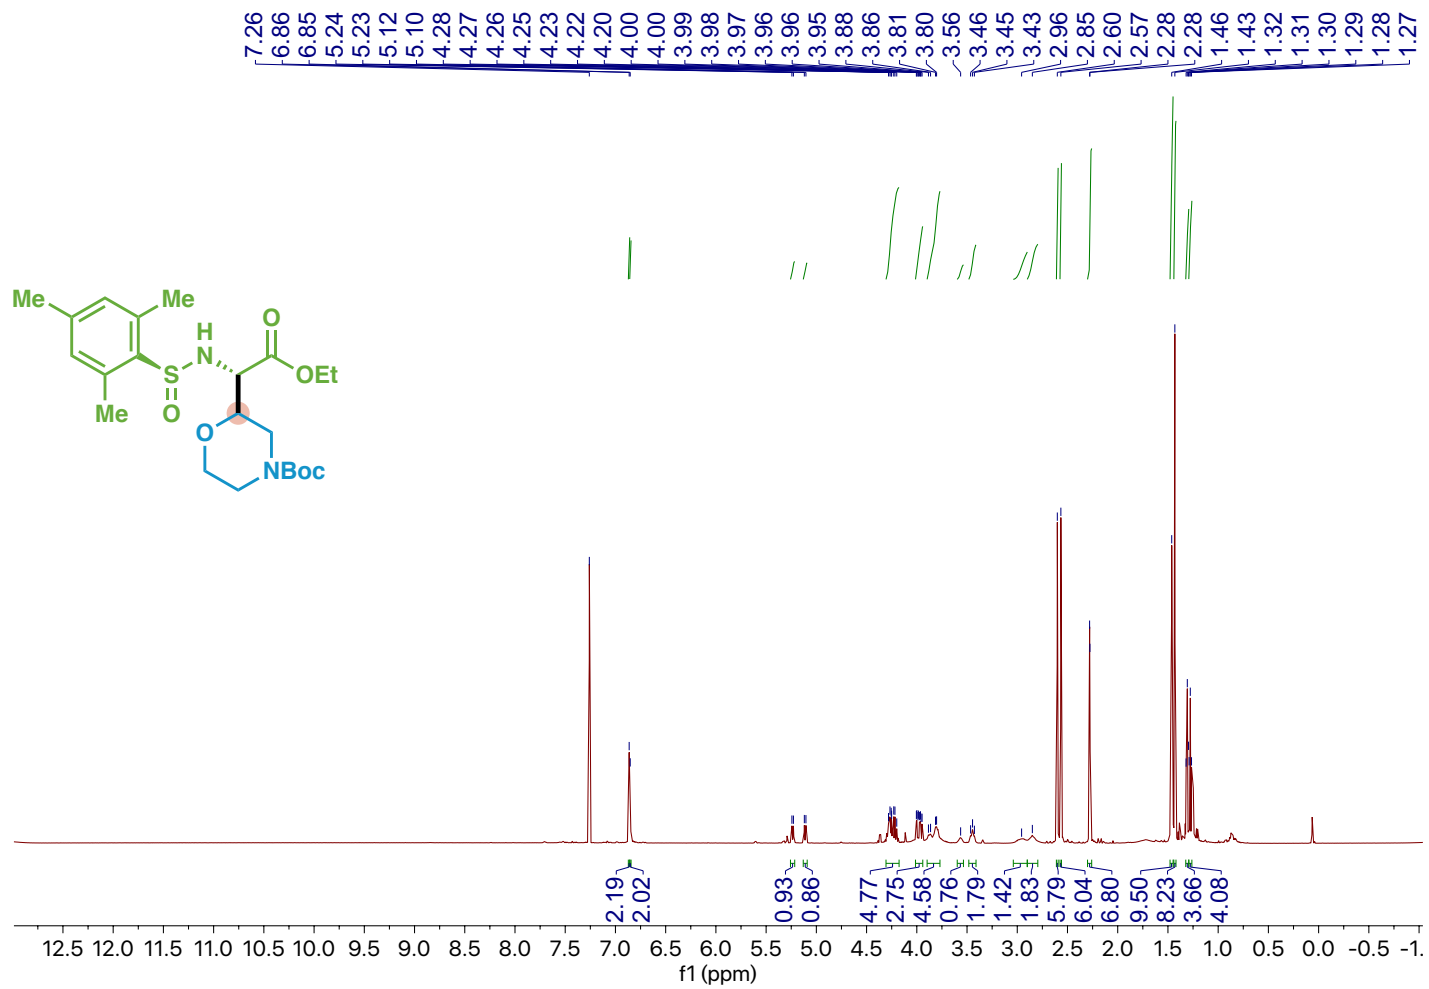

# Compound 30 <sup>13</sup>C NMR

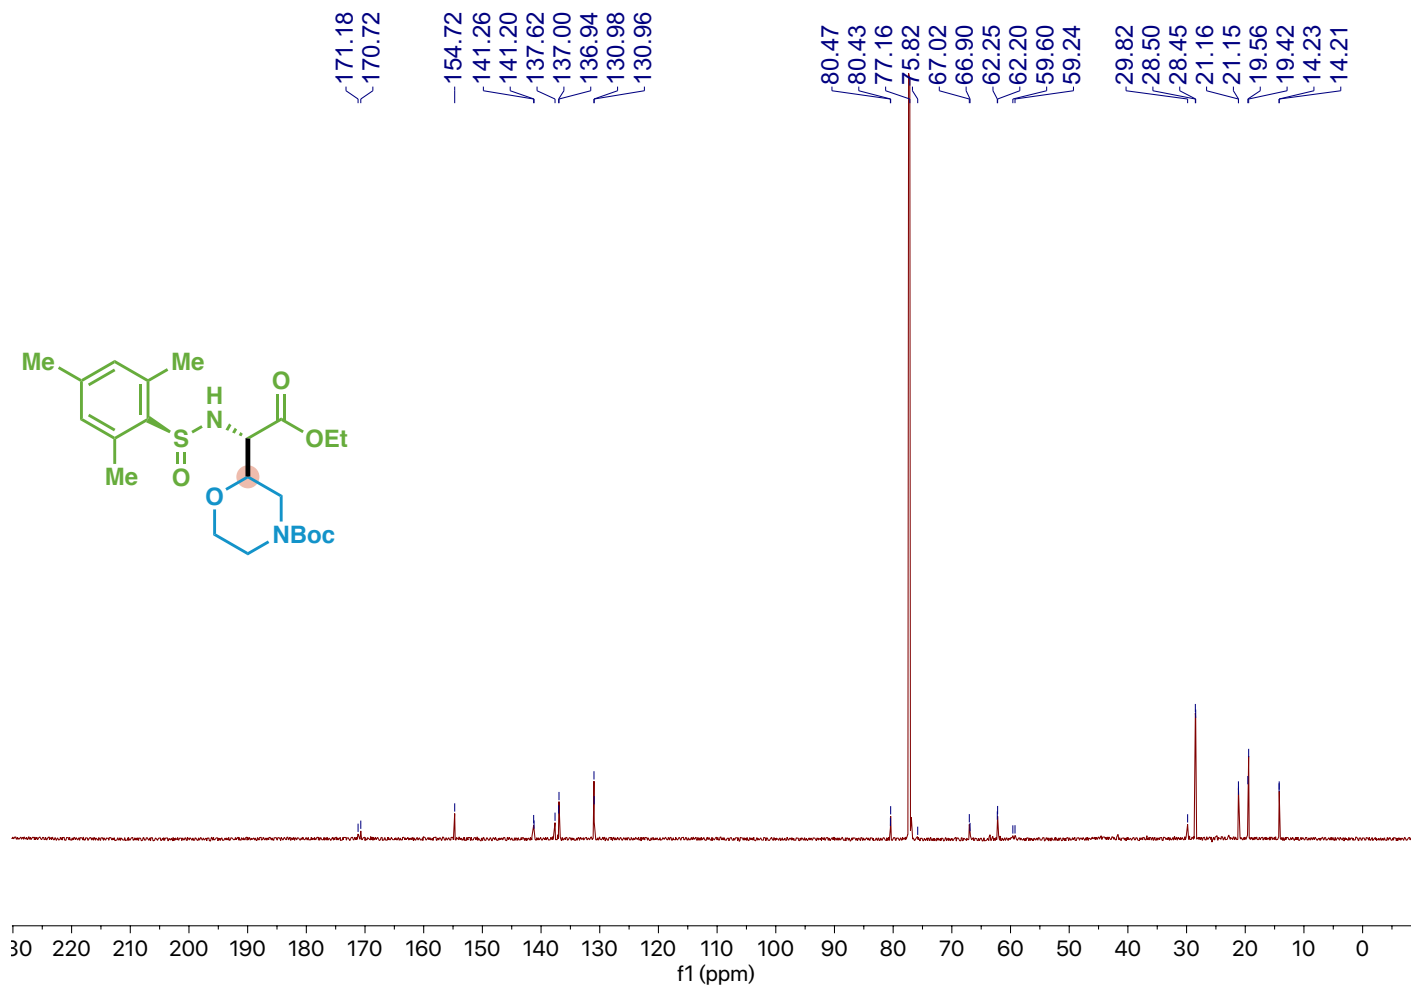

# Compound 31 <sup>1</sup>H NMR

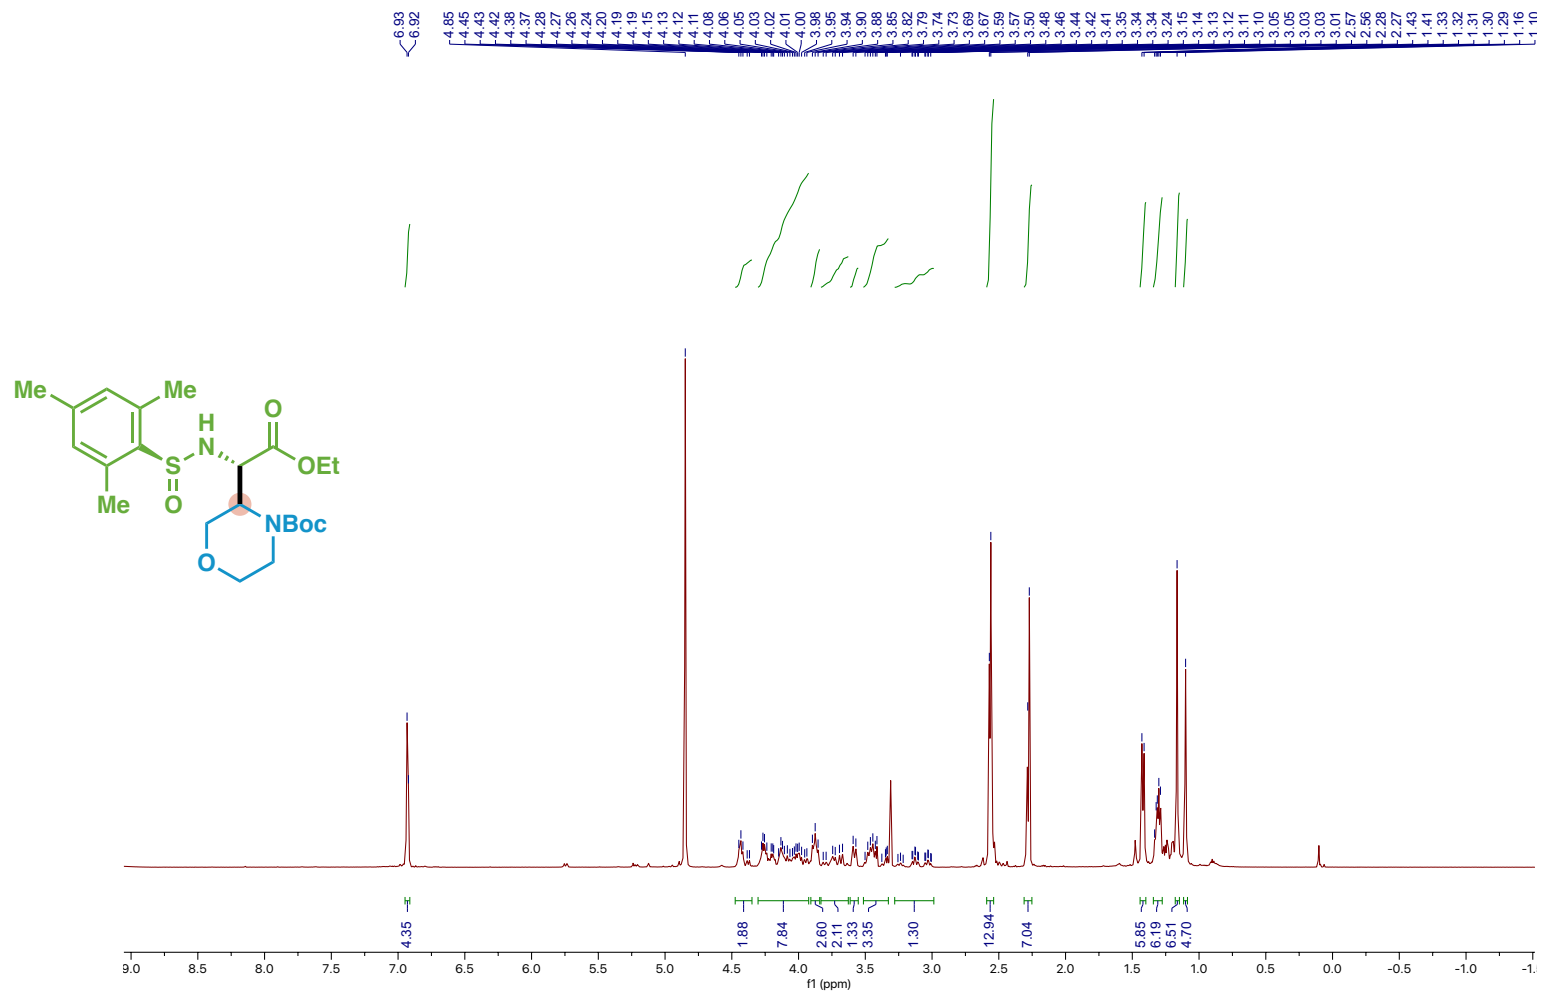

# Compound 31 <sup>13</sup>C NMR

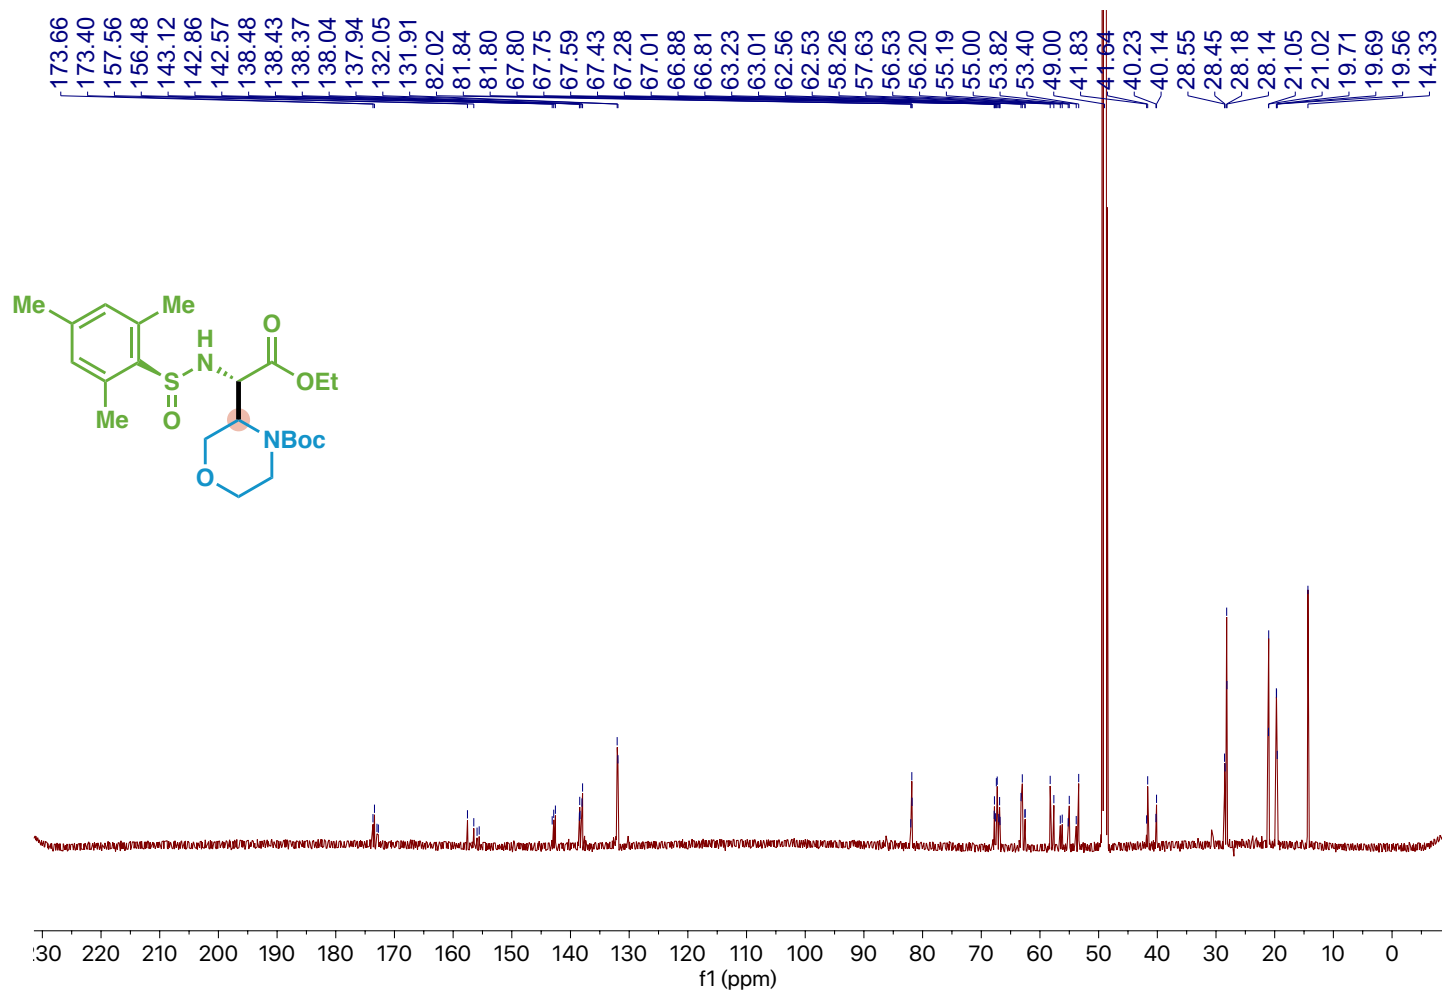



# Compound 32 <sup>1</sup>H NMR

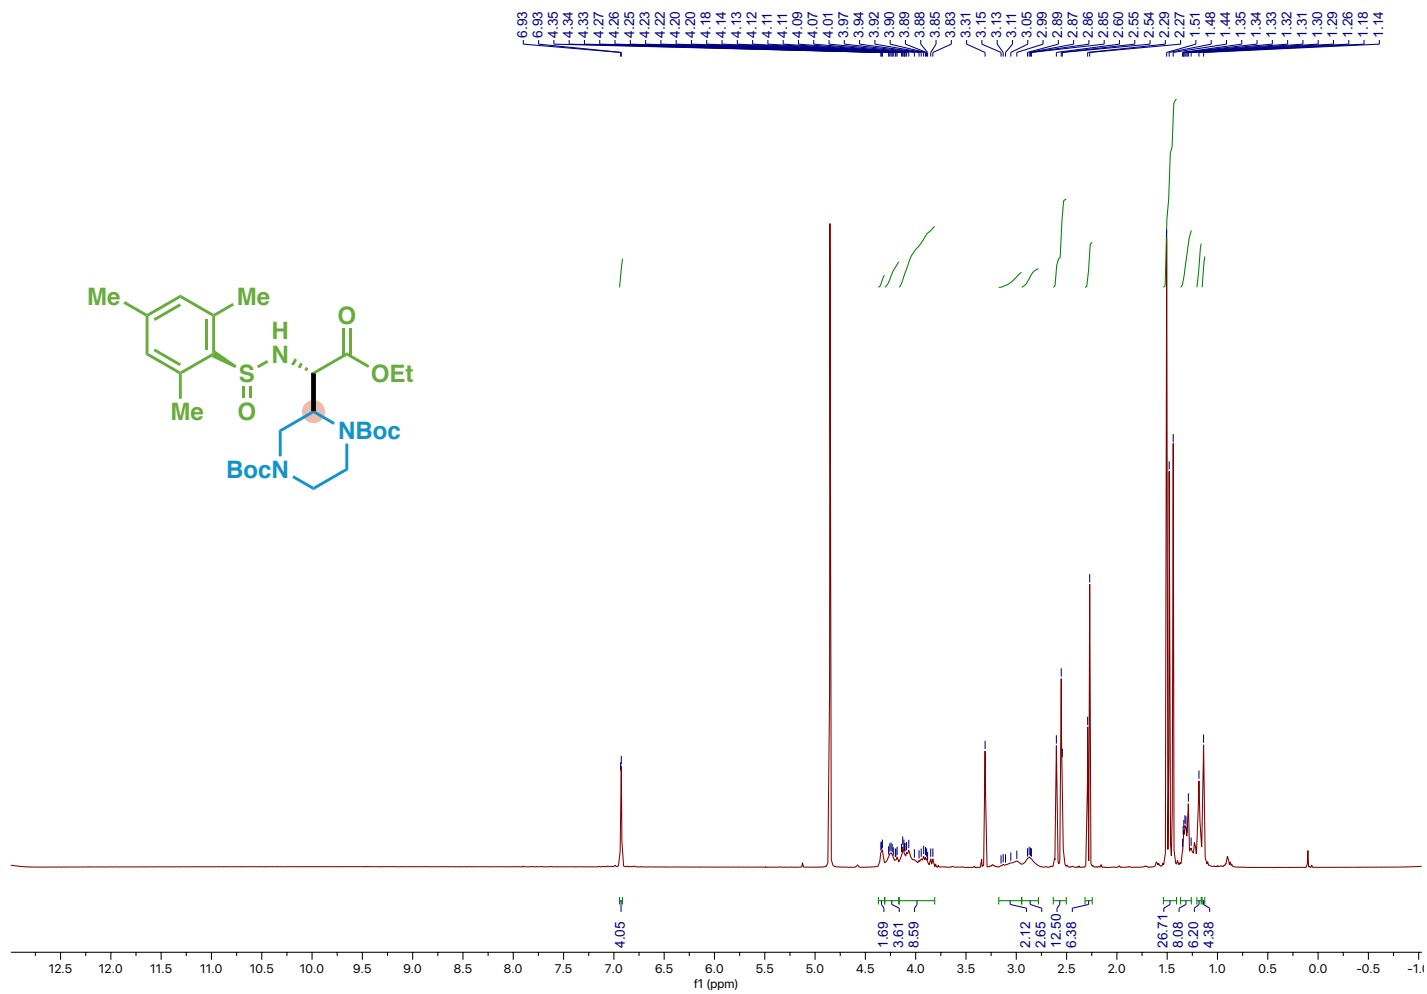

# Compound 32 <sup>13</sup>C NMR

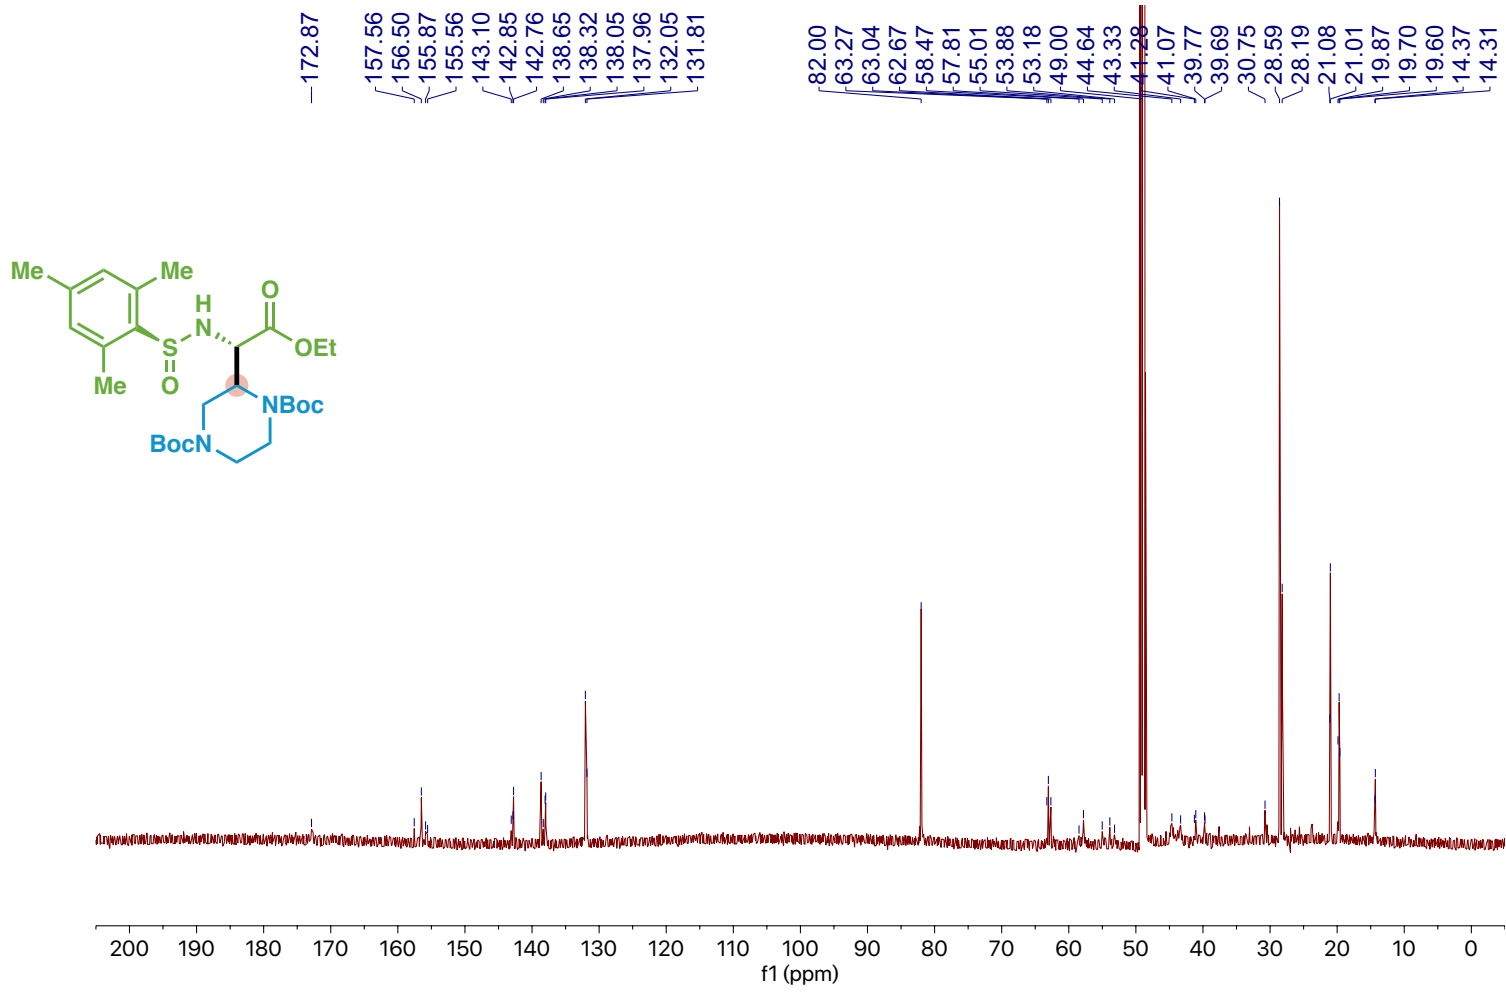

# Compound 33 <sup>1</sup>H NMR

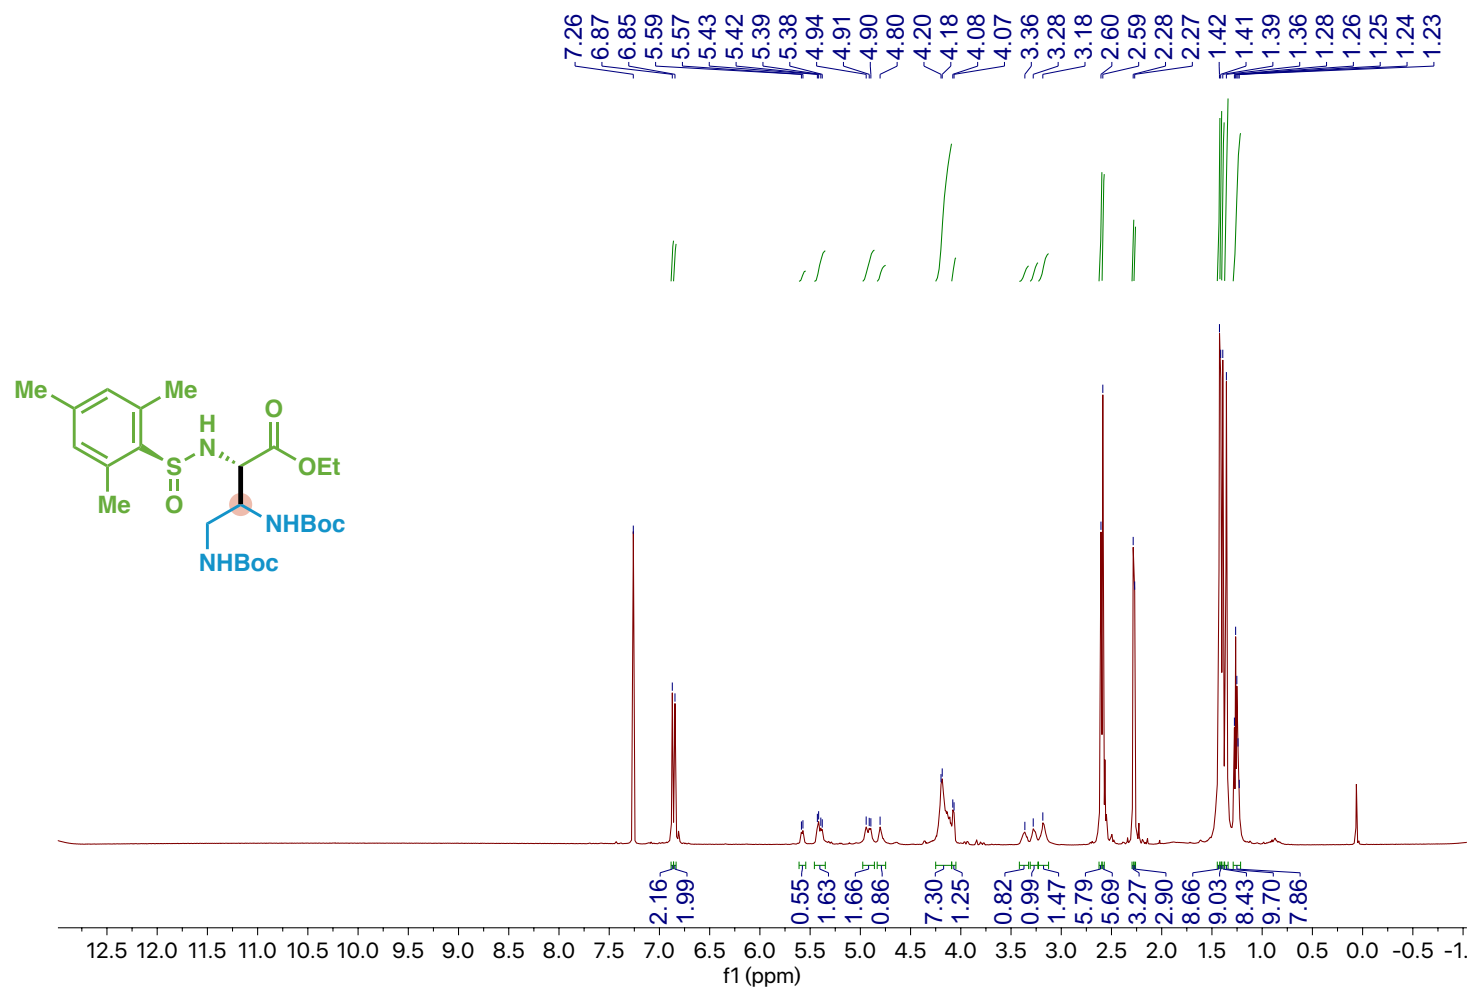

# Compound 33 <sup>13</sup>C NMR

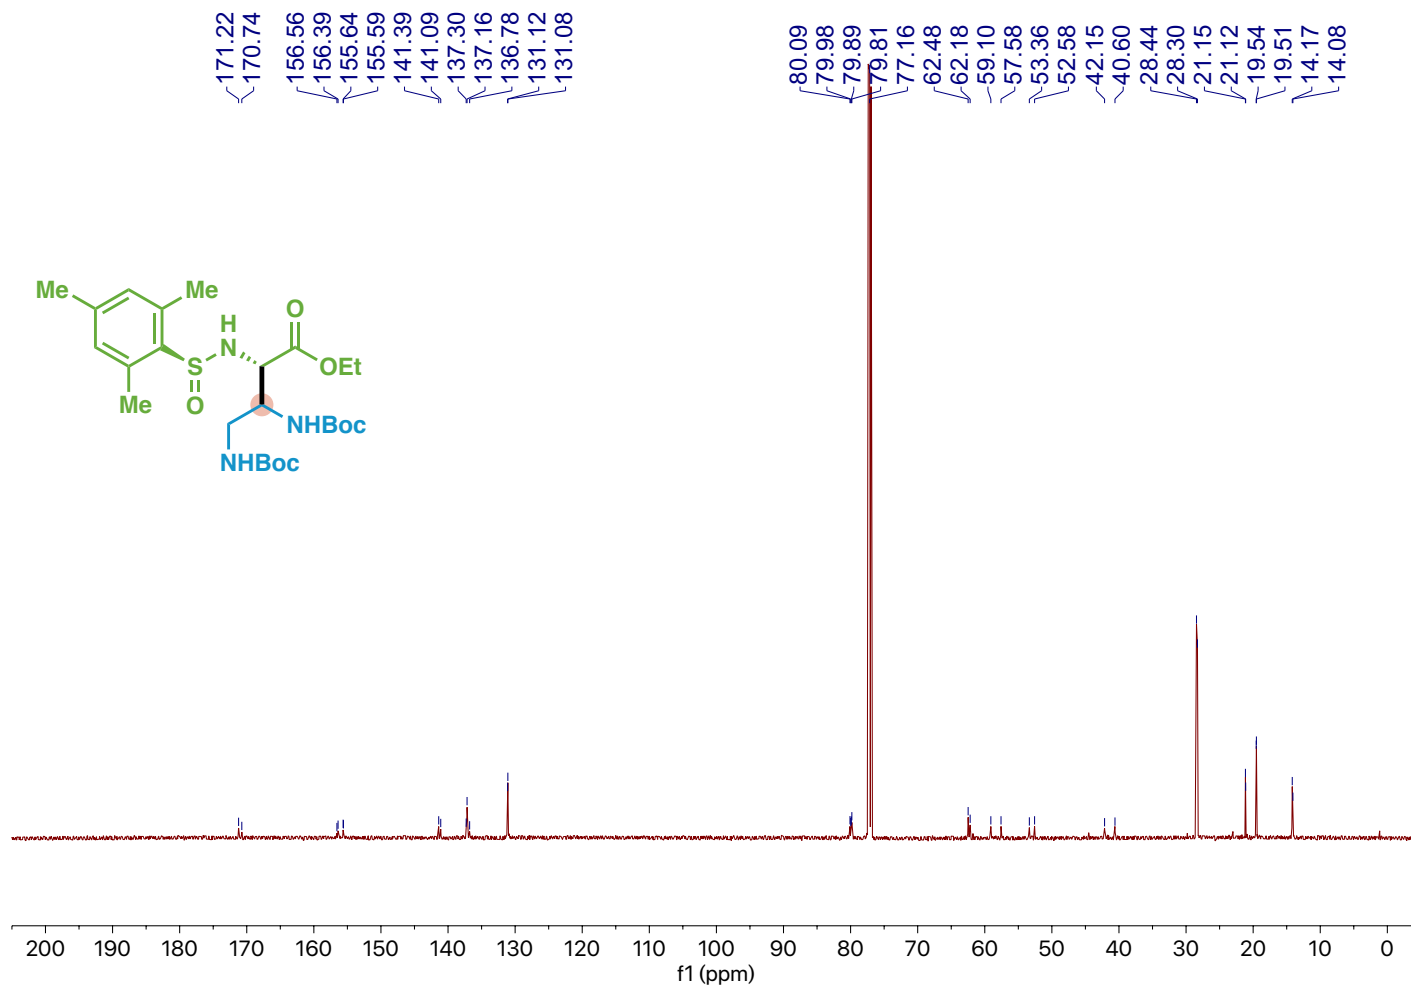

# Compound 34 <sup>1</sup>H NMR

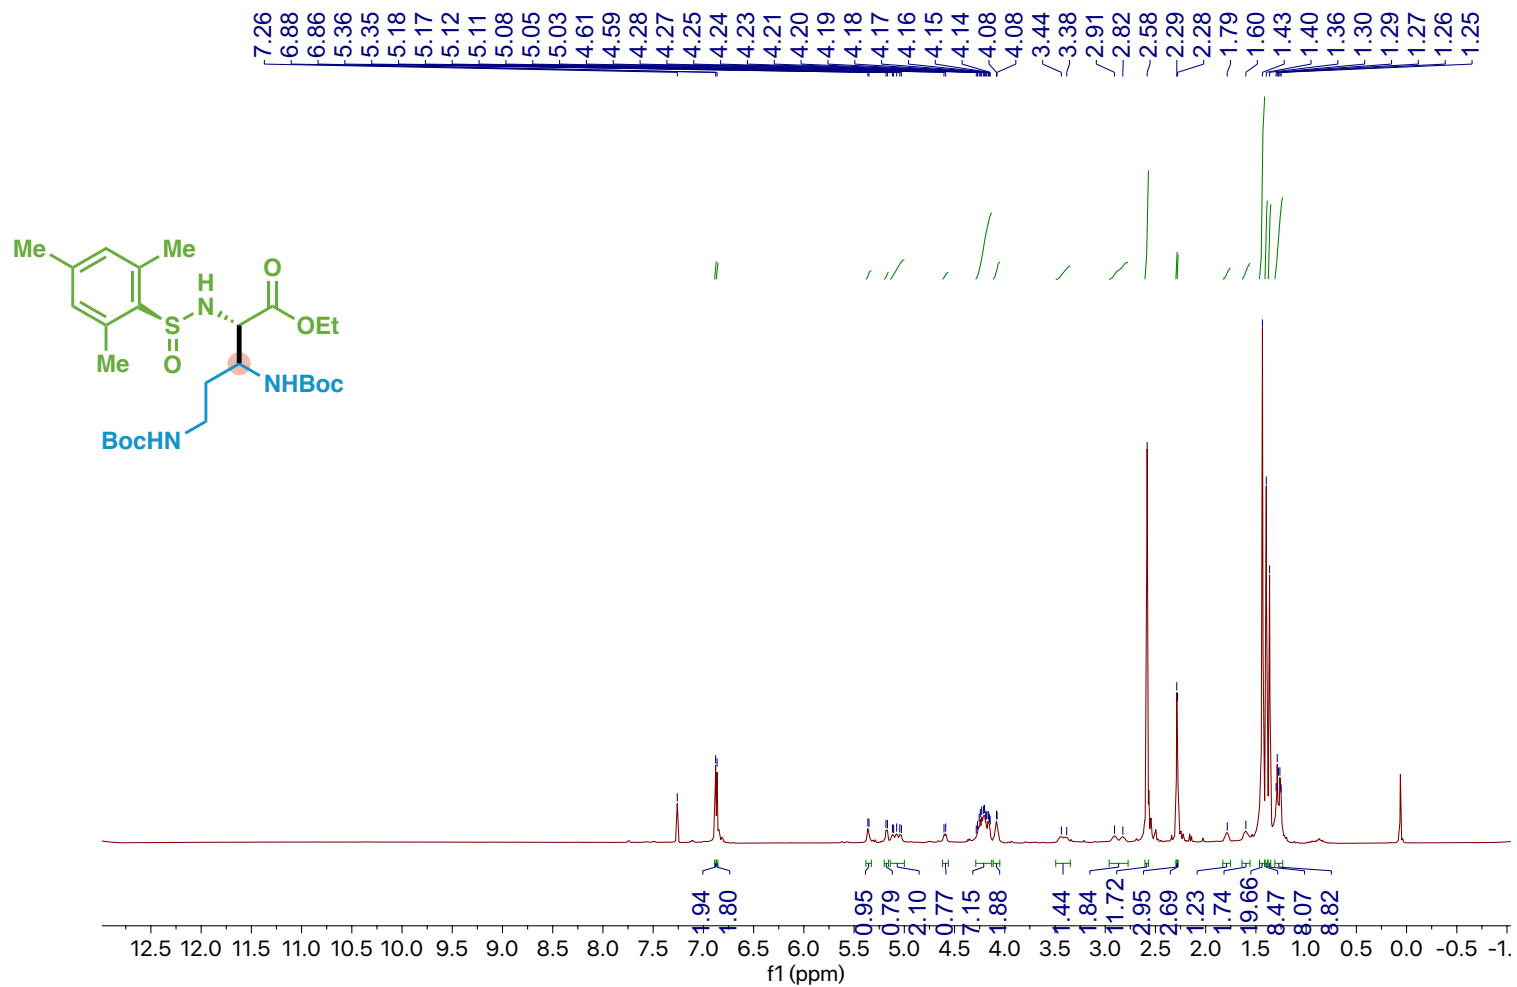

# Compound 34 <sup>13</sup>C NMR

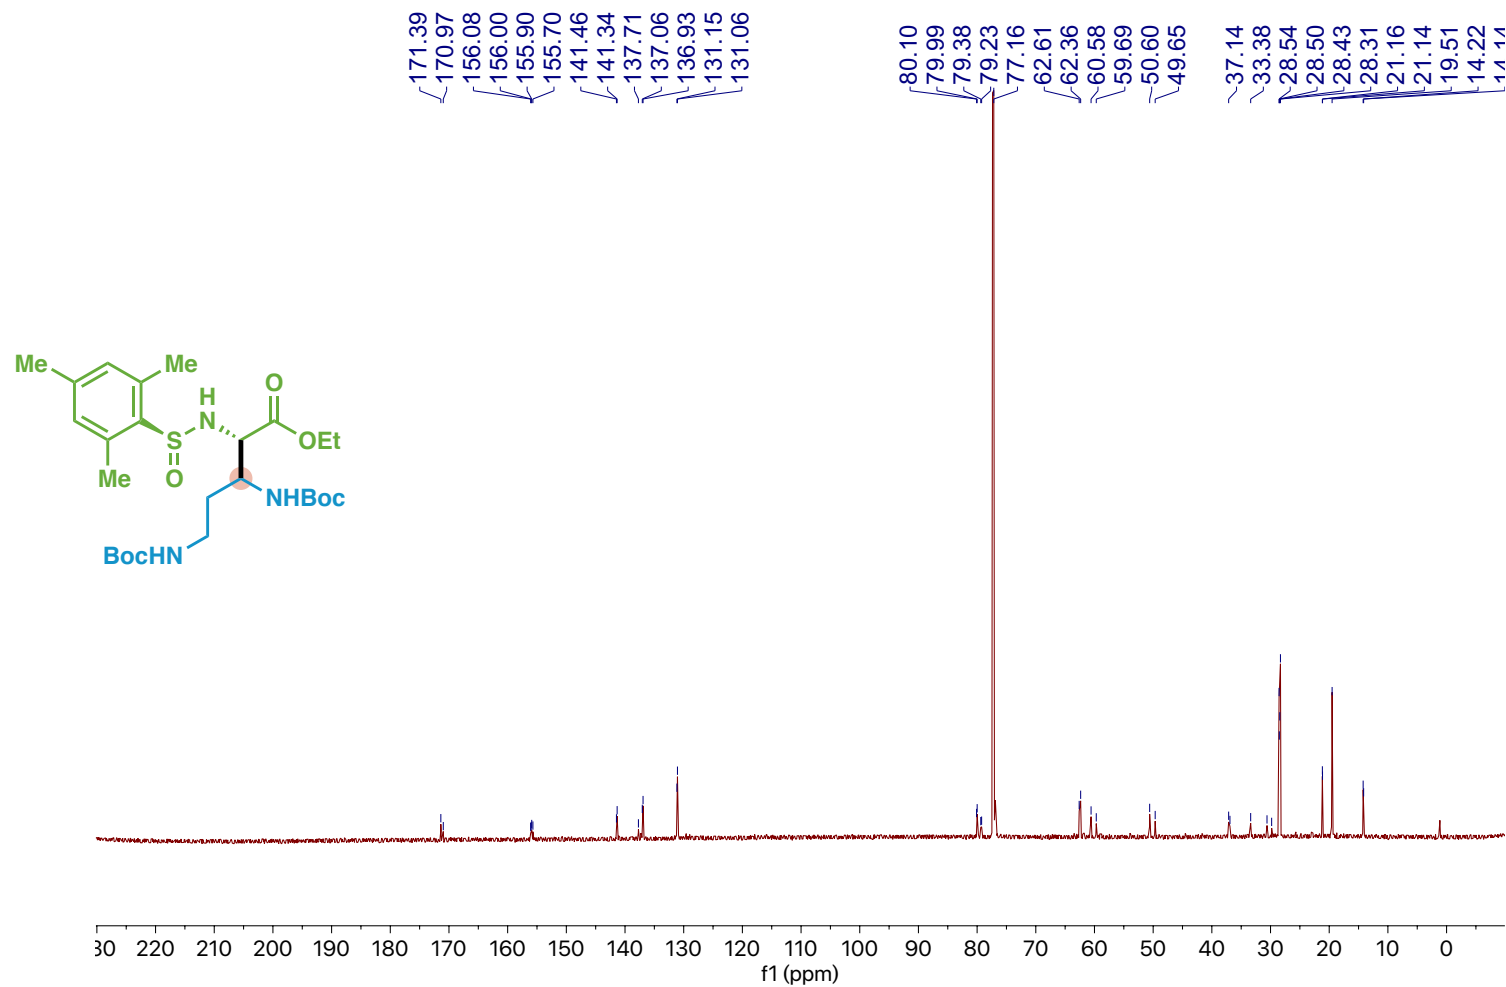

# Compound 35 <sup>1</sup>H NMR

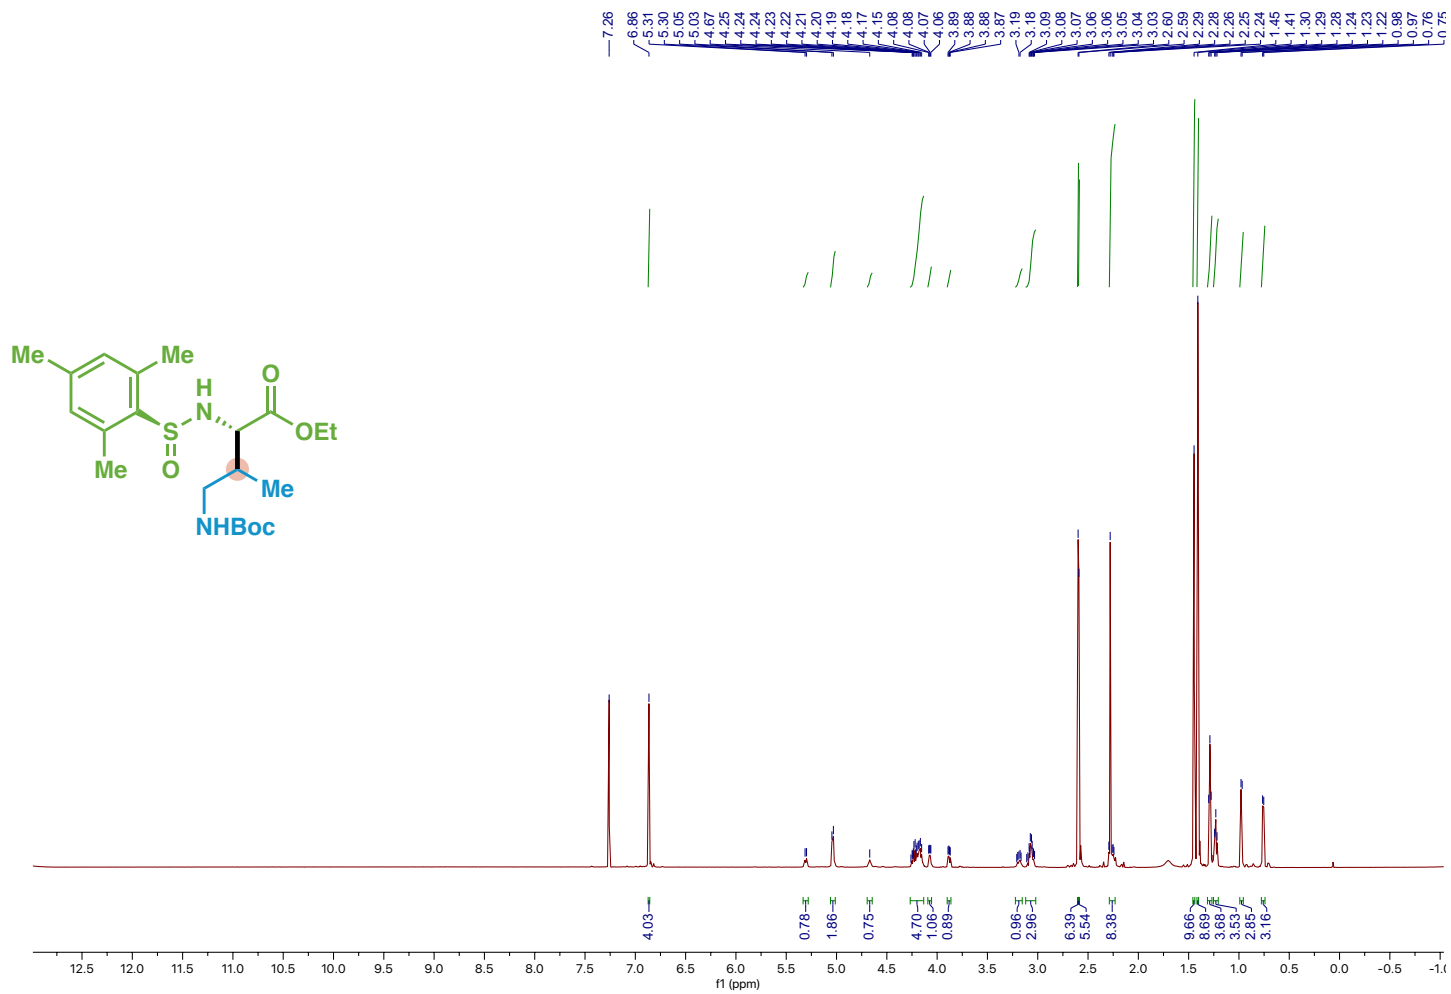

# Compound 35 <sup>13</sup>C NMR

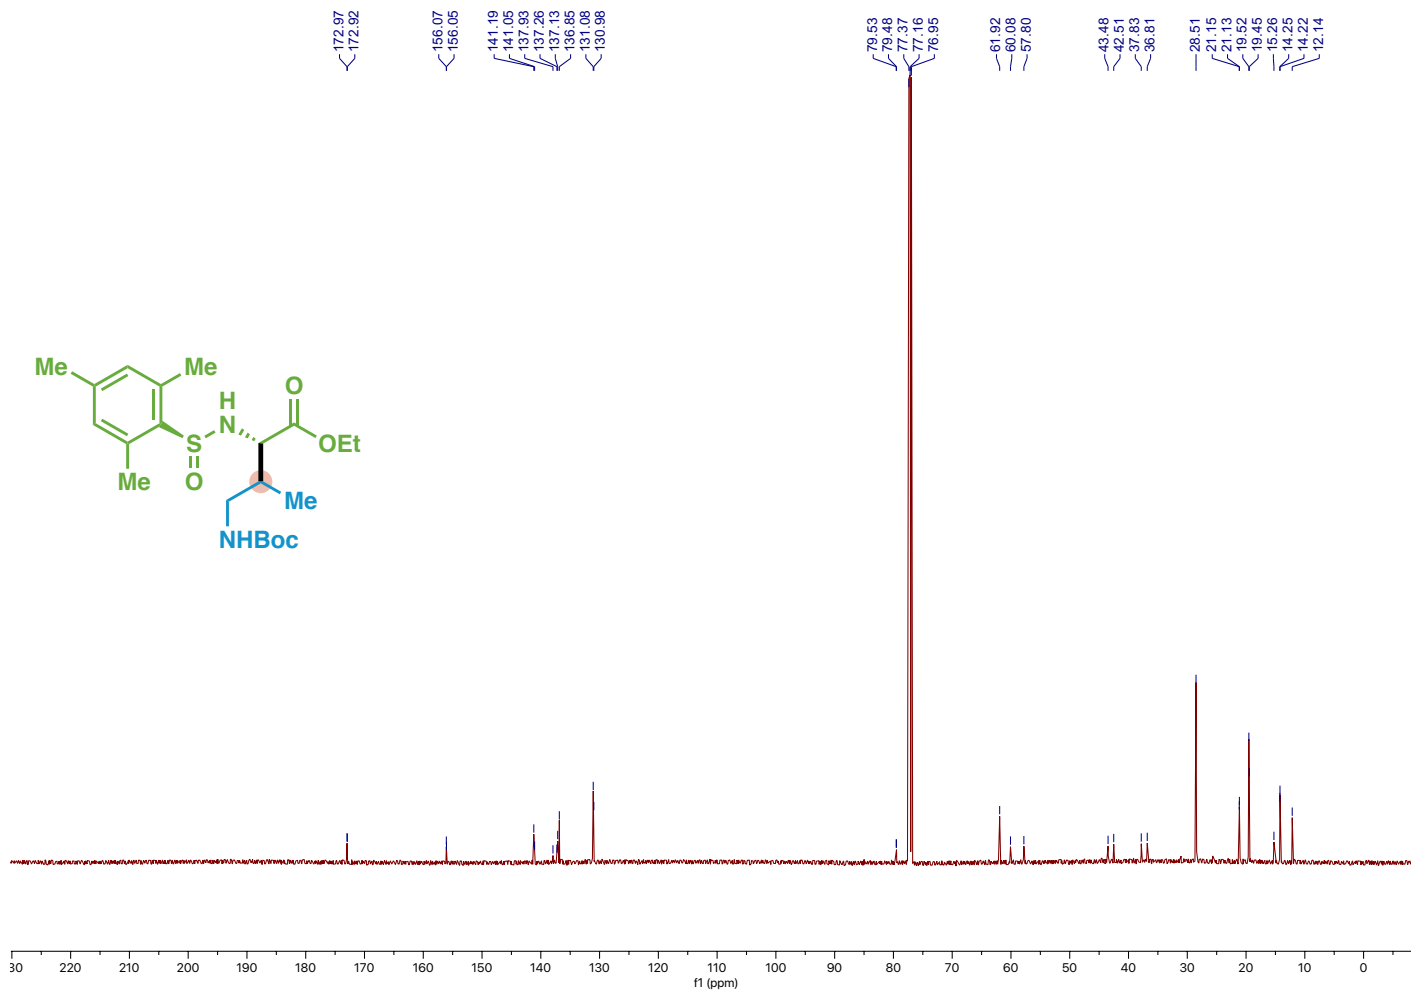



# Compound 36 <sup>1</sup>H NMR

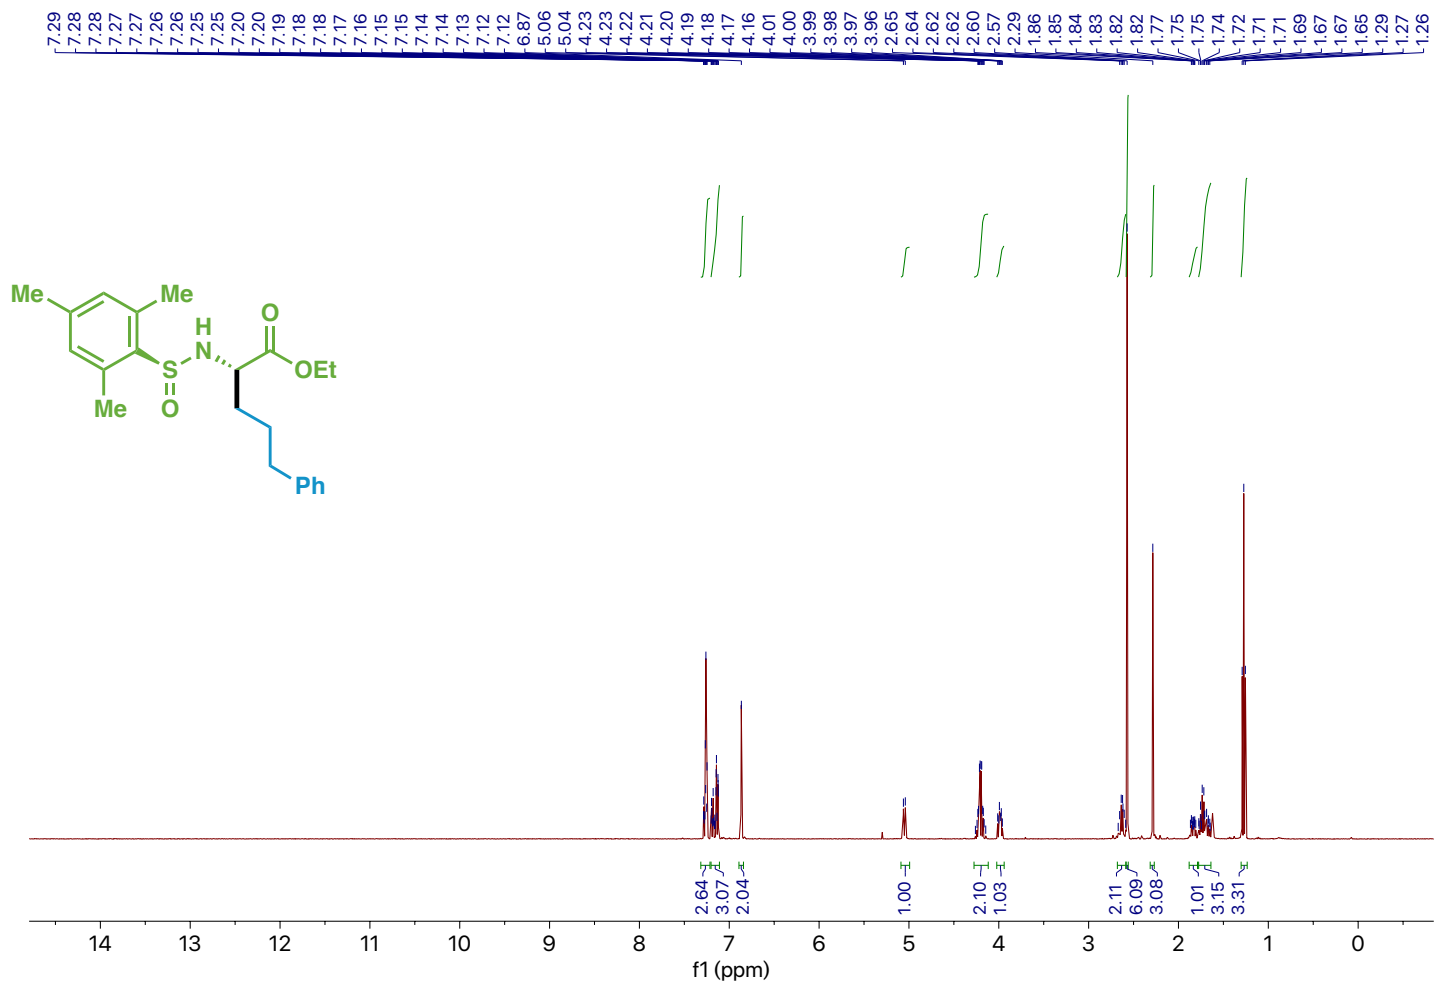

# Compound 36 <sup>13</sup>C NMR

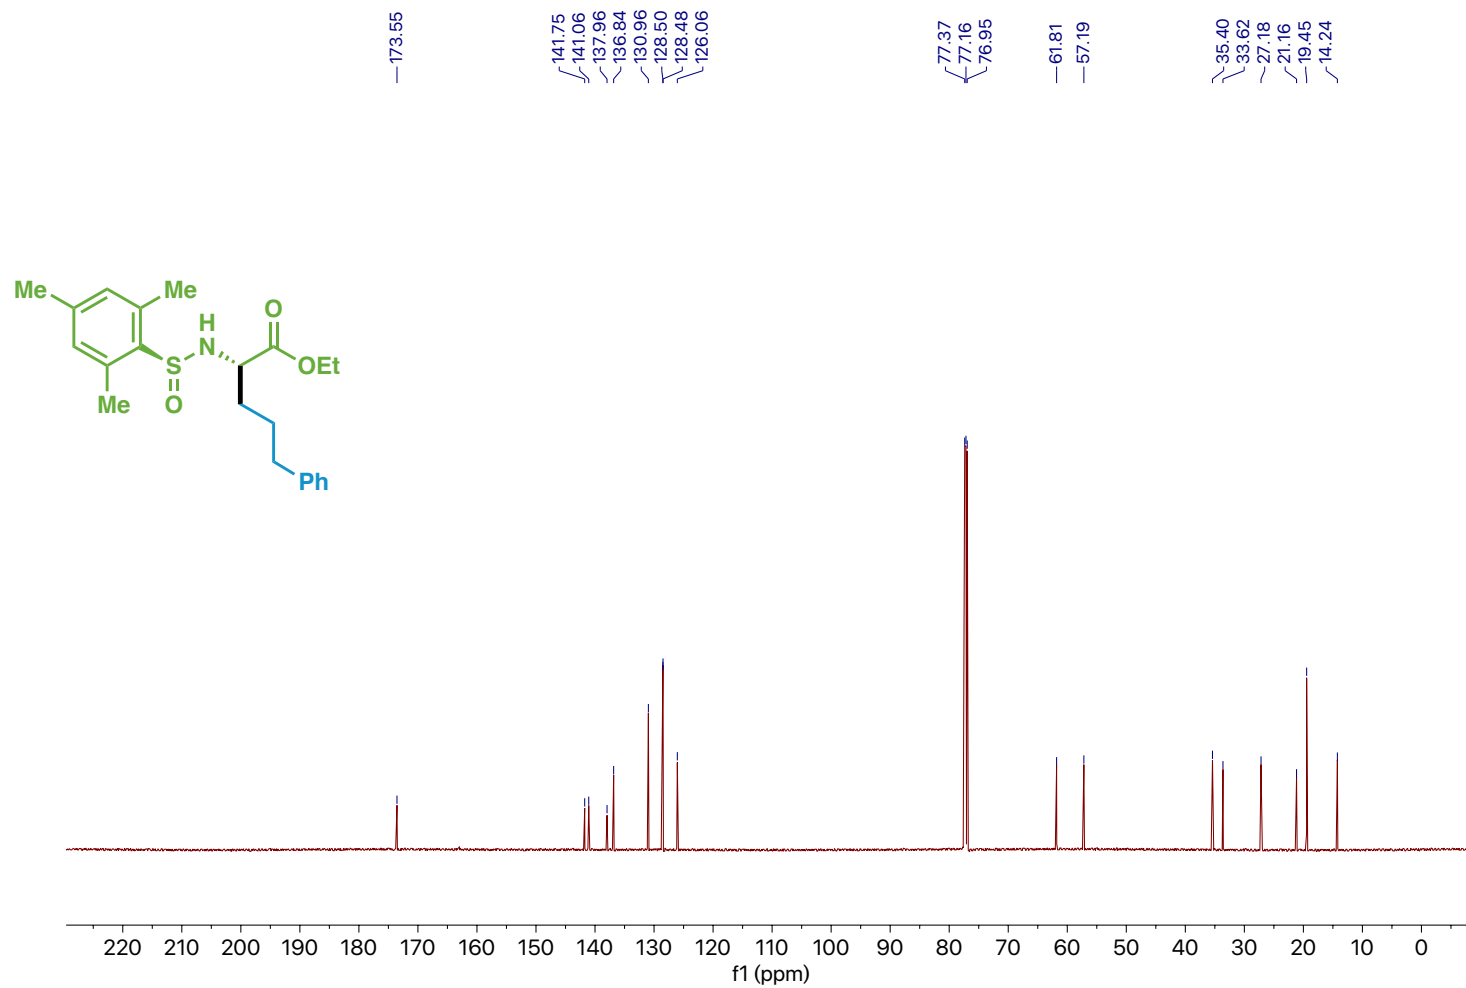

# Compound 37 <sup>1</sup>H NMR

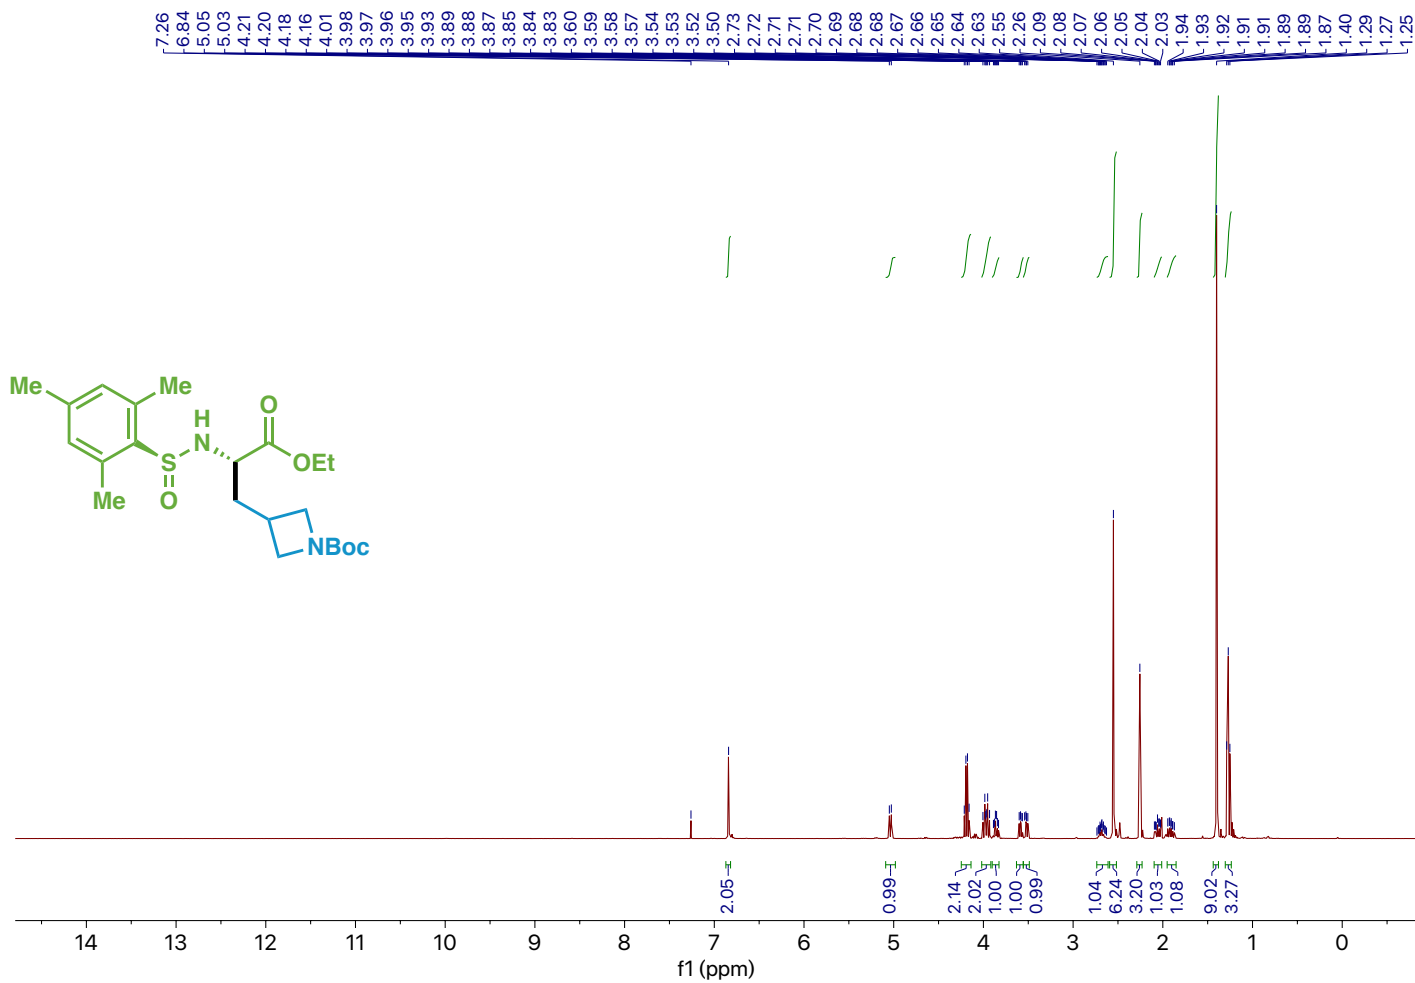

# Compound 37 <sup>13</sup>C NMR

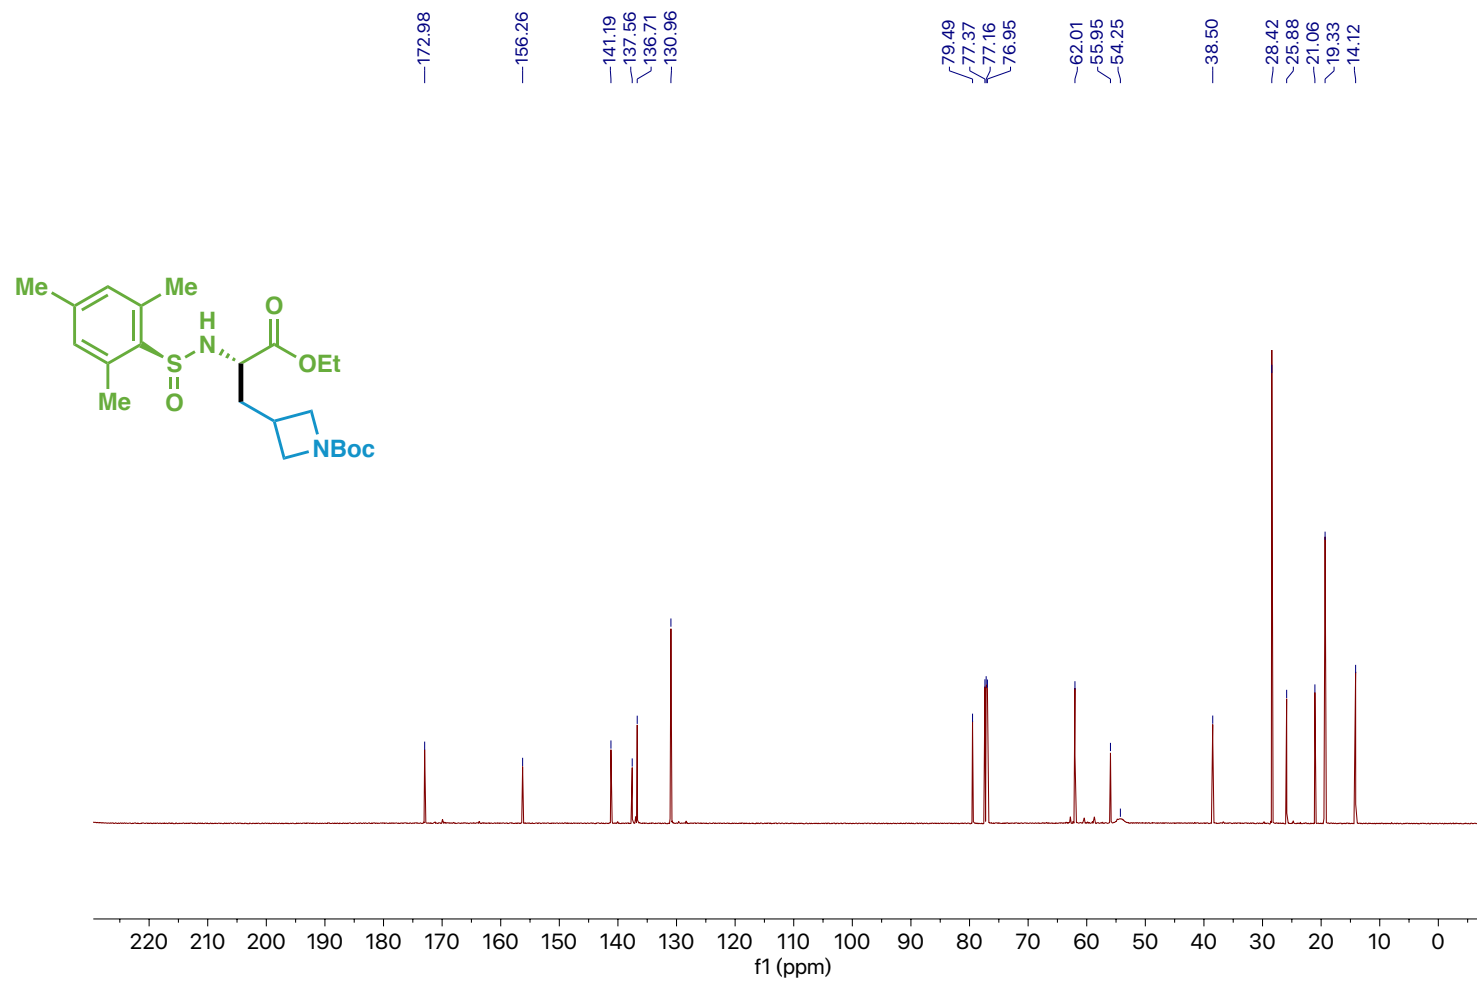

# Compound 38 <sup>1</sup>H NMR

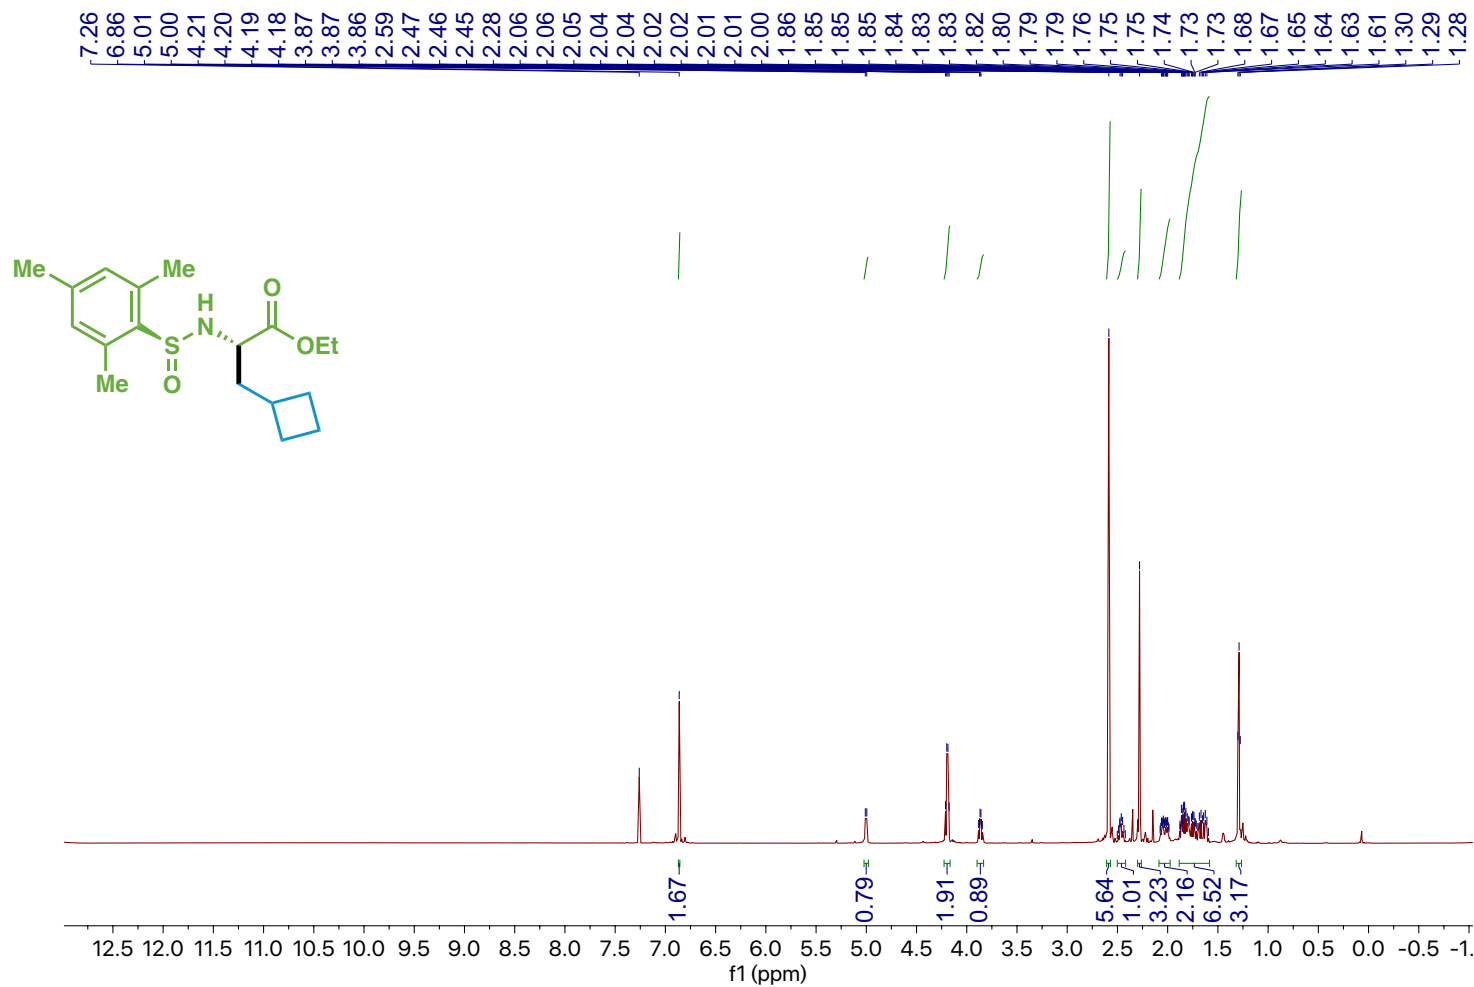

# Compound 38 <sup>13</sup>C NMR

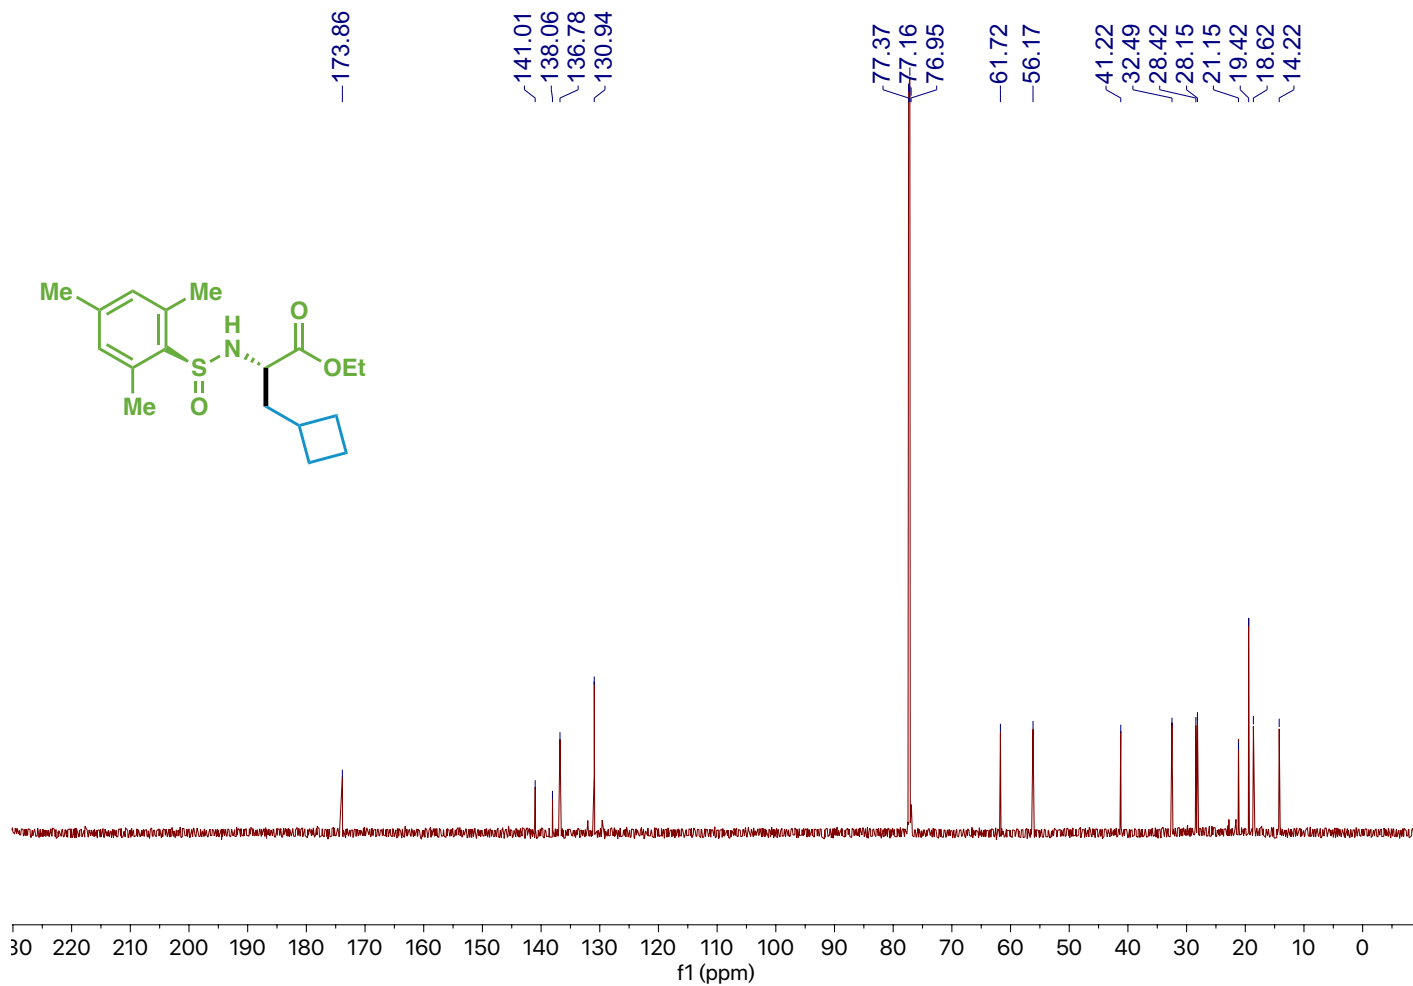

# Compound 39 <sup>1</sup>H NMR

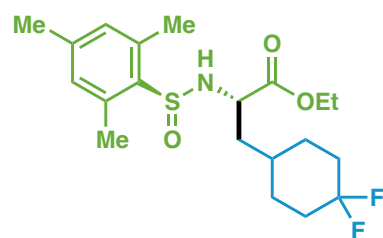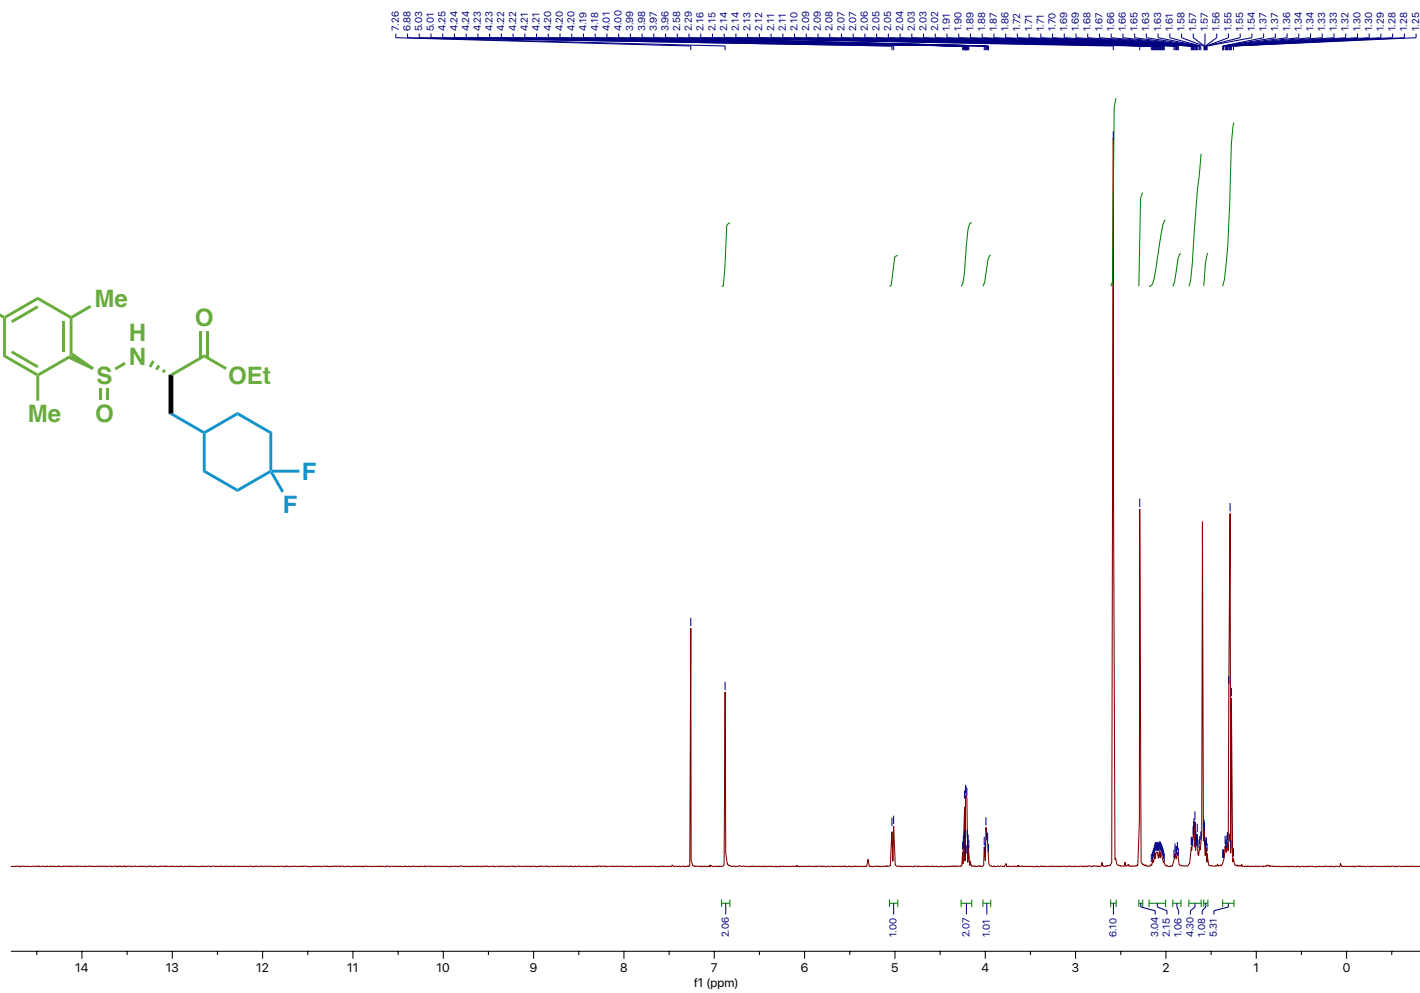

# Compound 39 <sup>13</sup>C NMR

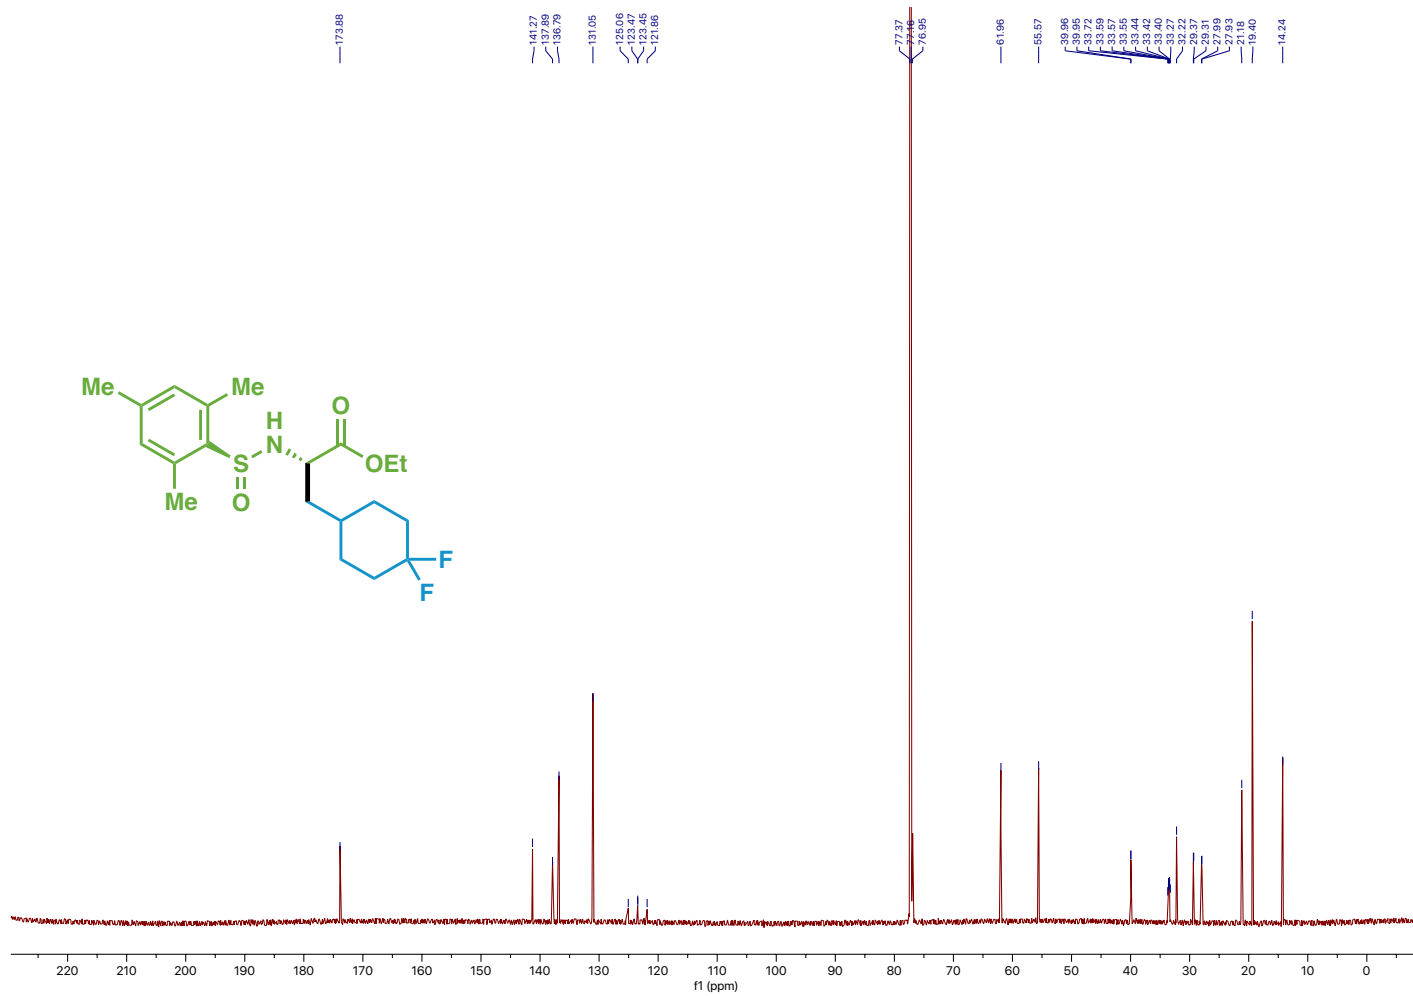



# Compound 39 <sup>19</sup>F NMR

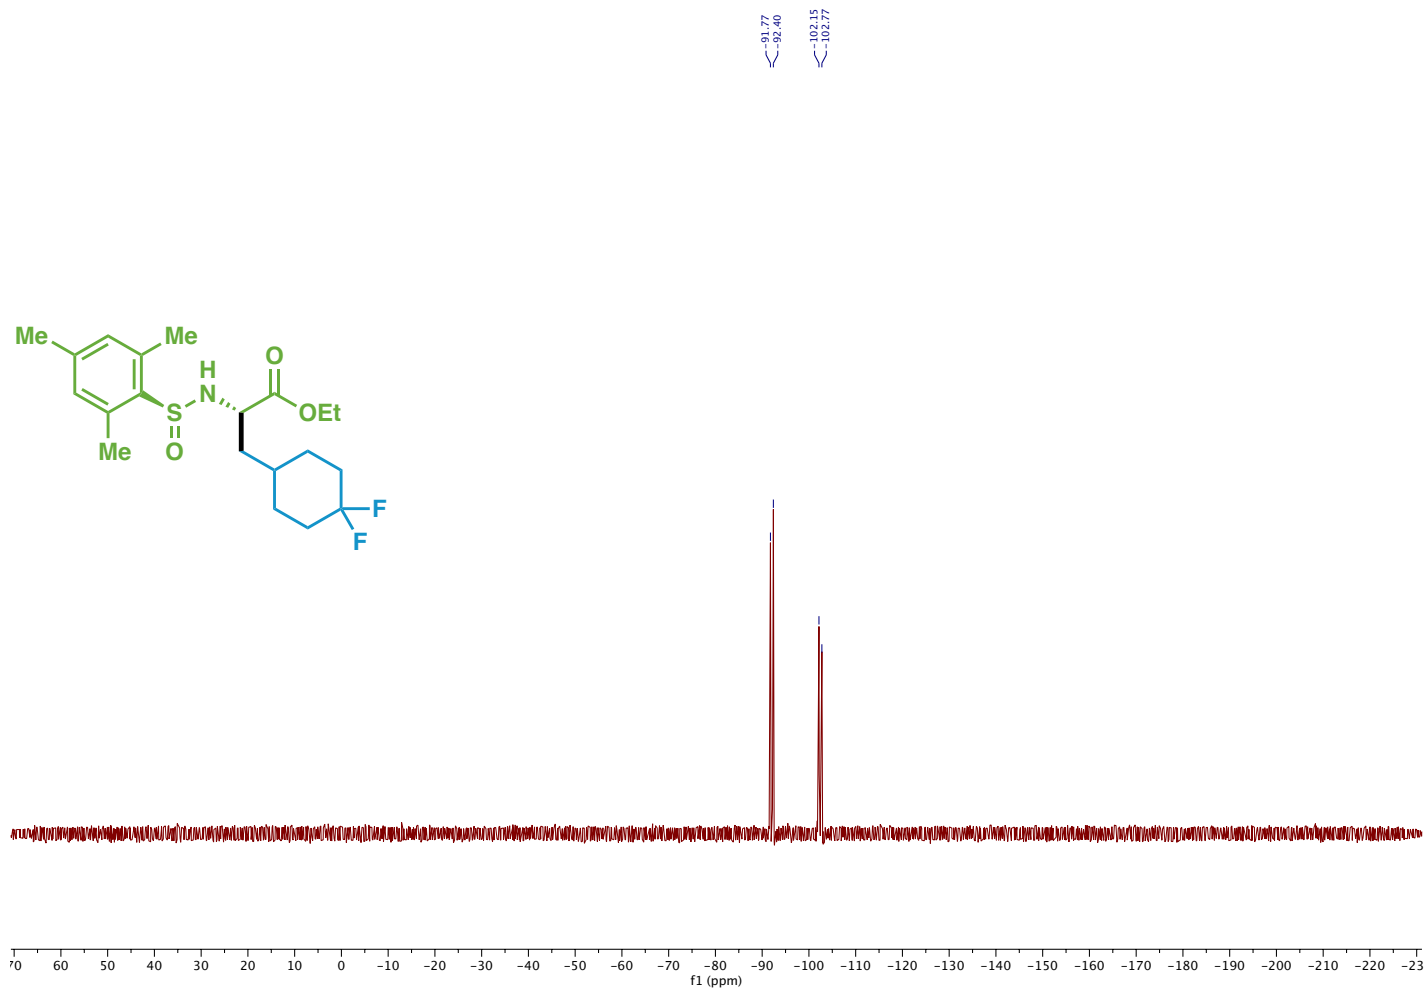

# Compound 40 <sup>1</sup>H NMR

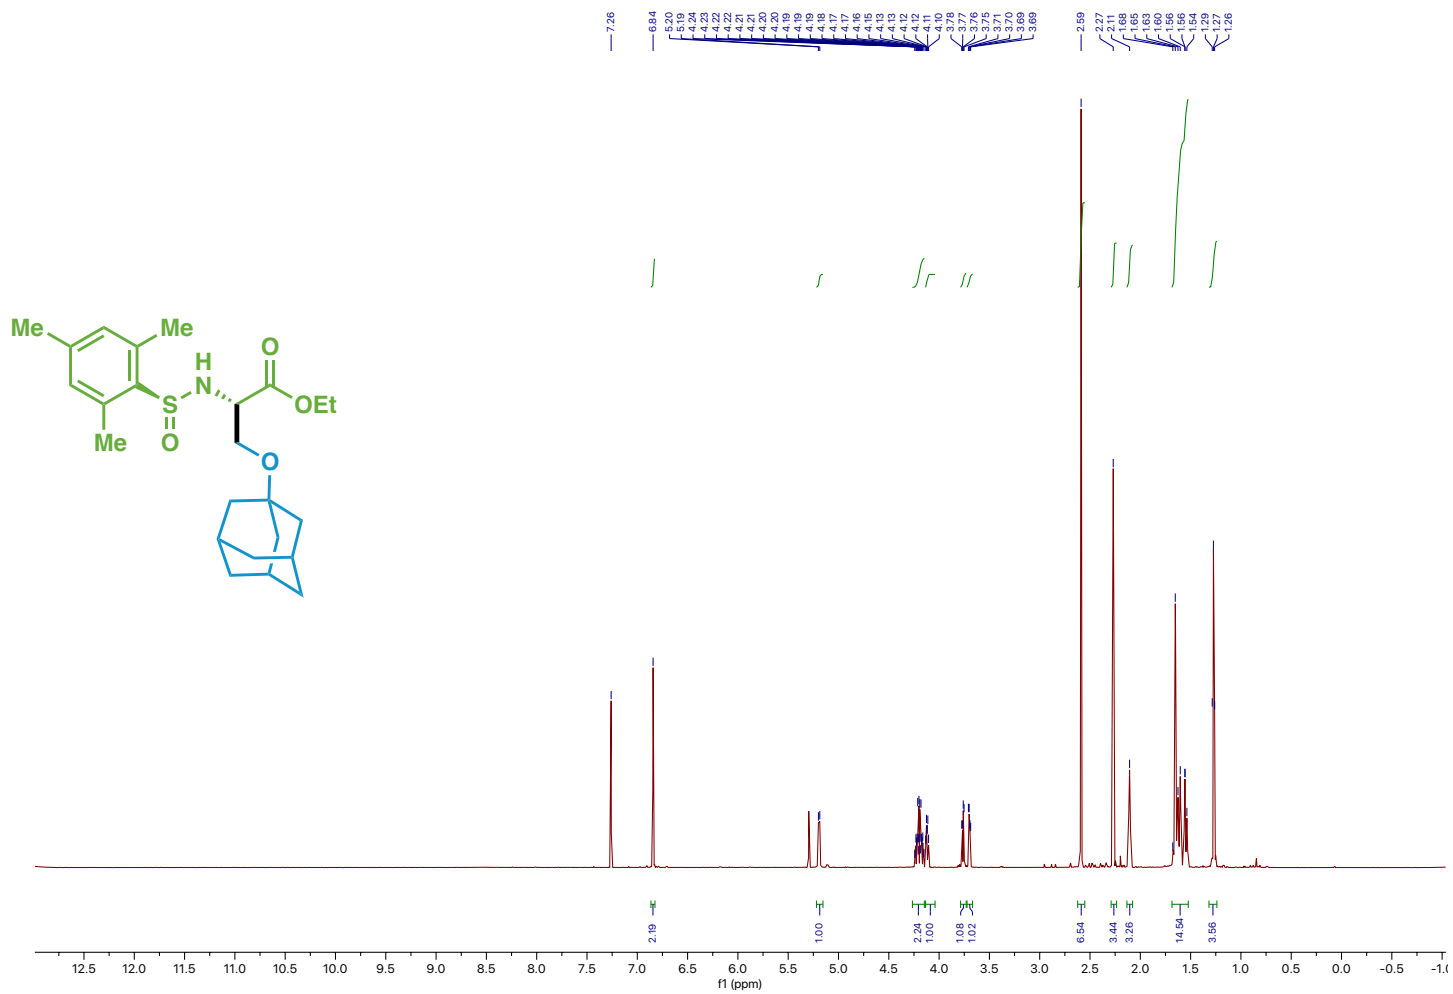

# Compound 40 <sup>13</sup>C NMR

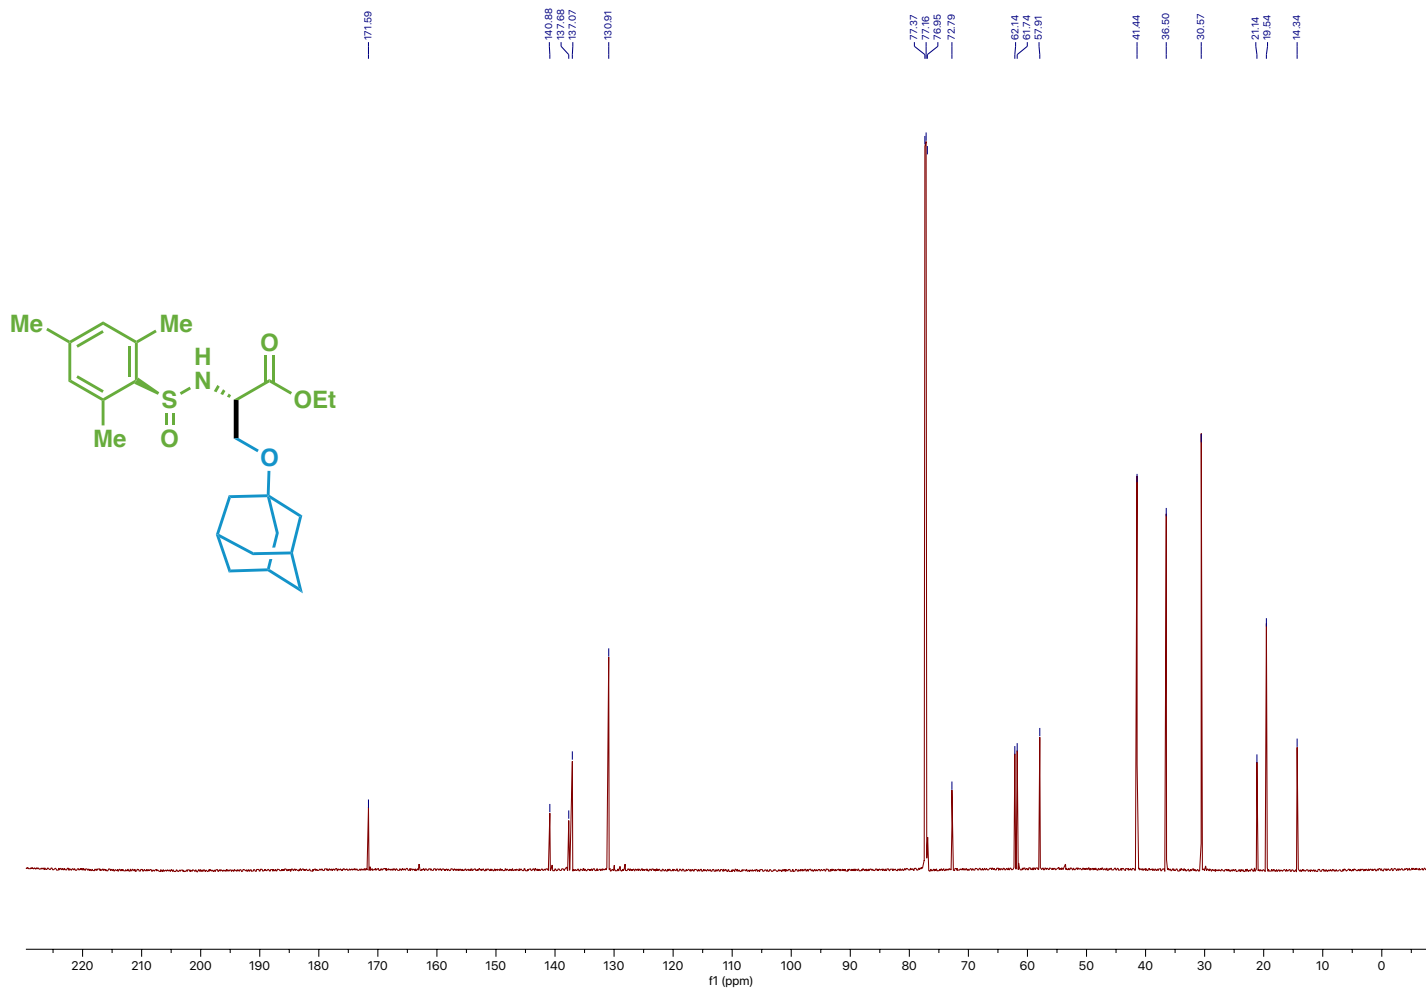

# Compound 41 <sup>1</sup>H NMR

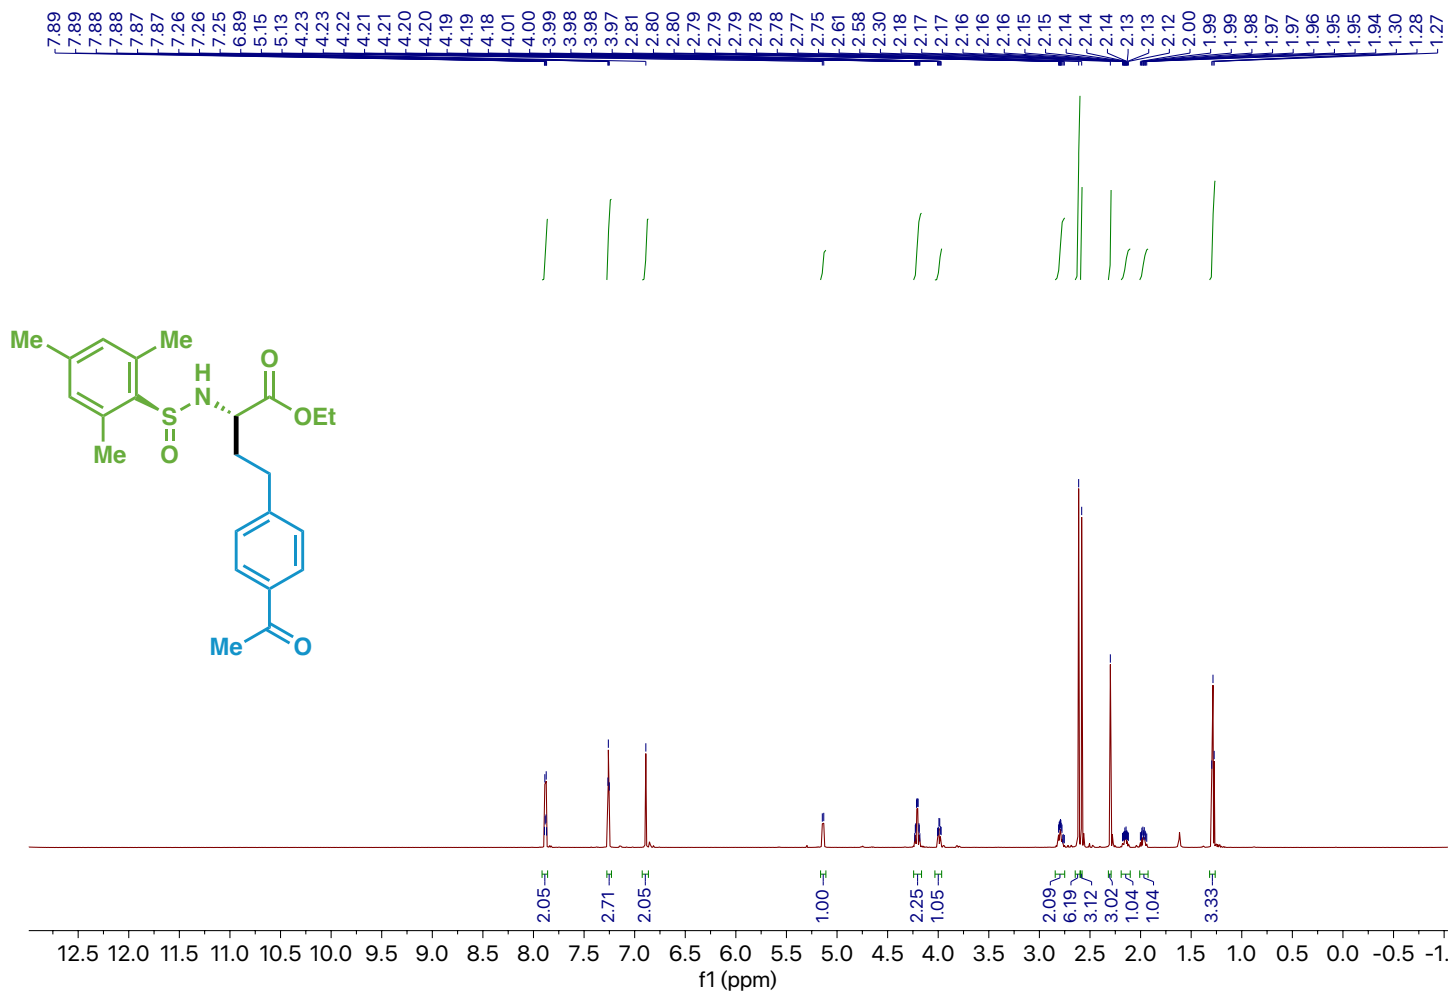

# Compound 41 <sup>13</sup>C NMR

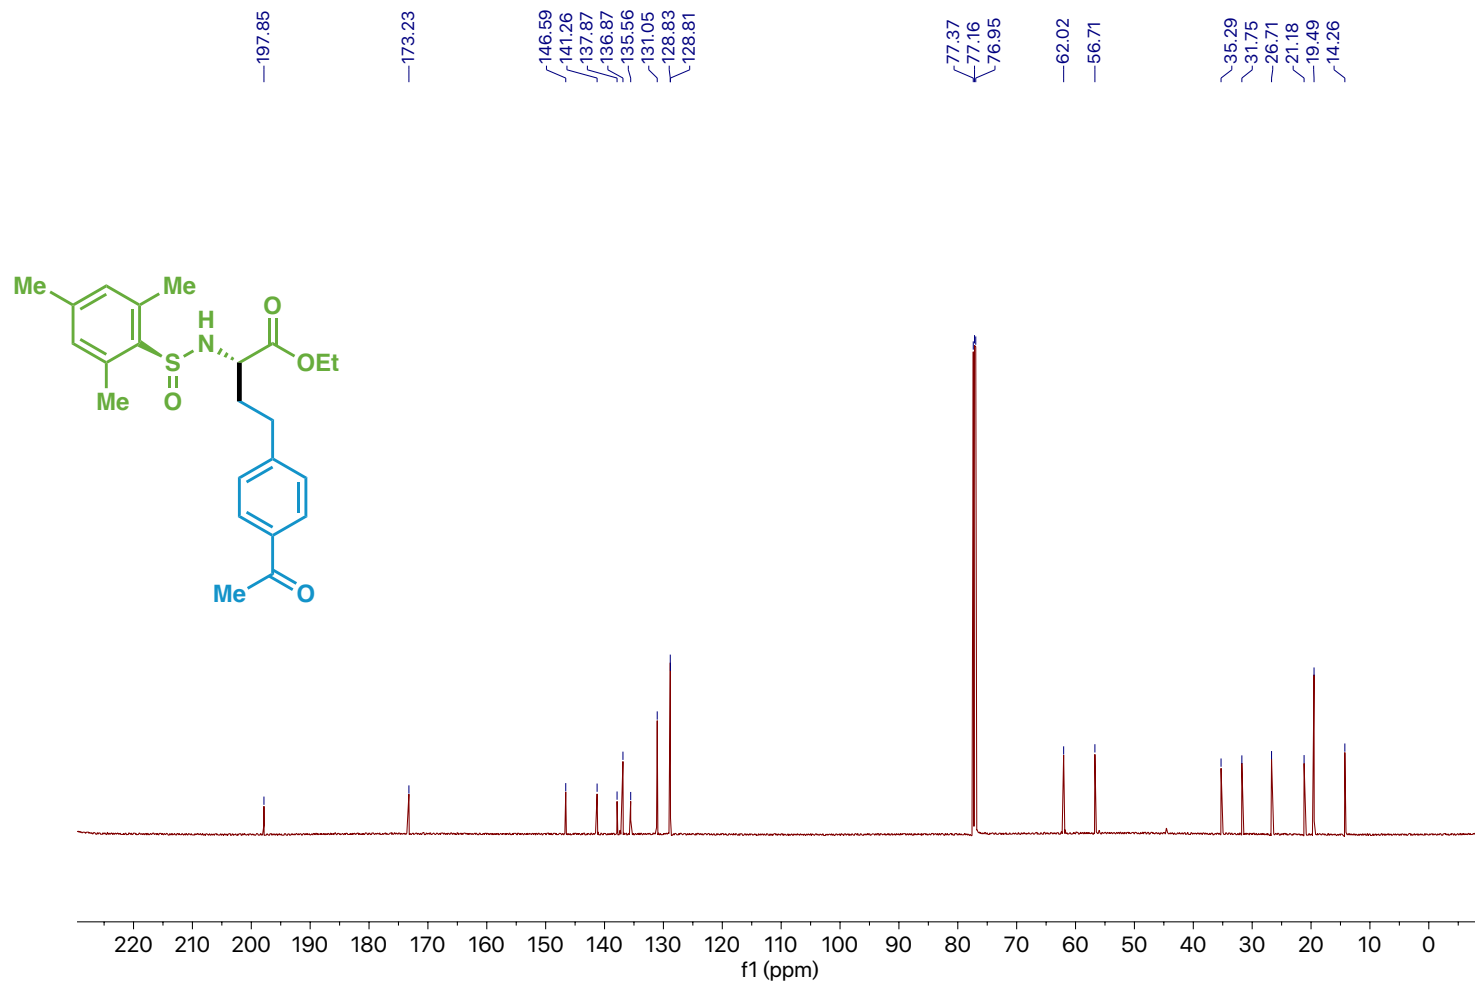

# Compound 42 <sup>1</sup>H NMR

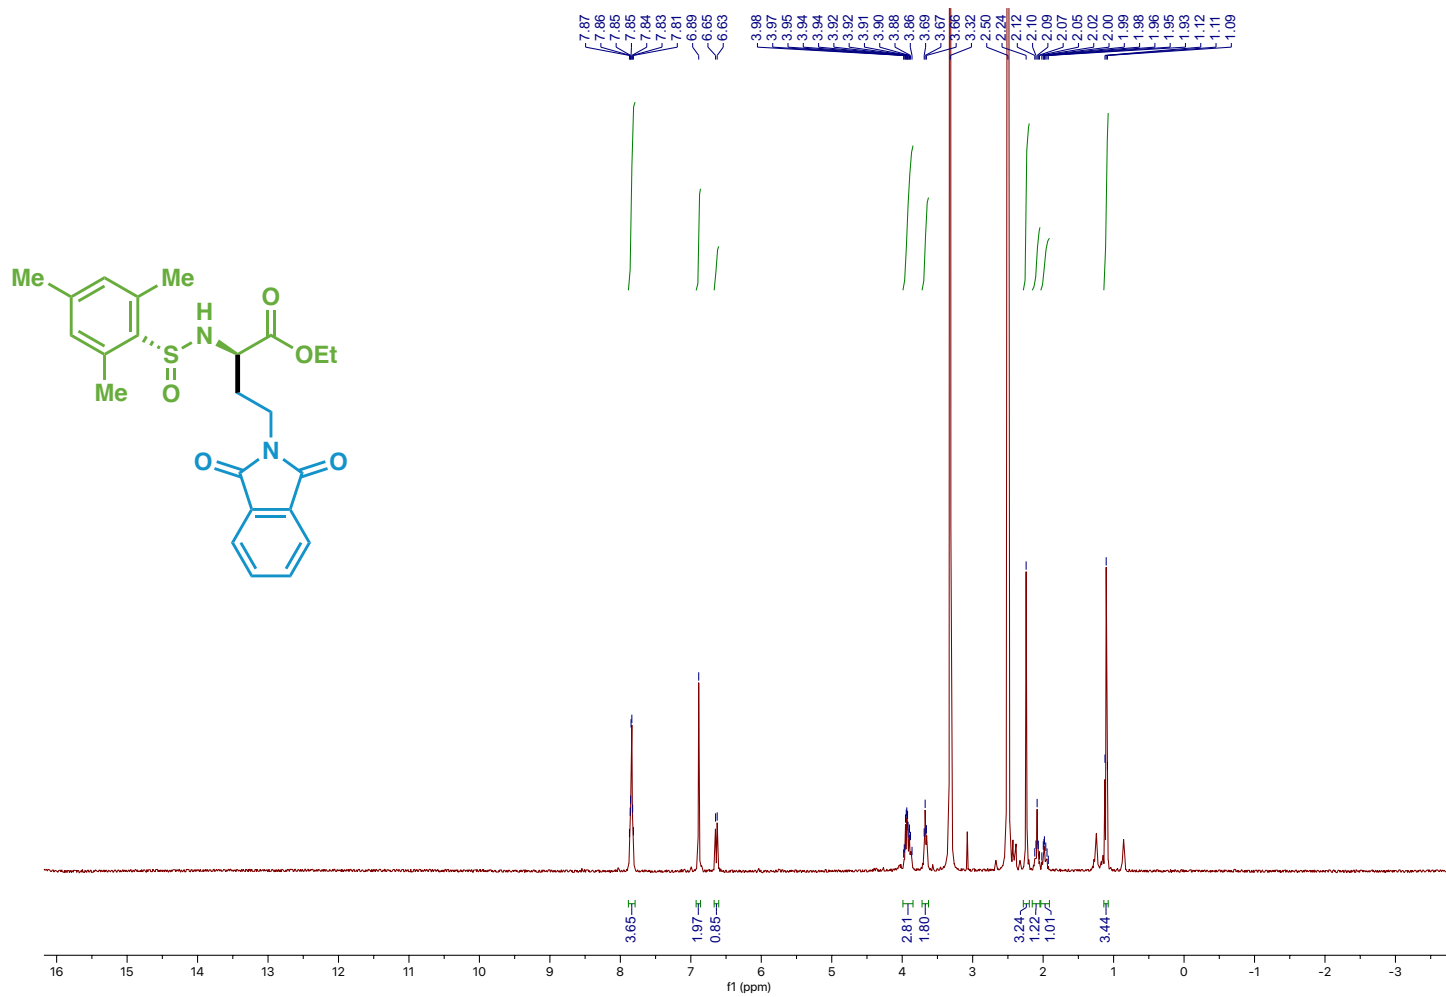

# Compound 42 <sup>13</sup>C NMR

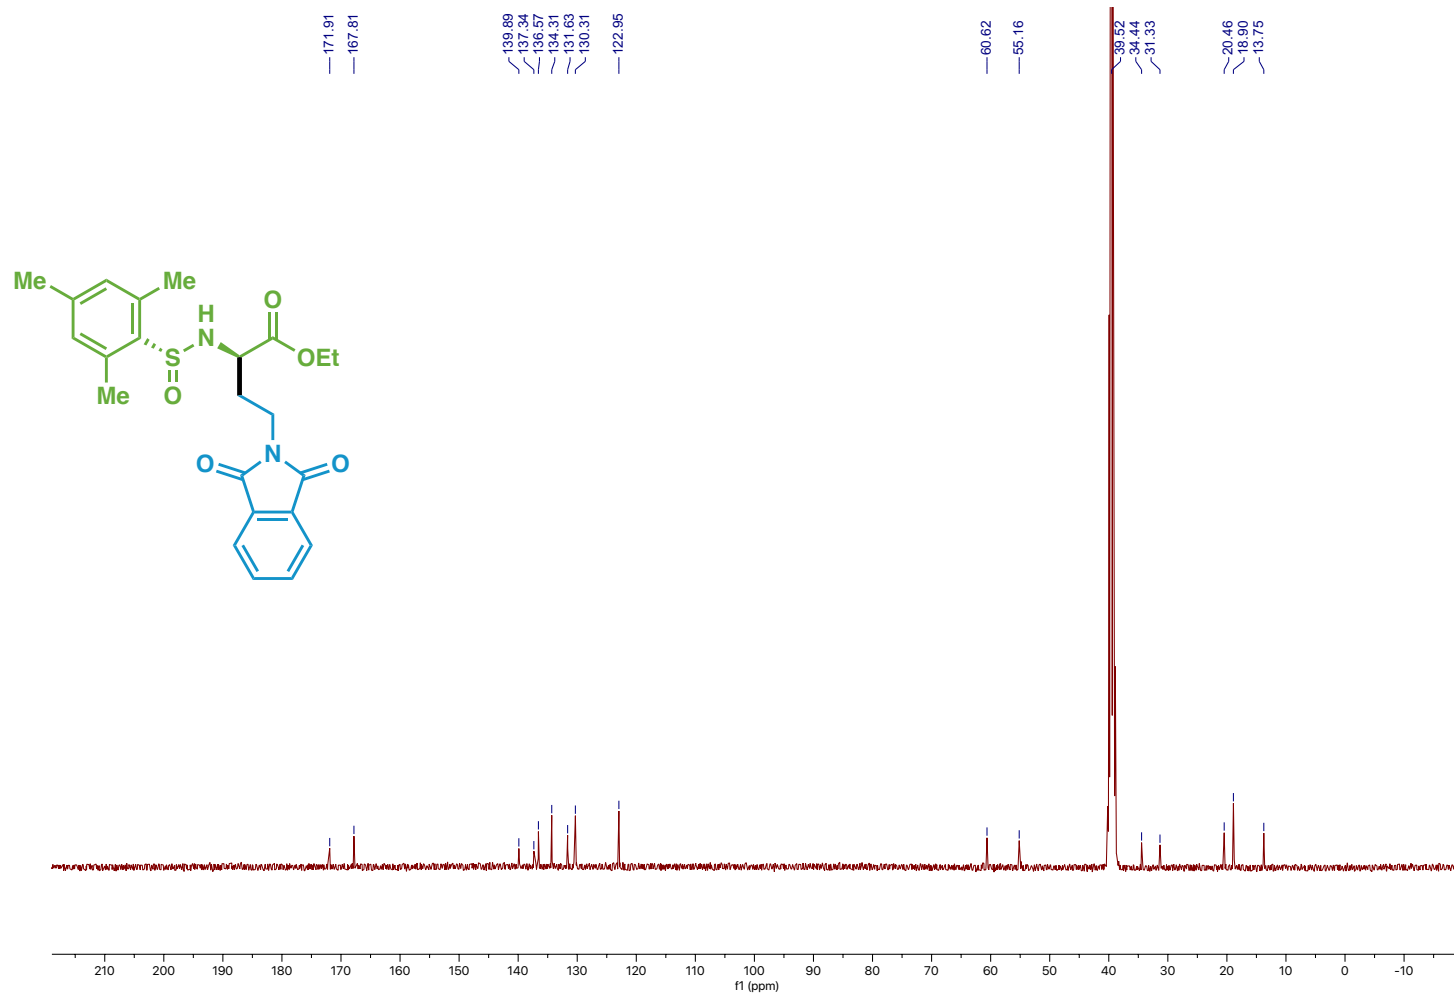

# Compound 43 <sup>1</sup>H NMR

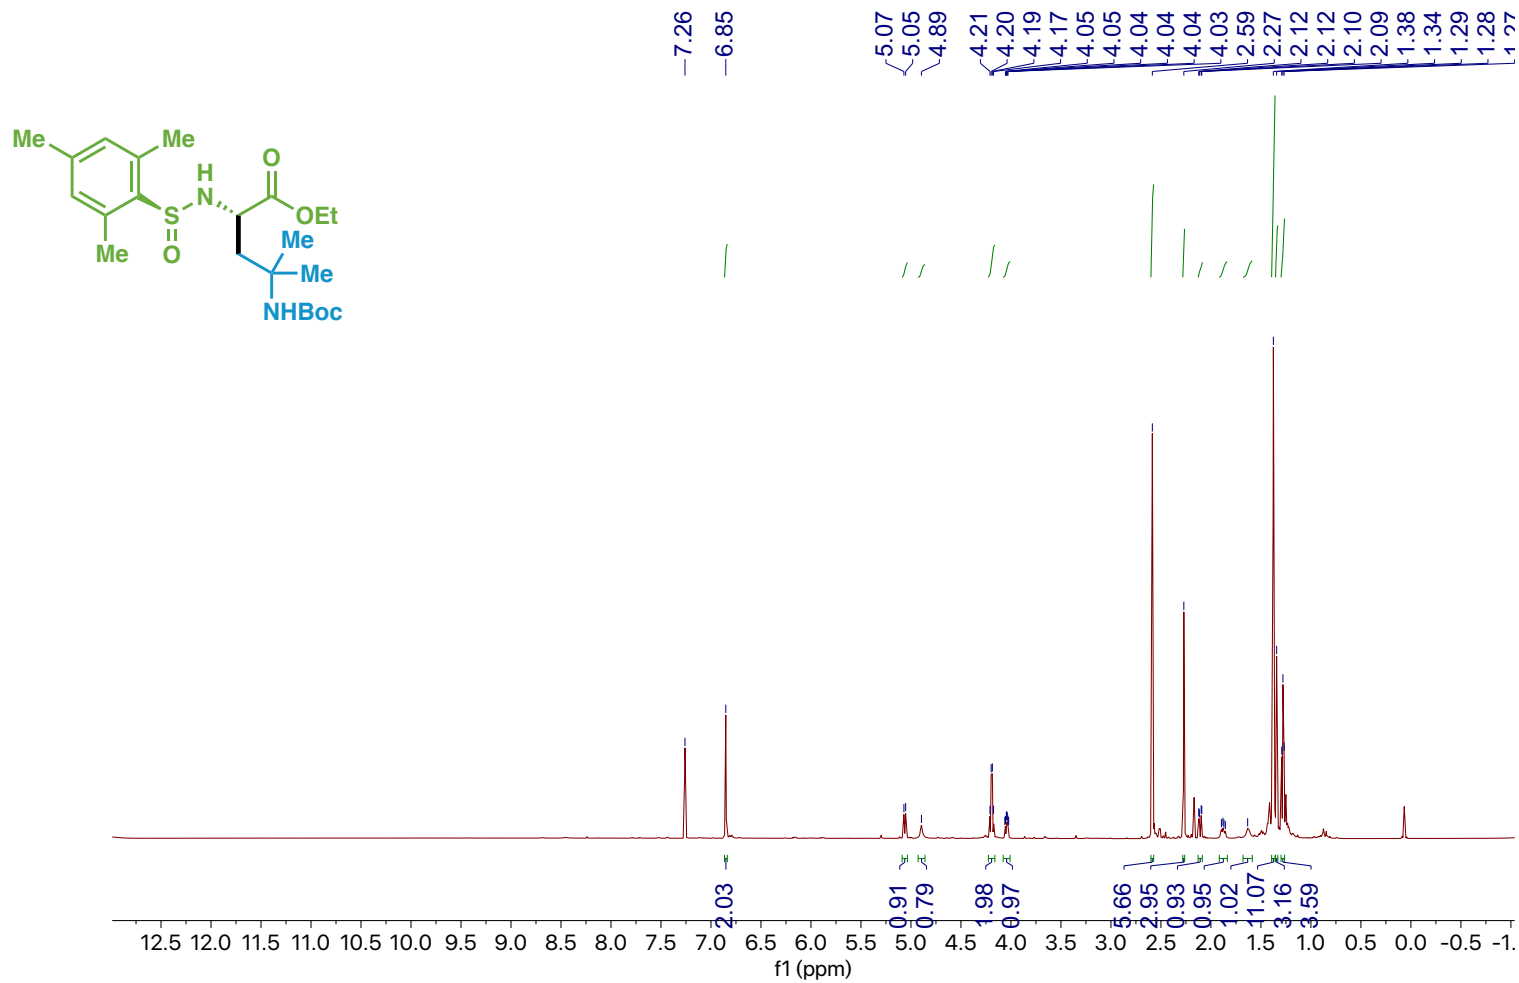



# Compound 43 <sup>13</sup>C NMR

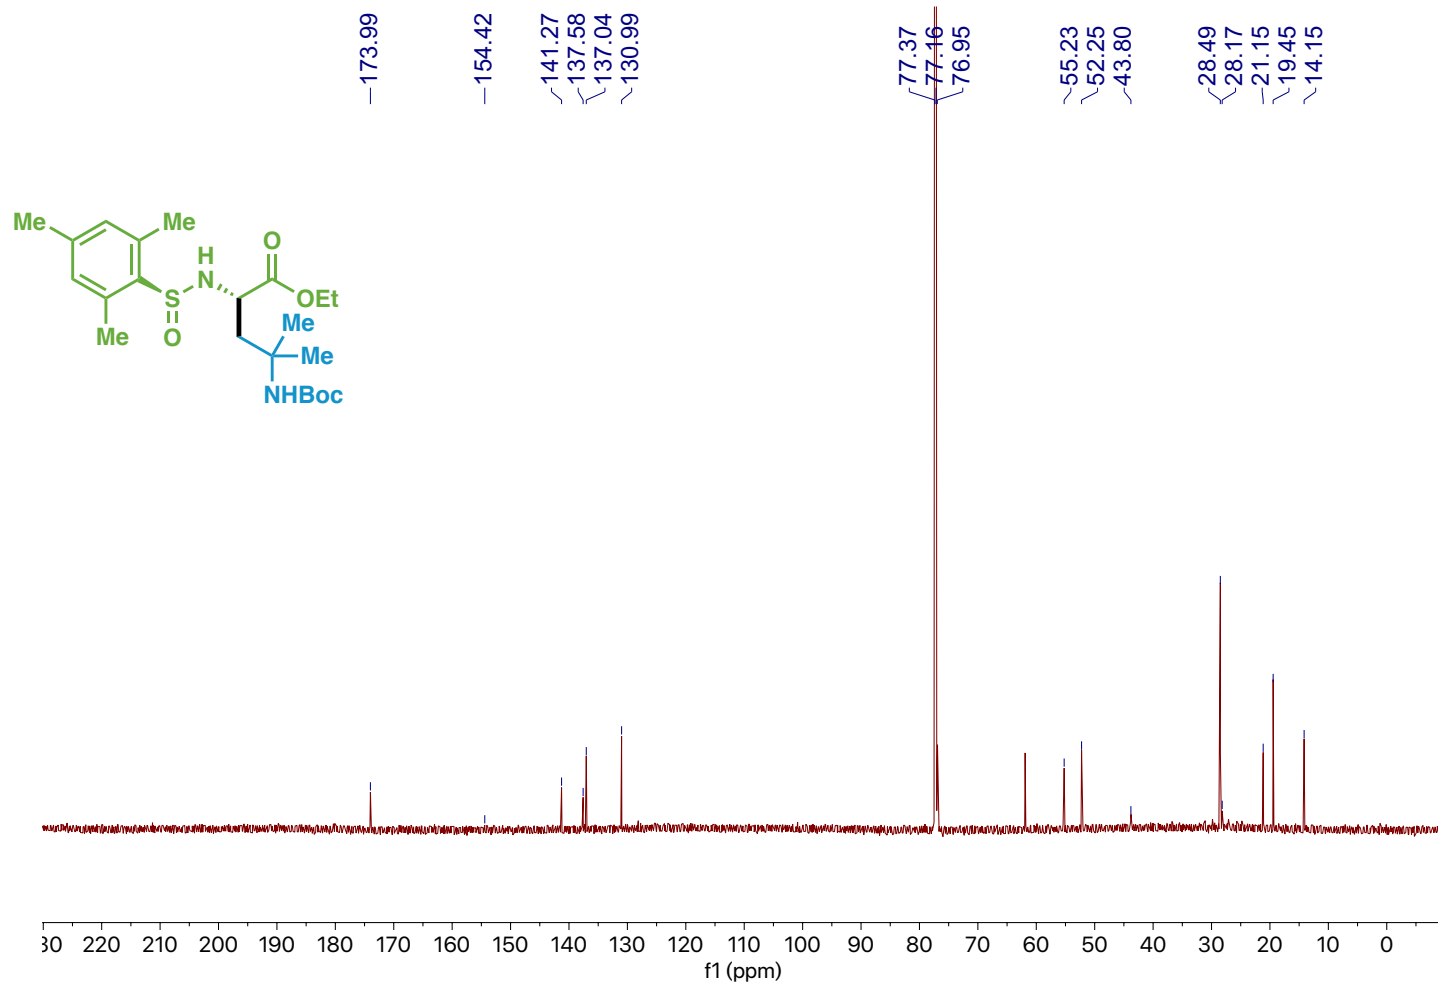

# Compound 44 <sup>1</sup>H NMR

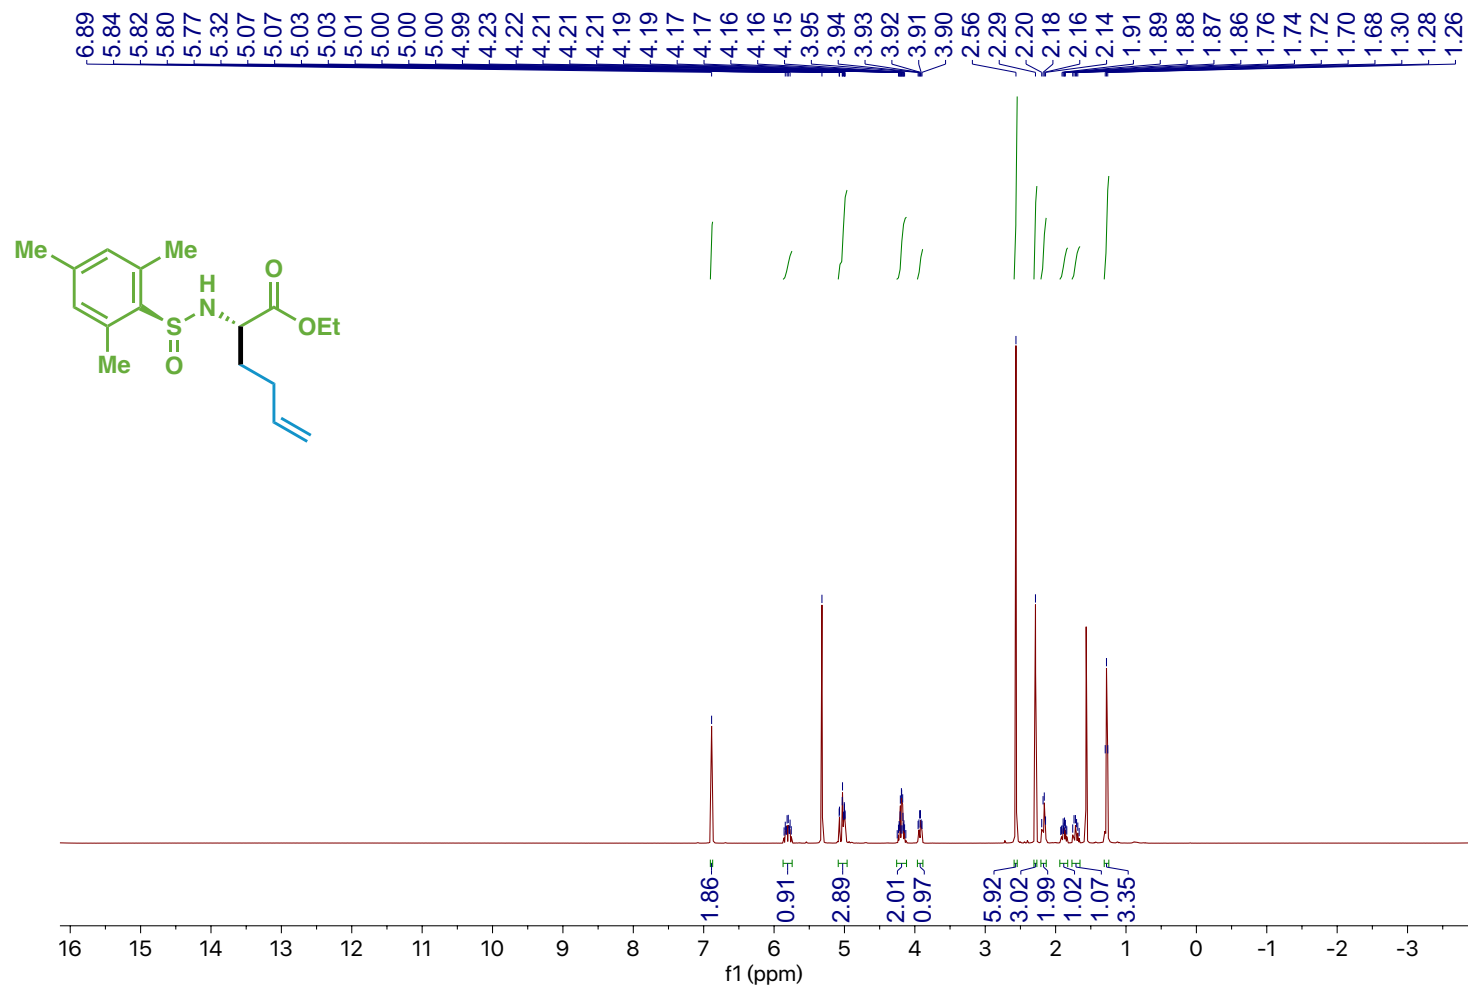

# Compound 44 <sup>13</sup>C NMR

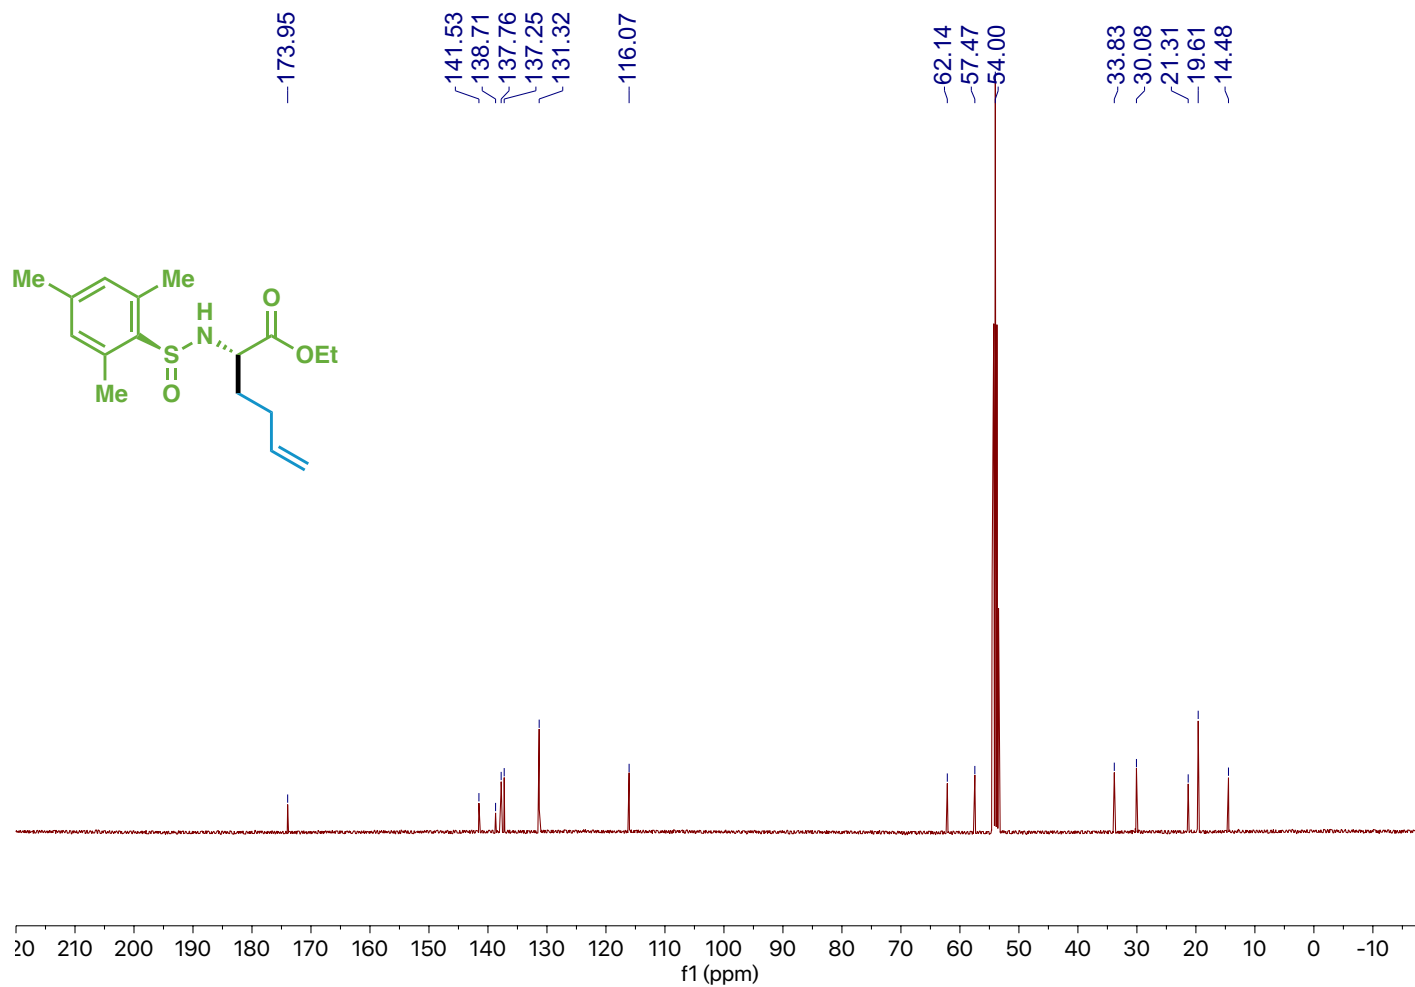

# Compound 45 <sup>1</sup>H NMR

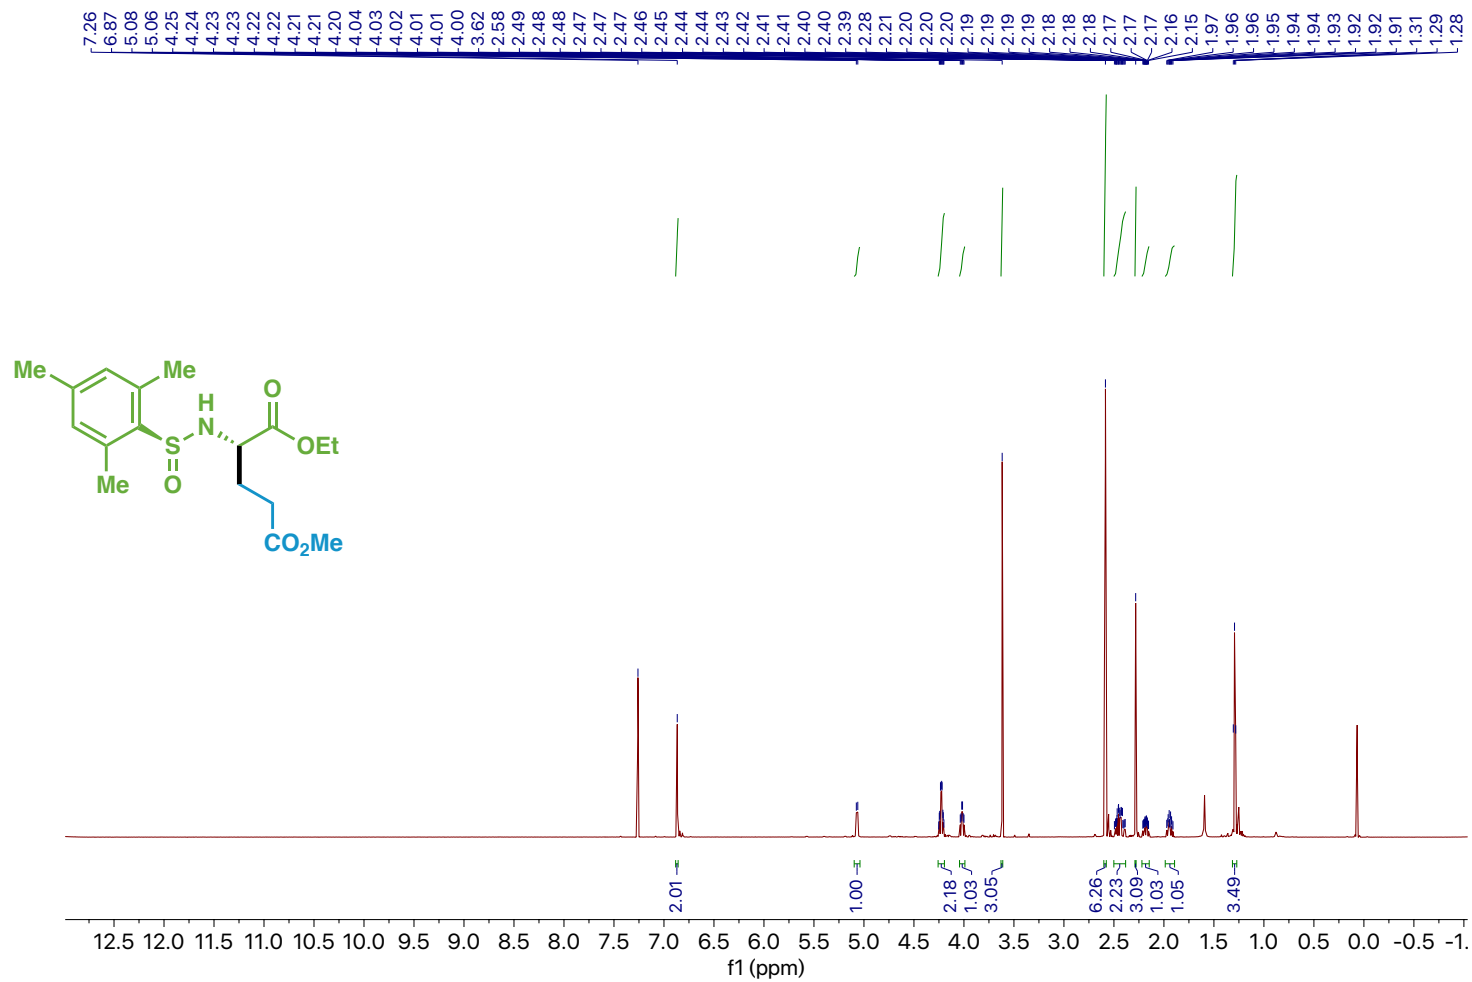

# Compound 45 <sup>13</sup>C NMR

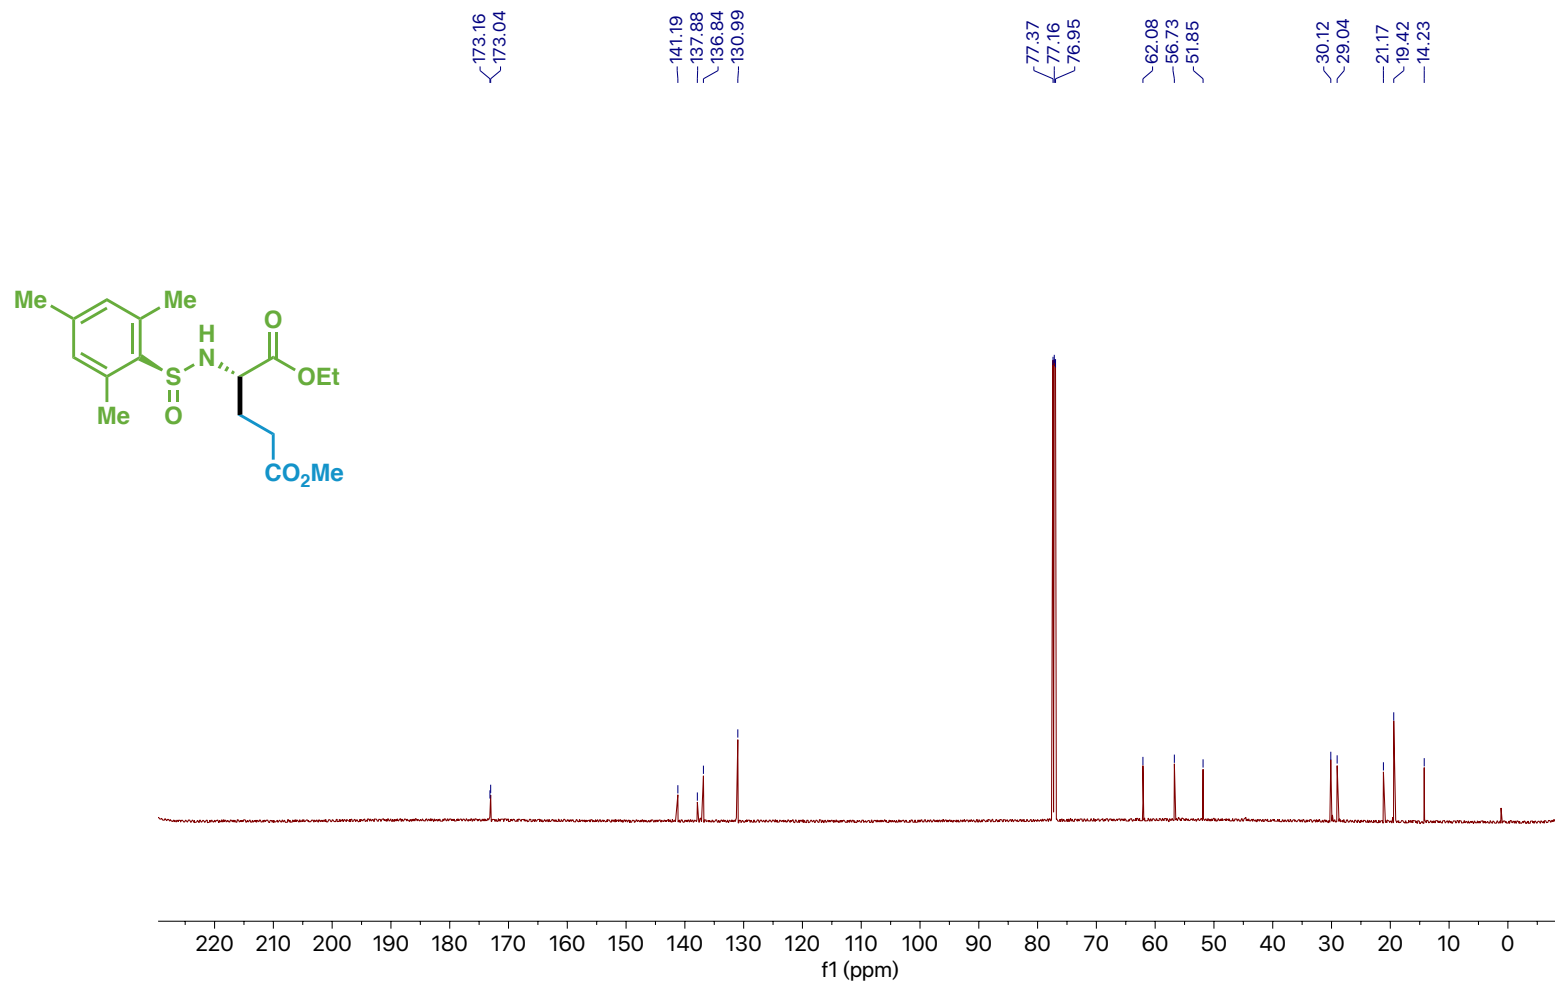

# Compound 46 <sup>1</sup>H NMR

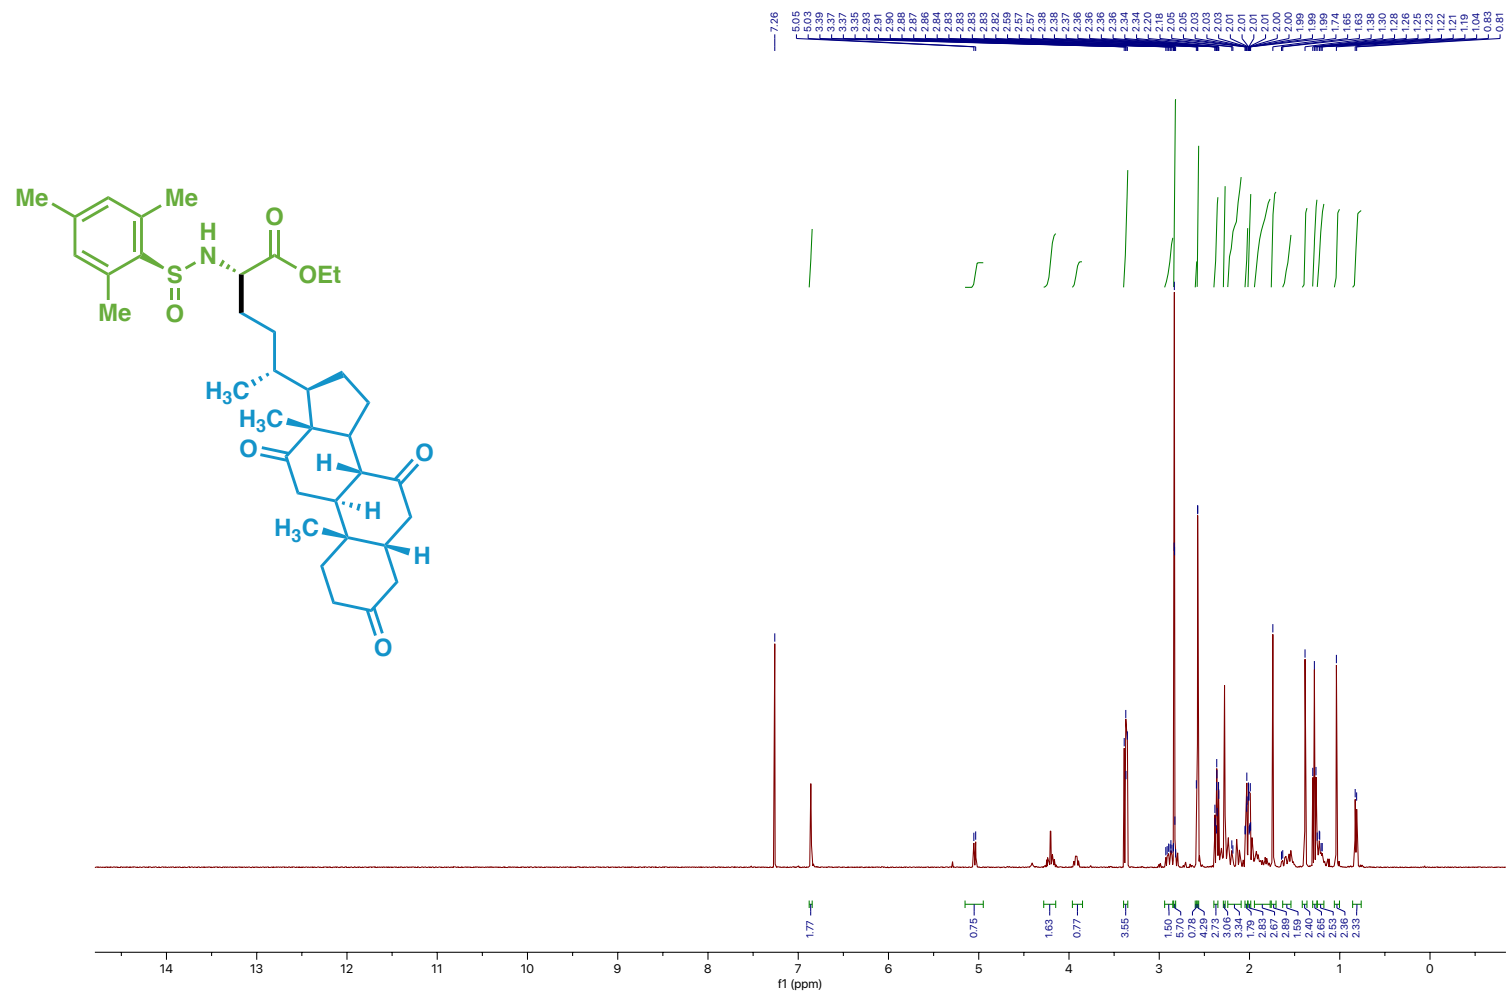

# Compound 46 <sup>13</sup>C NMR

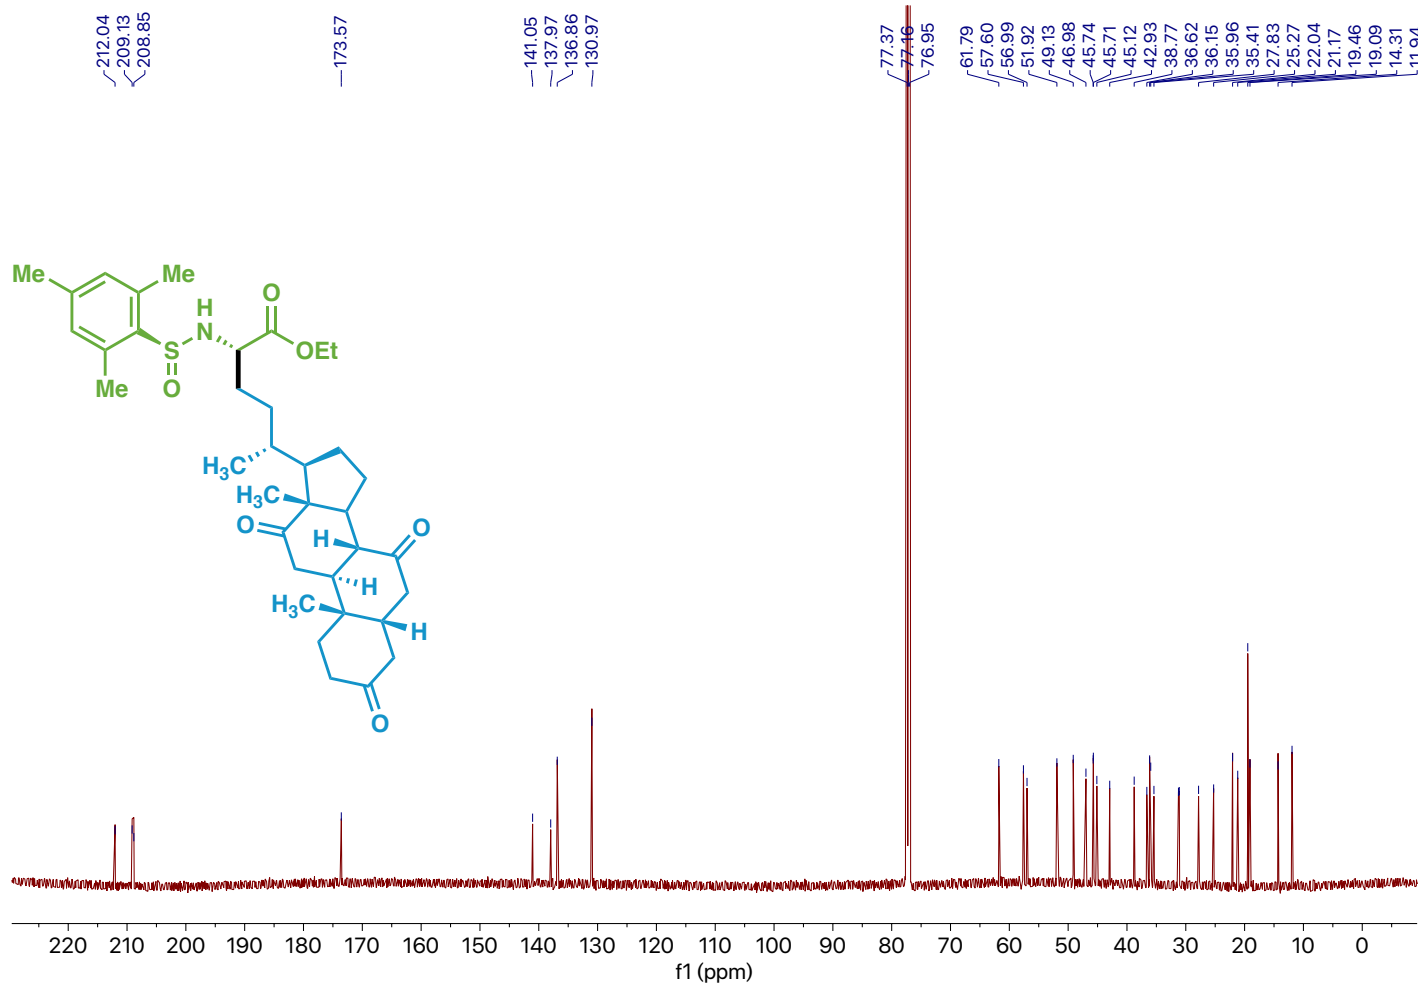

# Compound 47 <sup>1</sup>H NMR

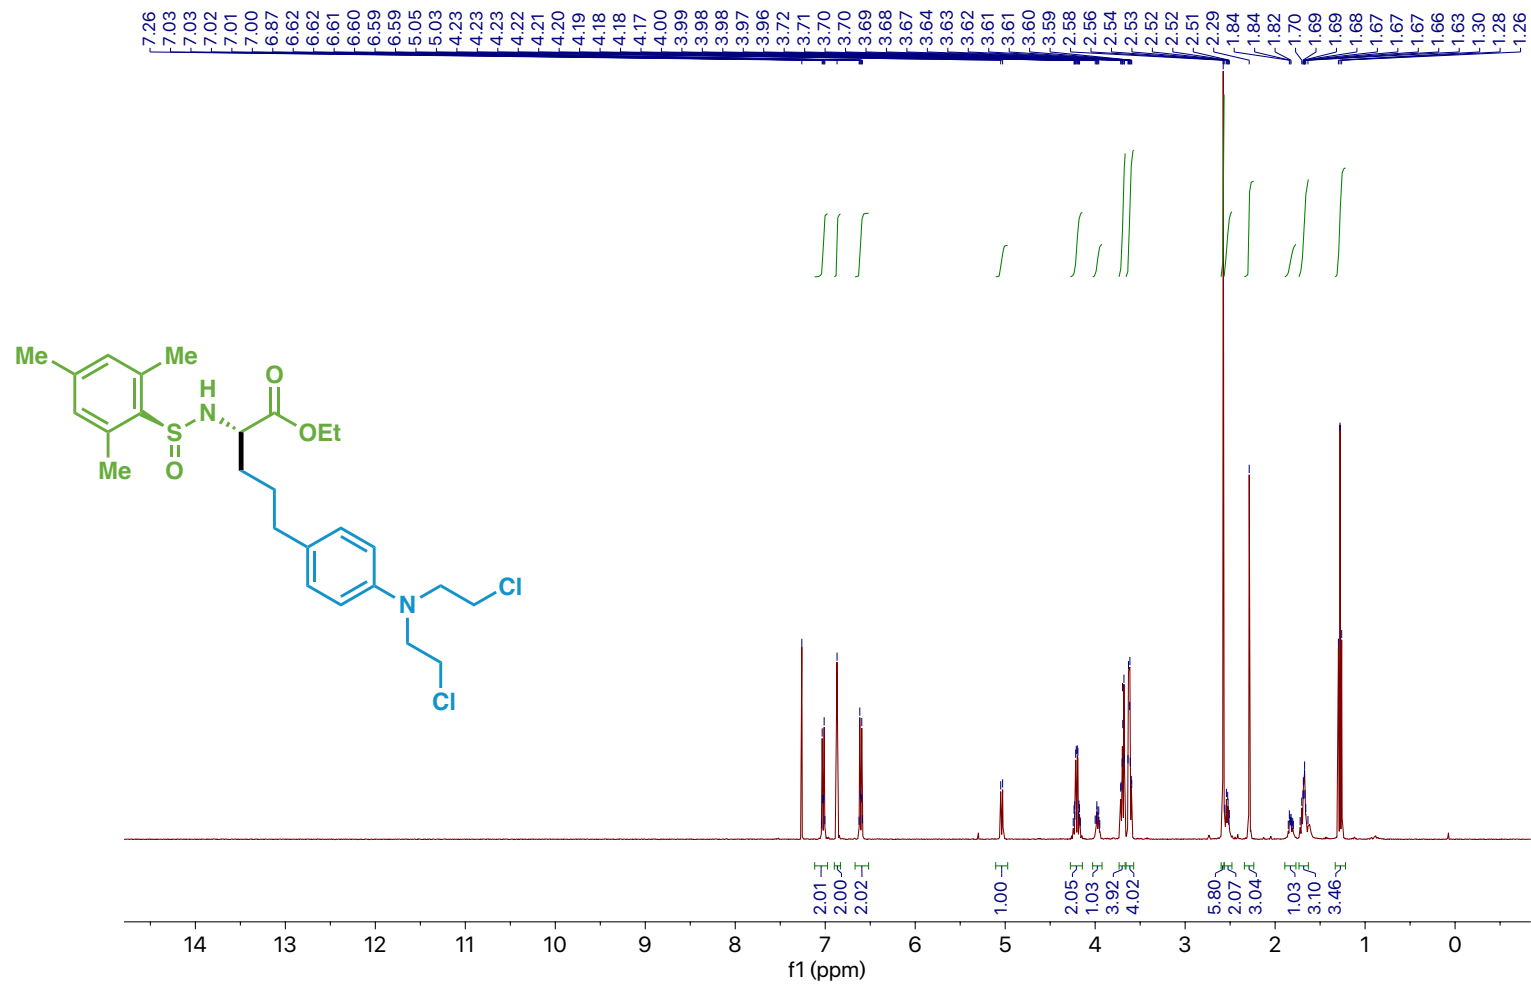



# Compound 47 <sup>13</sup>C NMR

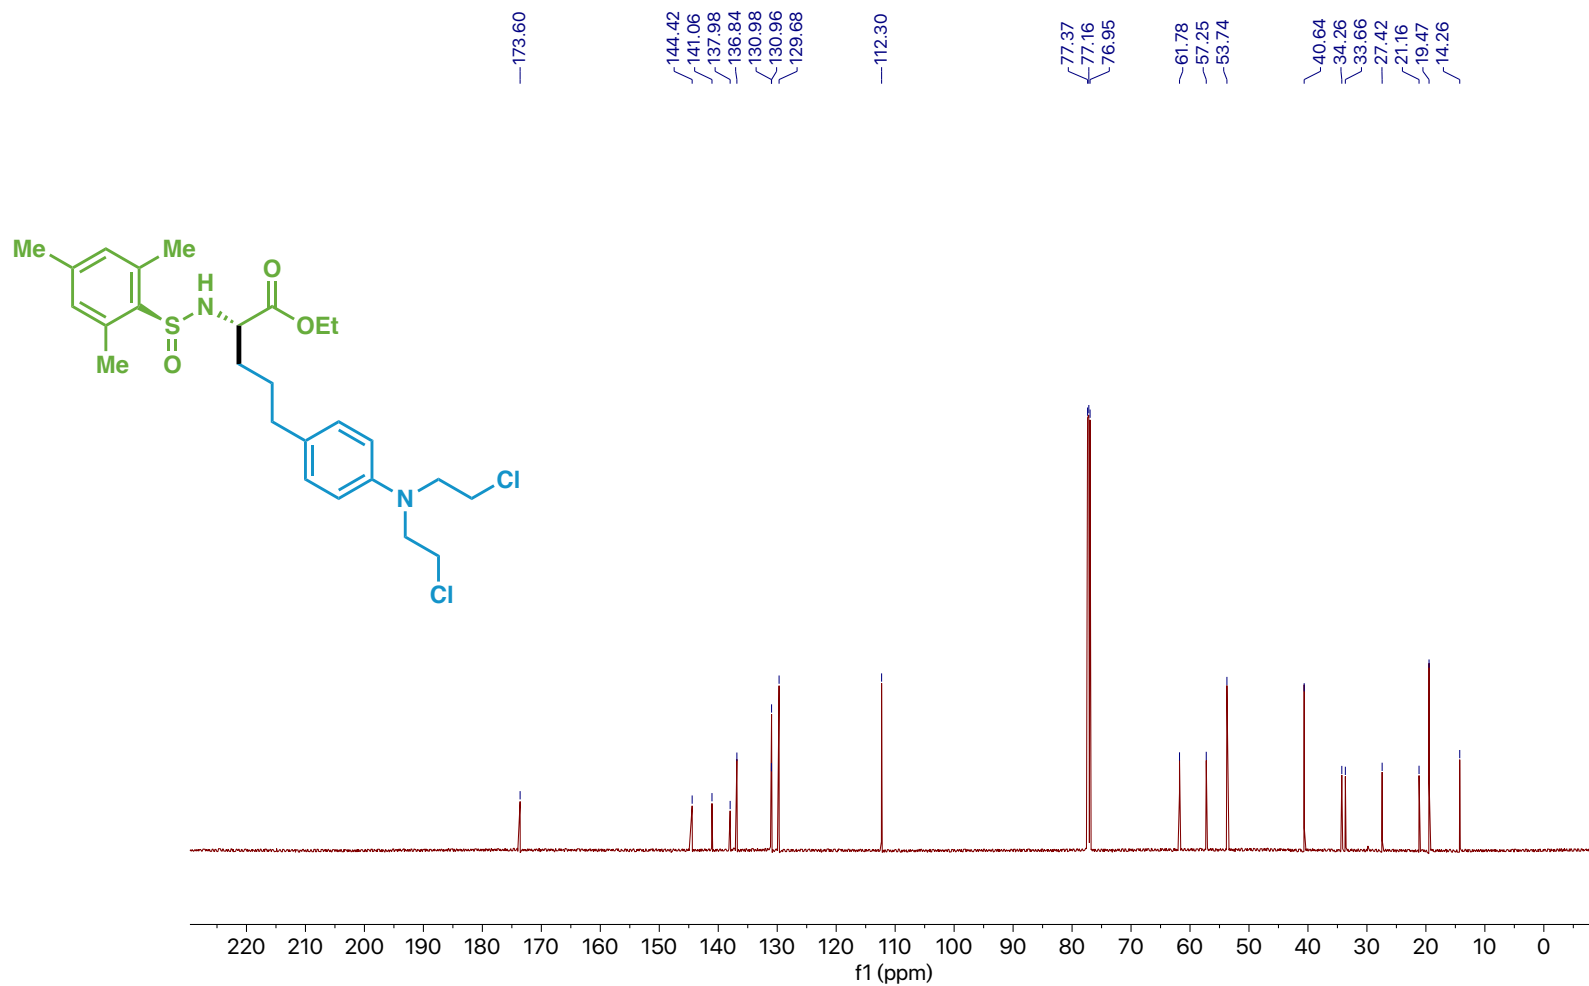

# Compound 48 <sup>1</sup>H NMR

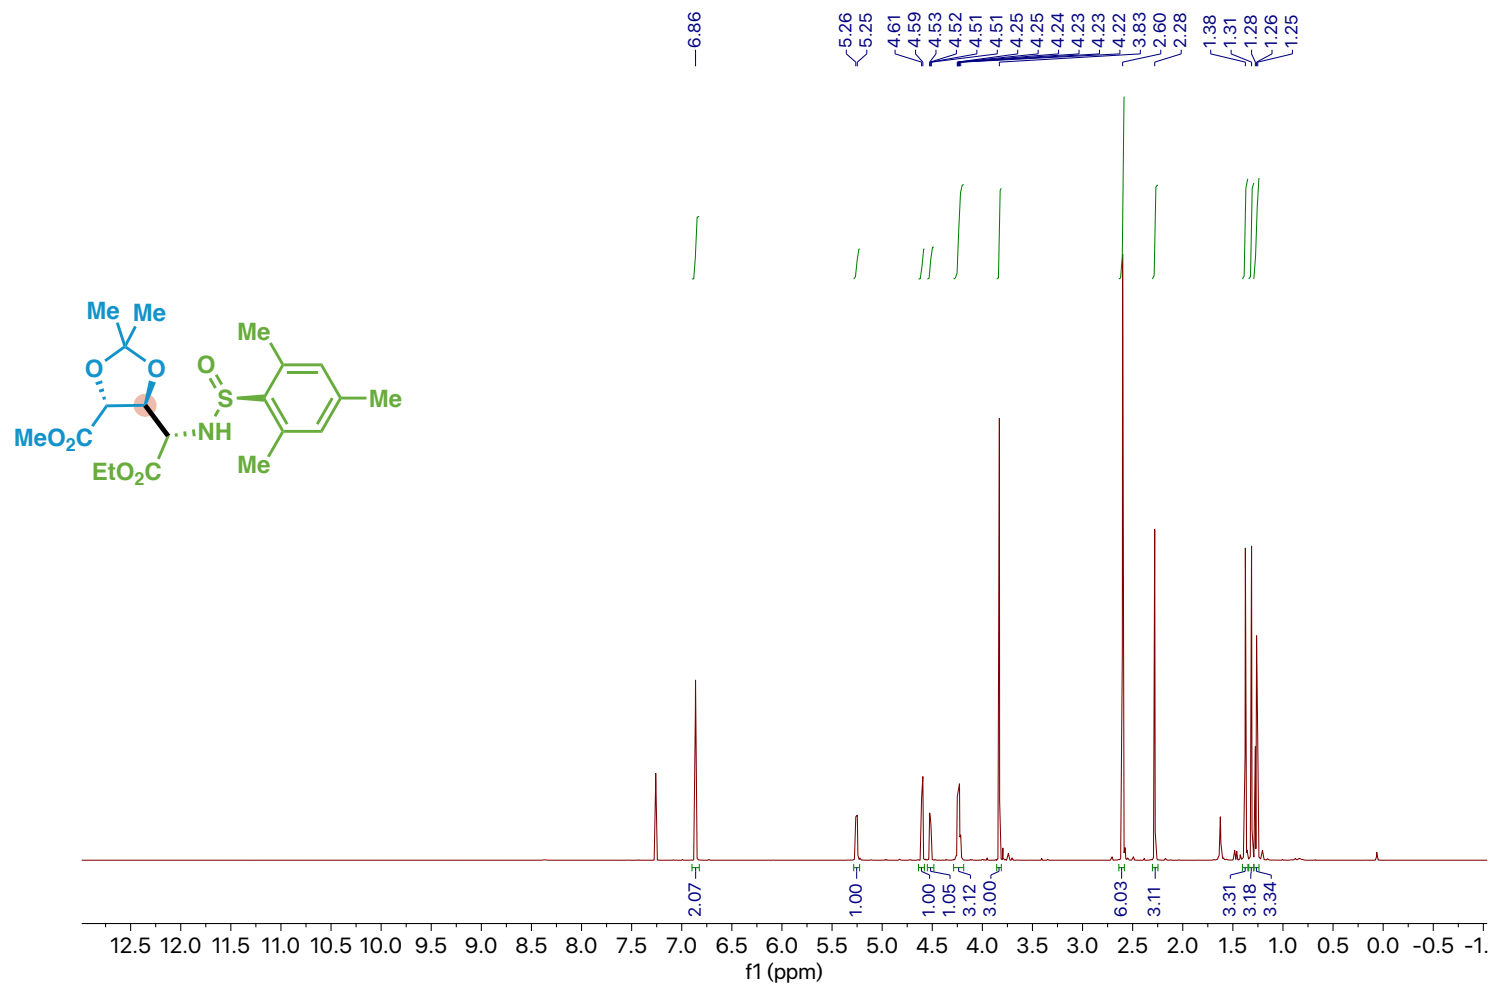

# Compound 48 <sup>13</sup>C NMR

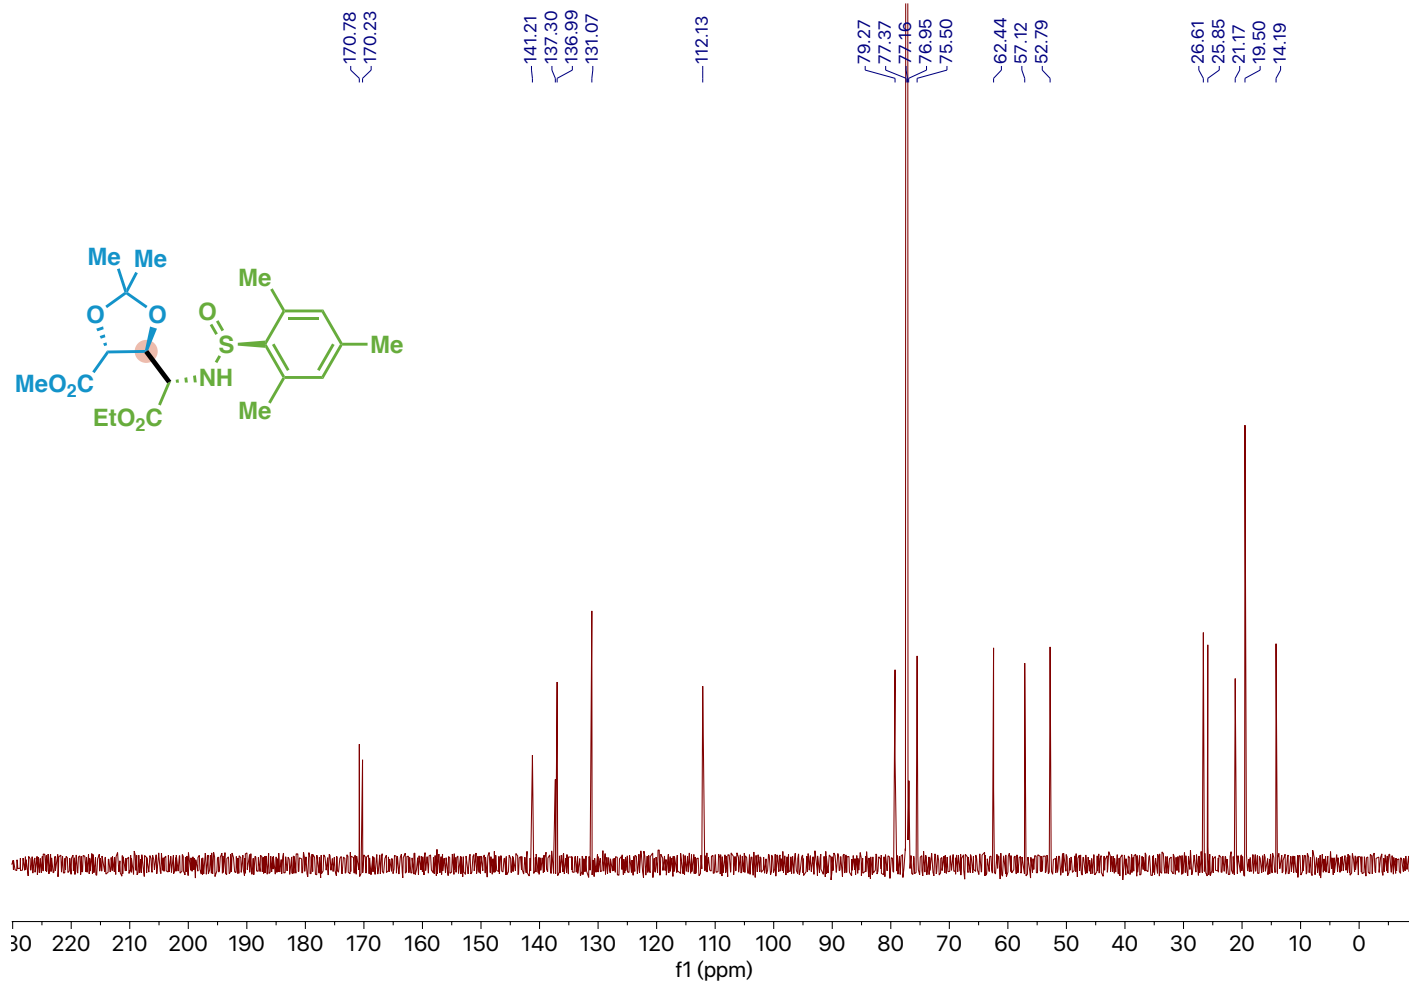

# Compound 49 <sup>1</sup>H NMR

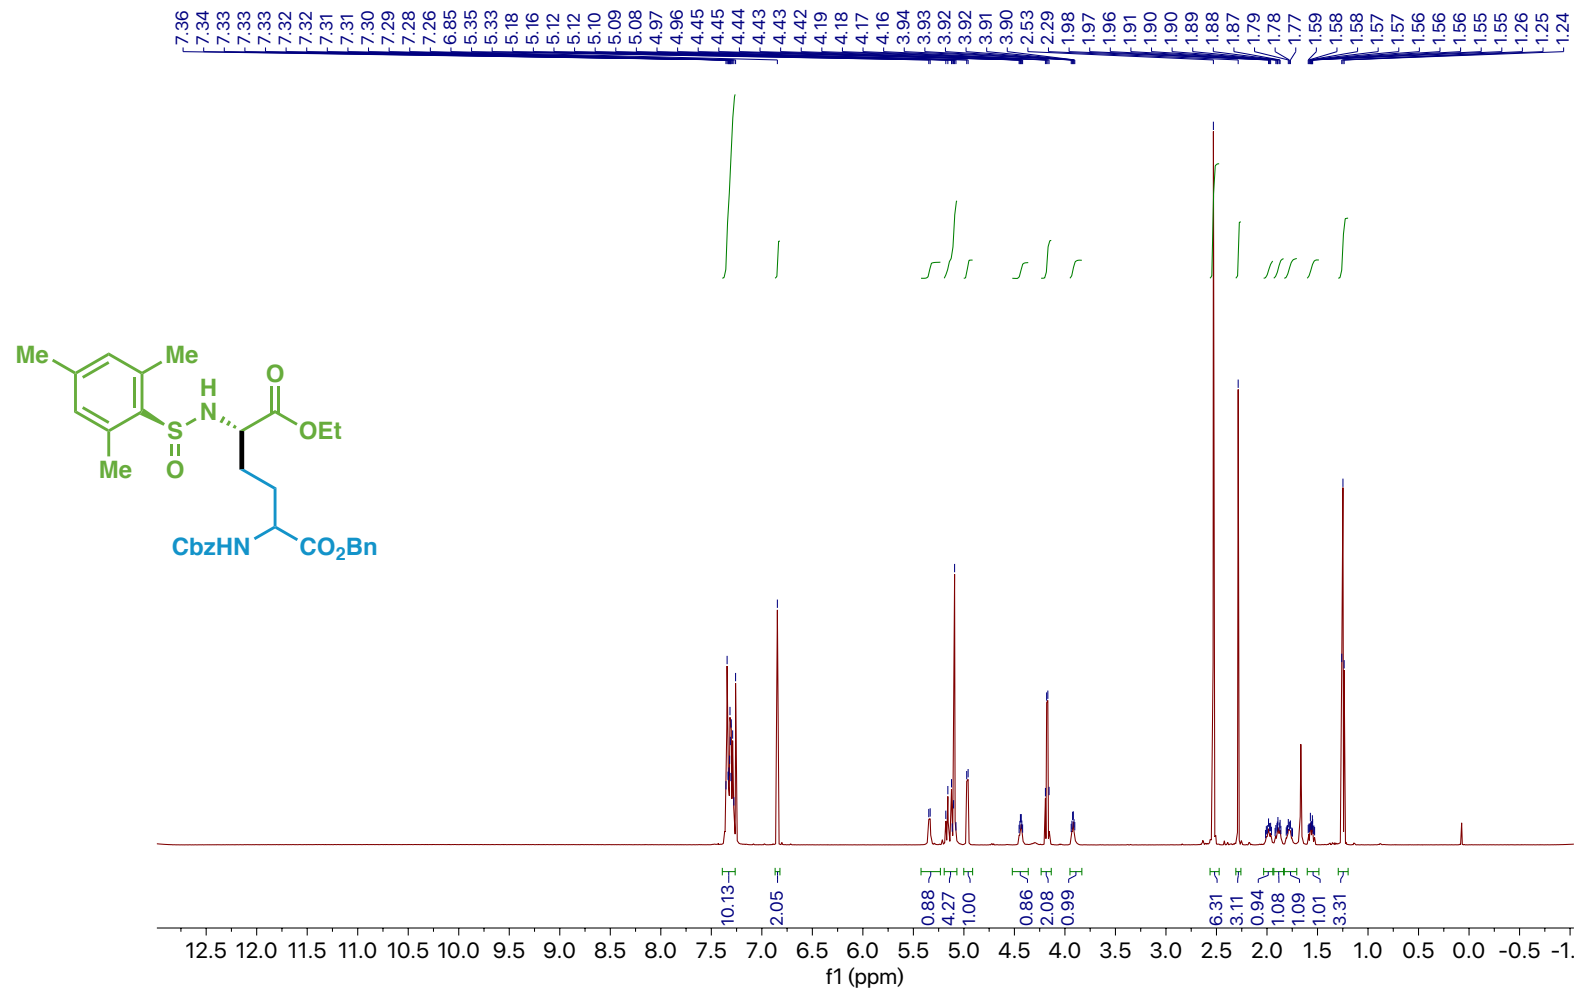

# Compound 49 <sup>13</sup>C NMR

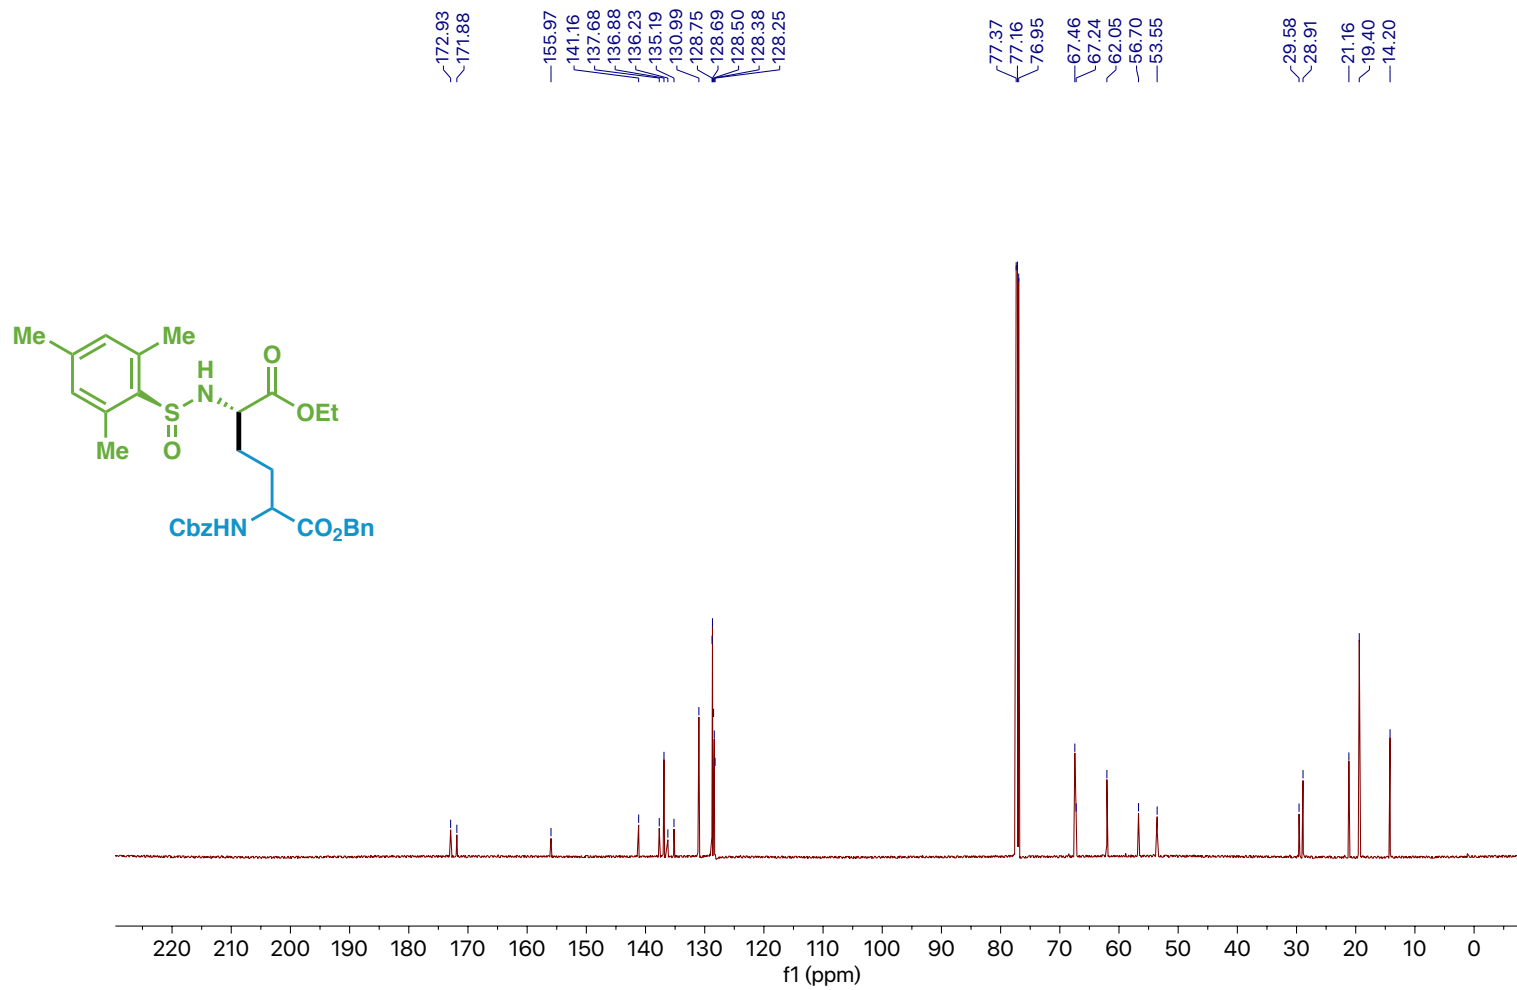

# Compound 50 <sup>1</sup>H NMR

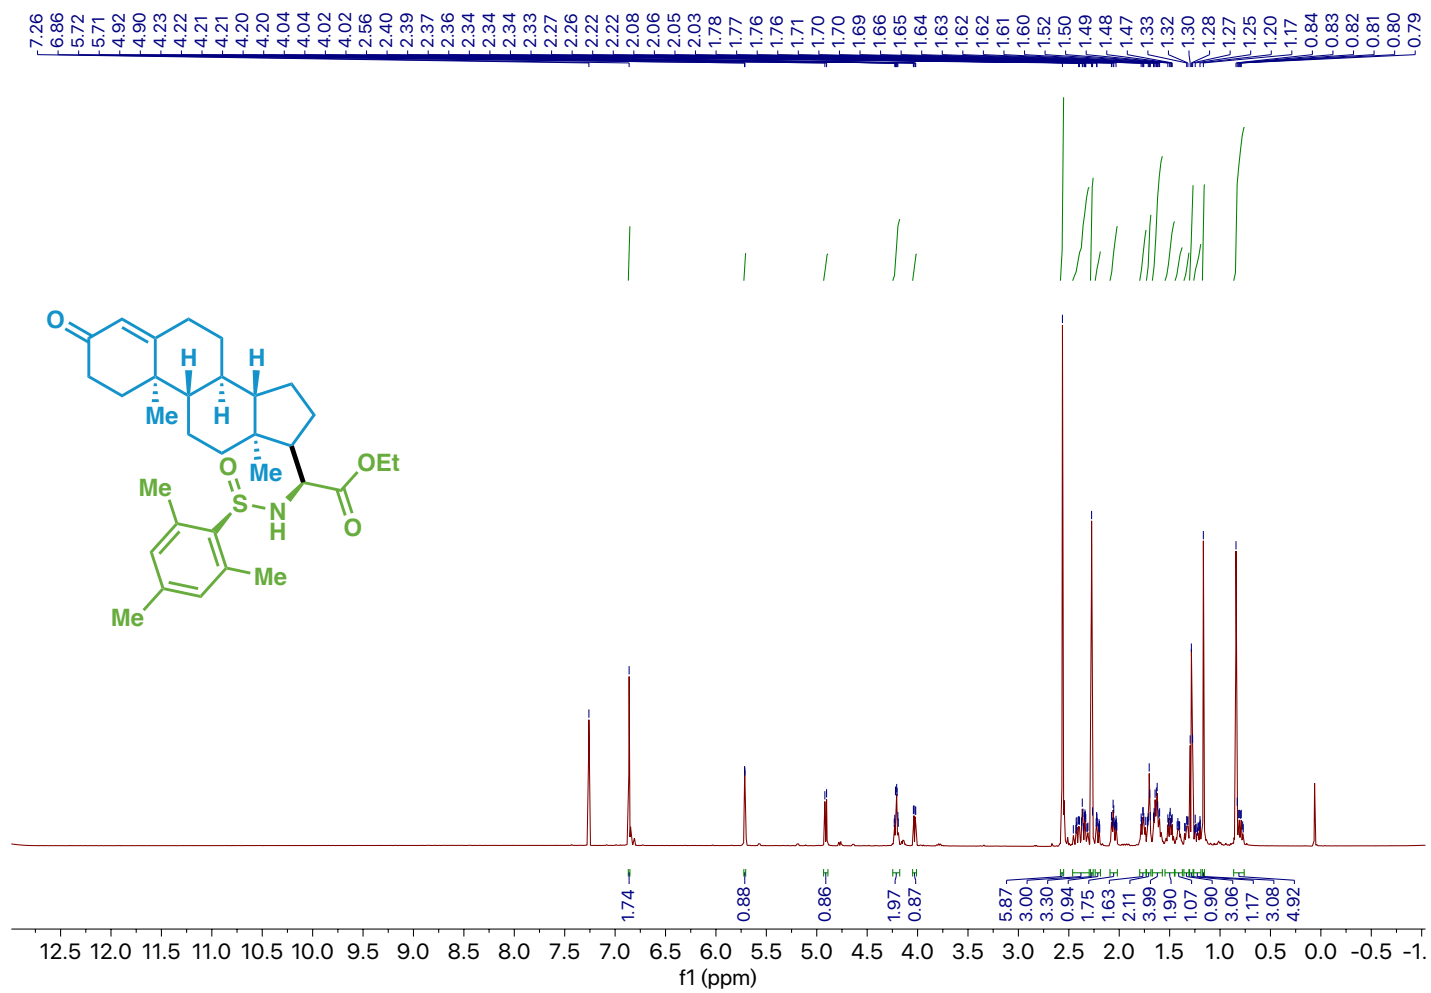

# Compound 51 <sup>13</sup>C NMR

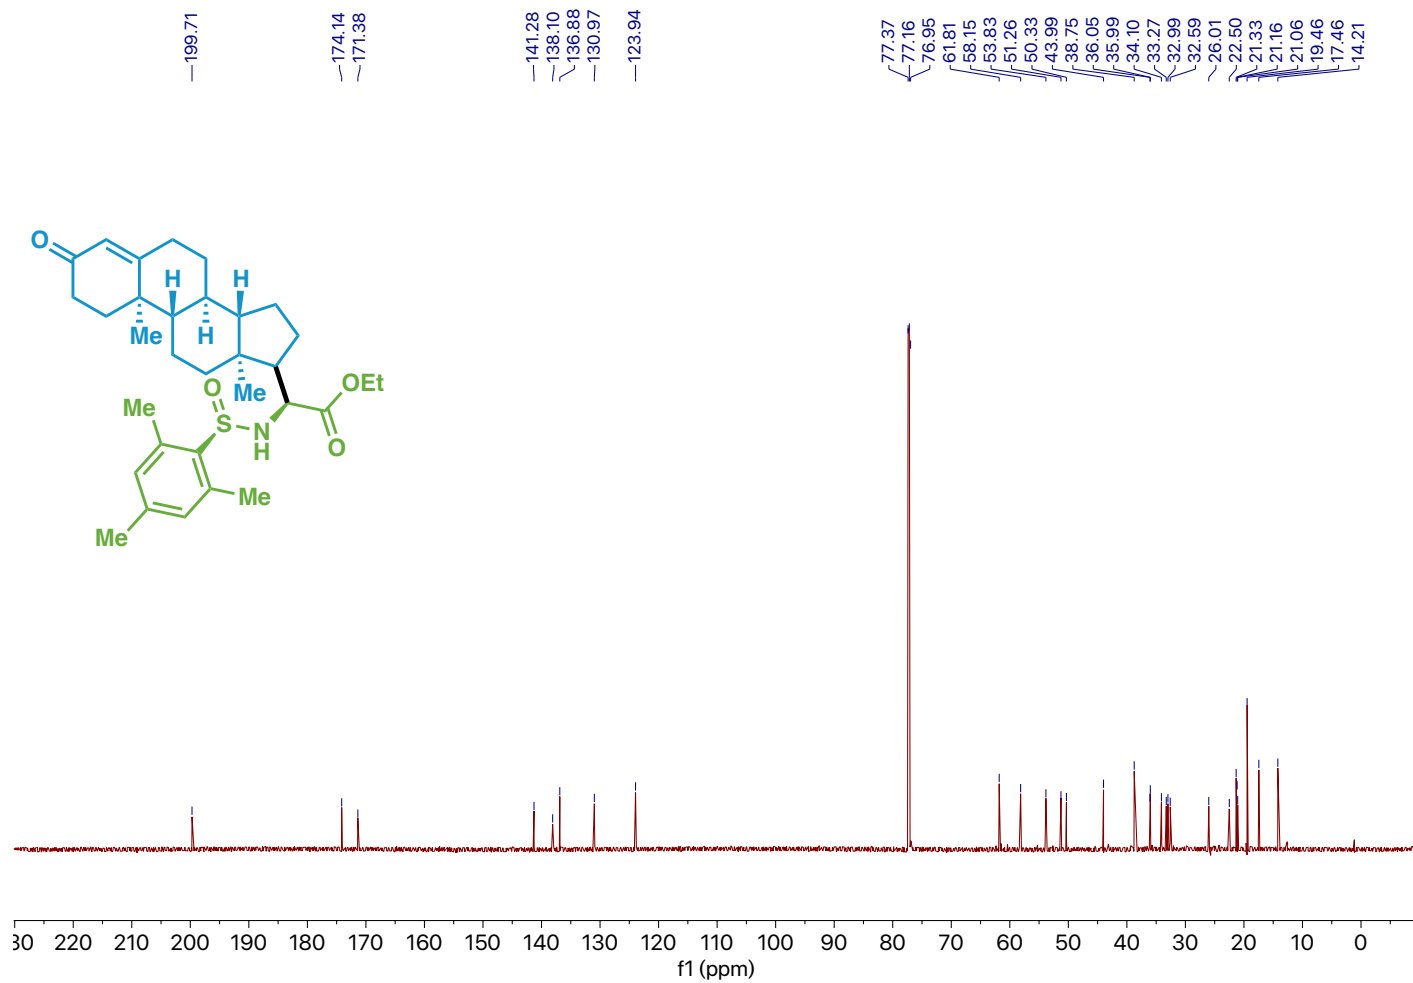





# Compound 51 <sup>13</sup>C NMR

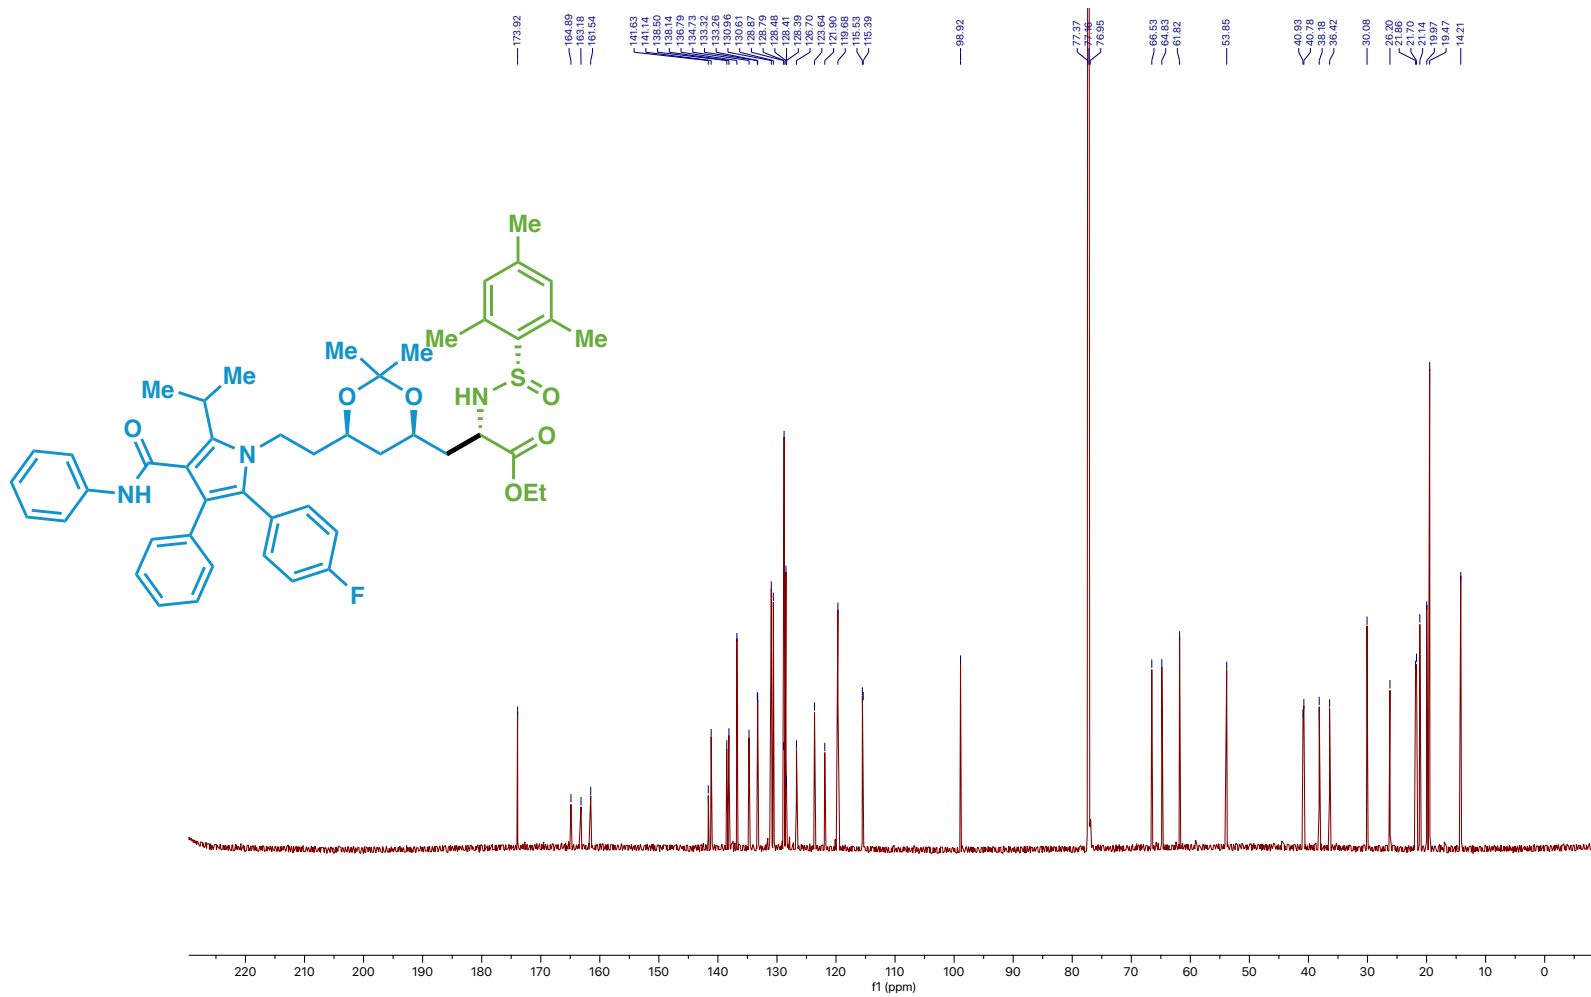

# Compound 51 <sup>19</sup>F NMR

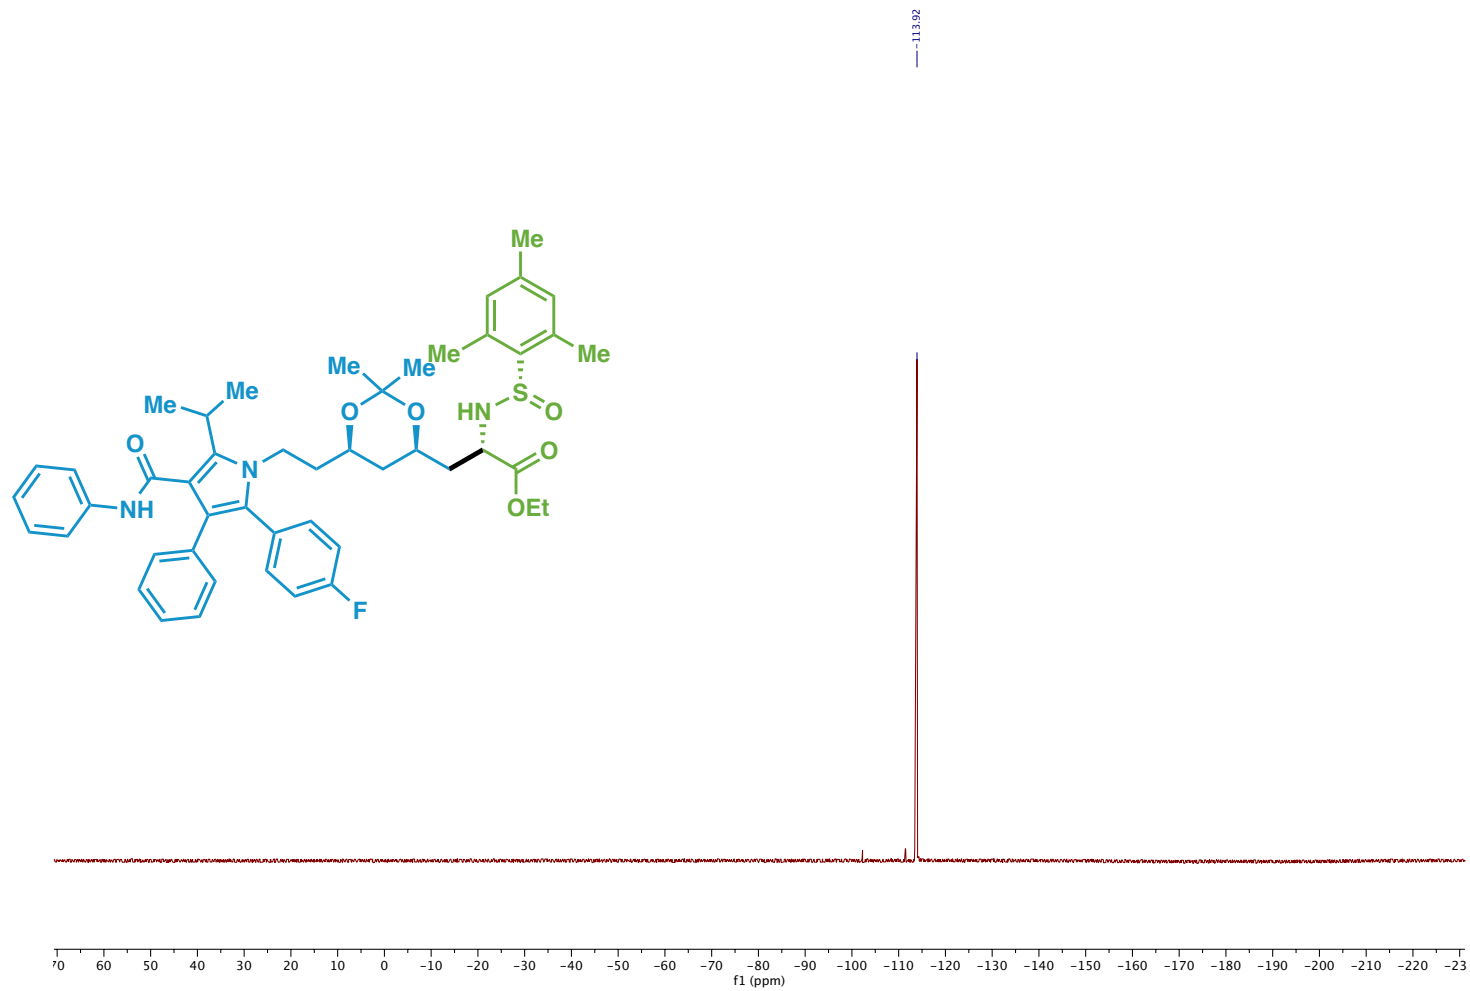



# Compound 52 <sup>13</sup>C NMR

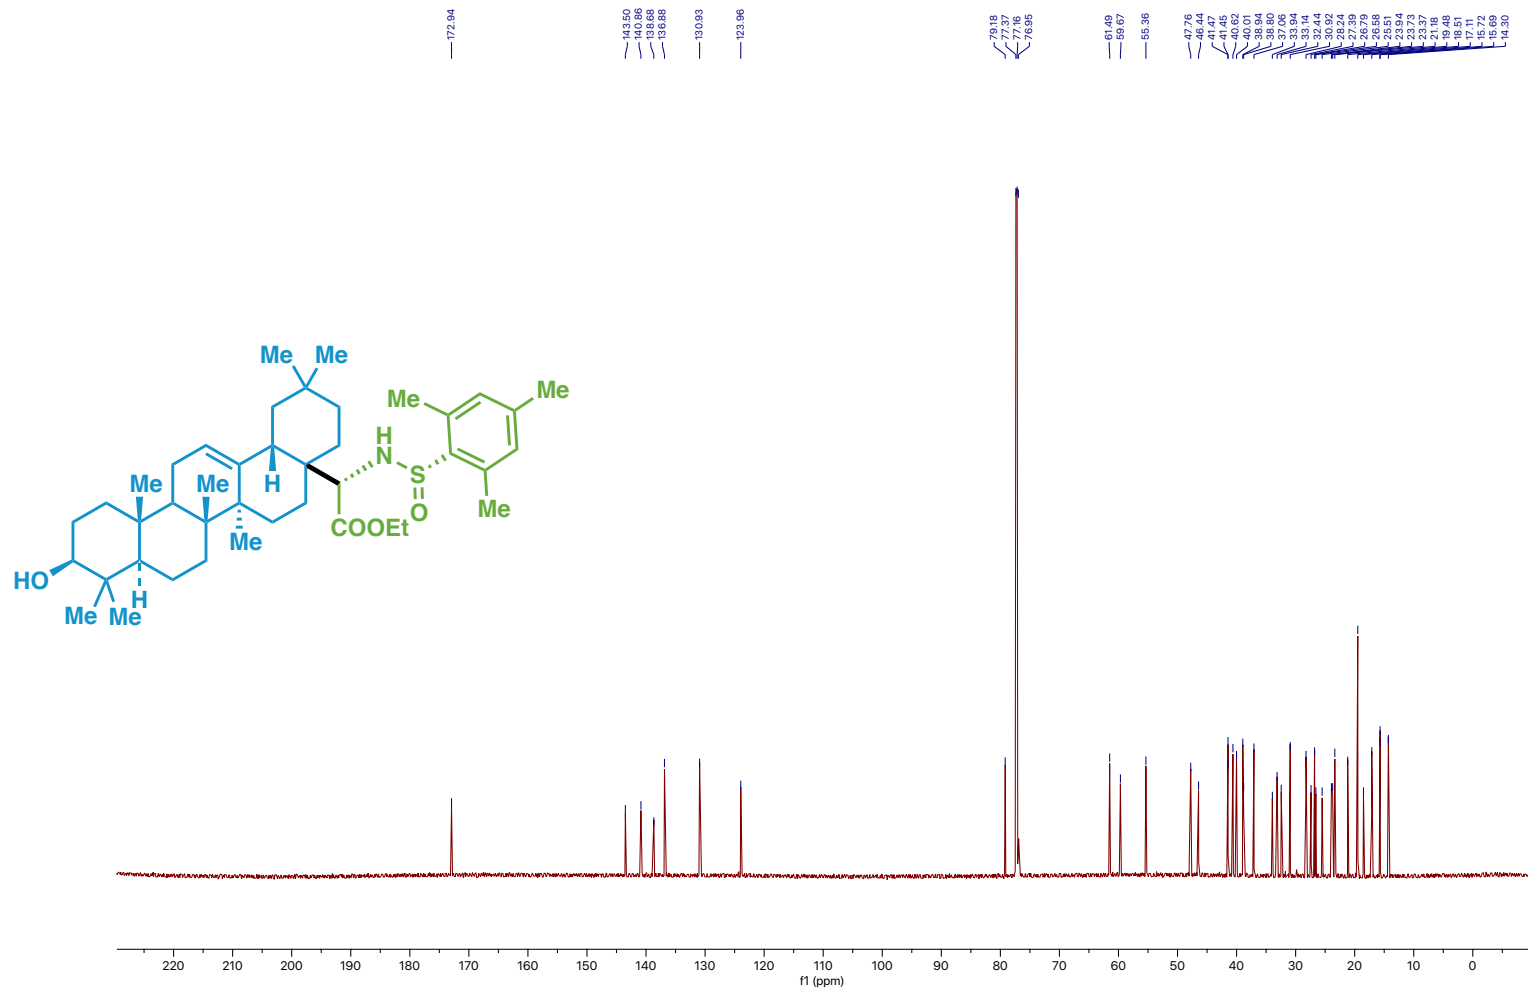

# Compound 53 <sup>1</sup>H NMR

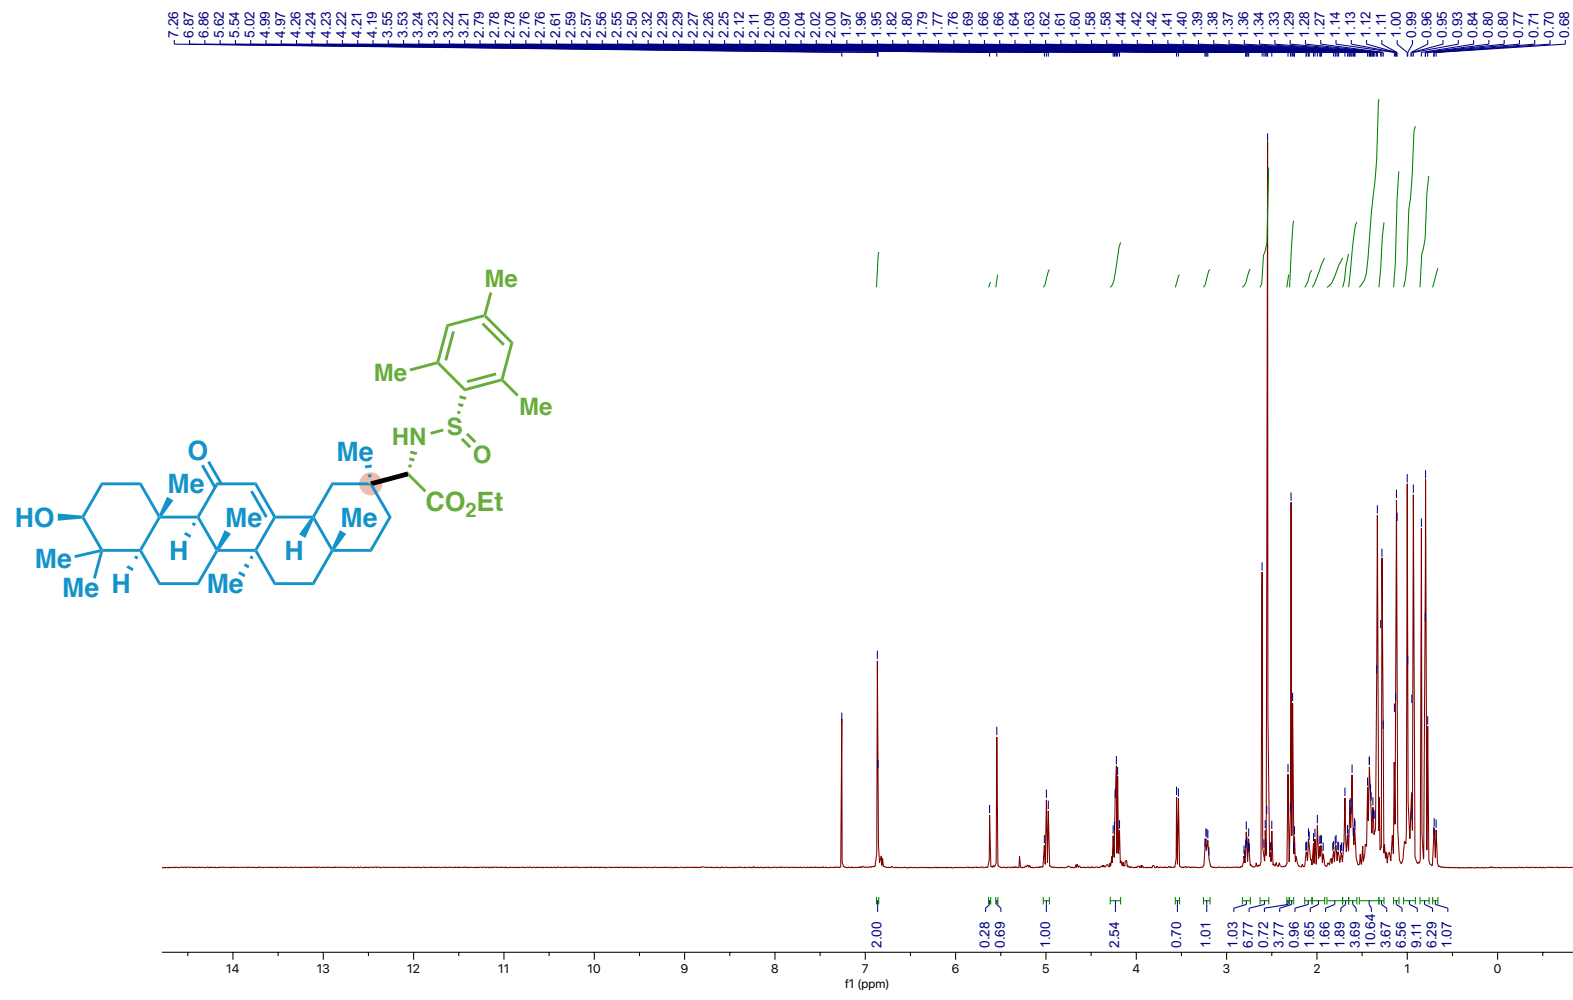

# Compound 53 <sup>13</sup>C NMR

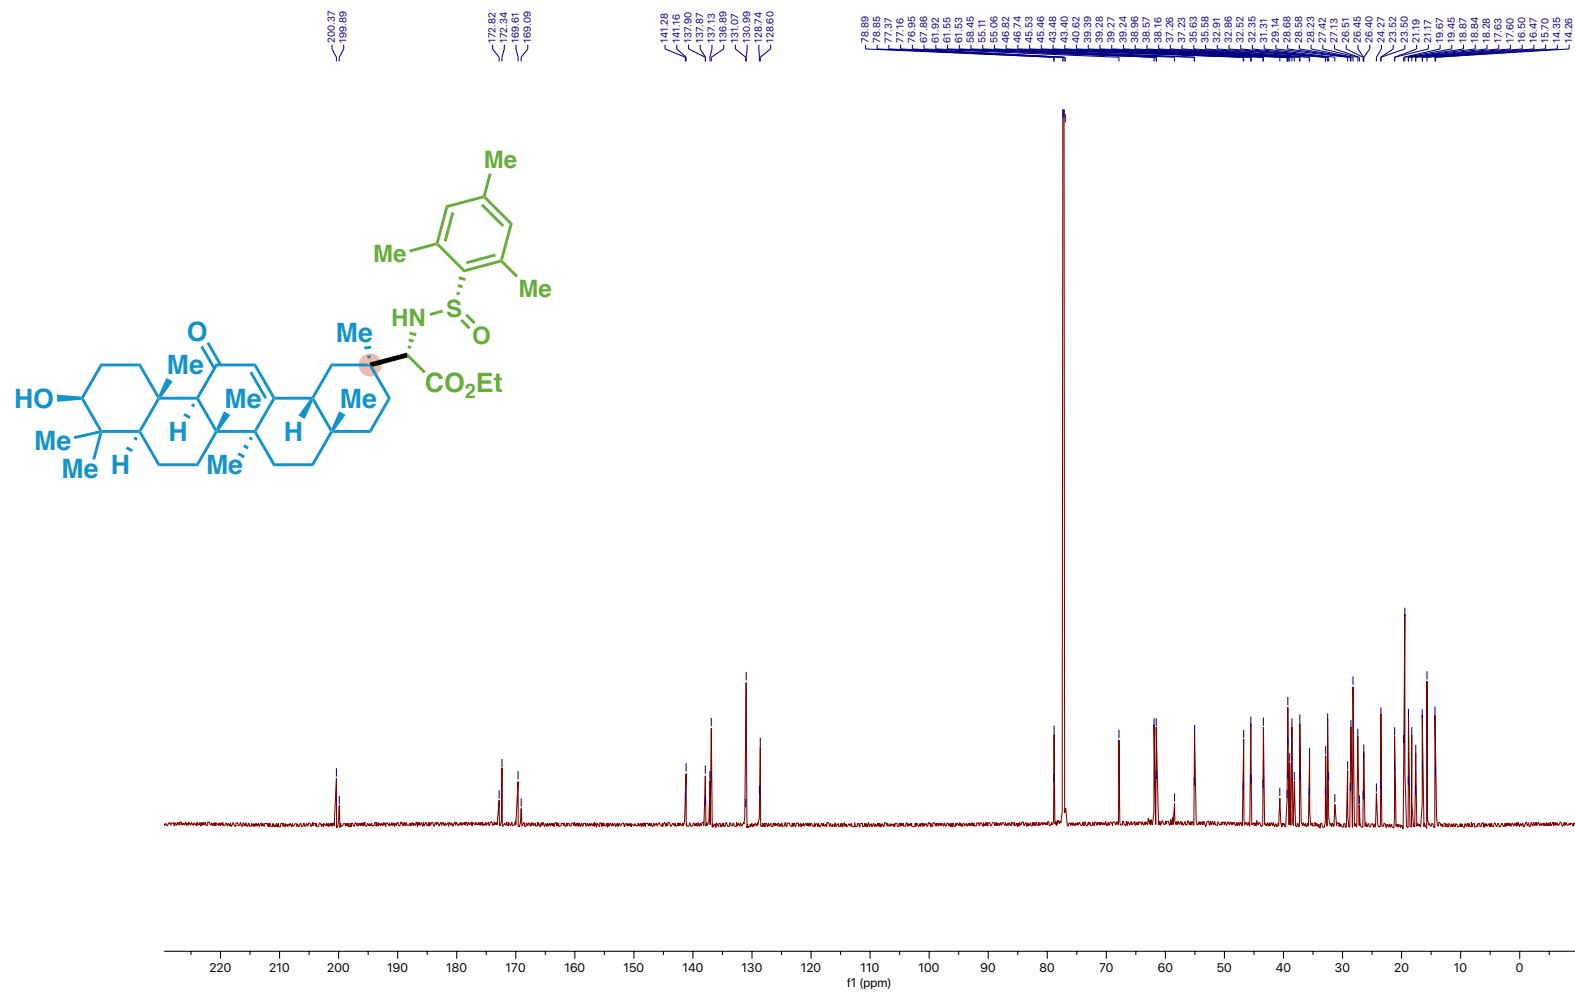

# Compound 54 <sup>1</sup>H NMR

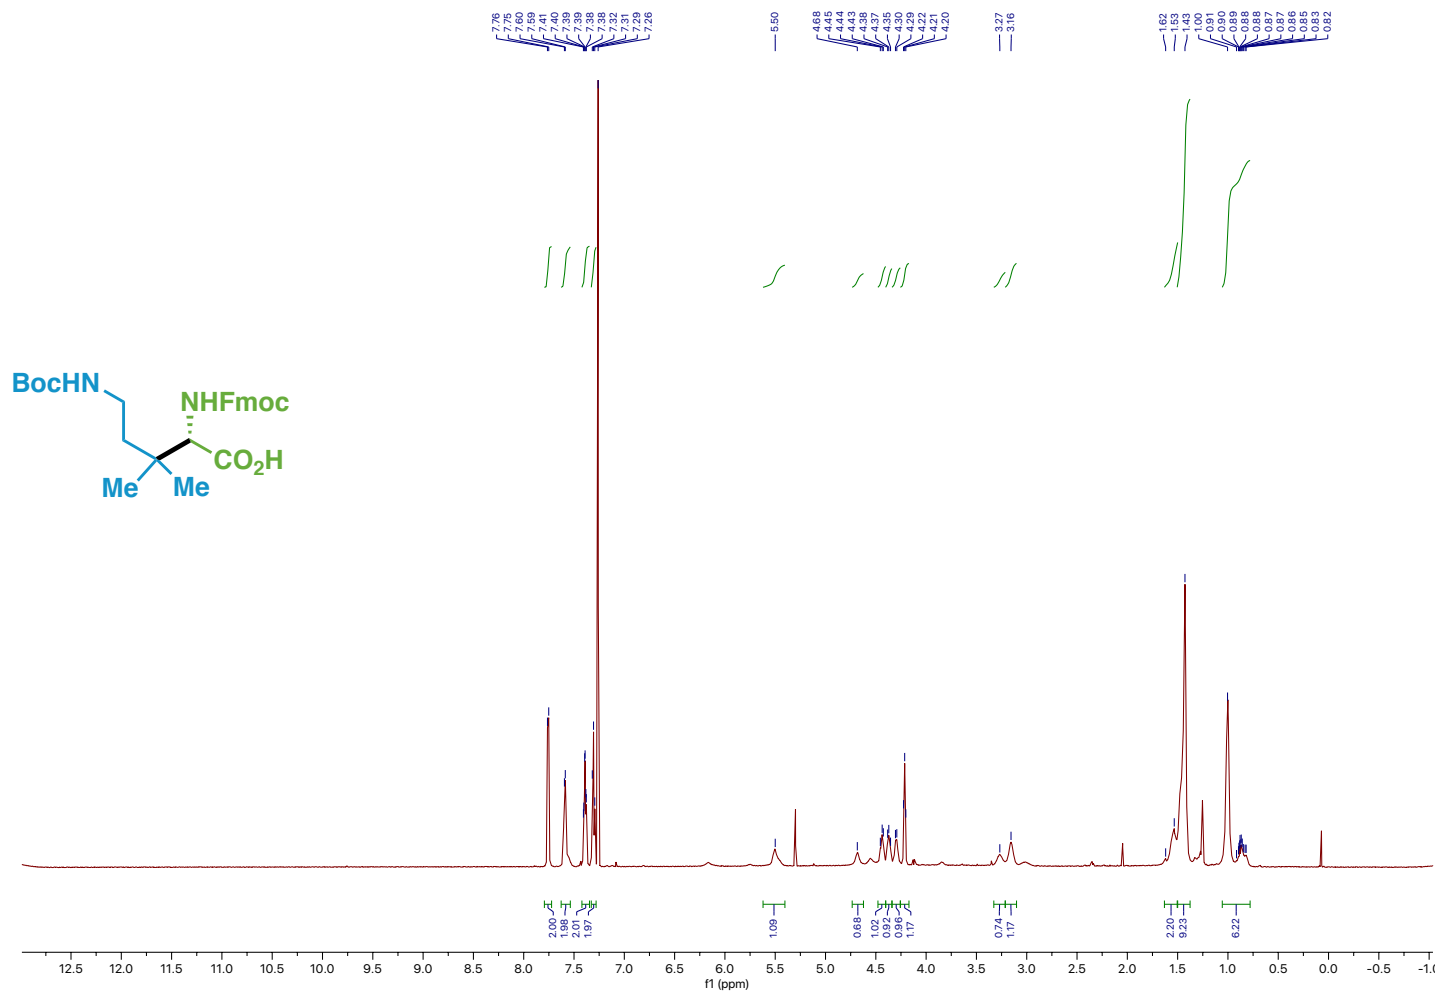

# Compound 54 <sup>13</sup>C NMR

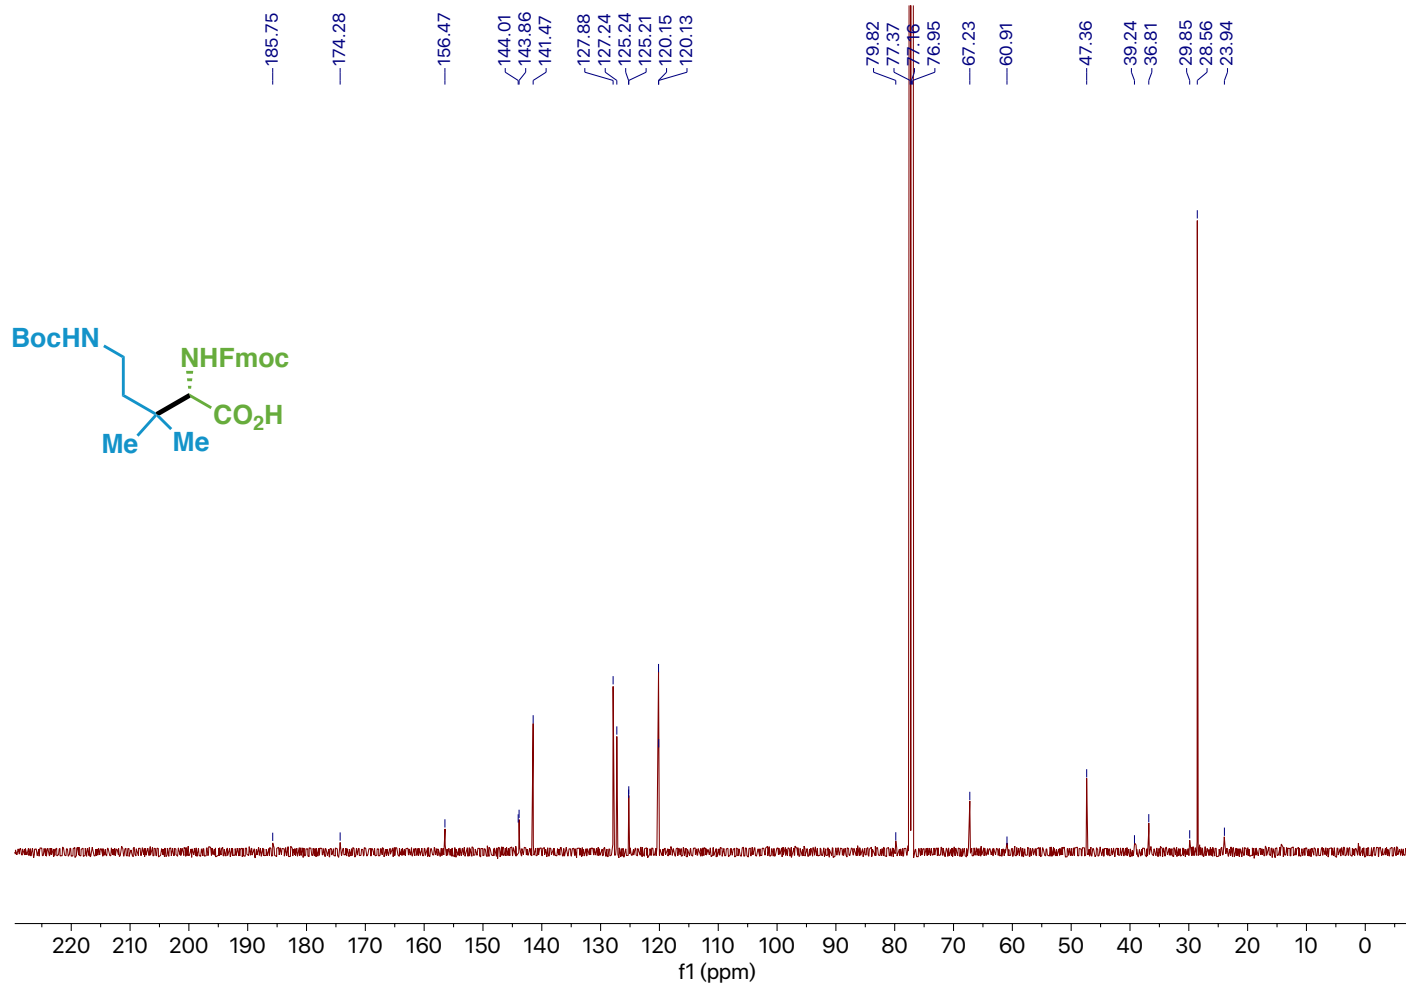



# Compound 56 <sup>1</sup>H NMR

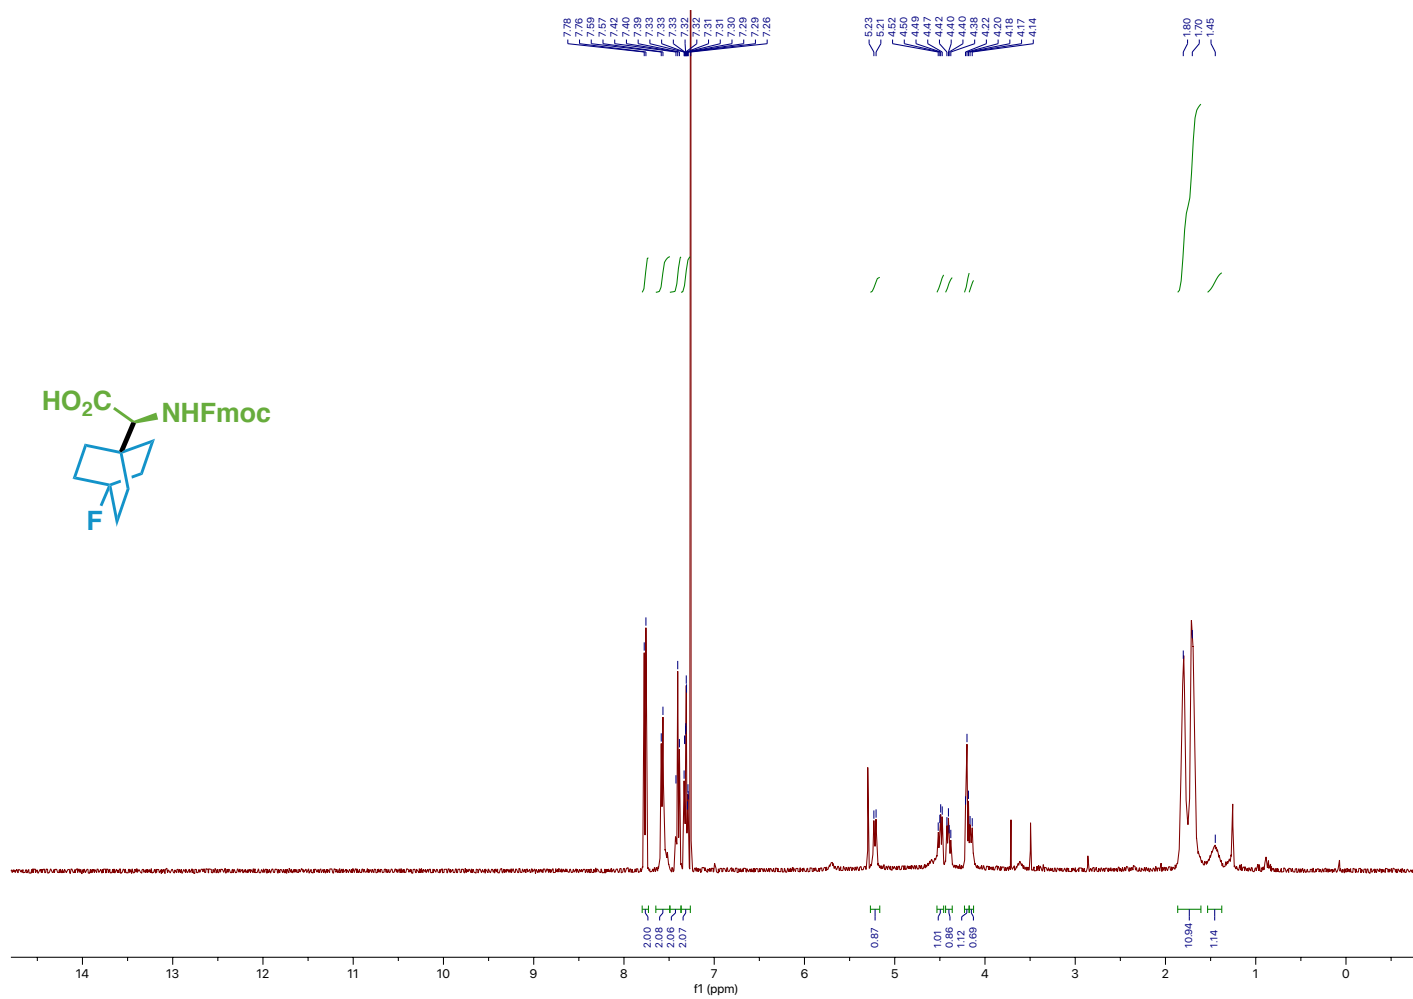

# Compound 56 <sup>13</sup>C NMR

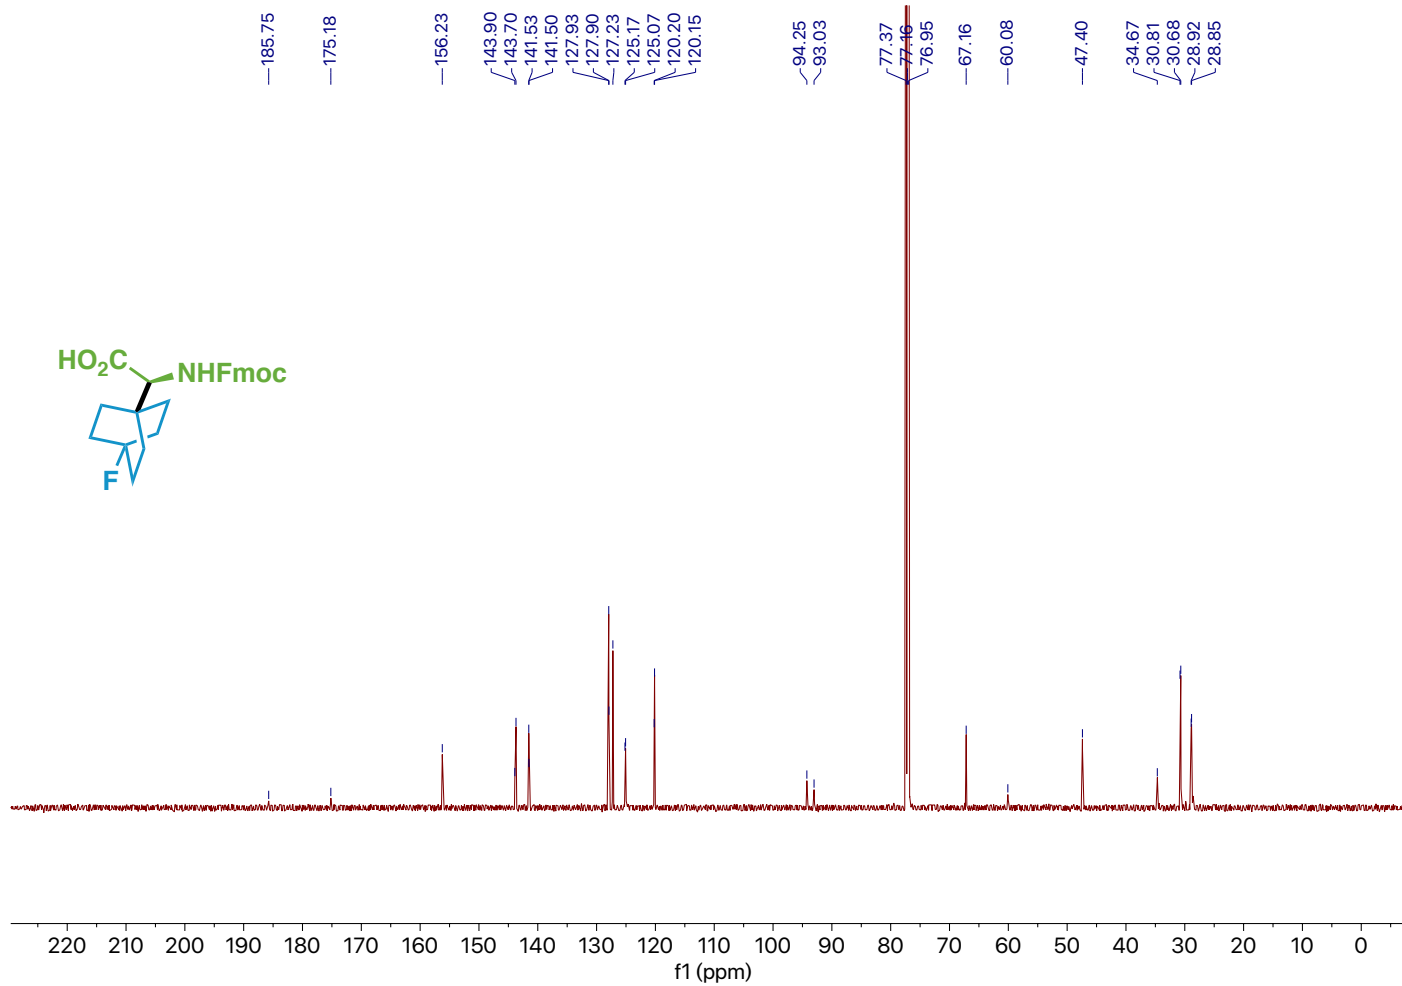

# Compound 56 $^{19}\text{F}$ NMR

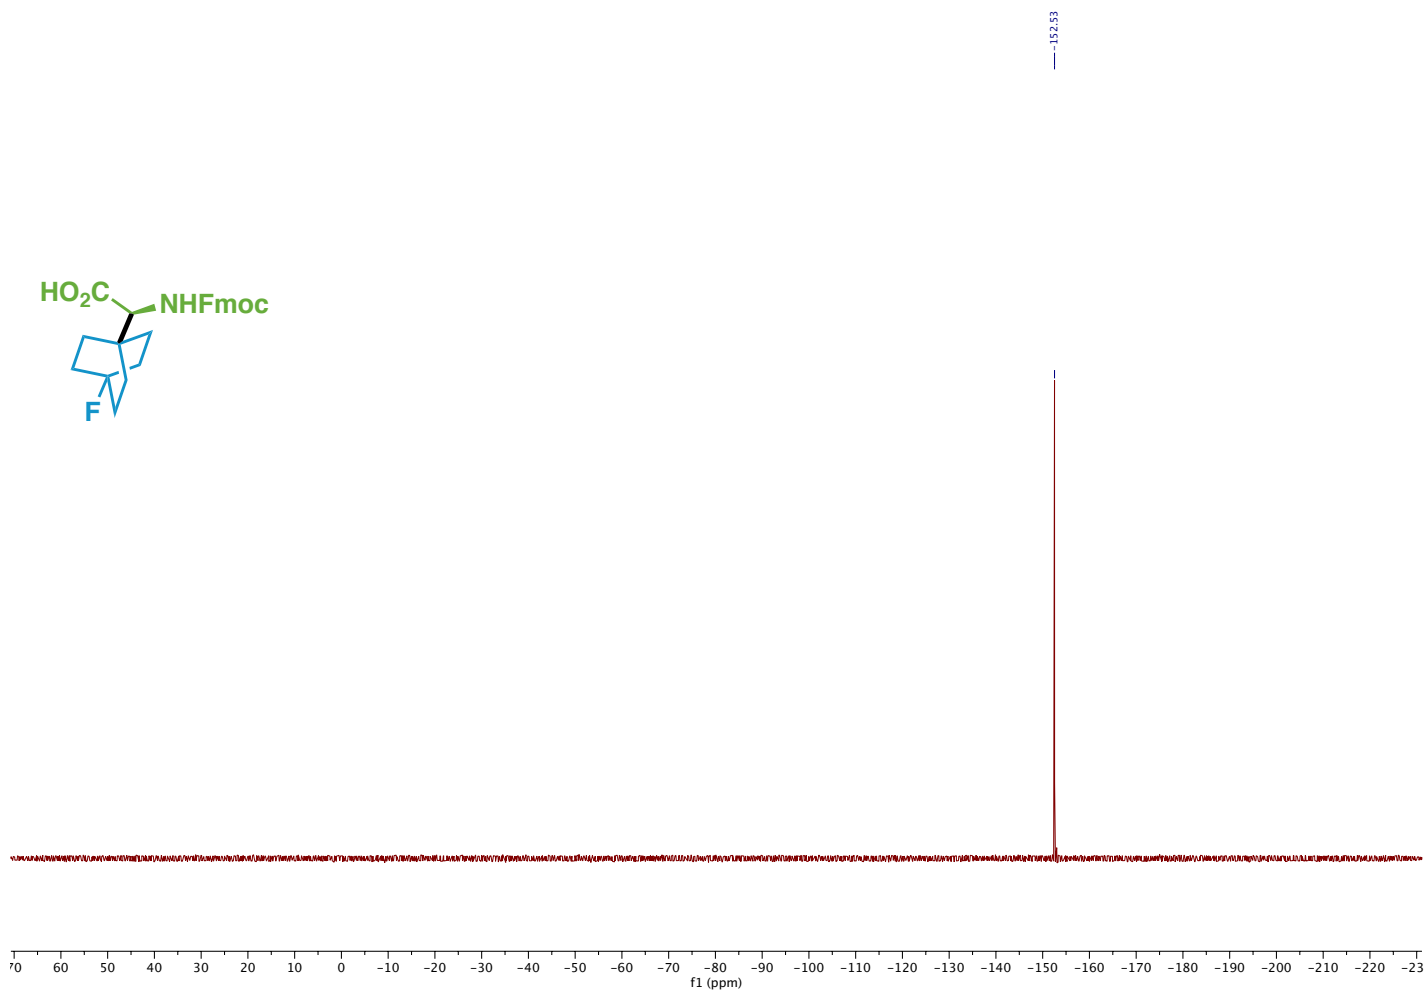

# Compound 56 HSQC 2D NMR

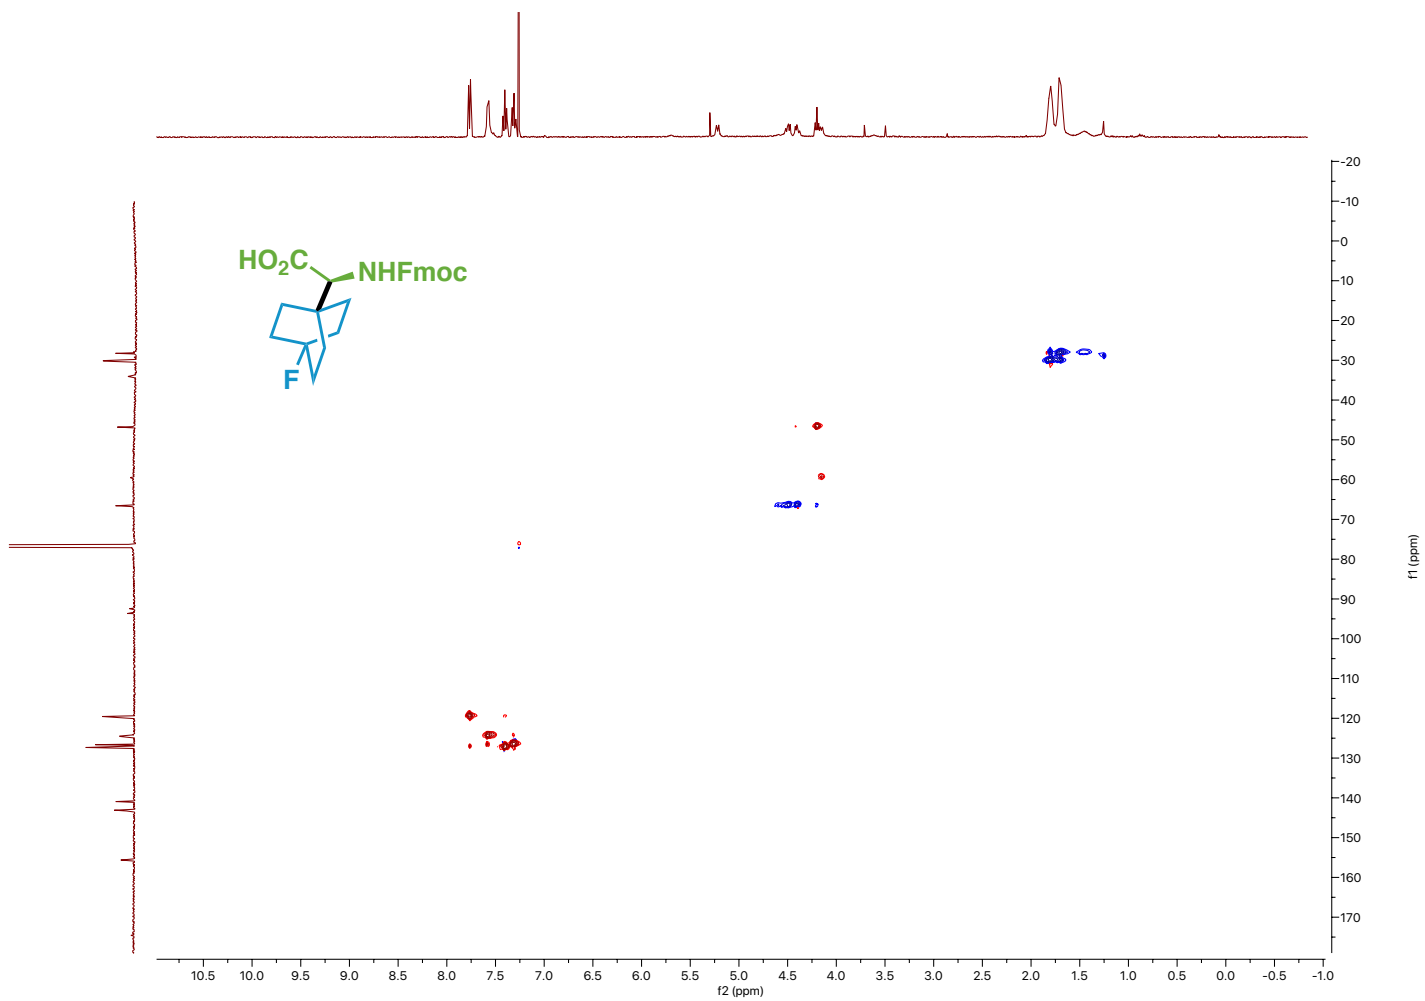

# Compound 58 <sup>1</sup>H NMR

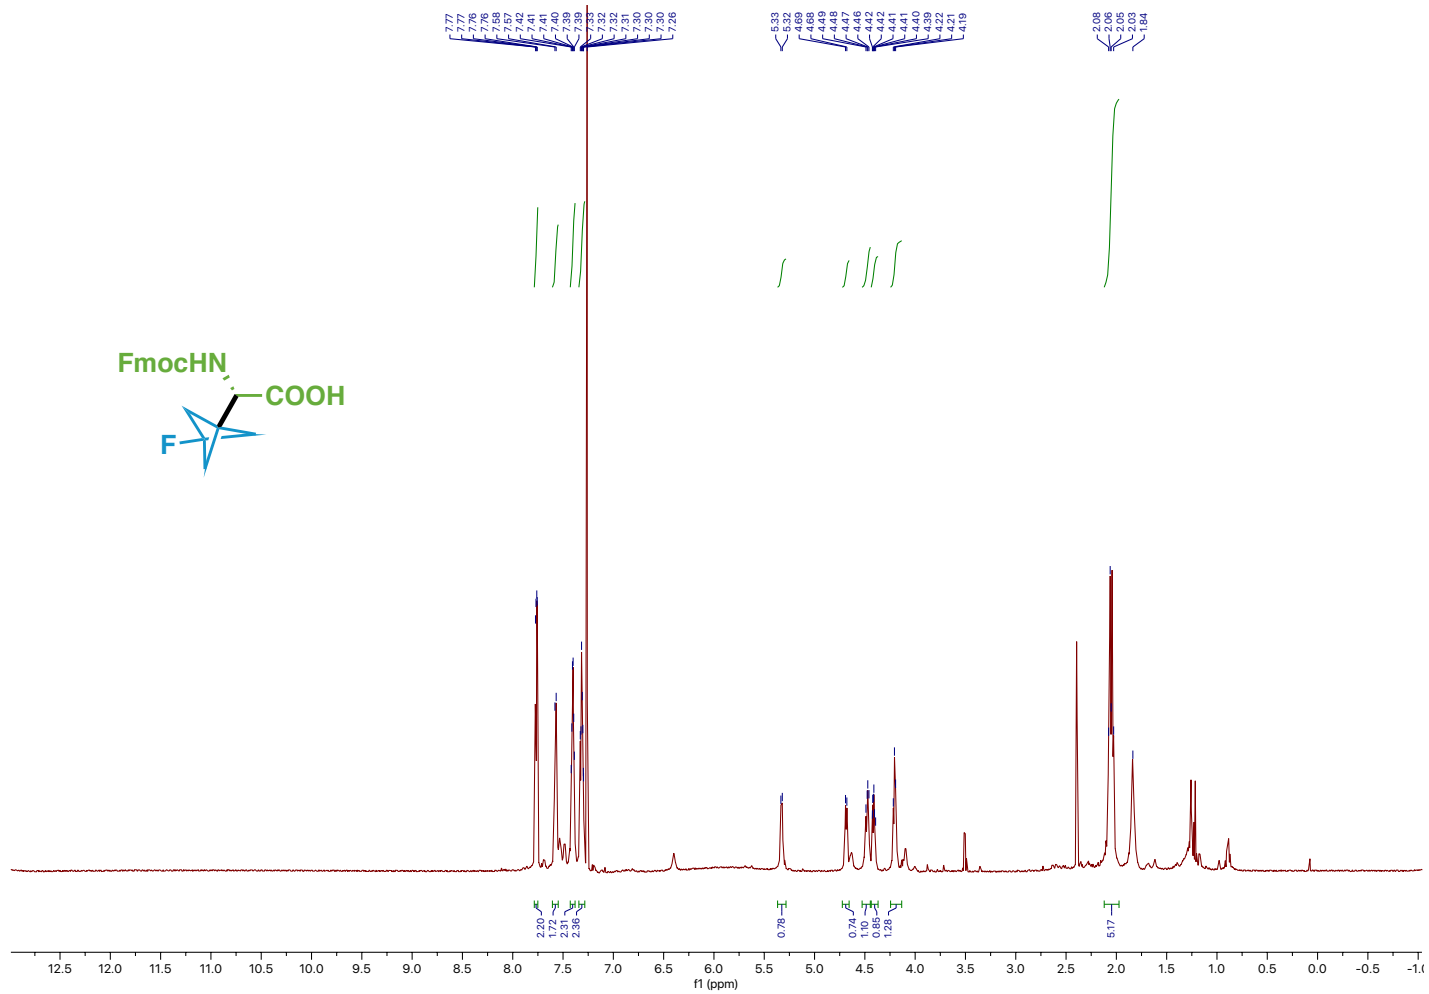

# Compound 58 <sup>13</sup>C NMR

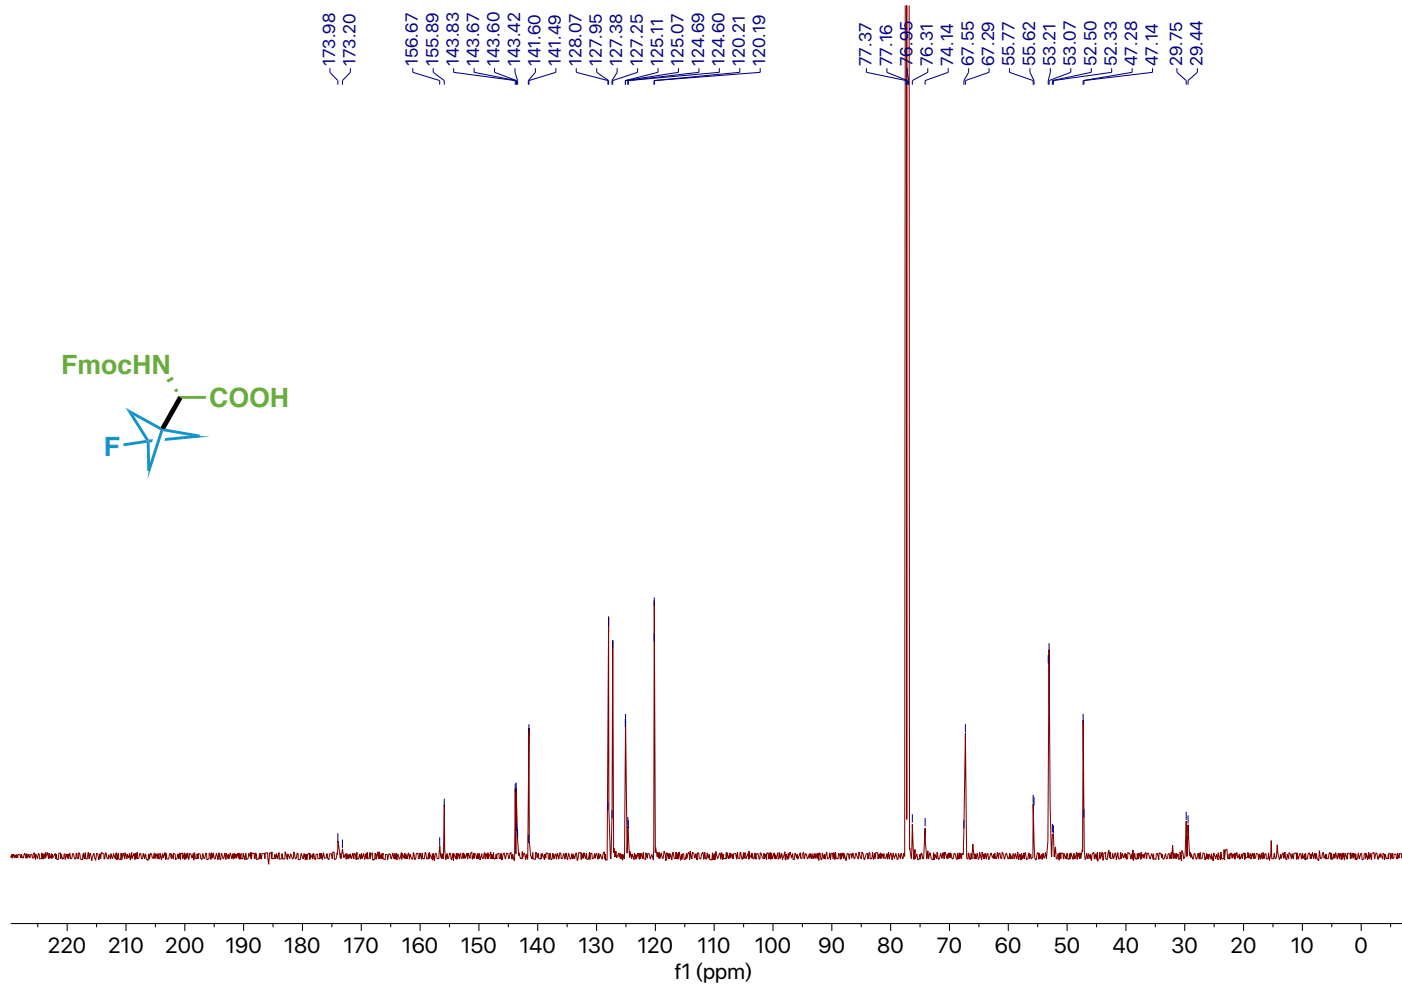

# Compound 58 <sup>19</sup>F NMR

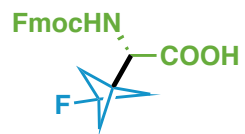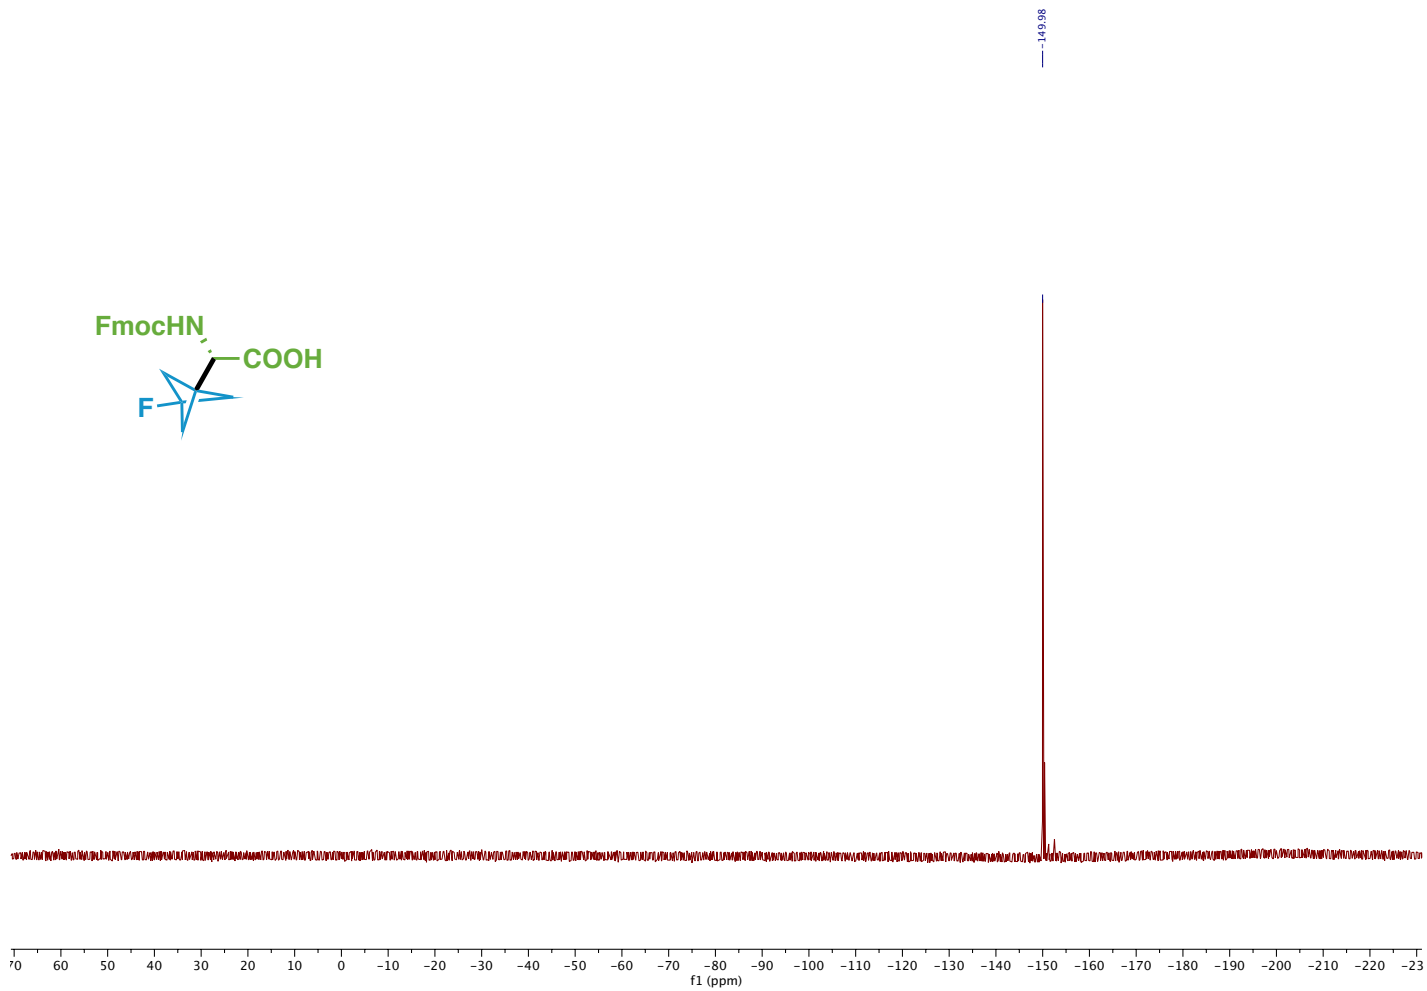

# Compound 59 <sup>1</sup>H NMR

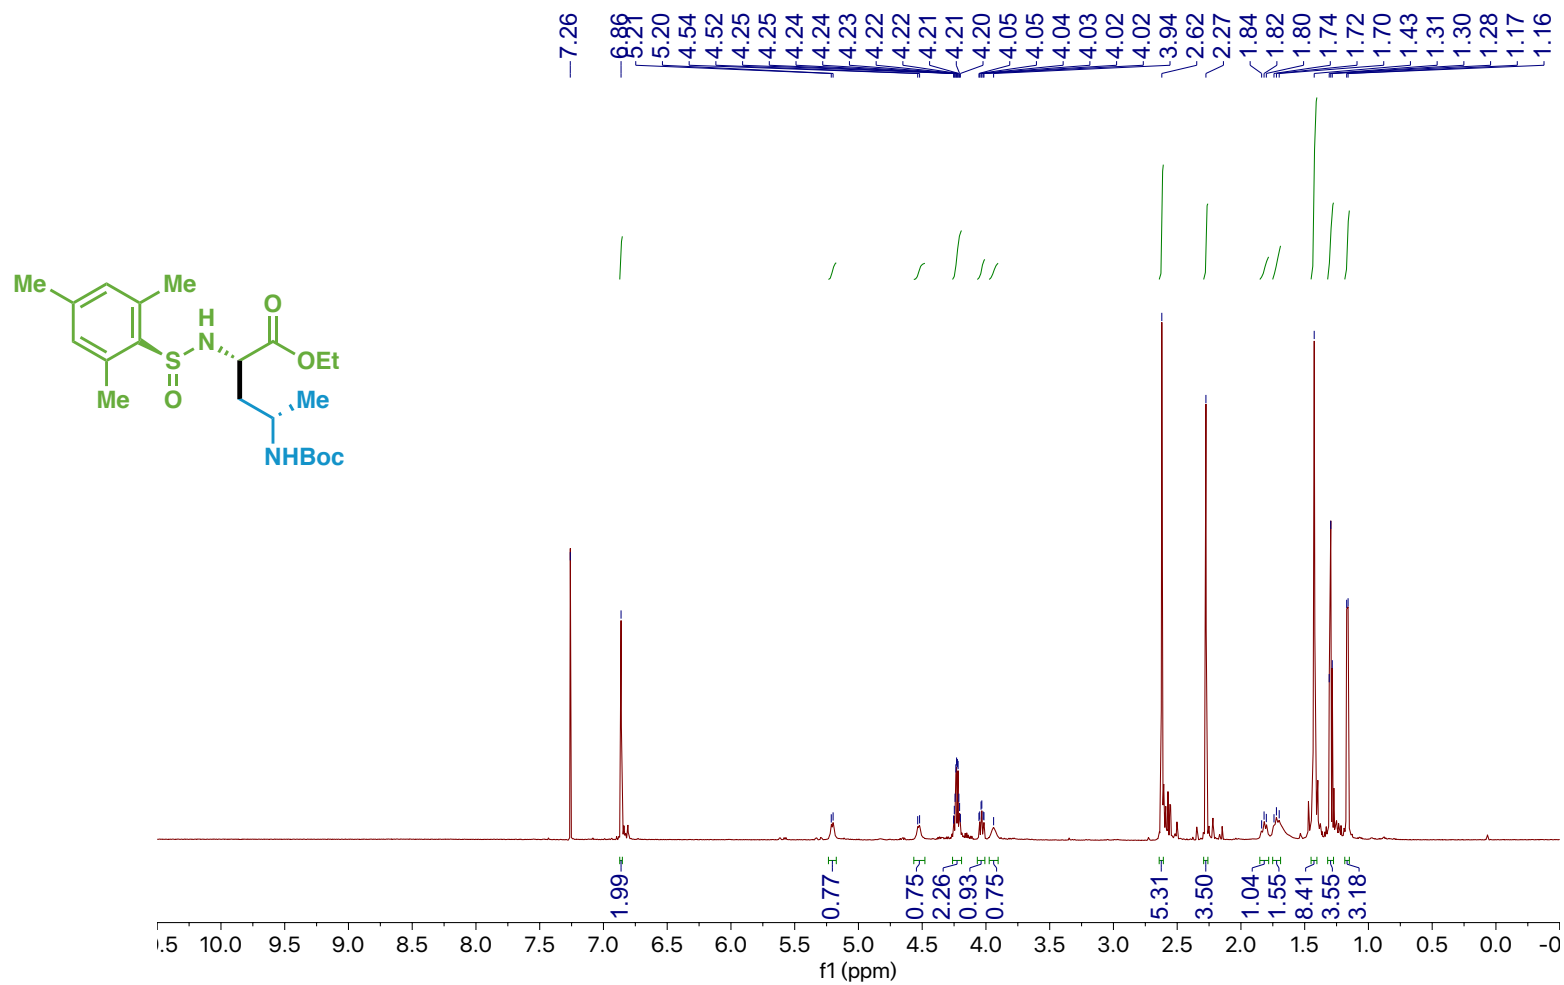



# Compound 59 <sup>13</sup>C NMR

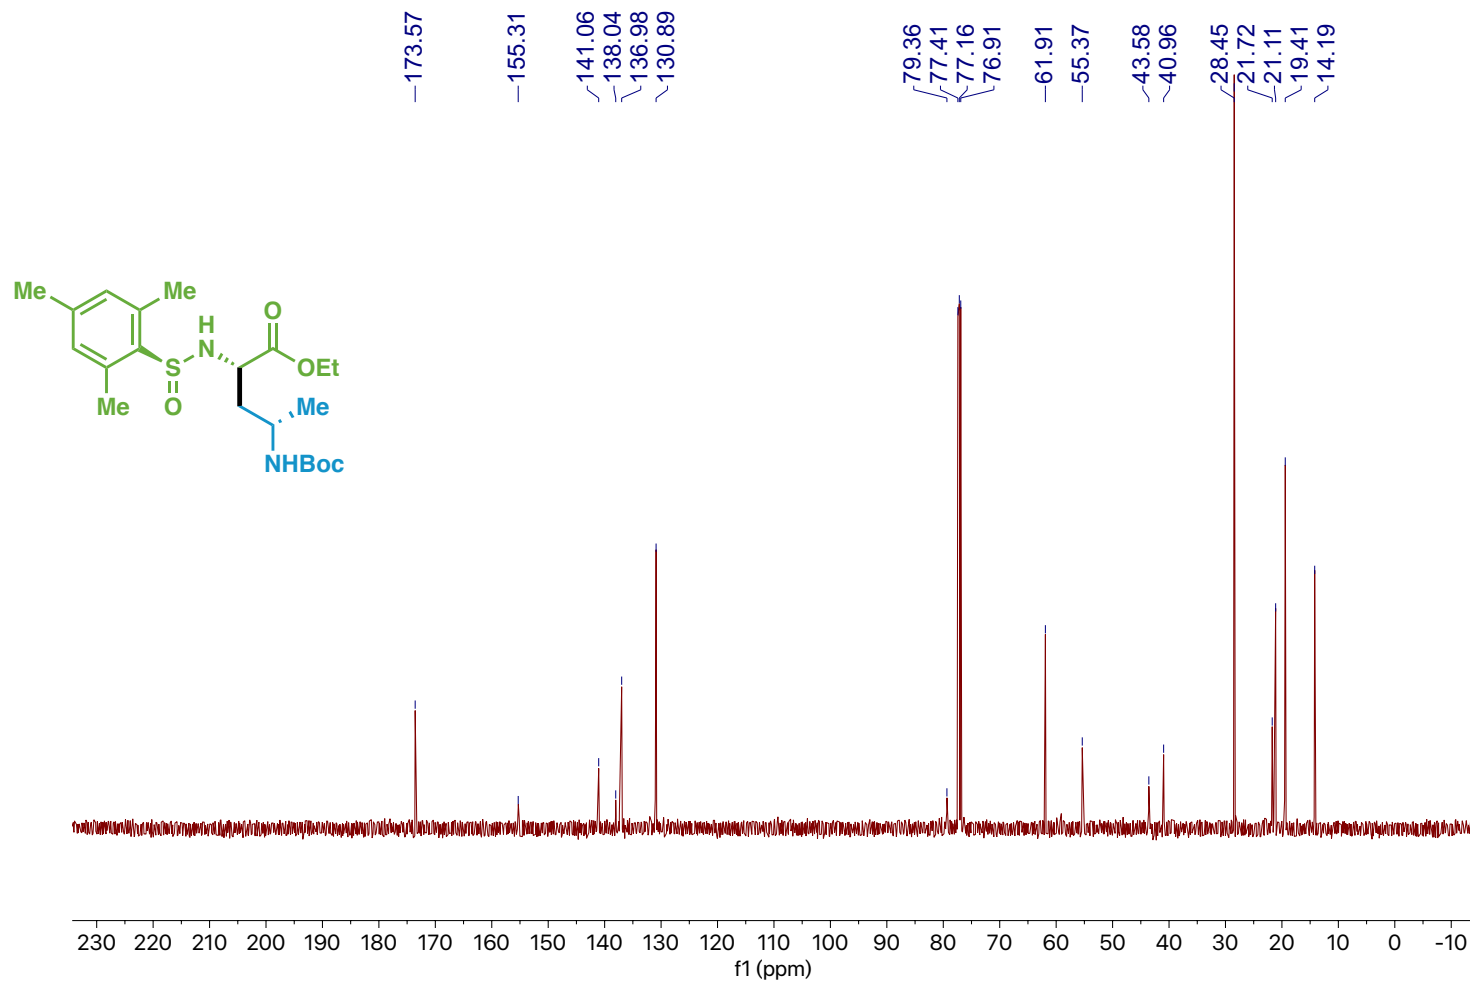



# Compound 60 <sup>13</sup>C NMR

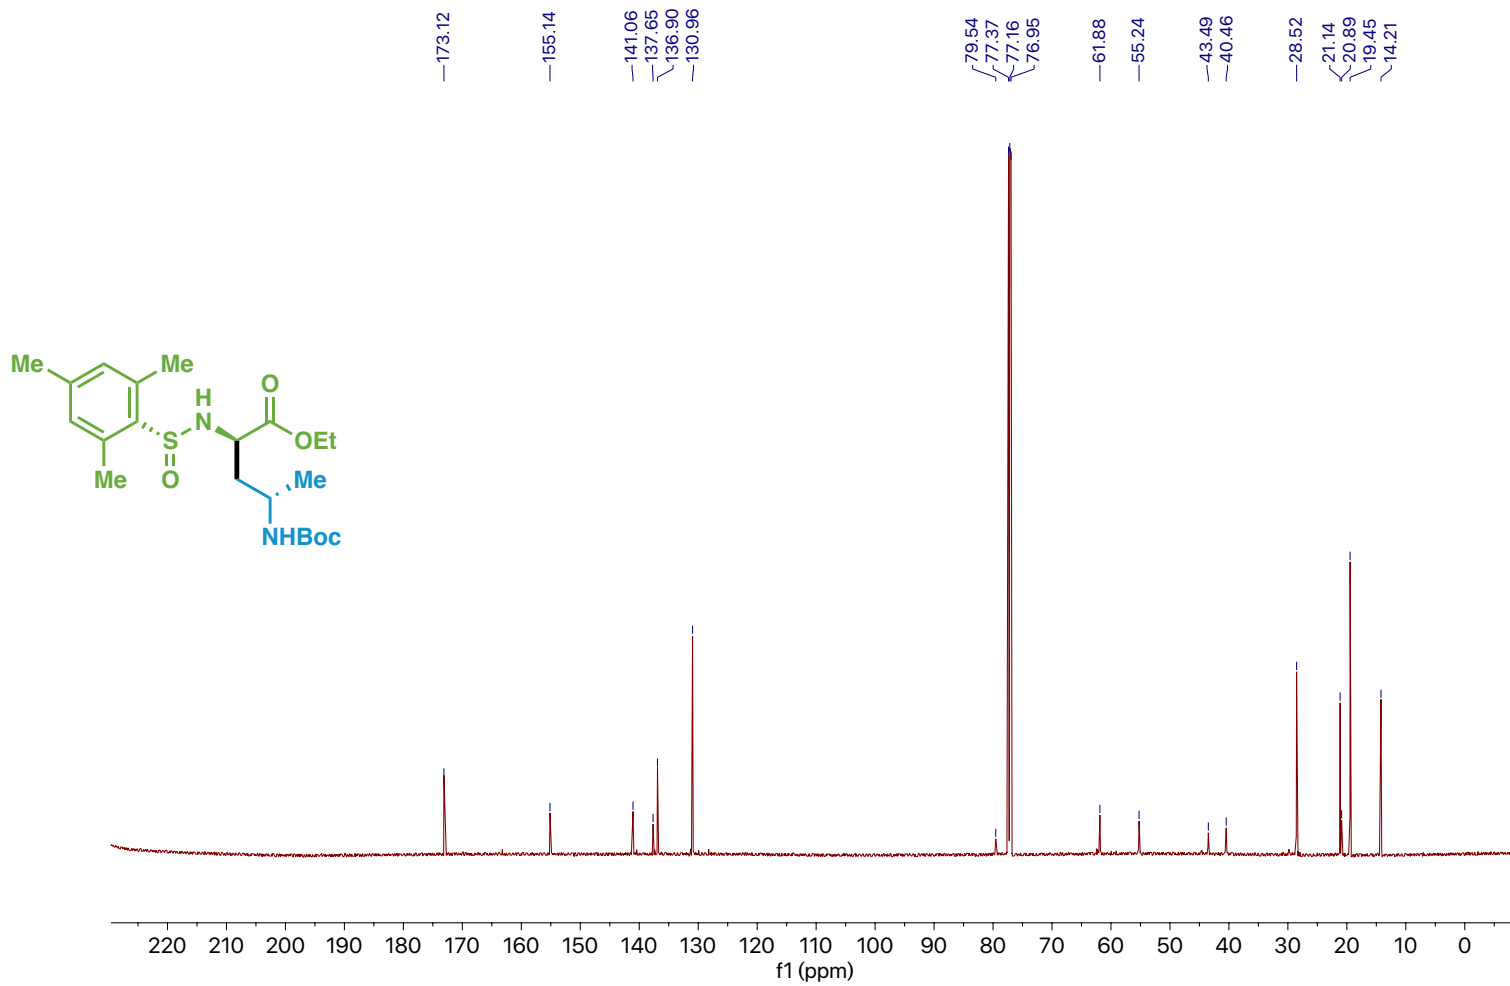

# Compound 61 <sup>1</sup>H NMR

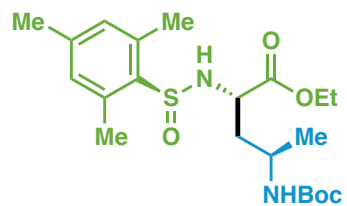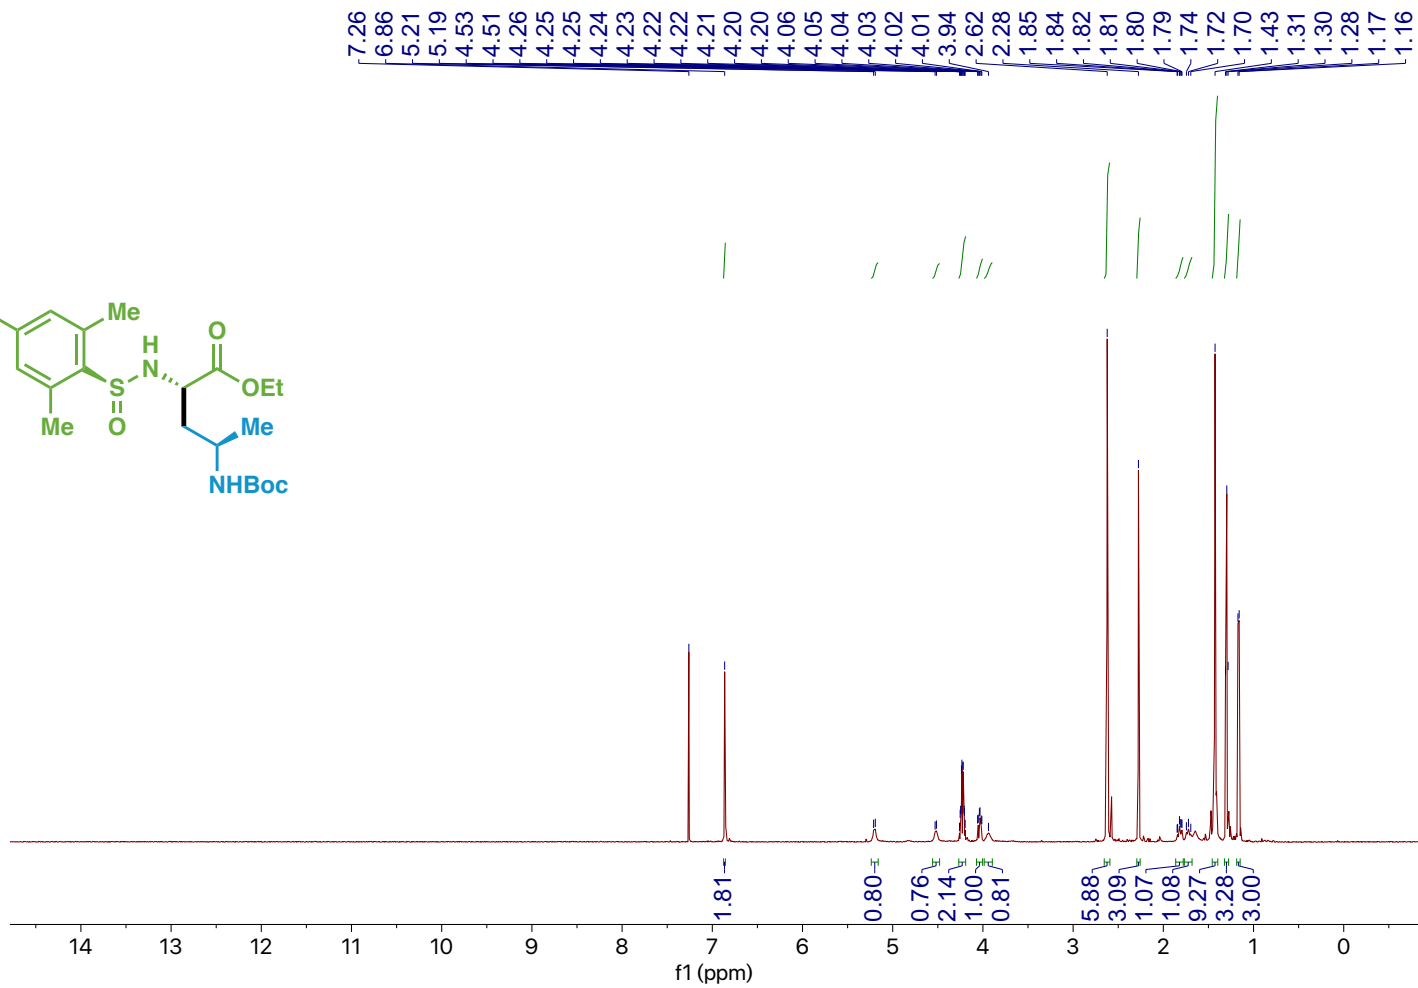

# Compound 61 <sup>13</sup>C NMR

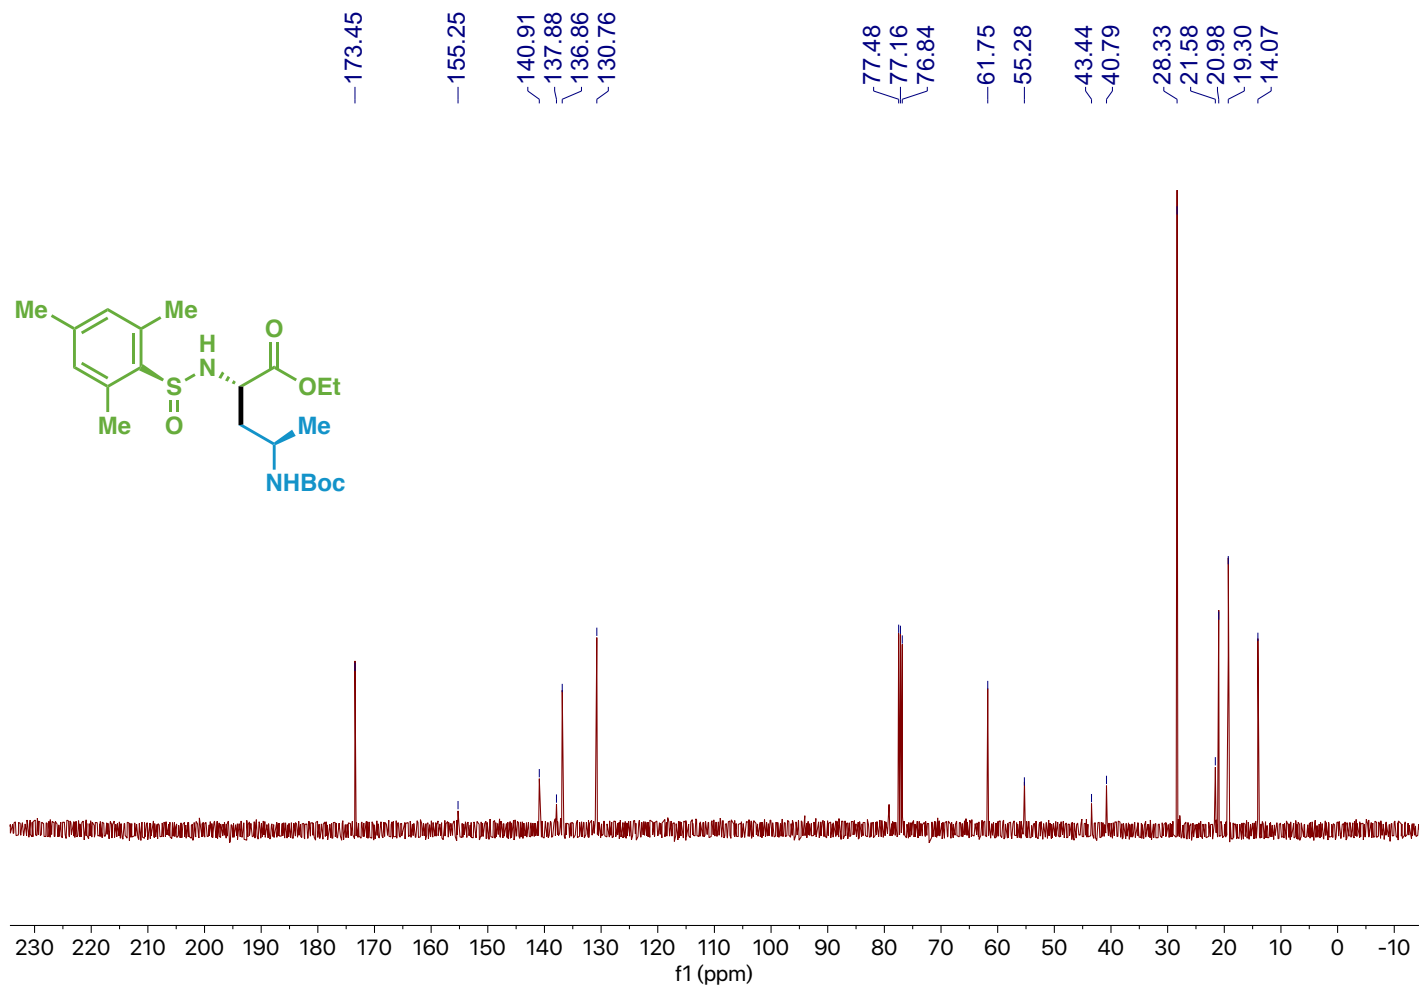



# Compound 62 <sup>13</sup>C NMR

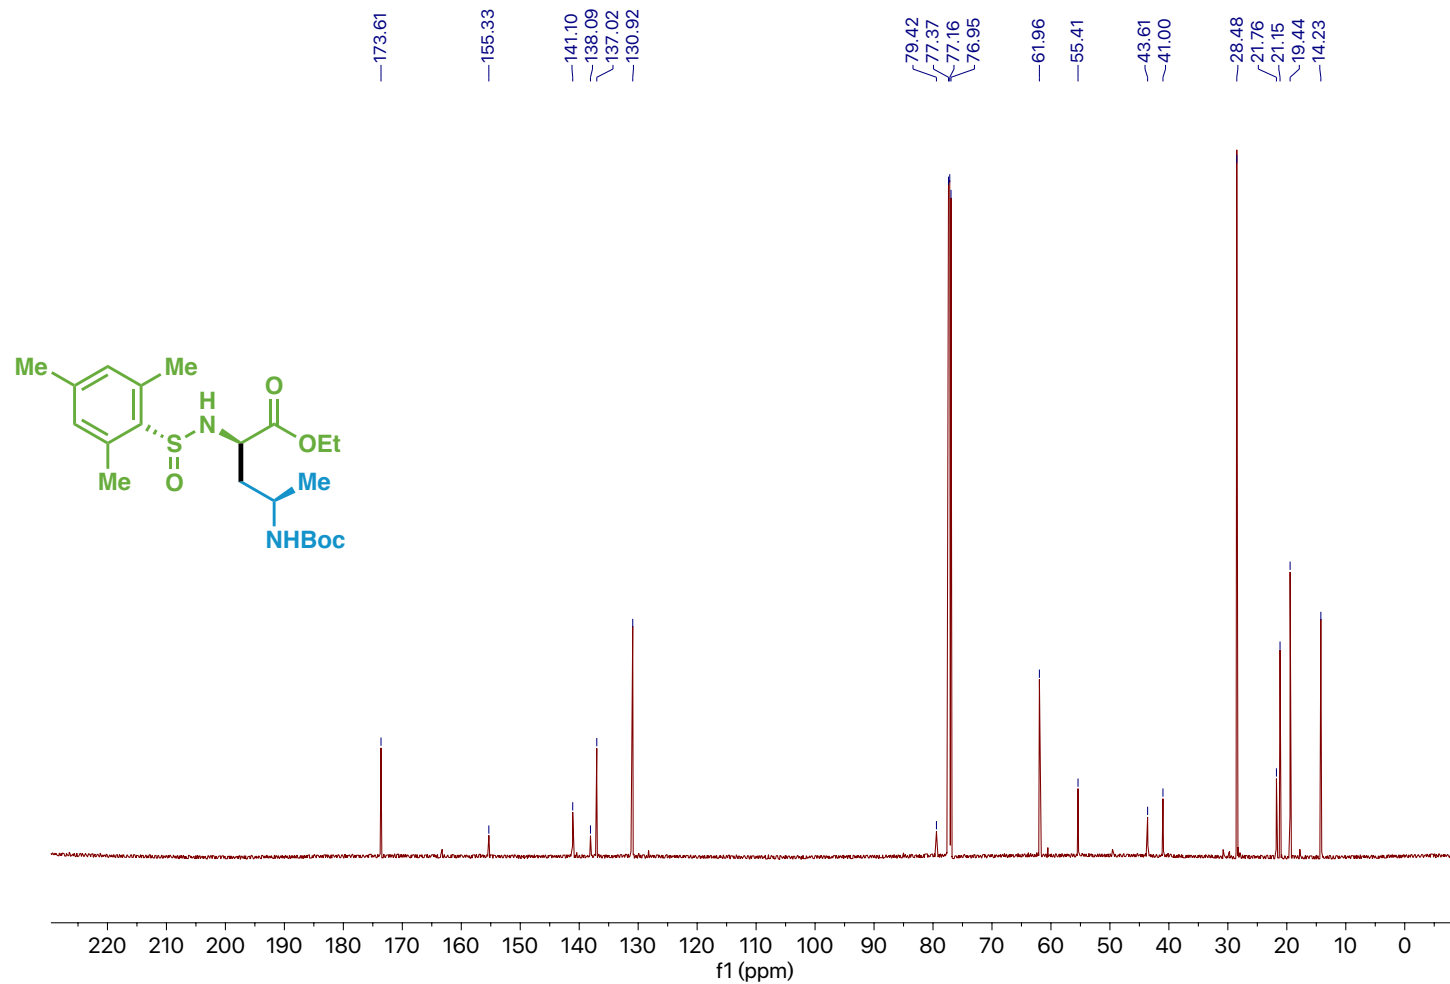

# Compound 63 <sup>1</sup>H NMR

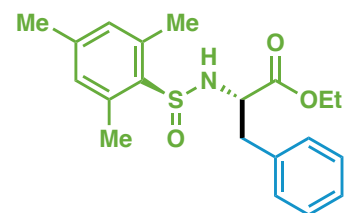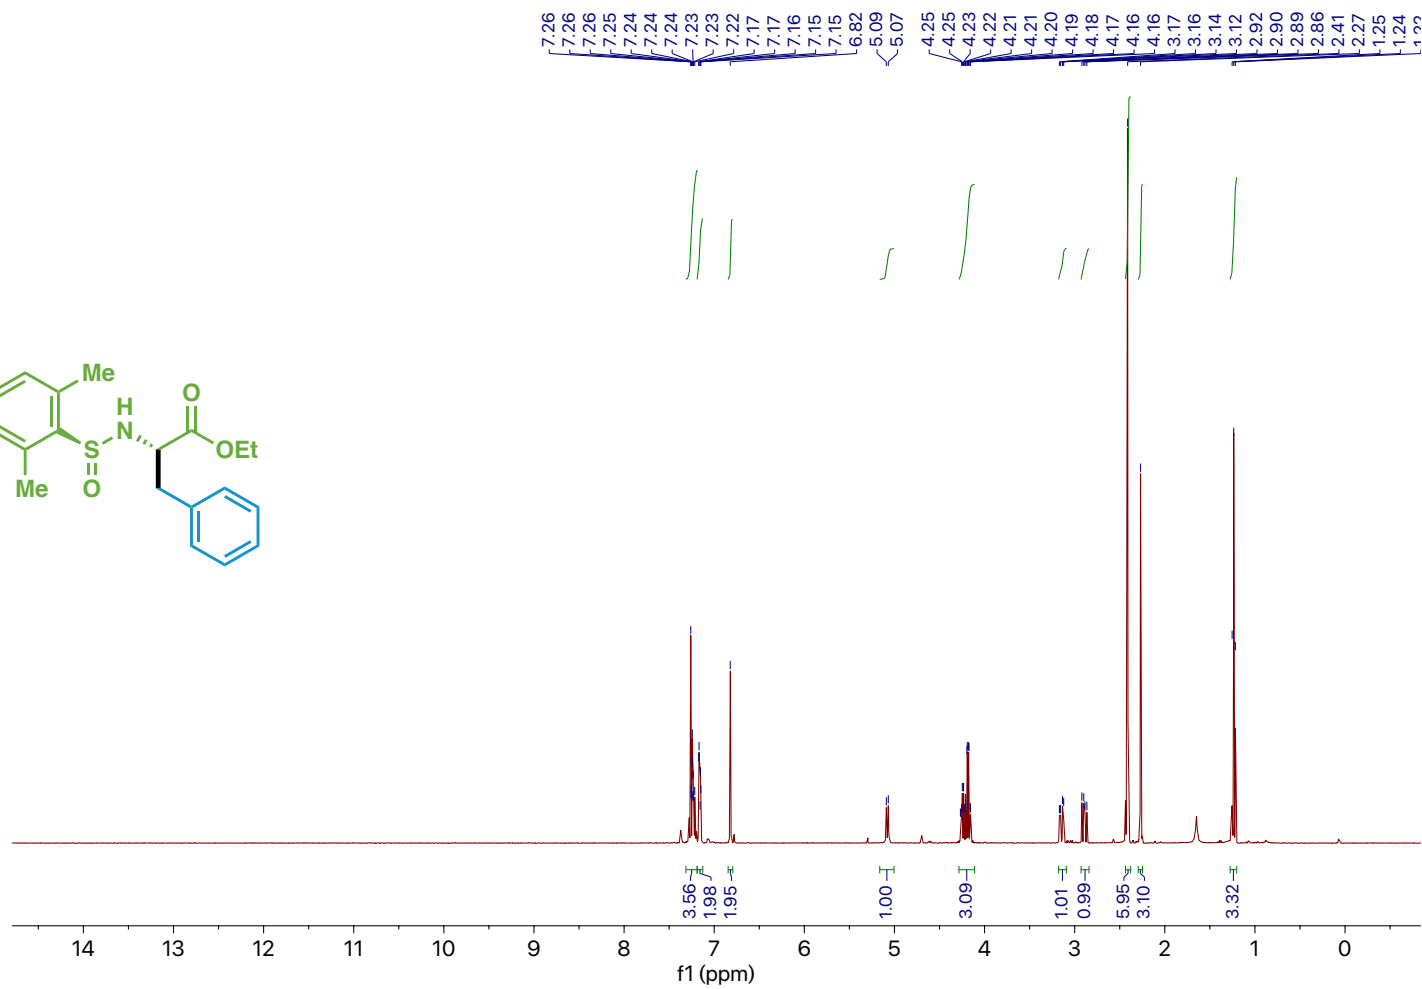



# Compound 63 <sup>13</sup>C NMR

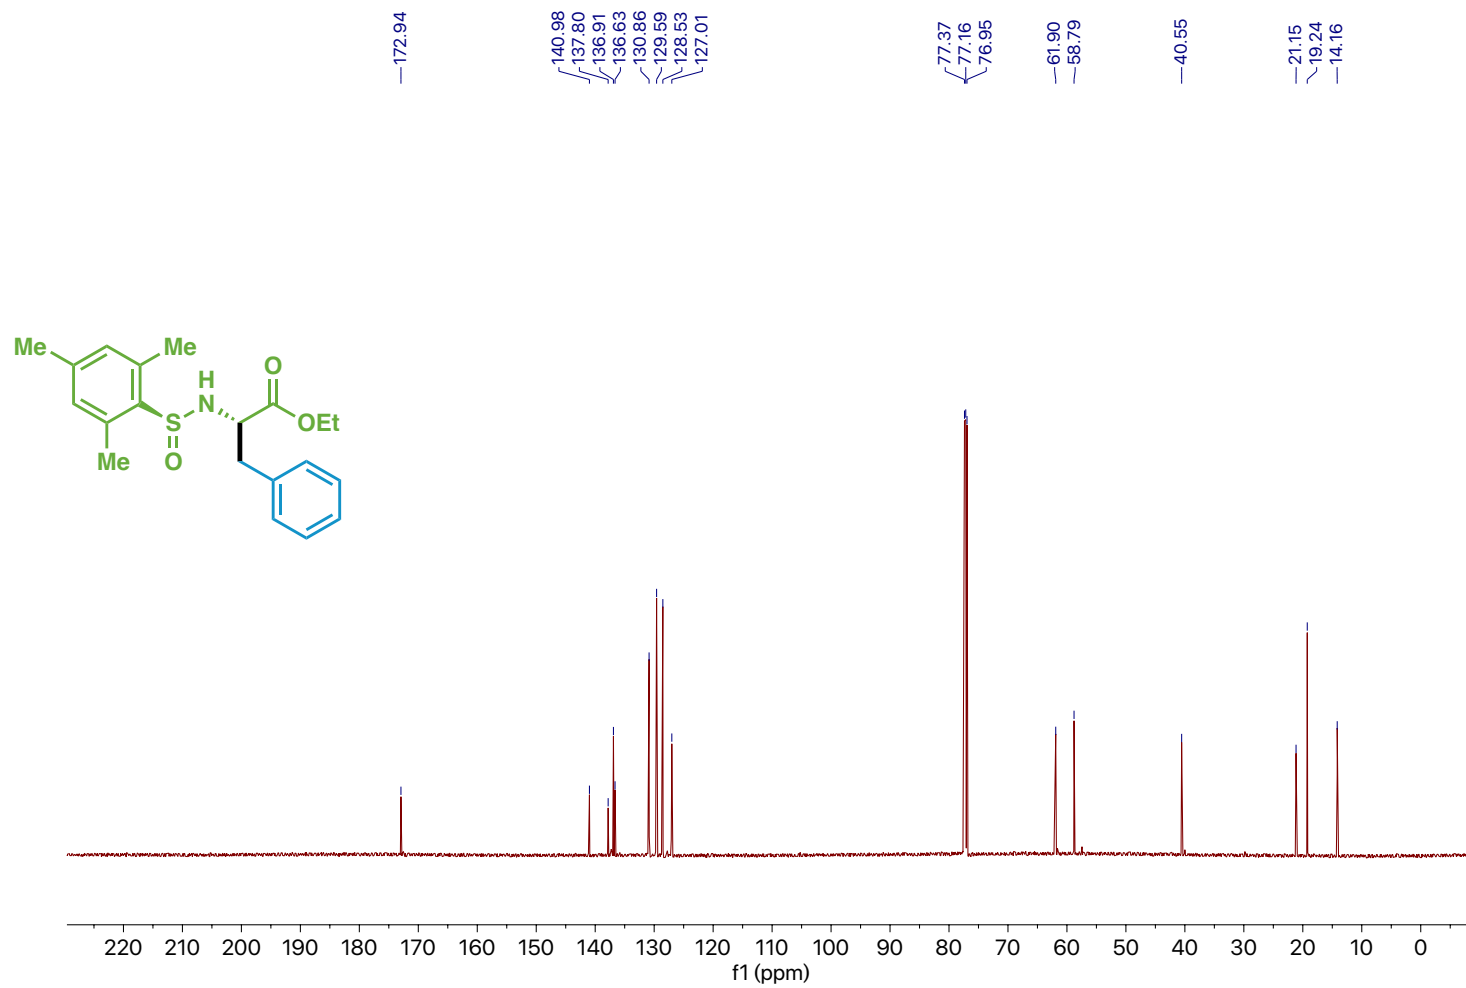

# Compound 63-a <sup>1</sup>H NMR

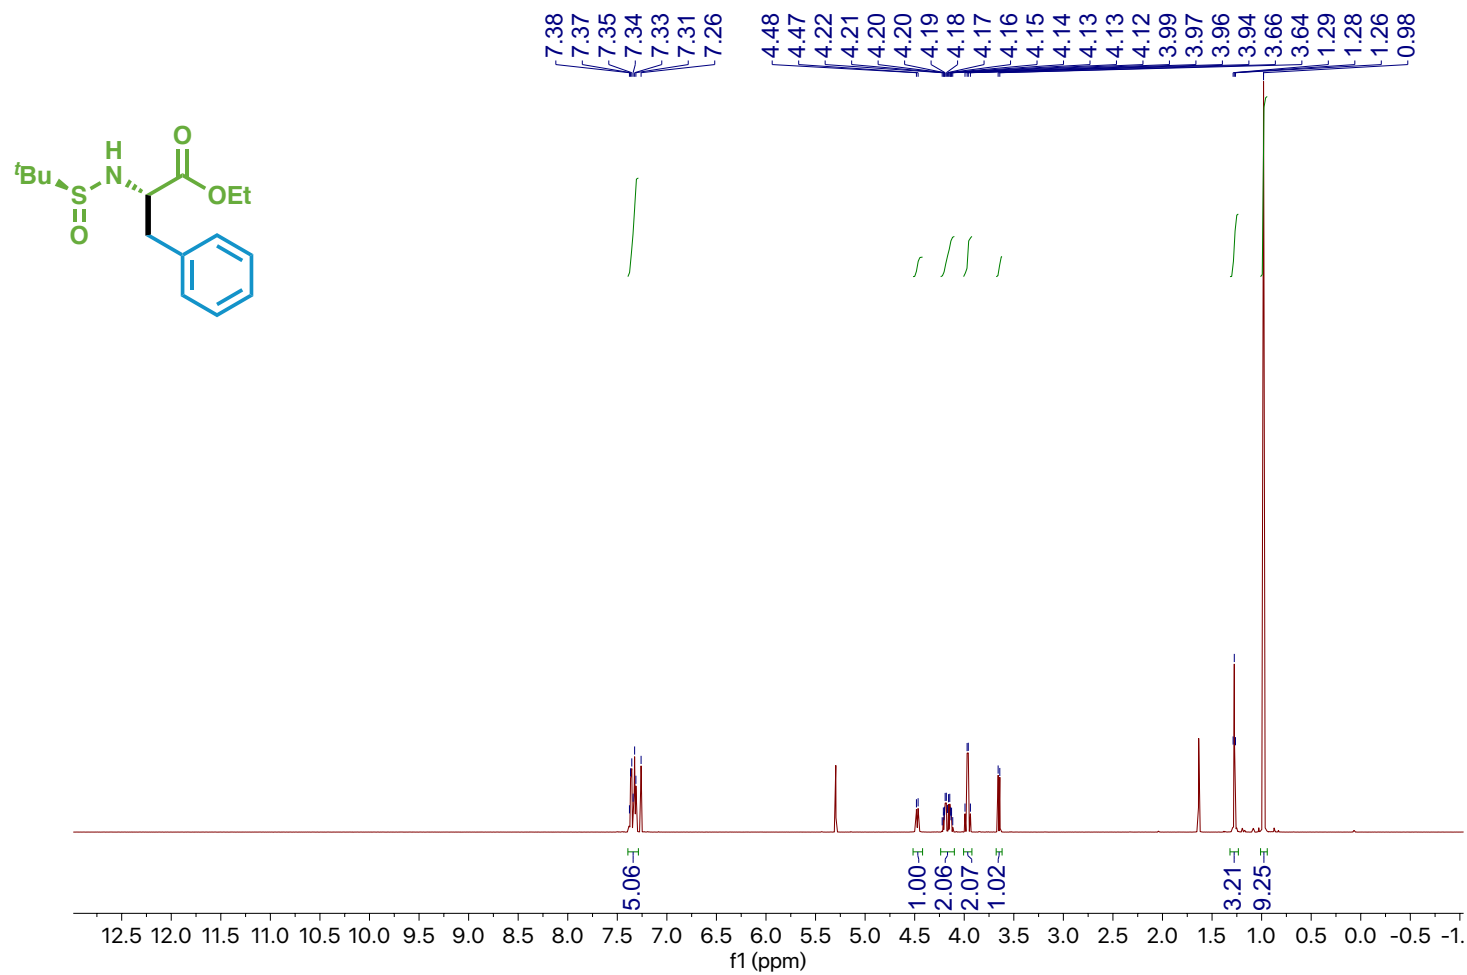

Compound 63-a <sup>13</sup>C NMR

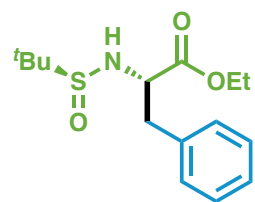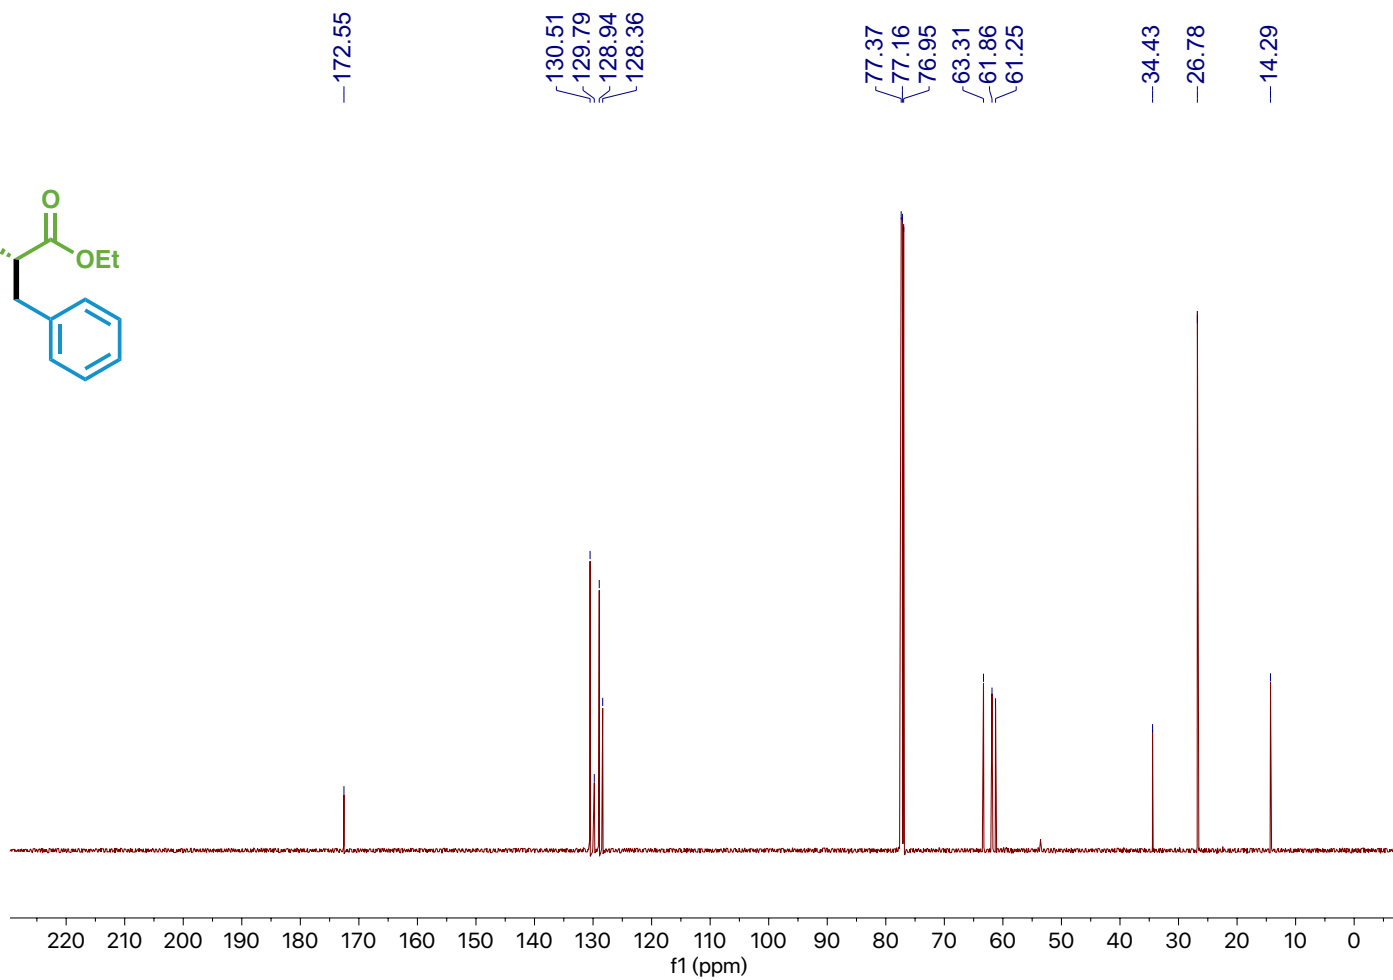

# Compound 64 <sup>1</sup>H NMR

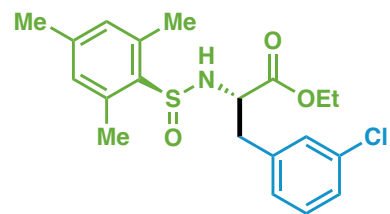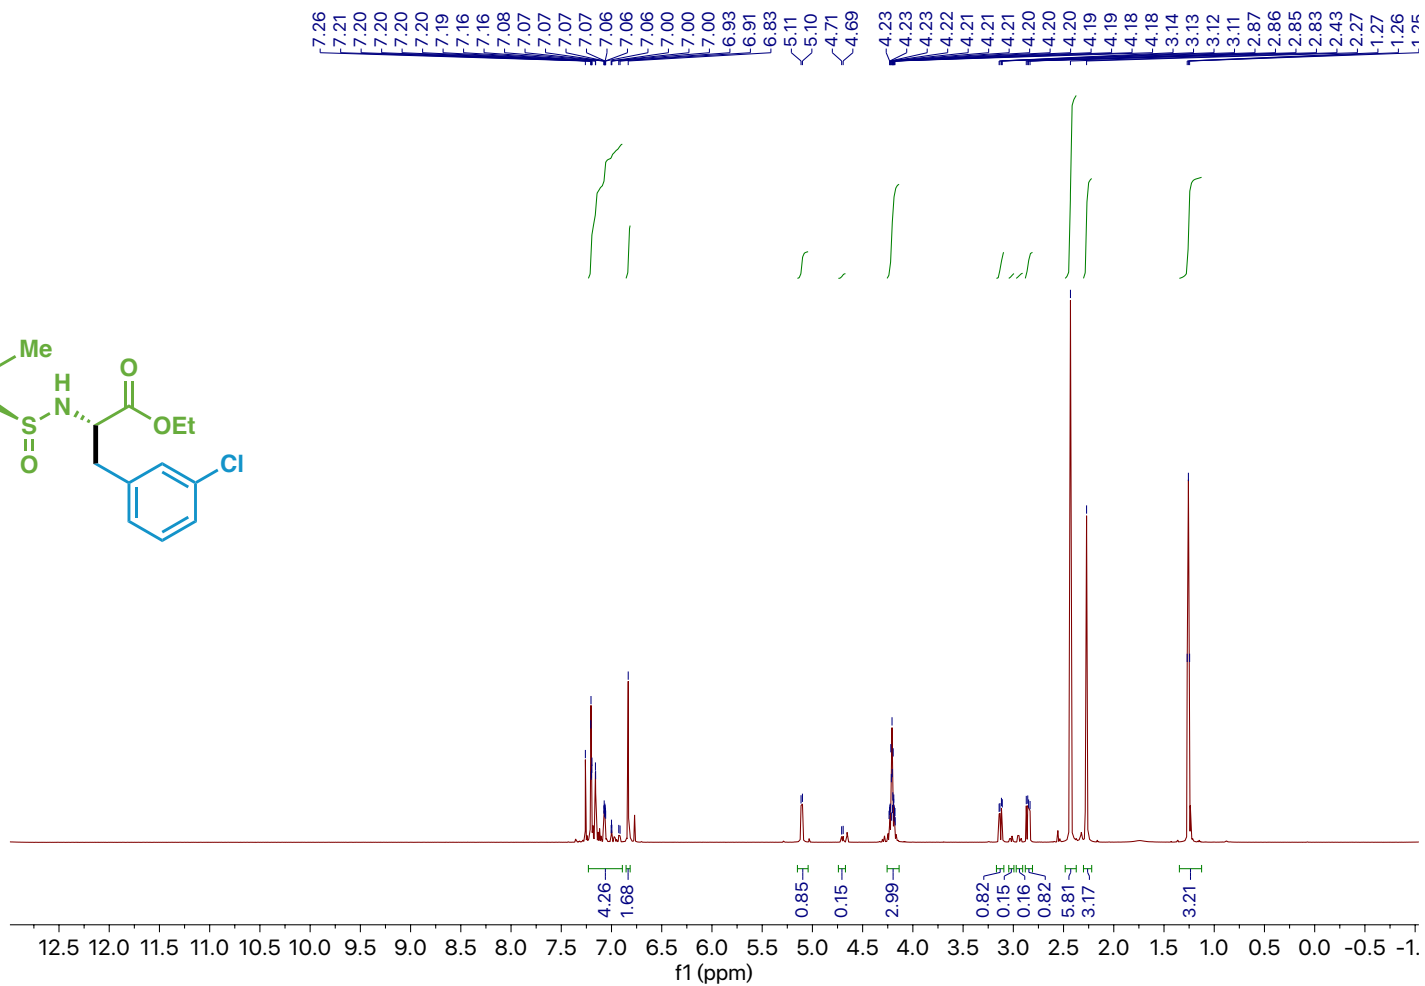

# Compound 64 <sup>13</sup>C NMR

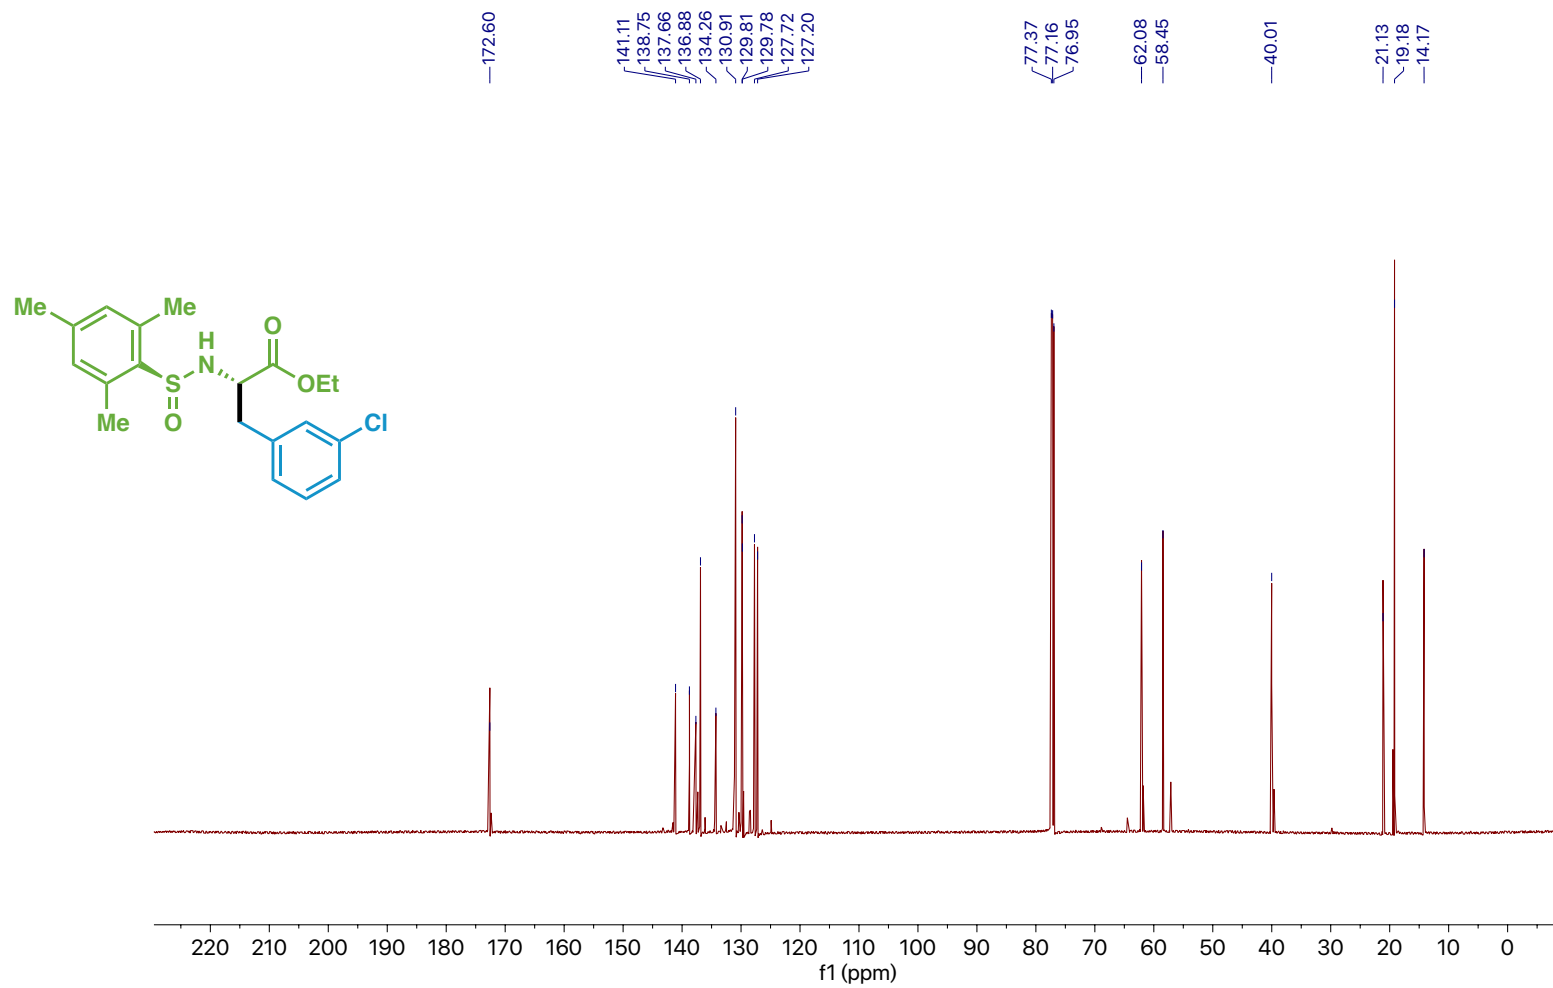

# Compound 65 <sup>1</sup>H NMR

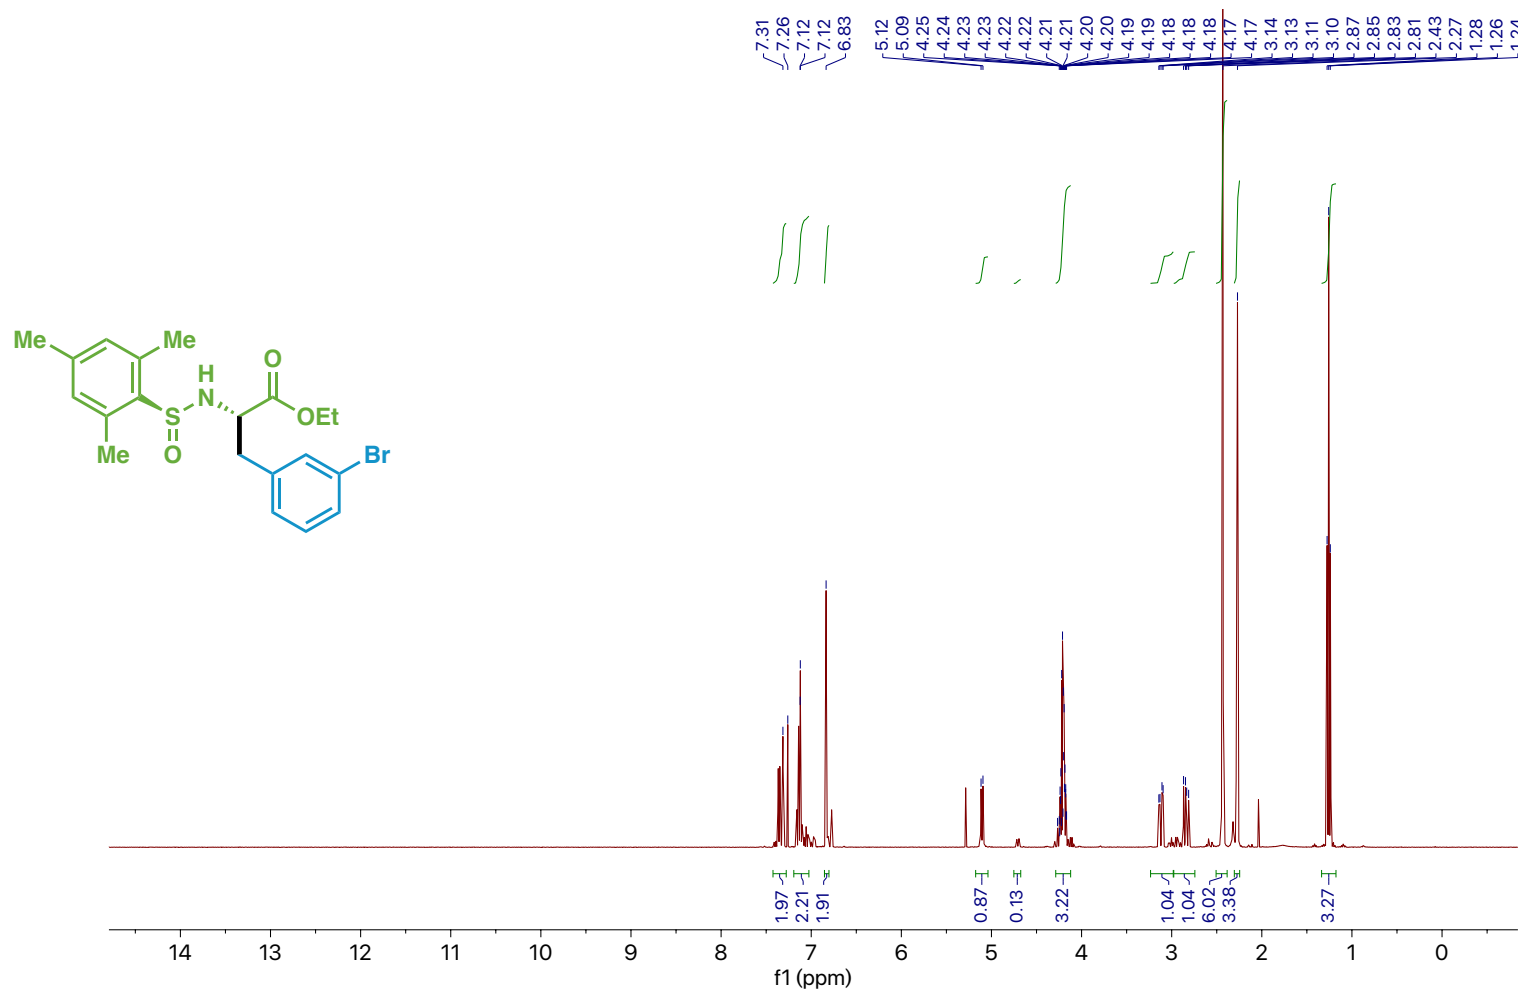

# Compound 65 <sup>13</sup>C NMR

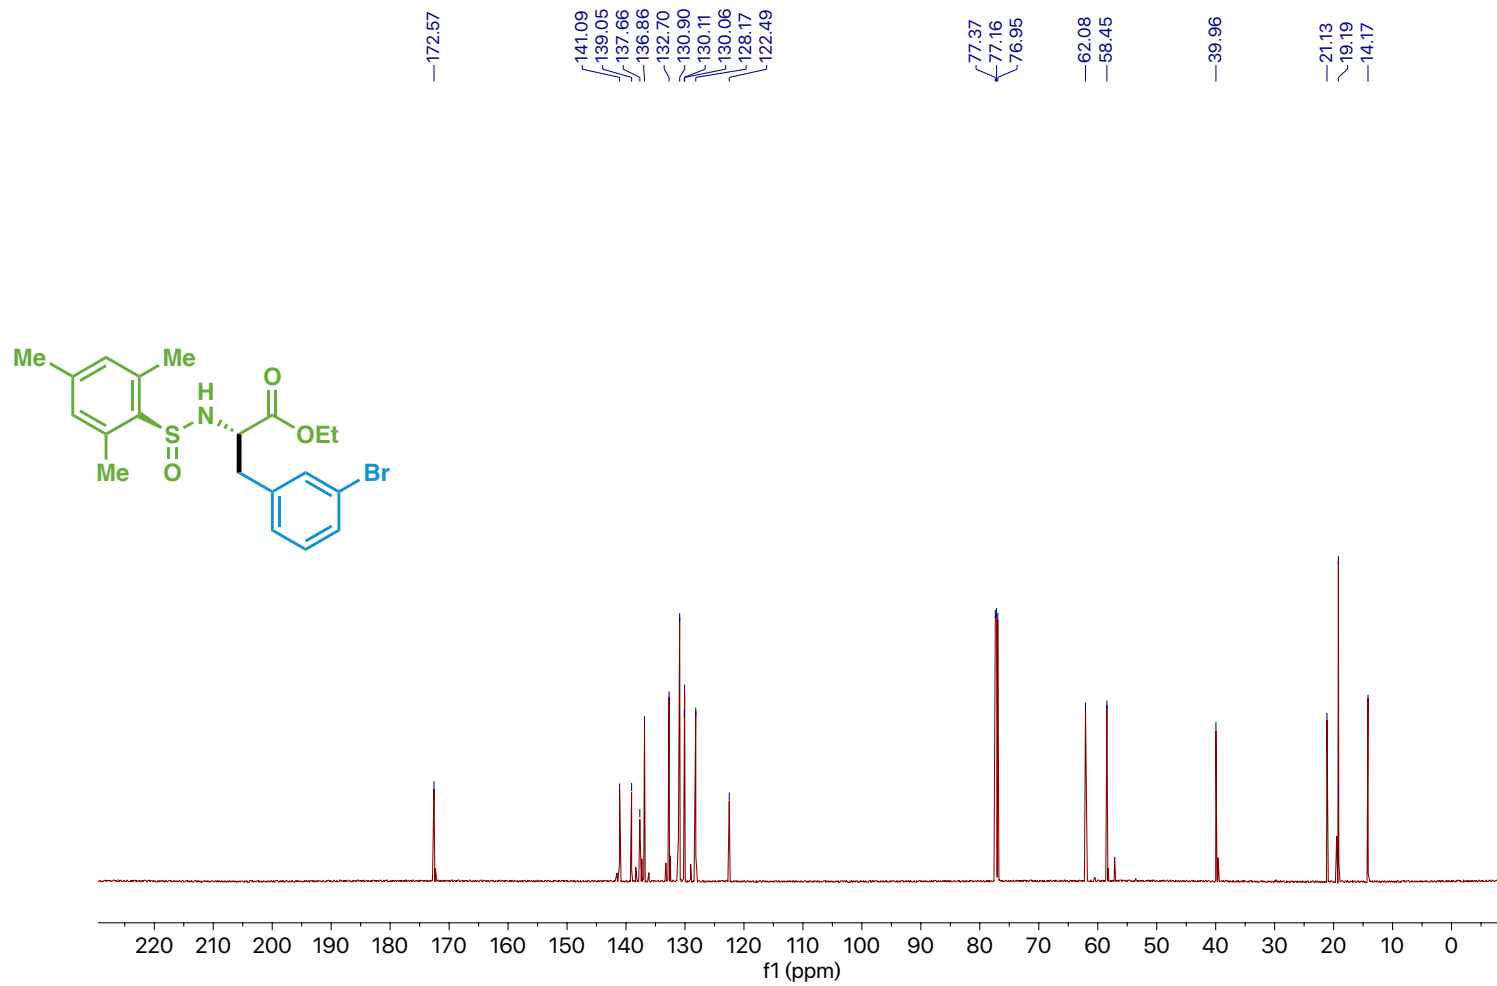





# Compound 66 <sup>13</sup>C NMR

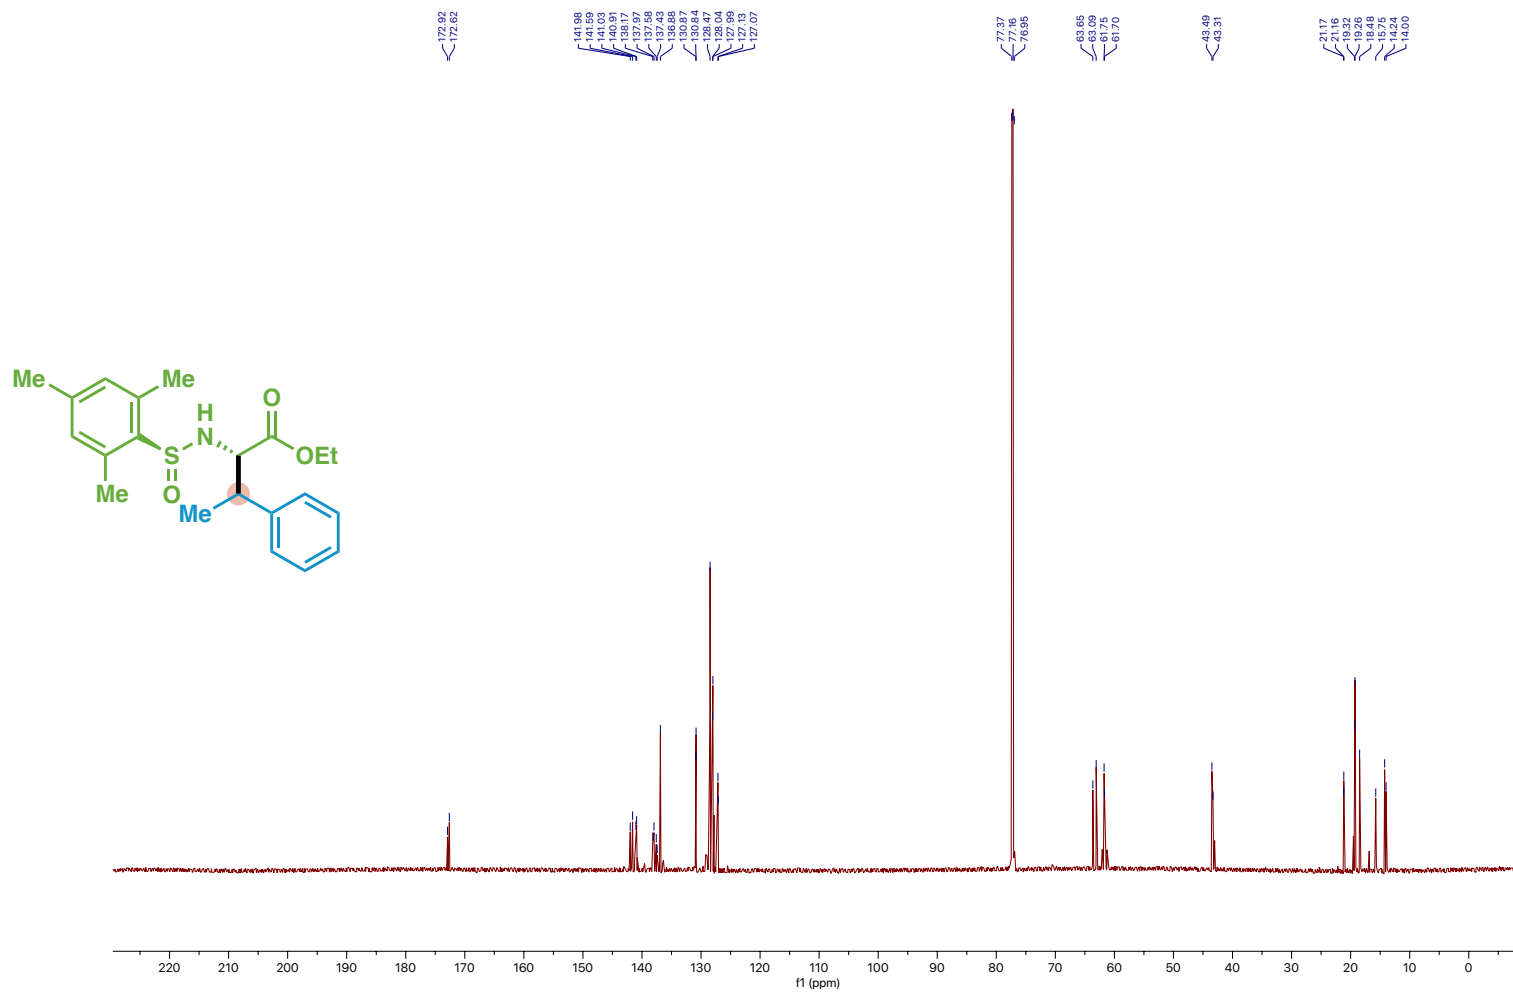

# Compound 84-1 <sup>1</sup>H NMR

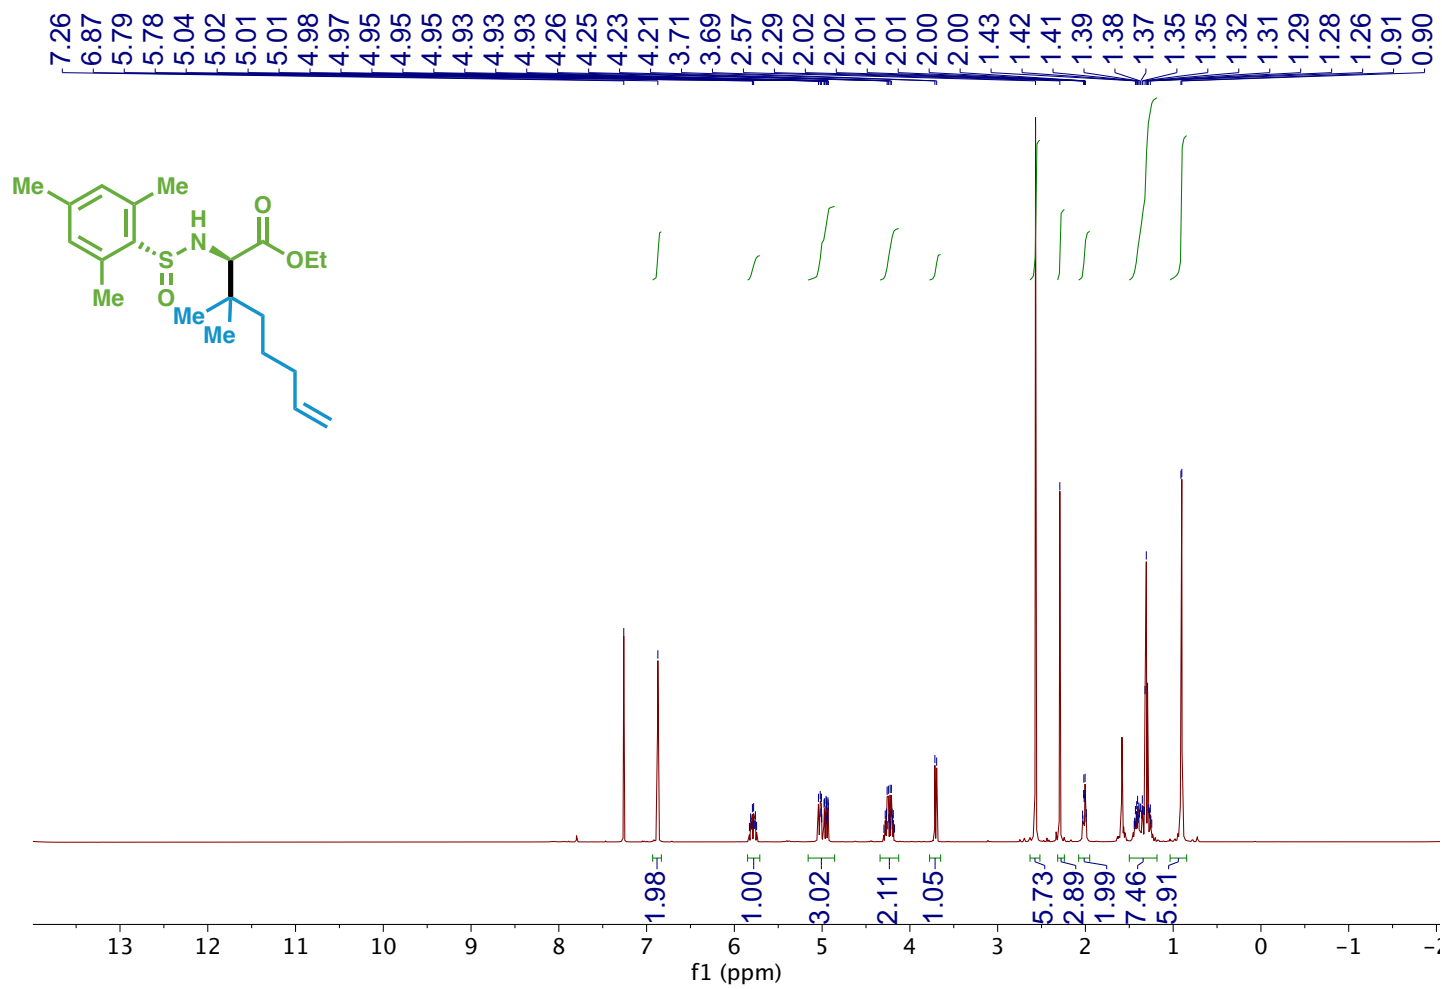

Supplement: NIHMS1007563-supplement-SI.pdf [file NIHMS1007563-supplement-SI.pdf]
